# Supplementary material for: Genetic and epigenetic fine mapping of causal autoimmune disease variants
Source: Springer Nature journal article supplement (doi:10.1038/nature13835), 2014-10-29
Supplement: nature13835-s1.xls [file nature13835-s1.xls]

## Sheet: masterfile9
Disease	IndexSNP_riskAllele	SNP	chr	pos	PICS_probability	Annotation	nearestGene	eQTL	eQTLdirection	topEnhancer	inferior_temporal_lobe	angular_gyrus	mid_frontal_lobe	cingulate_gyrus	substantia_nigra	anterior_caudate	hippocampus_middle	CD25-_CD45RA+_naive	CD25-_CD45RO+_mem	CD25+_CD127-_Treg	CD25-_IL17-_Th_stim_MACS	CD25-_IL17+_Th17_stim	Th0	Th1	Th2	CD45RA_CD8	CD45RO_CD8	adult_CD14	adult_CD20	GM12878	B_Cell_Centroblast	Mobilized_CD34	K562	colonic_mucosa	Duodenum_mucosa	AdiposeNuclei	HepG2	Liver1	Pancreatic_Islets	kidney	HSMM-myotube	NH-Osteoblast	chondrogenic_dif_cells
Asthma	rs4129267-T	rs4129267	chr1	154426264	0.1324	none	IL6R	none	NA	adult_CD14	1	1	1	1	1	1	1	1	1	1	1	1	1	1	1	1	1	1	0	1	1	1	1	1	1	1	1	1	1	1	1	1	1
Asthma	rs4129267-T	rs61812598	chr1	154420087	0.1324	none	IL6R	none	NA	none	0	0	0	0	0	0	0	0	0	0	0	0	0	0	0	0	0	0	0	0	0	0	0	0	0	0	0	0	0	0	0	0	0
Asthma	rs4129267-T	rs12126142	chr1	154425456	0.1324	none	IL6R	none	NA	adult_CD14	0	0	1	1	1	0	1	1	1	0	1	1	1	1	0	1	0	1	0	0	1	1	0	0	0	1	0	1	1	0	0	0	0
Asthma	rs4129267-T	rs2228145	chr1	154426970	0.0923	missense	IL6R	none	NA	adult_CD14	1	1	1	1	1	1	1	1	1	1	1	1	1	1	1	1	0	1	0	1	0	1	1	1	1	1	0	1	1	1	0	0	0
Asthma	rs4129267-T	rs12133641	chr1	154428283	0.0534	none	IL6R	none	NA	adult_CD14	0	0	0	0	1	0	0	1	1	1	1	1	1	1	1	0	1	1	1	0	1	1	0	1	1	0	1	1	1	0	0	0	0
Asthma	rs4129267-T	rs7512646	chr1	154420402	0.0464	none	IL6R	none	NA	none	0	0	0	0	0	0	0	0	0	0	0	0	0	0	0	0	0	0	0	0	0	0	0	0	0	0	0	0	0	0	0	0	0
Asthma	rs4129267-T	rs7529229	chr1	154420778	0.0464	none	IL6R	none	NA	none	0	0	0	0	0	0	0	0	0	0	0	0	0	0	0	0	0	0	0	0	0	0	0	0	0	0	0	0	0	0	0	0	0
Asthma	rs2786098	rs2786098	chr1	197325908	0.177	none	CRB1	none	NA	none	0	0	0	0	0	0	0	0	0	0	0	0	0	0	0	0	0	0	0	0	0	0	0	0	0	0	0	0	0	0	0	0	0
Asthma	rs2786098	rs2821116	chr1	197329041	0.177	none	CRB1	none	NA	none	0	0	0	0	0	0	0	0	0	0	0	0	0	0	0	0	0	0	0	0	0	0	0	0	0	0	0	0	0	0	0	0	0
Asthma	rs2786098	rs2821115	chr1	197330185	0.0818	none	CRB1	none	NA	none	0	0	0	0	0	0	0	0	0	0	0	0	0	0	0	0	0	0	0	0	0	0	0	0	0	0	0	0	0	0	0	0	0
Asthma	rs2786098	rs2786119	chr1	197329535	0.0682	none	CRB1	none	NA	none	0	0	0	0	0	0	0	0	0	0	0	0	0	0	0	0	0	0	0	0	0	0	0	0	0	0	0	0	0	0	0	0	0
Asthma	rs2786098	rs2786117	chr1	197332157	0.0682	none	CRB1	none	NA	none	0	0	0	0	0	0	0	0	0	0	0	0	0	0	0	0	0	0	0	0	0	0	0	0	0	0	0	0	0	0	0	0	0
Asthma	rs2786098	rs2786116	chr1	197333779	0.0682	none	CRB1	none	NA	none	0	0	0	0	0	0	0	0	0	0	0	0	0	0	0	0	0	0	0	0	0	0	0	0	0	0	0	0	0	0	0	0	0
Asthma	rs2786098	rs10801603	chr1	197337830	0.0585	none	CRB1	none	NA	none	0	0	0	0	0	0	0	0	0	0	0	0	0	0	0	0	0	0	0	0	0	0	0	0	0	0	0	0	0	0	0	0	0
Asthma	rs2786098	rs6664399	chr1	197339479	0.0448	none	CRB1	none	NA	none	0	0	0	0	0	0	0	0	0	0	0	0	0	0	0	0	0	0	0	0	0	0	0	0	0	0	0	0	0	0	0	0	0
Asthma	rs2786098	rs2821117	chr1	197328594	0.0398	none	CRB1	none	NA	none	0	0	0	0	0	0	0	0	0	0	0	0	0	0	0	0	0	0	0	0	0	0	0	0	0	0	0	0	0	0	0	0	0
Asthma	rs2786098	rs3122635	chr1	197324195	0.0319	none	CRB1	none	NA	GM12878	0	0	0	0	0	0	0	0	0	0	0	0	0	0	0	0	0	0	0	1	1	0	1	0	1	0	1	0	0	0	1	0	0
Asthma	rs2786098	rs3122636	chr1	197324200	0.0319	none	CRB1	none	NA	GM12878	0	0	0	0	0	0	0	0	0	0	0	0	0	0	0	0	0	0	0	1	1	0	1	0	1	0	1	0	0	0	1	0	0
Asthma	rs3771180	rs3771180	chr2	102953617	0.1339	none	IL1RL1	none	NA	kidney	0	0	1	0	0	0	0	1	0	1	1	1	1	1	1	1	0	0	0	0	0	0	1	1	1	1	0	1	0	1	1	1	1
Asthma	rs3771180	rs72823646	chr2	102954213	0.1339	none	IL1RL1	none	NA	kidney	0	0	1	0	0	0	0	1	0	1	1	1	1	1	1	1	0	0	0	0	0	0	1	1	1	1	0	1	0	1	1	1	1
Asthma	rs3771180	rs13431828	chr2	102954653	0.1339	utr5	IL1RL1	none	NA	Th2	0	0	0	0	0	0	0	0	0	1	1	1	0	0	1	1	0	0	0	0	1	1	1	1	1	1	0	1	0	1	1	0	1
Asthma	rs3771180	rs13408569	chr2	102955056	0.1339	none	IL1RL1	none	NA	Th2	0	0	0	0	0	0	0	0	0	1	1	1	0	0	1	1	0	0	0	0	1	1	1	1	1	1	0	1	0	1	1	0	1
Asthma	rs3771180	rs13408661	chr2	102955082	0.1339	none	IL1RL1	none	NA	Th2	0	0	0	0	0	0	0	0	0	1	1	1	0	0	1	1	0	0	0	0	1	1	1	1	1	1	0	1	0	1	1	0	1
Asthma	rs3771180	rs10173081	chr2	102957348	0.1339	none	IL1RL1	none	NA	none	0	0	0	0	0	0	0	0	0	0	0	0	0	0	0	0	0	0	0	0	0	0	0	0	0	0	0	0	0	0	0	0	0
Asthma	rs3771180	rs3771175	chr2	102960210	0.0493	utr3	IL1RL1	none	NA	none	0	0	0	0	0	0	0	0	0	0	0	0	0	0	0	0	0	0	0	0	0	0	0	0	0	0	0	0	0	0	0	0	0
Asthma	rs3771180	rs10197862	chr2	102966549	0.0489	none	IL1RL1	none	NA	none	0	0	0	0	0	0	0	0	0	0	0	0	0	0	0	0	0	0	0	0	0	0	0	0	0	0	0	0	0	0	0	0	0
Asthma	rs7686660-T	rs7686660	chr4	144003159	0.0422	none	none	none	NA	none	0	0	0	0	0	0	0	0	0	0	0	0	0	0	0	0	0	0	0	0	0	0	0	0	0	0	0	0	0	0	0	0	0
Asthma	rs7686660-T	rs4485768	chr4	143997558	0.0422	none	none	none	NA	none	0	0	0	0	0	0	0	0	0	0	0	0	0	0	0	0	0	0	0	0	0	0	0	0	0	0	0	0	0	0	0	0	0
Asthma	rs7686660-T	rs4367125	chr4	144000287	0.0422	none	none	none	NA	none	0	0	0	0	0	0	0	0	0	0	0	0	0	0	0	0	0	0	0	0	0	0	0	0	0	0	0	0	0	0	0	0	0
Asthma	rs7686660-T	rs7681219	chr4	144002951	0.0422	none	none	none	NA	none	0	0	0	0	0	0	0	0	0	0	0	0	0	0	0	0	0	0	0	0	0	0	0	0	0	0	0	0	0	0	0	0	0
Asthma	rs7686660-T	rs57778077	chr4	144003700	0.0422	none	none	none	NA	none	0	0	0	0	0	0	0	0	0	0	0	0	0	0	0	0	0	0	0	0	0	0	0	0	0	0	0	0	0	0	0	0	0
Asthma	rs7686660-T	rs28660021	chr4	144003851	0.0422	none	none	none	NA	none	0	0	0	0	0	0	0	0	0	0	0	0	0	0	0	0	0	0	0	0	0	0	0	0	0	0	0	0	0	0	0	0	0
Asthma	rs7686660-T	rs28496540	chr4	144003994	0.0422	none	none	none	NA	HSMM-myotube	0	0	0	0	0	0	0	1	0	0	0	0	0	1	0	0	0	1	0	0	0	0	0	1	0	1	0	0	0	0	1	0	0
Asthma	rs7686660-T	rs59799467	chr4	144004624	0.0422	none	none	none	NA	HSMM-myotube	0	0	0	0	0	0	0	1	0	0	0	0	0	1	0	0	0	1	0	0	0	0	0	1	0	1	0	0	0	0	1	0	0
Asthma	rs7686660-T	rs57921755	chr4	144004655	0.0422	none	none	none	NA	HSMM-myotube	0	0	0	0	0	0	0	1	0	0	0	0	0	1	0	0	0	1	0	0	0	0	0	1	0	1	0	0	0	0	1	0	0
Asthma	rs3805236-G	rs3805236	chr4	144357737	1	none	GAB1	none	NA	substantia_nigra	1	1	1	1	1	1	1	0	0	0	0	0	0	0	0	1	0	1	1	0	0	0	0	1	0	0	1	1	1	0	0	0	0
Asthma	rs1837253-C	rs1837253	chr5	110401872	1	none	none	none	NA	none	0	0	0	0	0	0	0	0	0	0	0	0	0	0	0	0	0	0	0	0	0	0	0	0	0	0	0	0	0	0	0	0	0
Asthma	rs2073643-T	rs2073643	chr5	131723288	0.5018	none	SLC22A5	none	NA	kidney	1	1	1	1	1	1	1	1	1	1	0	1	1	0	1	1	1	1	1	1	0	1	1	1	1	1	1	1	1	1	1	1	1
Asthma	rs2073643-T	rs2073644	chr5	131723289	0.3634	none	SLC22A5	none	NA	kidney	1	1	1	1	1	1	1	1	1	1	0	1	1	0	1	1	1	1	1	1	0	1	1	1	1	1	1	1	1	1	1	1	1
Asthma	rs1295686-T	rs1295686	chr5	131995843	0.3458	none	IL13	none	NA	Th2	0	0	0	0	0	0	0	0	1	0	0	0	1	1	1	0	0	0	0	1	0	0	1	0	0	0	0	0	0	0	0	0	0
Asthma	rs1295686-T	rs20541	chr5	131995964	0.2332	missense	IL13	none	NA	Th2	0	0	0	0	0	0	0	0	1	0	0	0	1	1	1	0	0	0	0	1	0	0	1	0	0	0	0	0	0	0	0	0	0
Asthma	rs1295686-T	rs1295685	chr5	131996445	0.1403	utr3	IL13	none	NA	GM12878	0	0	0	0	0	0	0	0	1	0	1	0	1	1	1	0	1	0	0	1	0	1	1	1	0	0	0	0	1	0	1	0	0
Asthma	rs1295686-T	rs848	chr5	131996500	0.1403	utr3	IL13	none	NA	GM12878	0	0	0	0	0	0	0	0	1	0	1	0	1	1	1	0	1	0	0	1	0	1	1	1	0	0	0	0	1	0	1	0	0
Asthma	rs1295686-T	rs847	chr5	131996669	0.1403	utr3	IL13	none	NA	GM12878	0	0	0	0	0	0	0	0	1	0	1	0	1	1	1	0	1	0	0	1	0	1	1	1	0	0	0	0	1	0	1	0	0
Asthma	rs3019885-G	rs3019885	chr8	118025645	0.1495	none	SLC30A8	none	NA	none	0	0	0	0	0	0	0	0	0	0	0	0	0	0	0	0	0	0	0	0	0	0	0	0	0	0	0	0	0	0	0	0	0
Asthma	rs3019885-G	rs3019883	chr8	118019621	0.068	none	SLC30A8	none	NA	none	0	0	0	0	0	0	0	0	0	0	0	0	0	0	0	0	0	0	0	0	0	0	0	0	0	0	0	0	0	0	0	0	0
Asthma	rs3019885-G	rs3019884	chr8	118020171	0.068	none	SLC30A8	none	NA	none	0	0	0	0	0	0	0	0	0	0	0	0	0	0	0	0	0	0	0	0	0	0	0	0	0	0	0	0	0	0	0	0	0
Asthma	rs3019885-G	rs2047963	chr8	118016843	0.0481	none	SLC30A8	none	NA	none	0	0	0	0	0	0	0	0	0	0	0	0	0	0	0	0	0	0	0	0	0	0	0	0	0	0	0	0	0	0	0	0	0
Asthma	rs3019885-G	rs3019879	chr8	118017287	0.0398	none	SLC30A8	none	NA	none	0	0	0	0	0	0	0	0	0	0	0	0	0	0	0	0	0	0	0	0	0	0	0	0	0	0	0	0	0	0	0	0	0
Asthma	rs3019885-G	rs2938861	chr8	118021472	0.0365	none	SLC30A8	none	NA	none	0	0	0	0	0	0	0	0	0	0	0	0	0	0	0	0	0	0	0	0	0	0	0	0	0	0	0	0	0	0	0	0	0
Asthma	rs3019885-G	rs1995581	chr8	118015903	0.0334	none	SLC30A8	none	NA	none	0	0	0	0	0	0	0	0	0	0	0	0	0	0	0	0	0	0	0	0	0	0	0	0	0	0	0	0	0	0	0	0	0
Asthma	rs3019885-G	rs3019886	chr8	118005136	0.0308	none	SLC30A8	none	NA	none	0	0	0	0	0	0	0	0	0	0	0	0	0	0	0	0	0	0	0	0	0	0	0	0	0	0	0	0	0	0	0	0	0
Asthma	rs3019885-G	rs3020119	chr8	118006571	0.0308	none	SLC30A8	none	NA	none	0	0	0	0	0	0	0	0	0	0	0	0	0	0	0	0	0	0	0	0	0	0	0	0	0	0	0	0	0	0	0	0	0
Asthma	rs3019885-G	rs2938863	chr8	118008221	0.0308	none	SLC30A8	none	NA	none	0	0	0	0	0	0	0	0	0	0	0	0	0	0	0	0	0	0	0	0	0	0	0	0	0	0	0	0	0	0	0	0	0
Asthma	rs3019885-G	rs1505525	chr8	118011864	0.0285	none	SLC30A8	none	NA	none	0	0	0	0	0	0	0	0	0	0	0	0	0	0	0	0	0	0	0	0	0	0	0	0	0	0	0	0	0	0	0	0	0
Asthma	rs3019885-G	rs3020122	chr8	118012030	0.0285	none	SLC30A8	none	NA	none	0	0	0	0	0	0	0	0	0	0	0	0	0	0	0	0	0	0	0	0	0	0	0	0	0	0	0	0	0	0	0	0	0
Asthma	rs3019885-G	rs2938864	chr8	118012265	0.0285	none	SLC30A8	none	NA	HSMM-myotube	0	0	0	0	0	0	0	0	0	0	0	0	0	0	0	1	0	0	0	0	0	0	0	1	0	0	0	0	0	0	1	0	0
Asthma	rs3019885-G	rs2047964	chr8	118014676	0.0285	none	SLC30A8	none	NA	none	0	0	0	0	0	0	0	0	0	0	0	0	0	0	0	0	0	0	0	0	0	0	0	0	0	0	0	0	0	0	0	0	0
Asthma	rs3019885-G	rs10099121	chr8	117997645	0.0284	none	SLC30A8	none	NA	none	0	0	0	0	0	0	0	0	0	0	0	0	0	0	0	0	0	0	0	0	0	0	0	0	0	0	0	0	0	0	0	0	0
Asthma	rs3019885-G	rs4242567	chr8	117999183	0.0284	none	SLC30A8	none	NA	none	0	0	0	0	0	0	0	0	0	0	0	0	0	0	0	0	0	0	0	0	0	0	0	0	0	0	0	0	0	0	0	0	0
Asthma	rs3019885-G	rs4269571	chr8	118001867	0.0284	none	SLC30A8	none	NA	none	0	0	0	0	0	0	0	0	0	0	0	0	0	0	0	0	0	0	0	0	0	0	0	0	0	0	0	0	0	0	0	0	0
Asthma	rs2381416	rs2381416	chr9	6193455	0.3115	none	none	none	NA	none	0	0	0	0	0	0	0	0	0	0	0	0	0	0	0	0	0	0	0	0	0	0	0	0	0	0	0	0	0	0	0	0	0
Asthma	rs2381416	rs2095044	chr9	6192796	0.1105	none	none	none	NA	none	0	0	0	0	0	0	0	0	0	0	0	0	0	0	0	0	0	0	0	0	0	0	0	0	0	0	0	0	0	0	0	0	0
Asthma	rs2381416	rs928412	chr9	6213148	0.097	none	none	none	NA	none	0	0	0	0	0	0	0	0	0	0	0	0	0	0	0	0	0	0	0	0	0	0	0	0	0	0	0	0	0	0	0	0	0
Asthma	rs2381416	rs928413	chr9	6213387	0.0862	none	none	none	NA	none	0	0	0	0	0	0	0	0	0	0	0	0	0	0	0	0	0	0	0	0	0	0	0	0	0	0	0	0	0	0	0	0	0
Asthma	rs2381416	rs1888909	chr9	6197392	0.0856	none	none	none	NA	none	0	0	0	0	0	0	0	0	0	0	0	0	0	0	0	0	0	0	0	0	0	0	0	0	0	0	0	0	0	0	0	0	0
Asthma	rs2381416	rs7848215	chr9	6213468	0.077	none	none	none	NA	none	0	0	0	0	0	0	0	0	0	0	0	0	0	0	0	0	0	0	0	0	0	0	0	0	0	0	0	0	0	0	0	0	0
Asthma	rs2381416	rs992969	chr9	6209697	0.0616	none	none	none	NA	none	0	0	0	0	0	0	0	0	0	0	0	0	0	0	0	0	0	0	0	0	0	0	0	0	0	0	0	0	0	0	0	0	0
Asthma	rs2381416	rs3939286	chr9	6210099	0.0616	none	none	none	NA	none	0	0	0	0	0	0	0	0	0	0	0	0	0	0	0	0	0	0	0	0	0	0	0	0	0	0	0	0	0	0	0	0	0
Asthma	rs10508372-C	rs10508372	chr10	8972018	0.7685	none	none	none	NA	none	0	0	0	0	0	0	0	0	0	0	0	0	0	0	0	0	0	0	0	0	0	0	0	0	0	0	0	0	0	0	0	0	0
Asthma	rs10508372-C	rs11255979	chr10	8969452	0.1323	none	none	none	NA	none	0	0	0	0	0	0	0	0	0	0	0	0	0	0	0	0	0	0	0	0	0	0	0	0	0	0	0	0	0	0	0	0	0
Asthma	rs10508372-C	rs10905488	chr10	8976044	0.0974	none	none	none	NA	none	0	0	0	0	0	0	0	0	0	0	0	0	0	0	0	0	0	0	0	0	0	0	0	0	0	0	0	0	0	0	0	0	0
Asthma	rs7922491-A	rs7922491	chr10	53493473	1	none	PRKG1	none	NA	none	0	0	0	0	0	0	0	0	0	0	0	0	0	0	0	0	0	0	0	0	0	0	0	0	0	0	0	0	0	0	0	0	0
Asthma	rs7130588-G	rs7130588	chr11	76270683	0.4524	none	none	none	NA	Th2	0	1	1	1	0	1	1	0	1	1	1	1	1	1	1	1	1	0	0	1	0	0	1	1	1	1	0	0	1	1	1	1	1
Asthma	rs7130588-G	rs6592645	chr11	76271005	0.3123	none	none	none	NA	Th2	0	1	1	1	0	1	1	0	1	1	1	1	1	1	1	1	1	0	0	1	0	0	1	1	1	1	0	0	1	1	1	1	1
Asthma	rs7130588-G	rs34350457	chr11	76281510	0.1098	none	none	none	NA	none	0	0	0	0	0	0	0	0	0	0	0	0	0	0	0	0	0	0	0	0	0	0	0	0	0	0	0	0	0	0	0	0	0
Asthma	rs7130588-G	rs7926914	chr11	76301255	0.0307	none	none	none	NA	Th2	0	0	0	0	0	0	0	0	0	1	1	1	1	1	1	0	0	0	0	0	1	1	1	1	1	1	0	1	0	1	0	0	0
Asthma	rs7130588-G	rs7927894	chr11	76301316	0.0307	none	none	none	NA	Th2	0	0	0	0	0	0	0	0	0	1	1	1	1	1	1	0	0	0	0	0	1	1	1	1	1	1	0	1	0	1	0	0	0
Asthma	rs7130588-G	rs7927997	chr11	76301375	0.0307	none	none	none	NA	Th2	0	0	0	0	0	0	0	0	0	1	1	1	1	1	1	0	0	0	0	0	1	1	1	1	1	1	0	1	0	1	0	0	0
Asthma	rs1701704-G	rs1701704	chr12	56412487	0.1964	none	IKZF4	none	NA	kidney	0	0	0	1	0	0	0	1	1	0	0	1	0	1	1	1	1	0	1	0	1	0	1	1	1	0	1	1	1	1	0	0	0
Asthma	rs1701704-G	rs2456973	chr12	56416928	0.0988	none	IKZF4	none	NA	K562	1	1	1	1	0	1	1	1	1	1	1	1	1	1	1	1	1	1	1	1	1	1	1	1	0	1	0	0	1	0	0	0	0
Asthma	rs1701704-G	rs61938962	chr12	56446766	0.0734	none	none	none	NA	none	0	0	0	0	0	0	0	0	0	0	0	0	0	0	0	0	0	0	0	0	0	0	0	0	0	0	0	0	0	0	0	0	0
Asthma	rs1701704-G	rs61938963	chr12	56446804	0.0734	none	none	none	NA	none	0	0	0	0	0	0	0	0	0	0	0	0	0	0	0	0	0	0	0	0	0	0	0	0	0	0	0	0	0	0	0	0	0
Asthma	rs1701704-G	rs34415530	chr12	56444632	0.065	none	none	none	NA	none	0	0	0	0	0	0	0	0	0	0	0	0	0	0	0	0	0	0	0	0	0	0	0	0	0	0	0	0	0	0	0	0	0
Asthma	rs1701704-G	rs705704	chr12	56435412	0.0471	none	none	none	NA	K562	1	1	1	1	1	1	1	1	1	1	1	1	1	1	1	1	1	1	1	1	1	1	1	1	1	1	1	1	1	1	1	1	1
Asthma	rs1701704-G	rs772921	chr12	56403577	0.047	none	none	none	NA	AdiposeNuclei	1	1	1	1	1	1	0	1	1	1	1	1	1	1	1	1	1	0	0	1	0	0	1	1	0	1	1	1	1	1	0	0	0
Asthma	rs1701704-G	rs1702877	chr12	56427808	0.047	none	IKZF4	none	NA	Th1	0	0	0	0	1	0	0	1	1	1	1	1	1	1	1	0	1	0	0	0	1	1	0	0	0	0	0	0	1	0	0	0	0
Asthma	rs1701704-G	rs2640564	chr12	56455294	0.0355	none	none	none	NA	none	0	0	0	0	0	0	0	0	0	0	0	0	0	0	0	0	0	0	0	0	0	0	0	0	0	0	0	0	0	0	0	0	0
Asthma	rs1701704-G	rs7302200	chr12	56449435	0.0354	none	none	none	NA	NH-Osteoblast	0	0	0	0	0	0	0	1	0	0	0	1	0	1	1	1	0	0	0	0	1	1	0	0	0	0	0	0	0	0	1	1	1
Asthma	rs1701704-G	rs10876866	chr12	56445366	0.0325	none	none	none	NA	none	0	0	0	0	0	0	0	0	0	0	0	0	0	0	0	0	0	0	0	0	0	0	0	0	0	0	0	0	0	0	0	0	0
Asthma	rs1701704-G	rs1689510	chr12	56396768	0.0298	none	SUOX	none	NA	none	0	0	0	0	0	0	0	0	0	0	0	0	0	0	0	0	0	0	0	0	0	0	0	0	0	0	0	0	0	0	0	0	0
Asthma	rs11071559-C	rs11071559	chr15	61069988	0.1323	none	RORA	none	NA	CD25-_IL17+_Th17_stim	0	0	0	0	0	0	0	0	1	0	0	1	1	0	0	0	0	0	0	0	1	0	1	1	0	0	0	0	0	1	1	0	0
Asthma	rs11071559-C	rs10519067	chr15	61068347	0.0559	none	RORA	none	NA	CD25-_IL17+_Th17_stim	0	0	0	0	0	0	0	0	1	0	1	1	1	1	0	0	0	0	0	0	1	0	0	0	0	0	0	1	0	0	0	0	0
Asthma	rs11071559-C	rs10519068	chr15	61068704	0.0487	none	RORA	none	NA	CD25-_IL17+_Th17_stim	0	0	0	0	0	0	0	0	1	0	1	1	1	1	0	0	0	0	0	0	1	0	0	0	0	0	0	1	0	0	0	0	0
Asthma	rs11071559-C	rs34753162	chr15	61069177	0.043	none	RORA	none	NA	CD25-_IL17+_Th17_stim	0	0	0	0	0	0	0	0	1	0	1	1	1	1	0	0	0	0	0	0	1	0	0	0	0	0	0	1	0	0	0	0	0
Asthma	rs11071559-C	rs34986765	chr15	61069201	0.043	none	RORA	none	NA	CD25-_IL17+_Th17_stim	0	0	0	0	0	0	0	0	1	0	1	1	1	1	0	0	0	0	0	0	1	0	0	0	0	0	0	1	0	0	0	0	0
Asthma	rs11071559-C	rs11071558	chr15	61069421	0.043	none	RORA	none	NA	CD25-_IL17+_Th17_stim	0	0	0	0	0	0	0	0	1	0	1	1	1	1	0	0	0	0	0	0	1	0	0	0	0	0	0	1	0	0	0	0	0
Asthma	rs11071559-C	rs11071557	chr15	61068954	0.0384	none	RORA	none	NA	CD25-_IL17+_Th17_stim	0	0	0	0	0	0	0	0	1	0	1	1	1	1	0	0	0	0	0	0	1	0	0	0	0	0	0	1	0	0	0	0	0
Asthma	rs11071559-C	rs11639084	chr15	61066516	0.0312	none	RORA	none	NA	CD25-_IL17+_Th17_stim	1	0	0	0	0	0	0	0	1	1	1	1	1	1	0	1	0	0	0	0	0	0	1	0	0	0	1	0	0	0	1	0	0
Asthma	rs744910-G	rs744910	chr15	67446785	0.3857	none	SMAD3	none	NA	NH-Osteoblast	0	0	0	0	1	1	0	0	0	1	1	0	1	1	1	0	1	1	1	1	0	0	0	1	0	1	1	0	1	1	1	1	1
Asthma	rs744910-G	rs11634793	chr15	67447452	0.3857	none	SMAD3	none	NA	NH-Osteoblast	0	0	0	0	0	0	0	1	1	1	1	1	1	1	0	1	1	1	1	1	0	0	1	1	1	1	1	1	0	1	1	1	1
Asthma	rs744910-G	rs10152544	chr15	67444747	0.2045	none	SMAD3	none	NA	NH-Osteoblast	0	0	0	0	0	0	0	1	1	1	1	1	1	1	0	0	1	1	1	1	1	1	0	1	0	1	1	0	1	1	1	1	1
Asthma	rs11078927	rs11078927	chr17	38064405	0.0944	none	GSDMB	none	NA	none	0	0	0	0	0	0	0	0	0	0	0	0	0	0	0	0	0	0	0	0	0	0	0	0	0	0	0	0	0	0	0	0	0
Asthma	rs11078927	rs11078928	chr17	38064469	0.0944	nearsplice	GSDMB	none	NA	none	0	0	0	0	0	0	0	0	0	0	0	0	0	0	0	0	0	0	0	0	0	0	0	0	0	0	0	0	0	0	0	0	0
Asthma	rs11078927	rs4795399	chr17	38061439	0.0568	none	GSDMB	none	NA	none	0	0	0	0	0	0	0	0	0	0	0	0	0	0	0	0	0	0	0	0	0	0	0	0	0	0	0	0	0	0	0	0	0
Asthma	rs11078927	rs2305480	chr17	38062196	0.0568	missense	GSDMB	none	NA	none	0	0	0	0	0	0	0	0	0	0	0	0	0	0	0	0	0	0	0	0	0	0	0	0	0	0	0	0	0	0	0	0	0
Asthma	rs11078927	rs11078926	chr17	38062976	0.0459	none	GSDMB	none	NA	none	0	0	0	0	0	0	0	0	0	0	0	0	0	0	0	0	0	0	0	0	0	0	0	0	0	0	0	0	0	0	0	0	0
Asthma	rs11078927	rs12939832	chr17	38064876	0.0459	none	GSDMB	none	NA	none	0	0	0	0	0	0	0	0	0	0	0	0	0	0	0	0	0	0	0	0	0	0	0	0	0	0	0	0	0	0	0	0	0
Asthma	rs11078927	rs8069176	chr17	38057197	0.0387	none	none	none	NA	none	0	0	0	0	0	0	0	0	0	0	0	0	0	0	0	0	0	0	0	0	0	0	0	0	0	0	0	0	0	0	0	0	0
Asthma	rs11078927	rs12949100	chr17	38057189	0.0335	none	none	none	NA	none	0	0	0	0	0	0	0	0	0	0	0	0	0	0	0	0	0	0	0	0	0	0	0	0	0	0	0	0	0	0	0	0	0
Asthma	rs2284033-G	rs2284033	chr22	37534034	0.2783	none	IL2RB	none	NA	CD25-_IL17+_Th17_stim	0	0	0	0	0	0	0	1	1	1	1	1	1	1	1	1	1	0	0	1	0	0	0	0	0	0	0	0	0	0	0	0	0
Asthma	rs2284033-G	rs228958	chr22	37533795	0.1345	none	IL2RB	none	NA	CD25-_IL17+_Th17_stim	0	0	0	0	0	0	0	1	1	1	1	1	1	1	1	1	1	0	0	1	0	0	0	0	0	0	0	0	0	0	0	0	0
Asthma	rs2284033-G	rs228957	chr22	37533786	0.0979	none	IL2RB	none	NA	CD25-_IL17+_Th17_stim	0	0	0	0	0	0	0	1	1	1	1	1	1	1	1	1	1	0	0	1	0	0	0	0	0	0	0	0	0	0	0	0	0
Asthma	rs2284033-G	rs228954	chr22	37532665	0.0913	none	IL2RB	none	NA	CD25+_CD127-_Treg	0	0	0	0	0	0	0	1	1	1	1	1	1	0	0	1	1	0	0	0	0	0	0	0	0	0	0	0	0	0	0	0	0
Asthma	rs2284033-G	rs228960	chr22	37534947	0.0757	none	IL2RB	none	NA	CD25-_IL17+_Th17_stim	0	0	0	0	0	0	0	1	1	1	1	1	1	1	1	1	1	0	1	1	1	0	0	0	0	0	0	1	0	0	1	0	0
Asthma	rs2284033-G	rs228953	chr22	37531436	0.0752	synonymous	IL2RB	none	NA	CD25+_CD127-_Treg	0	0	0	0	0	0	0	1	1	1	1	1	1	1	0	1	0	0	0	1	0	0	0	0	0	0	0	1	0	0	0	0	0
Asthma	rs2284033-G	rs228955	chr22	37532699	0.0631	none	IL2RB	none	NA	CD25+_CD127-_Treg	0	0	0	0	0	0	0	1	1	1	1	1	1	0	0	1	1	0	0	0	0	0	0	0	0	0	0	0	0	0	0	0	0
Asthma	rs2284033-G	rs228965	chr22	37537058	0.0506	none	IL2RB	none	NA	CD25-_IL17+_Th17_stim	0	0	0	0	0	0	0	1	1	1	1	1	1	1	1	0	1	0	0	1	0	0	0	0	0	0	0	0	0	0	0	0	0
Asthma	rs2284033-G	rs228963	chr22	37535948	0.048	none	IL2RB	none	NA	CD25-_IL17-_Th_stim_MACS	0	0	0	0	0	0	0	1	1	1	1	1	1	1	1	1	1	0	0	1	1	1	0	0	0	0	0	1	0	0	1	0	0
Asthma	rs2284033-G	rs2543537	chr22	37531117	0.0411	none	IL2RB	none	NA	CD25+_CD127-_Treg	0	0	0	0	0	0	0	1	0	1	1	1	1	1	1	0	1	0	0	1	1	0	0	0	0	0	0	1	1	0	0	0	0
Asthma	rs2284033-G	rs228966	chr22	37537514	0.0372	none	IL2RB	none	NA	CD25+_CD127-_Treg	0	0	0	0	0	0	0	1	1	1	1	1	1	0	1	1	0	0	0	1	0	0	0	0	0	0	0	1	0	0	0	0	0
Atopic_dermatitis	rs72702813-T	rs72702813	chr1	152600854	0.9466	none	none	none	NA	AdiposeNuclei	0	0	0	0	0	0	0	0	0	0	0	0	0	0	1	0	0	0	0	0	0	0	0	0	0	1	0	0	0	0	0	0	0
Atopic_dermatitis	rs72702813-T	rs72702900	chr1	152771963	0.0532	none	none	none	NA	none	0	0	0	0	0	0	0	0	0	0	0	0	0	0	0	0	0	0	0	0	0	0	0	0	0	0	0	0	0	0	0	0	0
Atopic_dermatitis	rs759382-C	rs759382	chr2	103094213	0.5771	none	SLC9A4	none	NA	none	0	0	0	0	0	0	0	0	0	0	0	0	0	0	0	0	0	0	0	0	0	0	0	0	0	0	0	0	0	0	0	0	0
Atopic_dermatitis	rs759382-C	rs759381	chr2	103094323	0.052	none	SLC9A4	none	NA	none	0	0	0	0	0	0	0	0	0	0	0	0	0	0	0	0	0	0	0	0	0	0	0	0	0	0	0	0	0	0	0	0	0
Atopic_dermatitis	rs17389644-A	rs17389644	chr4	123497697	0.1574	none	none	none	NA	Th0	0	0	0	1	0	0	0	0	0	0	1	0	1	1	1	1	0	0	0	0	0	0	0	0	0	0	0	0	0	0	0	0	0
Atopic_dermatitis	rs17389644-A	rs72669177	chr4	123480484	0.1323	none	none	none	NA	none	0	0	0	0	0	0	0	0	0	0	0	0	0	0	0	0	0	0	0	0	0	0	0	0	0	0	0	0	0	0	0	0	0
Atopic_dermatitis	rs17389644-A	rs72669153	chr4	123429029	0.1231	none	none	none	NA	CD25-_IL17-_Th_stim_MACS	0	0	0	0	0	0	0	1	1	0	1	1	1	1	1	0	0	0	0	0	1	0	0	0	0	0	0	0	0	0	0	0	0
Atopic_dermatitis	rs17389644-A	rs17454584	chr4	123353432	0.1082	none	none	none	NA	none	0	0	0	0	0	0	0	0	0	0	0	0	0	0	0	0	0	0	0	0	0	0	0	0	0	0	0	0	0	0	0	0	0
Atopic_dermatitis	rs17389644-A	rs1383046	chr4	123315270	0.1034	none	ADAD1	none	NA	none	0	0	0	0	0	0	0	0	0	0	0	0	0	0	0	0	0	0	0	0	0	0	0	0	0	0	0	0	0	0	0	0	0
Atopic_dermatitis	rs17389644-A	rs45610037	chr4	123403008	0.1026	none	none	none	NA	K562	0	0	0	0	0	0	0	0	1	1	0	0	0	0	0	0	0	0	0	0	1	0	1	0	0	0	0	0	0	0	0	0	1
Atopic_dermatitis	rs17389644-A	rs72669185	chr4	123502008	0.0767	none	none	none	NA	Th1	0	0	0	0	0	0	0	1	1	0	0	1	1	1	1	0	0	0	0	0	0	0	0	0	0	0	0	0	0	0	0	0	0
Atopic_dermatitis	rs17389644-A	rs1127348	chr4	123280860	0.0722	synonymous	KIAA1109	none	NA	none	0	0	0	0	0	0	0	0	0	0	0	0	0	0	0	0	0	0	0	0	0	0	0	0	0	0	0	0	0	0	0	0	0
Atopic_dermatitis	rs17389644-A	rs56313700	chr4	123287573	0.0466	none	none	none	NA	none	0	0	0	0	0	0	0	0	0	0	0	0	0	0	0	0	0	0	0	0	0	0	0	0	0	0	0	0	0	0	0	0	0
Atopic_dermatitis	rs848-T	rs848	chr5	131996500	0.3	utr3	IL13	none	NA	GM12878	0	0	0	0	0	0	0	0	1	0	1	0	1	1	1	0	1	0	0	1	0	1	1	1	0	0	0	0	1	0	1	0	0
Atopic_dermatitis	rs848-T	rs1295685	chr5	131996445	0.3	utr3	IL13	none	NA	GM12878	0	0	0	0	0	0	0	0	1	0	1	0	1	1	1	0	1	0	0	1	0	1	1	1	0	0	0	0	1	0	1	0	0
Atopic_dermatitis	rs848-T	rs847	chr5	131996669	0.3	utr3	IL13	none	NA	GM12878	0	0	0	0	0	0	0	0	1	0	1	0	1	1	1	0	1	0	0	1	0	1	1	1	0	0	0	0	1	0	1	0	0
Atopic_dermatitis	rs848-T	rs20541	chr5	131995964	0.0556	missense	IL13	none	NA	Th2	0	0	0	0	0	0	0	0	1	0	0	0	1	1	1	0	0	0	0	1	0	0	1	0	0	0	0	0	0	0	0	0	0
Atopic_dermatitis	rs848-T	rs1295686	chr5	131995843	0.0443	none	IL13	none	NA	Th2	0	0	0	0	0	0	0	0	1	0	0	0	1	1	1	0	0	0	0	1	0	0	1	0	0	0	0	0	0	0	0	0	0
Atopic_dermatitis	rs12295535-A	rs12295535	chr11	36432024	0.0908	none	PRR5L	none	NA	Th1	1	1	1	1	1	1	1	1	1	0	1	1	1	1	1	1	1	1	1	0	1	1	1	1	1	1	0	1	0	1	0	0	1
Atopic_dermatitis	rs12295535-A	rs77229041	chr11	36423418	0.0908	none	PRR5L	none	NA	none	0	0	0	0	0	0	0	0	0	0	0	0	0	0	0	0	0	0	0	0	0	0	0	0	0	0	0	0	0	0	0	0	0
Atopic_dermatitis	rs12295535-A	rs28520436	chr11	36428447	0.0908	none	PRR5L	none	NA	Mobilized_CD34	1	1	1	1	1	1	1	0	1	1	1	1	1	1	1	1	1	1	1	0	1	1	0	1	1	1	0	1	0	0	0	0	0
Atopic_dermatitis	rs12295535-A	rs74688172	chr11	36430658	0.0908	none	PRR5L	none	NA	Th1	1	1	1	1	1	1	1	1	1	1	1	1	1	1	1	1	1	1	1	1	0	1	1	1	1	1	0	1	1	1	0	1	1
Atopic_dermatitis	rs12295535-A	rs77190366	chr11	36430848	0.0908	none	PRR5L	none	NA	Th1	1	1	1	1	1	1	1	1	1	1	1	1	1	1	1	1	1	1	1	1	0	1	1	1	1	1	0	1	1	1	0	1	1
Atopic_dermatitis	rs12295535-A	rs56403503	chr11	36431969	0.0908	none	PRR5L	none	NA	Th1	1	1	1	1	1	1	1	1	1	0	1	1	1	1	1	1	1	1	1	0	1	1	1	1	1	1	0	1	0	1	0	0	1
Atopic_dermatitis	rs12295535-A	rs12270539	chr11	36432134	0.0908	none	PRR5L	none	NA	Th1	1	1	1	1	1	1	1	1	1	0	1	1	1	1	1	1	1	1	1	0	1	1	1	1	1	1	0	1	0	1	0	0	1
Atopic_dermatitis	rs7110818-A	rs7110818	chr11	76292575	0.2227	none	none	none	NA	kidney	0	0	0	0	0	1	1	0	0	0	0	0	0	0	1	0	0	0	0	0	0	0	0	1	1	1	0	1	1	1	1	1	1
Atopic_dermatitis	rs7110818-A	rs61893460	chr11	76291154	0.2227	none	none	none	NA	kidney	0	0	0	0	0	1	1	0	0	0	0	0	0	0	1	0	0	0	0	0	0	0	0	1	1	1	0	1	1	1	1	1	1
Atopic_dermatitis	rs7110818-A	rs7126418	chr11	76292573	0.2227	none	none	none	NA	kidney	0	0	0	0	0	1	1	0	0	0	0	0	0	0	1	0	0	0	0	0	0	0	0	1	1	1	0	1	1	1	1	1	1
Atopic_dermatitis	rs7110818-A	rs11236791	chr11	76295598	0.0791	none	none	none	NA	none	0	0	0	0	0	0	0	0	0	0	0	0	0	0	0	0	0	0	0	0	0	0	0	0	0	0	0	0	0	0	0	0	0
Atopic_dermatitis	rs7110818-A	rs141401802	chr11	76298625	0.0791	none	none	none	NA	Th2	0	0	0	0	0	0	0	0	0	1	1	1	1	1	1	1	1	0	0	0	0	1	0	1	1	1	0	1	0	1	0	0	0
Atopic_dermatitis	rs7110818-A	rs11236797	chr11	76299649	0.0694	none	none	none	NA	Th2	1	1	1	1	1	1	1	0	1	1	1	1	1	1	1	0	1	1	1	1	1	1	0	1	1	1	1	1	1	1	1	1	0
Atopic_dermatitis	rs7110818-A	rs2212434	chr11	76281593	0.0448	none	none	none	NA	none	0	0	0	0	0	0	0	0	0	0	0	0	0	0	0	0	0	0	0	0	0	0	0	0	0	0	0	0	0	0	0	0	0
Atopic_dermatitis	rs2041733-A	rs2041733	chr16	11229589	0.7364	none	CLEC16A	none	NA	AdiposeNuclei	1	1	1	1	1	1	1	0	0	0	0	1	1	0	1	0	0	1	0	1	0	0	1	1	1	1	1	1	1	1	1	1	1
Atopic_dermatitis	rs2041733-A	rs11645657	chr16	11223454	0.2411	none	CLEC16A	none	NA	Th2	0	0	0	0	0	0	0	1	1	1	1	1	1	1	1	1	1	1	0	1	0	1	1	1	1	1	1	1	1	1	0	1	0
Atopic_dermatitis	rs16948048-G	rs16948048	chr17	47440466	0.2229	none	none	none	NA	cingulate_gyrus	1	1	1	1	1	1	1	1	1	1	1	1	1	1	1	1	1	1	1	1	1	1	1	1	1	1	1	1	1	1	1	1	1
Atopic_dermatitis	rs16948048-G	rs35073649	chr17	47422510	0.0732	none	ZNF652	none	NA	none	0	0	0	0	0	0	0	0	0	0	0	0	0	0	0	0	0	0	0	0	0	0	0	0	0	0	0	0	0	0	0	0	0
Atopic_dermatitis	rs16948048-G	rs7207729	chr17	47423740	0.0732	none	ZNF652	none	NA	none	0	0	0	0	0	0	0	0	0	0	0	0	0	0	0	0	0	0	0	0	0	0	0	0	0	0	0	0	0	0	0	0	0
Atopic_dermatitis	rs16948048-G	rs6504608	chr17	47424681	0.0732	none	ZNF652	none	NA	none	0	0	0	0	0	0	0	0	0	0	0	0	0	0	0	0	0	0	0	0	0	0	0	0	0	0	0	0	0	0	0	0	0
Atopic_dermatitis	rs16948048-G	rs71369297	chr17	47423912	0.068	none	ZNF652	none	NA	none	0	0	0	0	0	0	0	0	0	0	0	0	0	0	0	0	0	0	0	0	0	0	0	0	0	0	0	0	0	0	0	0	0
Atopic_dermatitis	rs16948048-G	rs35587648	chr17	47418178	0.0634	none	ZNF652	none	NA	adult_CD20	0	1	0	1	1	1	1	1	1	1	1	1	1	1	1	1	1	1	1	1	1	1	1	1	0	0	0	1	1	0	0	0	0
Atopic_dermatitis	rs16948048-G	rs112502960	chr17	47439302	0.0592	utr5	ZNF652	none	NA	substantia_nigra	1	1	1	1	1	1	1	1	1	1	1	1	1	1	1	1	1	1	1	1	1	1	1	1	1	1	1	1	1	1	1	1	1
Atopic_dermatitis	rs16948048-G	rs12952581	chr17	47448346	0.0459	none	none	none	NA	none	0	0	0	0	0	0	0	0	0	0	0	0	0	0	0	0	0	0	0	0	0	0	0	0	0	0	0	0	0	0	0	0	0
Atopic_dermatitis	rs16948048-G	rs35317317	chr17	47450521	0.0291	none	none	none	NA	adult_CD20	0	0	0	0	1	0	1	0	1	0	0	0	0	0	0	0	0	0	1	1	0	0	0	0	0	0	0	0	0	0	0	0	0
Atopic_dermatitis	rs16948048-G	rs12953014	chr17	47453444	0.0276	none	none	none	NA	none	0	0	0	0	0	0	0	0	0	0	0	0	0	0	0	0	0	0	0	0	0	0	0	0	0	0	0	0	0	0	0	0	0
Atopic_dermatitis	rs16948048-G	rs28406364	chr17	47454507	0.0276	none	none	none	NA	none	0	0	0	0	0	0	0	0	0	0	0	0	0	0	0	0	0	0	0	0	0	0	0	0	0	0	0	0	0	0	0	0	0
Atopic_dermatitis	rs16948048-G	rs28412876	chr17	47454515	0.0276	none	none	none	NA	none	0	0	0	0	0	0	0	0	0	0	0	0	0	0	0	0	0	0	0	0	0	0	0	0	0	0	0	0	0	0	0	0	0
Atopic_dermatitis	rs909341-G	rs909341	chr20	62328742	0.1356	synonymous	RTEL1	none	NA	angular_gyrus	1	1	1	1	1	1	1	1	1	1	1	1	1	1	1	1	0	0	0	1	0	0	1	1	1	1	1	1	1	1	1	1	0
Atopic_dermatitis	rs909341-G	rs2297441	chr20	62327582	0.0742	utr3	RTEL1	none	NA	mid_frontal_lobe	1	1	1	1	1	1	1	1	1	1	1	1	1	1	1	1	0	1	1	1	0	1	1	1	1	1	1	1	1	1	1	1	1
Atopic_dermatitis	rs909341-G	rs2257440	chr20	62328267	0.0742	synonymous	RTEL1	none	NA	mid_frontal_lobe	1	1	1	1	1	1	1	1	1	1	1	1	1	1	1	1	0	1	1	1	0	1	1	1	1	1	1	1	1	1	1	1	1
Atopic_dermatitis	rs909341-G	rs1291205	chr20	62328829	0.0742	synonymous	RTEL1	none	NA	angular_gyrus	1	1	1	1	1	1	1	1	1	1	1	1	1	1	1	1	0	0	0	1	0	0	1	1	1	1	1	1	1	1	1	1	0
Atopic_dermatitis	rs909341-G	rs2258056	chr20	62328453	0.0576	synonymous	RTEL1	none	NA	angular_gyrus	1	1	1	1	1	1	1	1	1	1	1	1	1	1	1	1	0	0	0	1	0	0	1	1	1	1	1	1	1	1	1	1	0
Atopic_dermatitis	rs909341-G	rs3208008	chr20	62326110	0.0573	missense	RTEL1	none	NA	none	0	0	0	0	0	0	0	0	0	0	0	0	0	0	0	0	0	0	0	0	0	0	0	0	0	0	0	0	0	0	0	0	0
Atopic_dermatitis	rs909341-G	rs1291206	chr20	62329169	0.0469	none	RTEL1	none	NA	angular_gyrus	1	1	1	1	1	1	1	1	1	1	1	1	1	1	1	1	0	0	0	1	0	0	1	1	1	1	1	1	1	1	1	1	0
Atopic_dermatitis	rs909341-G	rs1291207	chr20	62329412	0.0335	none	RTEL1	none	NA	angular_gyrus	1	1	1	1	1	1	1	1	1	1	1	1	1	1	1	1	0	0	0	1	0	0	1	1	1	1	1	1	1	1	1	1	0
Atopic_dermatitis	rs909341-G	rs2257885	chr20	62334220	0.0289	none	ARFRP1	none	NA	none	0	0	0	0	0	0	0	0	0	0	0	0	0	0	0	0	0	0	0	0	0	0	0	0	0	0	0	0	0	0	0	0	0
Atopic_dermatitis	rs909341-G	rs1291209	chr20	62330439	0.0288	utr3	ARFRP1	none	NA	HSMM-myotube	1	1	1	1	1	1	1	1	1	1	1	1	1	1	1	0	1	0	1	1	0	1	1	1	1	1	1	1	1	1	1	1	1
Atopic_dermatitis	rs3126085-A	rs3126085	chr1	152300817	0.0446	none	AK056431	none	NA	NH-Osteoblast	0	0	0	0	0	0	0	0	0	0	0	0	0	0	0	1	0	0	0	0	0	0	0	0	0	0	0	0	0	0	1	1	1
Atopic_dermatitis	rs3126085-A	rs36142010	chr1	152302627	0.0446	none	AK056431	none	NA	NH-Osteoblast	0	0	0	0	0	0	0	0	0	0	0	0	0	0	0	0	0	0	0	1	0	0	0	0	0	0	0	0	0	0	1	1	1
Atopic_dermatitis	rs3126085-A	rs3126088	chr1	152305785	0.0446	none	AK056431	none	NA	none	0	0	0	0	0	0	0	0	0	0	0	0	0	0	0	0	0	0	0	0	0	0	0	0	0	0	0	0	0	0	0	0	0
Atopic_dermatitis	rs3126085-A	rs3126089	chr1	152306187	0.0446	none	AK056431	none	NA	none	0	0	0	0	0	0	0	0	0	0	0	0	0	0	0	0	0	0	0	0	0	0	0	0	0	0	0	0	0	0	0	0	0
Atopic_dermatitis	rs3126085-A	rs1858482	chr1	152306921	0.0446	none	AK056431	none	NA	none	0	0	0	0	0	0	0	0	0	0	0	0	0	0	0	0	0	0	0	0	0	0	0	0	0	0	0	0	0	0	0	0	0
Atopic_dermatitis	rs3126085-A	rs3126092	chr1	152307955	0.0446	none	AK056431	none	NA	none	0	0	0	0	0	0	0	0	0	0	0	0	0	0	0	0	0	0	0	0	0	0	0	0	0	0	0	0	0	0	0	0	0
Atopic_dermatitis	rs3126085-A	rs3126095	chr1	152309683	0.0446	none	AK056431	none	NA	none	0	0	0	0	0	0	0	0	0	0	0	0	0	0	0	0	0	0	0	0	0	0	0	0	0	0	0	0	0	0	0	0	0
Atopic_dermatitis	rs2271404-G	rs2271404	chr2	112003867	0.529	none	LOC541471	none	NA	HSMM-myotube	0	0	0	0	0	0	0	0	0	0	0	0	0	1	1	0	0	0	0	0	0	0	0	0	0	0	1	0	0	0	1	1	0
Atopic_dermatitis	rs2271404-G	rs72837860	chr2	112007572	0.3404	none	LOC541471	none	NA	HSMM-myotube	0	0	0	0	0	0	0	0	0	1	0	0	0	0	1	1	0	0	0	0	0	0	0	0	0	0	0	1	0	0	1	1	1
Atopic_dermatitis	rs2271404-G	rs72837840	chr2	111956771	0.0398	none	none	none	NA	none	0	0	0	0	0	0	0	0	0	0	0	0	0	0	0	0	0	0	0	0	0	0	0	0	0	0	0	0	0	0	0	0	0
Atopic_dermatitis	rs2271404-G	rs72837842	chr2	111961277	0.0398	none	none	none	NA	none	0	0	0	0	0	0	0	0	0	0	0	0	0	0	0	0	0	0	0	0	0	0	0	0	0	0	0	0	0	0	0	0	0
Atopic_dermatitis	rs12634229-G	rs12634229	chr3	112376308	0.9926	none	none	none	NA	none	0	0	0	0	0	0	0	0	0	0	0	0	0	0	0	0	0	0	0	0	0	0	0	0	0	0	0	0	0	0	0	0	0
Atopic_dermatitis	rs4722404-G	rs4722404	chr7	3128789	0.3031	none	none	none	NA	none	0	0	0	0	0	0	0	0	0	0	0	0	0	0	0	0	0	0	0	0	0	0	0	0	0	0	0	0	0	0	0	0	0
Atopic_dermatitis	rs4722404-G	rs4719784	chr7	3128750	0.0706	none	none	none	NA	none	0	0	0	0	0	0	0	0	0	0	0	0	0	0	0	0	0	0	0	0	0	0	0	0	0	0	0	0	0	0	0	0	0
Atopic_dermatitis	rs4722404-G	rs10951034	chr7	3129705	0.0468	none	none	none	NA	CD25-_CD45RO+_mem	0	0	0	0	0	0	0	1	1	1	1	1	1	1	1	1	1	0	1	0	0	0	0	1	0	0	0	0	0	0	0	0	0
Atopic_dermatitis	rs4722404-G	rs10272575	chr7	3129847	0.0468	none	none	none	NA	CD25-_CD45RO+_mem	0	0	0	0	0	0	0	1	1	1	1	1	1	1	1	1	1	0	1	0	0	0	0	1	0	0	0	0	0	0	0	0	0
Atopic_dermatitis	rs4722404-G	rs10272700	chr7	3129928	0.0468	none	none	none	NA	CD25-_CD45RO+_mem	0	0	0	0	0	0	0	1	1	1	1	1	1	1	1	1	1	0	1	0	0	0	0	1	0	0	0	0	0	0	0	0	0
Atopic_dermatitis	rs4722404-G	rs12700563	chr7	3131525	0.0468	none	none	none	NA	Th0	0	0	0	0	1	1	1	1	1	1	1	1	1	1	1	1	1	1	1	1	1	1	0	1	1	0	0	1	0	0	0	0	0
Atopic_dermatitis	rs4722404-G	rs4719786	chr7	3131451	0.0426	none	none	none	NA	Th0	0	0	0	0	1	1	1	1	1	1	1	1	1	1	1	1	1	1	1	1	1	1	0	1	1	0	0	1	0	0	0	0	0
Atopic_dermatitis	rs4722404-G	rs6967018	chr7	3133584	0.0388	none	none	none	NA	CD25-_CD45RA+_naive	0	0	0	1	1	1	1	1	1	1	1	1	1	1	1	1	1	1	1	1	1	0	1	1	1	0	0	1	0	0	0	0	0
Atopic_dermatitis	rs4722404-G	rs4236317	chr7	3134593	0.0388	none	none	none	NA	CD25-_CD45RO+_mem	1	0	1	1	1	1	1	1	1	1	1	1	1	1	1	1	1	1	1	1	1	1	1	1	1	0	0	1	0	1	0	0	0
Atopic_dermatitis	rs4722404-G	rs71029618	chr7	3130033	0.0352	none	none	none	NA	CD25-_CD45RO+_mem	0	0	0	0	0	0	0	1	1	1	1	1	1	1	1	1	1	0	1	0	0	0	0	1	0	0	0	0	0	0	0	0	0
Atopic_dermatitis	rs4722404-G	rs10951035	chr7	3130536	0.0292	none	none	none	NA	CD25-_CD45RA+_naive	0	0	0	0	0	0	0	1	1	1	1	1	1	1	1	1	1	0	1	1	0	0	0	0	0	0	0	0	0	0	0	0	0
Atopic_dermatitis	rs4722404-G	rs6461825	chr7	3127105	0.0287	none	none	none	NA	none	0	0	0	0	0	0	0	0	0	0	0	0	0	0	0	0	0	0	0	0	0	0	0	0	0	0	0	0	0	0	0	0	0
Atopic_dermatitis	rs4722404-G	rs6965630	chr7	3138656	0.0277	none	none	none	NA	none	0	0	0	0	0	0	0	0	0	0	0	0	0	0	0	0	0	0	0	0	0	0	0	0	0	0	0	0	0	0	0	0	0
Atopic_dermatitis	rs4722404-G	rs28458463	chr7	3139506	0.0277	none	none	none	NA	none	0	0	0	0	0	0	0	0	0	0	0	0	0	0	0	0	0	0	0	0	0	0	0	0	0	0	0	0	0	0	0	0	0
Atopic_dermatitis	rs878860-G	rs878860	chr11	7968359	0.1659	none	none	none	NA	none	0	0	0	0	0	0	0	0	0	0	0	0	0	0	0	0	0	0	0	0	0	0	0	0	0	0	0	0	0	0	0	0	0
Atopic_dermatitis	rs878860-G	rs1397602	chr11	7968690	0.1659	none	none	none	NA	none	0	0	0	0	0	0	0	0	0	0	0	0	0	0	0	0	0	0	0	0	0	0	0	0	0	0	0	0	0	0	0	0	0
Atopic_dermatitis	rs878860-G	rs12787269	chr11	7970050	0.1659	none	none	none	NA	none	0	0	0	0	0	0	0	0	0	0	0	0	0	0	0	0	0	0	0	0	0	0	0	0	0	0	0	0	0	0	0	0	0
Atopic_dermatitis	rs878860-G	rs7947377	chr11	7967214	0.0903	none	none	none	NA	none	0	0	0	0	0	0	0	0	0	0	0	0	0	0	0	0	0	0	0	0	0	0	0	0	0	0	0	0	0	0	0	0	0
Atopic_dermatitis	rs878860-G	rs3911598	chr11	7967315	0.0903	none	none	none	NA	none	0	0	0	0	0	0	0	0	0	0	0	0	0	0	0	0	0	0	0	0	0	0	0	0	0	0	0	0	0	0	0	0	0
Atopic_dermatitis	rs878860-G	rs7928841	chr11	7970595	0.0903	none	none	none	NA	none	0	0	0	0	0	0	0	0	0	0	0	0	0	0	0	0	0	0	0	0	0	0	0	0	0	0	0	0	0	0	0	0	0
Atopic_dermatitis	rs878860-G	rs4421735	chr11	7977152	0.0903	none	none	none	NA	none	0	0	0	0	0	0	0	0	0	0	0	0	0	0	0	0	0	0	0	0	0	0	0	0	0	0	0	0	0	0	0	0	0
Atopic_dermatitis	rs878860-G	rs4312054	chr11	7977161	0.0571	none	none	none	NA	none	0	0	0	0	0	0	0	0	0	0	0	0	0	0	0	0	0	0	0	0	0	0	0	0	0	0	0	0	0	0	0	0	0
Atopic_dermatitis	rs878860-G	rs67352348	chr11	7977997	0.0478	none	none	none	NA	none	0	0	0	0	0	0	0	0	0	0	0	0	0	0	0	0	0	0	0	0	0	0	0	0	0	0	0	0	0	0	0	0	0
Atopic_dermatitis	rs479844-G	rs479844	chr11	65551957	0.8954	none	none	none	NA	none	0	0	0	0	0	0	0	0	0	0	0	0	0	0	0	0	0	0	0	0	0	0	0	0	0	0	0	0	0	0	0	0	0
Atopic_dermatitis	rs479844-G	rs10791824	chr11	65559266	0.1032	none	OVOL1	none	NA	colonic_mucosa	0	0	0	0	0	0	0	0	1	1	0	1	1	1	1	0	0	1	1	1	1	0	0	1	1	0	0	1	1	1	0	0	0
Atopic_dermatitis	rs2164983-A	rs2164983	chr19	8789381	0.0493	none	none	none	NA	none	0	0	0	0	0	0	0	0	0	0	0	0	0	0	0	0	0	0	0	0	0	0	0	0	0	0	0	0	0	0	0	0	0
Atopic_dermatitis	rs2164983-A	rs140189131	chr19	8788302	0.0493	none	none	none	NA	none	0	0	0	0	0	0	0	0	0	0	0	0	0	0	0	0	0	0	0	0	0	0	0	0	0	0	0	0	0	0	0	0	0
Atopic_dermatitis	rs2164983-A	rs2967673	chr19	8788798	0.0493	none	none	none	NA	none	0	0	0	0	0	0	0	0	0	0	0	0	0	0	0	0	0	0	0	0	0	0	0	0	0	0	0	0	0	0	0	0	0
Atopic_dermatitis	rs2164983-A	rs1473280	chr19	8789091	0.0493	none	none	none	NA	none	0	0	0	0	0	0	0	0	0	0	0	0	0	0	0	0	0	0	0	0	0	0	0	0	0	0	0	0	0	0	0	0	0
Atopic_dermatitis	rs2164983-A	rs1473281	chr19	8789230	0.0493	none	none	none	NA	none	0	0	0	0	0	0	0	0	0	0	0	0	0	0	0	0	0	0	0	0	0	0	0	0	0	0	0	0	0	0	0	0	0
Atopic_dermatitis	rs2164983-A	rs199766767	chr19	8789418	0.0493	none	none	none	NA	none	0	0	0	0	0	0	0	0	0	0	0	0	0	0	0	0	0	0	0	0	0	0	0	0	0	0	0	0	0	0	0	0	0
Atopic_dermatitis	rs2164983-A	rs2967675	chr19	8789484	0.0493	none	none	none	NA	none	0	0	0	0	0	0	0	0	0	0	0	0	0	0	0	0	0	0	0	0	0	0	0	0	0	0	0	0	0	0	0	0	0
Atopic_dermatitis	rs2164983-A	rs2967676	chr19	8789666	0.0493	none	none	none	NA	none	0	0	0	0	0	0	0	0	0	0	0	0	0	0	0	0	0	0	0	0	0	0	0	0	0	0	0	0	0	0	0	0	0
Atopic_dermatitis	rs2164983-A	rs2967677	chr19	8789721	0.0493	none	none	none	NA	none	0	0	0	0	0	0	0	0	0	0	0	0	0	0	0	0	0	0	0	0	0	0	0	0	0	0	0	0	0	0	0	0	0
Atopic_dermatitis	rs2164983-A	rs2918307	chr19	8789722	0.0493	none	none	none	NA	none	0	0	0	0	0	0	0	0	0	0	0	0	0	0	0	0	0	0	0	0	0	0	0	0	0	0	0	0	0	0	0	0	0
Atopic_dermatitis	rs2164983-A	rs2918308	chr19	8789912	0.0493	none	none	none	NA	none	0	0	0	0	0	0	0	0	0	0	0	0	0	0	0	0	0	0	0	0	0	0	0	0	0	0	0	0	0	0	0	0	0
Atopic_dermatitis	rs2164983-A	rs2918309	chr19	8789923	0.0493	none	none	none	NA	none	0	0	0	0	0	0	0	0	0	0	0	0	0	0	0	0	0	0	0	0	0	0	0	0	0	0	0	0	0	0	0	0	0
Atopic_dermatitis	rs2164983-A	rs7253377	chr19	8790015	0.0493	none	none	none	NA	none	0	0	0	0	0	0	0	0	0	0	0	0	0	0	0	0	0	0	0	0	0	0	0	0	0	0	0	0	0	0	0	0	0
Atopic_dermatitis	rs2164983-A	rs2967678	chr19	8790198	0.0493	none	none	none	NA	none	0	0	0	0	0	0	0	0	0	0	0	0	0	0	0	0	0	0	0	0	0	0	0	0	0	0	0	0	0	0	0	0	0
Atopic_dermatitis	rs2164983-A	rs2918302	chr19	8785744	0.0312	none	none	none	NA	none	0	0	0	0	0	0	0	0	0	0	0	0	0	0	0	0	0	0	0	0	0	0	0	0	0	0	0	0	0	0	0	0	0
Atopic_dermatitis	rs2164983-A	rs2967684	chr19	8786624	0.0312	none	none	none	NA	none	0	0	0	0	0	0	0	0	0	0	0	0	0	0	0	0	0	0	0	0	0	0	0	0	0	0	0	0	0	0	0	0	0
Atopic_dermatitis	rs2164983-A	rs4499342	chr19	8786913	0.0312	none	none	none	NA	none	0	0	0	0	0	0	0	0	0	0	0	0	0	0	0	0	0	0	0	0	0	0	0	0	0	0	0	0	0	0	0	0	0
Atopic_dermatitis	rs2164983-A	rs2918301	chr19	8786918	0.0312	none	none	none	NA	none	0	0	0	0	0	0	0	0	0	0	0	0	0	0	0	0	0	0	0	0	0	0	0	0	0	0	0	0	0	0	0	0	0
Atopic_dermatitis	rs2164983-A	rs2967685	chr19	8786966	0.0312	none	none	none	NA	none	0	0	0	0	0	0	0	0	0	0	0	0	0	0	0	0	0	0	0	0	0	0	0	0	0	0	0	0	0	0	0	0	0
Atopic_dermatitis	rs2164983-A	rs11670067	chr19	8787643	0.0312	none	none	none	NA	none	0	0	0	0	0	0	0	0	0	0	0	0	0	0	0	0	0	0	0	0	0	0	0	0	0	0	0	0	0	0	0	0	0
Atopic_dermatitis	rs2164983-A	rs61154119	chr19	8787750	0.0312	none	none	none	NA	none	0	0	0	0	0	0	0	0	0	0	0	0	0	0	0	0	0	0	0	0	0	0	0	0	0	0	0	0	0	0	0	0	0
Atopic_dermatitis	rs16999165-T	rs16999165	chr20	52807221	0.3218	none	none	none	NA	none	0	0	0	0	0	0	0	0	0	0	0	0	0	0	0	0	0	0	0	0	0	0	0	0	0	0	0	0	0	0	0	0	0
Atopic_dermatitis	rs16999165-T	rs111559352	chr20	52807144	0.3218	none	none	none	NA	none	0	0	0	0	0	0	0	0	0	0	0	0	0	0	0	0	0	0	0	0	0	0	0	0	0	0	0	0	0	0	0	0	0
Atopic_dermatitis	rs16999165-T	rs62214554	chr20	52807262	0.3218	none	none	none	NA	none	0	0	0	0	0	0	0	0	0	0	0	0	0	0	0	0	0	0	0	0	0	0	0	0	0	0	0	0	0	0	0	0	0
Atopic_dermatitis	rs16999165-T	rs12625233	chr20	52811968	0.0327	none	none	none	NA	HepG2	0	0	0	0	0	0	0	1	0	0	0	0	0	0	0	0	1	0	0	1	0	0	0	0	1	0	1	0	0	1	0	0	1
Allergy	rs2056417-A	rs2056417	chr1	10581658	0.0784	none	PEX14	none	NA	Th2	0	0	0	0	0	0	0	1	1	1	1	0	1	1	1	1	1	1	1	1	0	0	0	0	1	1	1	0	1	0	0	1	0
Allergy	rs2056417-A	rs1411402	chr1	10579545	0.0784	none	PEX14	none	NA	Pancreatic_Islets	0	0	0	0	0	0	0	0	0	1	1	0	0	1	1	1	0	0	0	1	1	0	1	1	1	0	1	1	1	1	0	1	0
Allergy	rs2056417-A	rs2483677	chr1	10580891	0.0554	none	PEX14	none	NA	none	0	0	0	0	0	0	0	0	0	0	0	0	0	0	0	0	0	0	0	0	0	0	0	0	0	0	0	0	0	0	0	0	0
Allergy	rs2056417-A	rs2480785	chr1	10569258	0.0428	none	PEX14	none	NA	Pancreatic_Islets	0	0	0	0	0	0	0	1	1	1	1	1	1	0	1	1	1	0	1	1	1	1	1	0	1	1	0	1	1	1	1	1	1
Allergy	rs2056417-A	rs616402	chr1	10566272	0.0388	none	PEX14	none	NA	none	0	0	0	0	0	0	0	0	0	0	0	0	0	0	0	0	0	0	0	0	0	0	0	0	0	0	0	0	0	0	0	0	0
Allergy	rs2056417-A	rs617728	chr1	10566522	0.0388	none	PEX14	none	NA	none	0	0	0	0	0	0	0	0	0	0	0	0	0	0	0	0	0	0	0	0	0	0	0	0	0	0	0	0	0	0	0	0	0
Allergy	rs2056417-A	rs2506880	chr1	10568277	0.0328	none	PEX14	none	NA	kidney	0	0	0	0	0	0	0	0	1	1	1	1	1	1	1	0	1	0	1	1	1	1	1	1	1	1	1	1	1	1	1	1	0
Allergy	rs10174949-A	rs10174949	chr2	8442248	0.1946	none	LINC00299	none	NA	GM12878	1	1	1	1	1	1	1	1	1	1	1	1	1	1	1	1	1	1	0	1	1	1	1	1	1	1	0	1	0	1	1	0	0
Allergy	rs10174949-A	rs13416555	chr2	8441735	0.1946	none	LINC00299	none	NA	adult_CD14	1	1	1	0	0	0	1	0	1	1	1	1	1	1	1	1	0	1	1	1	1	1	0	1	1	0	0	1	0	0	0	0	0
Allergy	rs10174949-A	rs10178845	chr2	8443803	0.1946	none	LINC00299	none	NA	adult_CD14	1	1	1	1	1	1	1	0	1	1	1	1	1	1	1	1	1	1	1	1	1	1	1	1	1	1	0	1	0	1	0	0	0
Allergy	rs10174949-A	rs891058	chr2	8442547	0.1365	none	LINC00299	none	NA	GM12878	1	1	1	1	1	1	1	1	1	1	1	1	1	1	1	1	1	1	0	1	1	1	1	1	1	1	0	1	0	1	1	0	0
Allergy	rs10174949-A	rs346835	chr2	8438693	0.046	none	LINC00299	none	NA	adult_CD14	1	1	1	1	1	1	1	0	0	0	1	1	1	0	1	0	0	1	0	1	0	0	1	1	1	0	0	1	0	0	0	0	0
Allergy	rs10174949-A	rs13395467	chr2	8451498	0.0366	none	LINC00299	none	NA	Th0	0	0	0	0	0	0	0	1	1	1	1	1	1	1	1	1	1	1	0	1	1	0	1	1	0	0	1	1	0	0	0	0	0
Allergy	rs10174949-A	rs367023	chr2	8450123	0.0334	none	LINC00299	none	NA	CD25-_IL17+_Th17_stim	0	0	0	0	0	0	0	0	1	1	1	1	1	1	1	1	1	1	0	1	1	0	0	1	0	0	1	1	0	0	0	0	0
Allergy	rs10189629-A	rs10189629	chr2	102879464	0.21	none	none	none	NA	Th1	0	0	0	0	0	0	0	0	1	0	0	0	1	1	1	0	1	0	0	0	1	0	0	0	1	0	0	0	0	0	1	0	0
Allergy	rs10189629-A	rs11692065	chr2	102883975	0.21	none	none	none	NA	none	0	0	0	0	0	0	0	0	0	0	0	0	0	0	0	0	0	0	0	0	0	0	0	0	0	0	0	0	0	0	0	0	0
Allergy	rs10189629-A	rs11674302	chr2	102887128	0.21	none	none	none	NA	none	0	0	0	0	0	0	0	0	0	0	0	0	0	0	0	0	0	0	0	0	0	0	0	0	0	0	0	0	0	0	0	0	0
Allergy	rs10189629-A	rs72998585	chr2	102858490	0.076	none	none	none	NA	kidney	0	0	0	1	0	0	0	0	1	1	0	0	1	0	0	0	1	1	1	1	0	0	0	1	1	1	0	1	0	1	0	1	1
Allergy	rs10189629-A	rs13406331	chr2	102866644	0.076	none	none	none	NA	none	0	0	0	0	0	0	0	0	0	0	0	0	0	0	0	0	0	0	0	0	0	0	0	0	0	0	0	0	0	0	0	0	0
Allergy	rs10189629-A	rs139210940	chr2	102882345	0.076	none	none	none	NA	none	0	0	0	0	0	0	0	0	0	0	0	0	0	0	0	0	0	0	0	0	0	0	0	0	0	0	0	0	0	0	0	0	0
Allergy	rs10189629-A	rs143483913	chr2	102882351	0.076	none	none	none	NA	none	0	0	0	0	0	0	0	0	0	0	0	0	0	0	0	0	0	0	0	0	0	0	0	0	0	0	0	0	0	0	0	0	0
Allergy	rs10497813-G	rs10497813	chr2	198914072	0.0424	none	PLCL1	none	NA	none	0	0	0	0	0	0	0	0	0	0	0	0	0	0	0	0	0	0	0	0	0	0	0	0	0	0	0	0	0	0	0	0	0
Allergy	rs10497813-G	rs1583792	chr2	198900288	0.0424	none	PLCL1	none	NA	none	0	0	0	0	0	0	0	0	0	0	0	0	0	0	0	0	0	0	0	0	0	0	0	0	0	0	0	0	0	0	0	0	0
Allergy	rs10497813-G	rs962210	chr2	198902230	0.0424	none	PLCL1	none	NA	none	0	0	0	0	0	0	0	0	0	0	0	0	0	0	0	0	0	0	0	0	0	0	0	0	0	0	0	0	0	0	0	0	0
Allergy	rs10497813-G	rs10497811	chr2	198902909	0.0424	none	PLCL1	none	NA	none	0	0	0	0	0	0	0	0	0	0	0	0	0	0	0	0	0	0	0	0	0	0	0	0	0	0	0	0	0	0	0	0	0
Allergy	rs10497813-G	rs1371664	chr2	198904465	0.0424	none	PLCL1	none	NA	substantia_nigra	1	1	1	1	1	1	1	1	1	1	1	1	1	0	1	1	1	0	0	0	1	0	1	0	0	0	0	0	0	1	0	0	0
Allergy	rs10497813-G	rs2196174	chr2	198905172	0.0424	none	PLCL1	none	NA	substantia_nigra	1	1	1	1	1	1	1	1	1	1	1	1	1	0	1	1	1	0	0	0	1	0	1	0	0	0	0	0	0	1	0	0	0
Allergy	rs10497813-G	rs10206714	chr2	198906481	0.0424	none	PLCL1	none	NA	Th2	1	1	0	1	1	1	1	1	1	1	1	1	1	1	1	1	1	0	1	1	1	1	1	0	1	0	1	0	0	1	0	0	1
Allergy	rs10497813-G	rs745899	chr2	198908040	0.0424	none	PLCL1	none	NA	Th2	1	1	1	1	1	0	1	1	1	1	1	1	1	1	1	1	0	0	1	1	0	0	1	0	1	0	1	0	0	1	0	0	0
Allergy	rs10497813-G	rs67031482	chr2	198911166	0.0424	none	PLCL1	none	NA	Th2	0	1	0	1	1	0	0	1	1	1	1	1	1	1	1	1	1	0	0	0	1	0	0	0	0	0	0	0	0	1	0	0	0
Allergy	rs10497813-G	rs67748055	chr2	198911426	0.0424	none	PLCL1	none	NA	Th2	0	0	1	1	1	0	1	1	0	1	1	0	1	1	1	1	0	0	0	1	0	0	1	0	1	0	0	0	0	1	0	0	0
Allergy	rs10497813-G	rs6732340	chr2	198912952	0.0424	none	PLCL1	none	NA	none	0	0	0	0	0	0	0	0	0	0	0	0	0	0	0	0	0	0	0	0	0	0	0	0	0	0	0	0	0	0	0	0	0
Allergy	rs10497813-G	rs2117339	chr2	198915734	0.0424	none	PLCL1	none	NA	none	0	0	0	0	0	0	0	0	0	0	0	0	0	0	0	0	0	0	0	0	0	0	0	0	0	0	0	0	0	0	0	0	0
Allergy	rs10497813-G	rs2196175	chr2	198905073	0.0289	none	PLCL1	none	NA	substantia_nigra	1	1	1	1	1	1	1	1	1	1	1	1	1	0	1	1	1	0	0	0	1	0	1	0	0	0	0	0	0	1	0	0	0
Allergy	rs9860547-A	rs9860547	chr3	188128979	0.0938	none	LPP	none	NA	none	0	0	0	0	0	0	0	0	0	0	0	0	0	0	0	0	0	0	0	0	0	0	0	0	0	0	0	0	0	0	0	0	0
Allergy	rs9860547-A	rs11335233	chr3	188124992	0.0548	none	LPP	none	NA	none	0	0	0	0	0	0	0	0	0	0	0	0	0	0	0	0	0	0	0	0	0	0	0	0	0	0	0	0	0	0	0	0	0
Allergy	rs9860547-A	rs73192661	chr3	188128794	0.0548	none	LPP	none	NA	none	0	0	0	0	0	0	0	0	0	0	0	0	0	0	0	0	0	0	0	0	0	0	0	0	0	0	0	0	0	0	0	0	0
Allergy	rs9860547-A	rs12639588	chr3	188121263	0.0434	none	LPP	none	NA	none	0	0	0	0	0	0	0	0	0	0	0	0	0	0	0	0	0	0	0	0	0	0	0	0	0	0	0	0	0	0	0	0	0
Allergy	rs9860547-A	rs2049218	chr3	188122978	0.0434	none	LPP	none	NA	none	0	0	0	0	0	0	0	0	0	0	0	0	0	0	0	0	0	0	0	0	0	0	0	0	0	0	0	0	0	0	0	0	0
Allergy	rs9860547-A	rs60946162	chr3	188133336	0.0364	none	LPP	none	NA	B_Cell_Centroblast	0	0	0	0	0	0	0	0	0	0	0	0	1	0	0	0	0	0	0	0	1	0	0	0	0	0	0	0	0	0	0	1	1
Allergy	rs9860547-A	rs2030516	chr3	188101739	0.0362	none	LPP	none	NA	none	0	0	0	0	0	0	0	0	0	0	0	0	0	0	0	0	0	0	0	0	0	0	0	0	0	0	0	0	0	0	0	0	0
Allergy	rs9860547-A	rs4686955	chr3	188106379	0.0362	none	LPP	none	NA	B_Cell_Centroblast	0	0	0	0	0	0	0	0	0	0	1	1	1	1	0	1	0	1	1	0	1	0	0	0	1	0	1	1	1	0	1	1	1
Allergy	rs9860547-A	rs56046601	chr3	188108642	0.0362	none	LPP	none	NA	adult_CD20	1	1	1	1	1	1	1	1	1	1	1	1	1	1	1	1	0	1	1	1	1	1	0	1	1	1	1	1	1	1	1	1	1
Allergy	rs9860547-A	rs7613192	chr3	188109833	0.0362	none	LPP	none	NA	adult_CD20	0	1	1	1	1	1	1	0	0	0	1	1	1	1	1	1	0	1	1	1	1	0	0	1	1	1	1	1	0	1	1	1	1
Allergy	rs9860547-A	rs11709294	chr3	188098035	0.0334	none	LPP	none	NA	adult_CD20	0	0	0	0	0	0	0	0	1	0	1	0	0	0	0	1	0	1	1	0	1	0	0	1	0	1	1	1	0	1	1	0	1
Allergy	rs9860547-A	rs11706429	chr3	188099242	0.0334	none	LPP	none	NA	adult_CD20	0	0	0	0	0	0	0	0	1	0	1	0	0	0	0	1	0	1	1	0	1	0	0	1	0	1	1	1	0	1	1	0	1
Allergy	rs9860547-A	rs1915930	chr3	188100256	0.0334	none	LPP	none	NA	none	0	0	0	0	0	0	0	0	0	0	0	0	0	0	0	0	0	0	0	0	0	0	0	0	0	0	0	0	0	0	0	0	0
Allergy	rs2101521-A	rs2101521	chr4	38811551	0.6568	none	none	none	NA	none	0	0	0	0	0	0	0	0	0	0	0	0	0	0	0	0	0	0	0	0	0	0	0	0	0	0	0	0	0	0	0	0	0
Allergy	rs2101521-A	rs9306967	chr4	38807911	0.0908	none	none	none	NA	B_Cell_Centroblast	1	1	1	1	1	1	1	1	1	1	1	1	1	1	1	1	0	1	1	1	1	1	0	1	1	1	0	1	0	1	1	1	1
Allergy	rs2101521-A	rs17616434	chr4	38812876	0.0307	none	none	none	NA	none	0	0	0	0	0	0	0	0	0	0	0	0	0	0	0	0	0	0	0	0	0	0	0	0	0	0	0	0	0	0	0	0	0
Allergy	rs17388568-A	rs17388568	chr4	123329362	0.1563	none	ADAD1	none	NA	none	0	0	0	0	0	0	0	0	0	0	0	0	0	0	0	0	0	0	0	0	0	0	0	0	0	0	0	0	0	0	0	0	0
Allergy	rs17388568-A	rs35914000	chr4	123355923	0.0613	none	none	none	NA	none	0	0	0	0	0	0	0	0	0	0	0	0	0	0	0	0	0	0	0	0	0	0	0	0	0	0	0	0	0	0	0	0	0
Allergy	rs17388568-A	rs59867199	chr4	123452231	0.0525	none	none	none	NA	none	0	0	0	0	0	0	0	0	0	0	0	0	0	0	0	0	0	0	0	0	0	0	0	0	0	0	0	0	0	0	0	0	0
Allergy	rs17388568-A	rs2069772	chr4	123373133	0.049	none	IL2	none	NA	CD25-_IL17-_Th_stim_MACS	0	0	0	0	0	0	0	0	0	0	1	1	0	0	0	0	0	0	0	0	1	0	0	0	0	0	0	0	0	0	0	0	0
Allergy	rs17388568-A	rs72669165	chr4	123460115	0.0456	none	none	none	NA	CD25-_IL17-_Th_stim_MACS	0	0	0	0	0	0	0	0	0	0	1	1	1	0	0	0	0	0	0	0	0	0	0	0	0	0	0	0	0	0	0	0	0
Allergy	rs17388568-A	rs72669172	chr4	123472816	0.0426	none	none	none	NA	none	0	0	0	0	0	0	0	0	0	0	0	0	0	0	0	0	0	0	0	0	0	0	0	0	0	0	0	0	0	0	0	0	0
Allergy	rs17388568-A	rs45485691	chr4	123475979	0.0426	none	none	none	NA	Th1	0	0	0	0	0	0	0	0	0	0	1	0	1	1	0	0	1	0	0	0	1	0	0	0	0	0	0	0	0	0	0	0	0
Allergy	rs17388568-A	rs45454992	chr4	123398148	0.0402	none	none	none	NA	none	0	0	0	0	0	0	0	0	0	0	0	0	0	0	0	0	0	0	0	0	0	0	0	0	0	0	0	0	0	0	0	0	0
Allergy	rs17388568-A	rs7693745	chr4	123235583	0.0374	none	KIAA1109	none	NA	none	0	0	0	0	0	0	0	0	0	0	0	0	0	0	0	0	0	0	0	0	0	0	0	0	0	0	0	0	0	0	0	0	0
Allergy	rs17388568-A	rs11729811	chr4	123471665	0.0353	none	none	none	NA	none	0	0	0	0	0	0	0	0	0	0	0	0	0	0	0	0	0	0	0	0	0	0	0	0	0	0	0	0	0	0	0	0	0
Allergy	rs17388568-A	rs146583707	chr4	123492417	0.0353	none	none	none	NA	none	0	0	0	0	0	0	0	0	0	0	0	0	0	0	0	0	0	0	0	0	0	0	0	0	0	0	0	0	0	0	0	0	0
Allergy	rs17388568-A	rs45605540	chr4	123141054	0.0332	none	KIAA1109	none	NA	none	0	0	0	0	0	0	0	0	0	0	0	0	0	0	0	0	0	0	0	0	0	0	0	0	0	0	0	0	0	0	0	0	0
Allergy	rs7720838-G	rs7720838	chr5	40486896	0.3048	none	none	none	NA	adult_CD14	0	0	1	0	1	1	1	1	1	1	1	1	1	1	1	1	1	1	1	1	1	1	1	1	1	1	0	1	1	1	1	1	1
Allergy	rs7720838-G	rs7725052	chr5	40487270	0.2038	none	none	none	NA	adult_CD14	0	0	1	0	1	1	1	1	1	1	1	1	1	1	1	1	1	1	1	1	1	1	1	1	1	1	0	1	1	1	1	1	1
Allergy	rs7720838-G	rs10440635	chr5	40490790	0.2038	none	none	none	NA	Th1	0	0	0	0	0	0	0	0	1	1	1	1	1	1	1	0	1	1	1	1	1	1	0	0	0	1	0	0	0	0	1	0	0
Allergy	rs7720838-G	rs9283753	chr5	40490609	0.1719	none	none	none	NA	Th1	0	0	0	0	0	0	0	0	0	1	1	1	1	1	1	1	1	1	1	1	1	1	0	0	0	1	0	0	0	0	0	0	0
Allergy	rs7720838-G	rs7714574	chr5	40492655	0.0697	none	none	none	NA	adult_CD14	0	0	0	0	0	0	0	1	0	0	1	1	1	1	1	1	1	1	1	1	1	0	1	0	1	0	0	1	0	0	0	0	0
Allergy	rs1438673-C	rs1438673	chr5	110467499	0.7364	none	none	none	NA	none	0	0	0	0	0	0	0	0	0	0	0	0	0	0	0	0	0	0	0	0	0	0	0	0	0	0	0	0	0	0	0	0	0
Allergy	rs1438673-C	rs6594499	chr5	110470137	0.1722	none	none	none	NA	NH-Osteoblast	1	0	0	0	0	0	0	0	0	0	0	1	0	0	1	0	0	0	0	0	0	0	0	0	0	1	0	1	0	0	1	1	1
Allergy	rs6473223-T	rs6473223	chr8	81268155	0.0491	none	none	none	NA	none	0	0	0	0	0	0	0	0	0	0	0	0	0	0	0	0	0	0	0	0	0	0	0	0	0	0	0	0	0	0	0	0	0
Allergy	rs6473223-T	rs1911715	chr8	81265828	0.0491	none	none	none	NA	none	0	0	0	0	0	0	0	0	0	0	0	0	0	0	0	0	0	0	0	0	0	0	0	0	0	0	0	0	0	0	0	0	0
Allergy	rs6473223-T	rs13274471	chr8	81268764	0.0491	none	none	none	NA	none	0	0	0	0	0	0	0	0	0	0	0	0	0	0	0	0	0	0	0	0	0	0	0	0	0	0	0	0	0	0	0	0	0
Allergy	rs6473223-T	rs13275219	chr8	81259826	0.0348	none	none	none	NA	CD25-_IL17-_Th_stim_MACS	0	0	0	0	0	0	0	0	1	1	1	1	1	1	1	1	0	1	1	1	1	0	0	0	1	0	0	0	1	0	0	0	0
Allergy	rs7032572-G	rs7032572	chr9	6172380	0.324	none	none	none	NA	none	0	0	0	0	0	0	0	0	0	0	0	0	0	0	0	0	0	0	0	0	0	0	0	0	0	0	0	0	0	0	0	0	0
Allergy	rs7032572-G	rs72699188	chr9	6176871	0.1302	none	none	none	NA	none	0	0	0	0	0	0	0	0	0	0	0	0	0	0	0	0	0	0	0	0	0	0	0	0	0	0	0	0	0	0	0	0	0
Allergy	rs7032572-G	rs72699186	chr9	6175855	0.0977	none	none	none	NA	none	0	0	0	0	0	0	0	0	0	0	0	0	0	0	0	0	0	0	0	0	0	0	0	0	0	0	0	0	0	0	0	0	0
Allergy	rs7032572-G	rs10975468	chr9	6177302	0.0977	none	none	none	NA	none	0	0	0	0	0	0	0	0	0	0	0	0	0	0	0	0	0	0	0	0	0	0	0	0	0	0	0	0	0	0	0	0	0
Allergy	rs7032572-G	rs9775039	chr9	6177453	0.0977	none	none	none	NA	none	0	0	0	0	0	0	0	0	0	0	0	0	0	0	0	0	0	0	0	0	0	0	0	0	0	0	0	0	0	0	0	0	0
Allergy	rs7032572-G	rs10975479	chr9	6197377	0.0546	none	none	none	NA	none	0	0	0	0	0	0	0	0	0	0	0	0	0	0	0	0	0	0	0	0	0	0	0	0	0	0	0	0	0	0	0	0	0
Allergy	rs7032572-G	rs144829310	chr9	6208030	0.0443	none	none	none	NA	none	0	0	0	0	0	0	0	0	0	0	0	0	0	0	0	0	0	0	0	0	0	0	0	0	0	0	0	0	0	0	0	0	0
Allergy	rs7032572-G	rs1342326	chr9	6190076	0.0441	none	none	none	NA	none	0	0	0	0	0	0	0	0	0	0	0	0	0	0	0	0	0	0	0	0	0	0	0	0	0	0	0	0	0	0	0	0	0
Allergy	rs7032572-G	rs1929995	chr9	6201163	0.0368	none	none	none	NA	none	0	0	0	0	0	0	0	0	0	0	0	0	0	0	0	0	0	0	0	0	0	0	0	0	0	0	0	0	0	0	0	0	0
Allergy	rs7032572-G	rs72699191	chr9	6211813	0.0335	none	none	none	NA	none	0	0	0	0	0	0	0	0	0	0	0	0	0	0	0	0	0	0	0	0	0	0	0	0	0	0	0	0	0	0	0	0	0
Allergy	rs7032572-G	rs12349858	chr9	6185295	0.0277	none	none	none	NA	GM12878	0	0	0	0	0	0	0	0	0	0	0	0	0	0	0	0	0	0	0	1	0	0	0	0	0	0	0	0	0	0	0	0	0
Allergy	rs962993-T	rs962993	chr10	9053132	0.0983	none	none	none	NA	Th2	0	0	0	0	0	0	0	1	1	1	1	0	1	0	1	0	0	0	0	0	0	0	0	0	0	0	0	0	0	0	1	1	1
Allergy	rs962993-T	rs962992	chr10	9053073	0.0983	none	none	none	NA	Th2	0	0	0	0	0	0	0	1	1	1	1	0	1	0	1	0	0	0	0	0	0	0	0	0	0	0	0	0	0	0	1	1	1
Allergy	rs962993-T	rs1775553	chr10	9054325	0.0983	none	none	none	NA	Th2	0	0	0	0	0	0	0	0	1	1	1	0	0	0	1	1	1	0	0	0	1	0	0	0	1	0	1	0	0	0	1	1	1
Allergy	rs962993-T	rs1775554	chr10	9054340	0.0983	none	none	none	NA	Th2	0	0	0	0	0	0	0	0	1	1	1	0	0	0	1	1	1	0	0	0	1	0	0	0	1	0	1	0	0	0	1	1	1
Allergy	rs962993-T	rs1775555	chr10	9054646	0.0983	none	none	none	NA	Th2	0	0	0	0	0	0	0	0	1	1	1	0	0	0	1	1	1	0	0	0	1	0	0	0	1	0	1	0	0	0	1	1	1
Allergy	rs962993-T	rs1663687	chr10	9054787	0.0983	none	none	none	NA	Th2	0	0	0	0	0	0	0	0	1	1	1	0	0	0	1	1	1	0	0	0	1	0	0	0	1	0	1	0	0	0	1	1	1
Allergy	rs962993-T	rs1663680	chr10	9057245	0.0983	none	none	none	NA	Th2	0	0	0	0	0	0	0	1	1	1	1	0	1	0	1	0	1	0	0	1	0	0	0	0	0	0	0	0	0	0	1	0	0
Allergy	rs962993-T	rs1031163	chr10	9057422	0.0983	none	none	none	NA	Th2	0	0	0	0	0	0	0	1	1	1	1	0	1	0	1	0	1	0	0	1	0	0	0	0	0	0	0	0	0	0	1	0	0
Allergy	rs962993-T	rs1444782	chr10	9058671	0.0983	none	none	none	NA	Th2	0	0	0	0	0	0	0	0	1	1	1	0	0	0	1	0	1	0	0	0	1	0	0	0	0	0	0	0	0	0	0	0	0
Allergy	rs962993-T	rs2197415	chr10	9062856	0.0529	none	none	none	NA	Th2	0	0	0	0	0	0	0	0	1	1	1	0	0	0	1	0	0	0	0	0	0	0	0	0	0	0	0	0	0	0	0	0	0
Allergy	rs962993-T	rs148841839	chr10	9055682	0.0478	none	none	none	NA	Th2	0	0	0	0	0	0	0	0	1	1	0	1	0	0	1	0	1	0	0	0	0	0	0	0	0	0	0	0	0	0	1	0	1
Allergy	rs2155219-T	rs2155219	chr11	76299194	0.4241	none	none	none	NA	CD25+_CD127-_Treg	1	0	1	1	1	1	1	1	1	1	1	1	1	1	1	0	0	1	1	1	1	1	0	1	1	1	0	1	0	1	0	1	0
Allergy	rs2155219-T	rs10160518	chr11	76296671	0.1919	none	none	none	NA	none	0	0	0	0	0	0	0	0	0	0	0	0	0	0	0	0	0	0	0	0	0	0	0	0	0	0	0	0	0	0	0	0	0
Allergy	rs2155219-T	rs34455012	chr11	76299844	0.1356	none	none	none	NA	Th2	1	1	1	1	1	1	1	0	1	1	1	1	1	1	1	0	1	1	1	1	1	1	0	1	1	1	1	1	1	1	1	1	0
Allergy	rs2155219-T	rs7930763	chr11	76302073	0.0805	none	none	none	NA	Th2	0	0	0	0	0	0	0	0	1	1	0	1	1	1	1	0	0	0	0	0	0	0	0	1	1	0	0	0	0	1	0	0	0
Allergy	rs2155219-T	rs4494327	chr11	76294836	0.0803	none	none	none	NA	none	0	0	0	0	0	0	0	0	0	0	0	0	0	0	0	0	0	0	0	0	0	0	0	0	0	0	0	0	0	0	0	0	0
Allergy	rs1998359-G	rs1998359	chr14	38077148	0.1285	none	none	none	NA	none	0	0	0	0	0	0	0	0	0	0	0	0	0	0	0	0	0	0	0	0	0	0	0	0	0	0	0	0	0	0	0	0	0
Allergy	rs1998359-G	rs28802081	chr14	38082531	0.0544	none	C14orf25	none	NA	none	0	0	0	0	0	0	0	0	0	0	0	0	0	0	0	0	0	0	0	0	0	0	0	0	0	0	0	0	0	0	0	0	0
Allergy	rs1998359-G	rs61987975	chr14	38085923	0.0497	none	C14orf25	none	NA	HepG2	0	0	0	0	0	0	0	0	0	0	0	0	0	1	0	0	0	0	0	0	0	0	0	0	0	0	1	0	0	0	0	0	0
Allergy	rs1998359-G	rs61987976	chr14	38088354	0.0497	none	C14orf25	none	NA	HepG2	0	0	0	0	0	0	0	0	0	0	0	0	0	0	0	0	0	0	0	0	0	0	0	0	0	0	1	0	0	0	0	0	0
Allergy	rs1998359-G	rs17179288	chr14	38088359	0.0497	none	C14orf25	none	NA	HepG2	0	0	0	0	0	0	0	0	0	0	0	0	0	0	0	0	0	0	0	0	0	0	0	0	0	0	1	0	0	0	0	0	0
Allergy	rs1998359-G	rs177831	chr14	38093504	0.0458	none	C14orf25	none	NA	none	0	0	0	0	0	0	0	0	0	0	0	0	0	0	0	0	0	0	0	0	0	0	0	0	0	0	0	0	0	0	0	0	0
Allergy	rs1998359-G	rs61987980	chr14	38094438	0.0458	none	C14orf25	none	NA	HepG2	0	0	0	0	0	0	0	0	0	0	0	0	0	0	0	0	1	0	0	0	1	0	0	0	0	0	1	0	0	0	0	0	0
Allergy	rs1998359-G	rs111914382	chr14	38097001	0.0423	none	C14orf25	none	NA	HepG2	0	0	0	0	0	0	0	0	0	0	0	0	0	1	0	0	0	0	0	0	0	0	0	0	0	0	1	0	0	0	0	0	0
Allergy	rs1998359-G	rs177836	chr14	38099731	0.0423	none	C14orf25	none	NA	none	0	0	0	0	0	0	0	0	0	0	0	0	0	0	0	0	0	0	0	0	0	0	0	0	0	0	0	0	0	0	0	0	0
Allergy	rs1998359-G	rs7151179	chr14	38078640	0.042	none	none	none	NA	HepG2	0	0	0	0	0	0	0	0	0	1	0	0	1	1	0	0	1	0	0	0	1	0	0	0	0	0	1	0	0	0	0	0	0
Allergy	rs1998359-G	rs61988002	chr14	38104787	0.0366	none	C14orf25	none	NA	none	0	0	0	0	0	0	0	0	0	0	0	0	0	0	0	0	0	0	0	0	0	0	0	0	0	0	0	0	0	0	0	0	0
Allergy	rs1998359-G	rs7151000	chr14	38078588	0.0364	none	none	none	NA	HepG2	0	0	0	0	0	0	0	0	0	1	0	0	1	1	0	0	1	0	0	0	1	0	0	0	0	0	1	0	0	0	0	0	0
Allergy	rs1998359-G	rs76818557	chr14	38083949	0.0364	none	C14orf25	none	NA	none	0	0	0	0	0	0	0	0	0	0	0	0	0	0	0	0	0	0	0	0	0	0	0	0	0	0	0	0	0	0	0	0	0
Allergy	rs1998359-G	rs61987973	chr14	38084948	0.0319	none	C14orf25	none	NA	HepG2	0	0	0	0	0	0	0	0	0	1	0	0	0	0	0	0	0	0	0	0	0	0	0	0	0	0	1	0	0	0	0	0	0
Allergy	rs1998359-G	rs138902382	chr14	38095403	0.0318	none	C14orf25	none	NA	HepG2	0	0	0	0	0	0	0	0	0	0	0	0	0	1	0	0	0	0	0	0	0	0	0	0	0	0	1	0	0	0	0	0	0
Allergy	rs1998359-G	rs61987999	chr14	38099240	0.0297	none	C14orf25	none	NA	none	0	0	0	0	0	0	0	0	0	0	0	0	0	0	0	0	0	0	0	0	0	0	0	0	0	0	0	0	0	0	0	0	0
Allergy	rs17228058-G	rs17228058	chr15	67450305	0.32	none	SMAD3	none	NA	colonic_mucosa	1	0	1	0	0	0	0	1	1	1	1	1	1	1	1	1	0	1	1	1	0	1	1	1	1	1	1	1	1	1	1	1	0
Allergy	rs17228058-G	rs56375023	chr15	67448363	0.1505	none	SMAD3	none	NA	none	0	0	0	0	0	0	0	0	0	0	0	0	0	0	0	0	0	0	0	0	0	0	0	0	0	0	0	0	0	0	0	0	0
Allergy	rs17228058-G	rs56062135	chr15	67455630	0.15	none	SMAD3	none	NA	NH-Osteoblast	0	1	0	0	0	1	1	1	1	1	1	1	1	1	1	0	1	1	1	1	0	0	1	1	0	1	1	0	0	1	1	1	1
Allergy	rs17228058-G	rs17293632	chr15	67442596	0.0817	none	SMAD3	none	NA	NH-Osteoblast	1	1	1	1	1	1	1	1	1	1	1	1	1	1	1	1	1	1	1	1	0	1	1	1	1	1	1	1	1	1	1	1	1
Allergy	rs17228058-G	rs72743461	chr15	67441750	0.0695	none	SMAD3	none	NA	NH-Osteoblast	1	1	1	1	1	1	1	1	1	1	1	1	1	1	1	1	1	1	1	1	1	1	1	1	1	1	1	1	1	1	1	1	1
Allergy	rs17228058-G	rs72743477	chr15	67464291	0.0636	none	SMAD3	none	NA	CD25-_IL17+_Th17_stim	0	1	0	0	0	0	0	1	1	1	1	1	1	1	0	0	1	1	1	0	0	1	0	0	1	1	1	1	1	1	1	1	0
Allergy	rs17228058-G	rs72743482	chr15	67466599	0.0546	none	SMAD3	none	NA	NH-Osteoblast	0	1	0	0	0	1	0	1	1	1	1	1	1	1	1	0	0	1	1	1	0	1	1	1	1	1	1	1	1	1	1	1	0
Allergy	rs7203459-C	rs7203459	chr16	11230703	0.133	none	CLEC16A	none	NA	Th2	0	0	0	0	0	1	0	0	1	0	1	0	1	1	1	0	1	1	0	1	0	0	1	0	1	1	0	1	1	1	1	1	0
Allergy	rs7203459-C	rs62026376	chr16	11228712	0.0922	none	CLEC16A	none	NA	AdiposeNuclei	0	1	1	1	1	1	1	0	1	1	1	0	1	0	1	1	1	1	1	0	0	0	1	1	1	1	1	1	1	1	1	1	1
Allergy	rs7203459-C	rs62026377	chr16	11229128	0.0922	none	CLEC16A	none	NA	AdiposeNuclei	1	1	1	1	1	1	1	0	0	0	0	1	1	0	1	0	0	1	0	1	0	0	1	1	1	1	1	1	1	1	1	1	1
Allergy	rs7203459-C	rs36045143	chr16	11224966	0.07	none	CLEC16A	none	NA	Th2	0	0	1	1	1	1	1	0	0	1	0	1	1	1	1	1	1	0	0	1	0	1	1	1	1	1	0	1	1	1	1	0	0
Allergy	rs7203459-C	rs2241099	chr16	11225064	0.07	none	CLEC16A	none	NA	Th2	0	0	1	1	1	1	1	0	0	1	0	1	1	1	1	1	1	0	0	1	0	1	1	1	1	1	0	1	1	1	1	0	0
Allergy	rs7203459-C	rs12919828	chr16	11226779	0.07	none	CLEC16A	none	NA	Th2	0	1	0	1	1	1	1	1	0	1	1	1	1	1	1	1	1	0	0	1	1	1	1	1	1	1	0	1	1	1	1	1	1
Allergy	rs7203459-C	rs35441874	chr16	11213021	0.0575	none	CLEC16A	none	NA	none	0	0	0	0	0	0	0	0	0	0	0	0	0	0	0	0	0	0	0	0	0	0	0	0	0	0	0	0	0	0	0	0	0
Allergy	rs7203459-C	rs12919732	chr16	11235123	0.0575	none	CLEC16A	none	NA	Th2	0	0	1	0	0	0	0	0	1	0	0	0	1	1	1	0	1	0	0	0	0	0	1	0	0	0	0	0	1	1	1	0	0
Allergy	rs7203459-C	rs34540843	chr16	11221287	0.0452	none	CLEC16A	none	NA	Th2	0	0	0	0	0	0	0	1	1	1	1	0	0	0	1	1	1	0	0	1	0	1	1	0	0	0	0	0	0	1	0	0	0
Allergy	rs7203459-C	rs62026379	chr16	11241806	0.0421	none	CLEC16A	none	NA	Pancreatic_Islets	0	1	0	0	0	0	0	0	0	0	1	0	1	1	1	0	1	0	1	1	0	0	1	0	1	0	1	0	1	1	0	0	0
Allergy	rs7203459-C	rs17673553	chr16	11241906	0.0421	none	CLEC16A	none	NA	Pancreatic_Islets	0	1	0	0	0	0	0	0	0	0	1	0	1	1	1	0	1	0	1	1	0	0	1	0	1	0	1	0	1	1	0	0	0
Allergy	rs7203459-C	rs11864680	chr16	11244194	0.0394	none	CLEC16A	none	NA	none	0	0	0	0	0	0	0	0	0	0	0	0	0	0	0	0	0	0	0	0	0	0	0	0	0	0	0	0	0	0	0	0	0
Allergy	rs7203459-C	rs12935657	chr16	11219041	0.0393	none	CLEC16A	none	NA	none	0	0	0	0	0	0	0	0	0	0	0	0	0	0	0	0	0	0	0	0	0	0	0	0	0	0	0	0	0	0	0	0	0
Allergy	rs7203459-C	rs34720006	chr16	11243455	0.0368	none	CLEC16A	none	NA	none	0	0	0	0	0	0	0	0	0	0	0	0	0	0	0	0	0	0	0	0	0	0	0	0	0	0	0	0	0	0	0	0	0
Allergy	rs2107357-A	rs2107357	chr16	27410829	0.2817	none	none	none	NA	B_Cell_Centroblast	0	0	0	0	1	0	0	1	1	1	1	0	1	1	1	1	1	1	1	1	1	0	1	0	0	0	0	1	0	0	0	1	1
Allergy	rs2107357-A	rs1119132	chr16	27403469	0.1355	none	none	none	NA	none	0	0	0	0	0	0	0	0	0	0	0	0	0	0	0	0	0	0	0	0	0	0	0	0	0	0	0	0	0	0	0	0	0
Allergy	rs2107357-A	rs9933895	chr16	27403673	0.1355	none	none	none	NA	none	0	0	0	0	0	0	0	0	0	0	0	0	0	0	0	0	0	0	0	0	0	0	0	0	0	0	0	0	0	0	0	0	0
Allergy	rs2107357-A	rs6498019	chr16	27408945	0.1355	none	none	none	NA	B_Cell_Centroblast	0	0	0	0	0	0	0	0	0	1	1	0	1	1	1	1	1	0	1	1	1	0	0	0	0	0	0	0	0	0	0	0	0
Allergy	rs2107357-A	rs1988004	chr16	27405426	0.0866	none	none	none	NA	none	0	0	0	0	0	0	0	0	0	0	0	0	0	0	0	0	0	0	0	0	0	0	0	0	0	0	0	0	0	0	0	0	0
Allergy	rs2107357-A	rs6498021	chr16	27414378	0.0497	none	IL21R	none	NA	Th0	0	0	0	0	0	1	1	1	1	1	1	1	1	1	1	1	1	1	1	1	1	1	1	1	1	0	0	1	0	0	1	1	1
Allergy	rs9303280-T	rs9303280	chr17	38074031	0.1088	none	GSDMB	none	NA	colonic_mucosa	1	0	0	0	1	0	0	1	1	1	1	1	1	1	1	1	1	1	1	1	1	0	1	1	1	1	1	1	0	0	1	0	0
Allergy	rs9303280-T	rs8065777	chr17	38072402	0.0584	none	GSDMB	none	NA	AdiposeNuclei	0	0	0	0	0	0	0	1	1	1	1	0	1	1	1	1	0	0	1	1	1	0	1	1	1	1	1	1	0	1	0	0	0
Allergy	rs9303280-T	rs1031458	chr17	38072173	0.0529	none	GSDMB	none	NA	AdiposeNuclei	0	0	0	0	0	0	0	1	1	1	1	0	1	1	1	1	0	0	1	1	1	0	1	1	1	1	1	1	0	1	0	0	0
Allergy	rs9303280-T	rs1031460	chr17	38072247	0.0484	none	GSDMB	none	NA	AdiposeNuclei	0	0	0	0	0	0	0	1	1	1	1	0	1	1	1	1	0	0	1	1	1	0	1	1	1	1	1	1	0	1	0	0	0
Allergy	rs9303280-T	rs4065275	chr17	38080865	0.0317	none	ORMDL3	none	NA	Liver1	1	1	1	1	1	1	1	1	1	1	1	1	1	1	1	1	1	1	1	1	0	1	1	1	1	1	1	1	1	1	0	1	1
Allergy	rs9303280-T	rs12603332	chr17	38082807	0.0298	none	ORMDL3	none	NA	Th1	1	1	1	1	1	1	1	1	1	1	1	1	1	1	1	1	1	1	1	1	1	1	1	1	1	1	1	1	1	1	1	1	1
Allergy	rs9303280-T	rs7221605	chr17	38070789	0.0282	none	GSDMB	none	NA	Liver1	0	0	0	0	0	0	0	0	0	1	0	0	1	1	1	1	0	0	0	1	1	0	1	1	1	1	1	1	0	0	0	1	0
Allergy	rs6021270-C	rs6021270	chr20	50141264	0.1982	none	NFATC2	none	NA	B_Cell_Centroblast	1	0	1	1	1	1	1	1	1	1	1	1	1	1	1	1	1	0	1	1	1	1	1	1	0	0	0	1	0	0	0	0	1
Allergy	rs6021270-C	rs6021268	chr20	50141141	0.093	none	NFATC2	none	NA	B_Cell_Centroblast	1	0	1	1	1	1	1	1	1	1	1	1	1	1	1	1	1	0	1	1	1	1	1	1	0	0	0	1	0	0	0	0	1
Allergy	rs6021270-C	rs6021269	chr20	50141172	0.093	none	NFATC2	none	NA	B_Cell_Centroblast	1	0	1	1	1	1	1	1	1	1	1	1	1	1	1	1	1	0	1	1	1	1	1	1	0	0	0	1	0	0	0	0	1
Allergy	rs6021270-C	rs6126249	chr20	50142623	0.093	none	NFATC2	none	NA	B_Cell_Centroblast	1	1	1	1	1	1	1	1	1	1	1	1	1	1	1	1	1	1	1	1	1	1	1	1	1	1	1	1	0	1	0	1	1
Allergy	rs6021270-C	rs6096462	chr20	50143662	0.093	none	NFATC2	none	NA	B_Cell_Centroblast	0	0	1	1	1	1	1	1	1	1	1	1	1	1	1	1	1	0	1	1	1	1	1	1	0	1	1	0	0	0	0	0	1
Allergy	rs6021270-C	rs77263937	chr20	50144303	0.093	none	NFATC2	none	NA	CD25-_IL17+_Th17_stim	0	0	0	0	0	1	1	1	1	1	1	1	1	1	1	1	1	0	1	1	1	1	1	1	1	0	0	0	0	1	0	1	1
Allergy	rs6021270-C	rs6123048	chr20	50147400	0.0668	none	NFATC2	none	NA	CD25-_IL17+_Th17_stim	0	1	1	1	1	1	1	1	1	1	1	1	1	1	1	1	1	0	1	1	1	1	1	1	1	1	1	1	0	1	1	1	1
Allergy	rs6021270-C	rs76880593	chr20	50147472	0.0668	none	NFATC2	none	NA	CD25-_IL17+_Th17_stim	0	1	1	1	1	1	1	1	1	1	1	1	1	1	1	1	1	0	1	1	1	1	1	1	1	1	1	1	0	1	1	1	1
Allergy	rs6021270-C	rs6096463	chr20	50148037	0.0668	none	NFATC2	none	NA	CD25-_IL17+_Th17_stim	0	1	1	1	1	1	1	1	1	1	1	1	1	1	1	1	1	0	1	1	1	1	1	1	1	1	1	1	0	1	1	1	1
Allergy	rs6021270-C	rs3746420	chr20	50140627	0.0514	synonymous	NFATC2	none	NA	none	0	0	0	0	0	0	0	0	0	0	0	0	0	0	0	0	0	0	0	0	0	0	0	0	0	0	0	0	0	0	0	0	0
Primary_sclerosing_cholangitis	rs3748816-A	rs3748816	chr1	2526746	0.0508	missense	MMEL1	none	NA	none	0	0	0	0	0	0	0	0	0	0	0	0	0	0	0	0	0	0	0	0	0	0	0	0	0	0	0	0	0	0	0	0	0
Primary_sclerosing_cholangitis	rs3748816-A	rs2764840	chr1	2529437	0.0328	none	MMEL1	none	NA	none	0	0	0	0	0	0	0	0	0	0	0	0	0	0	0	0	0	0	0	0	0	0	0	0	0	0	0	0	0	0	0	0	0
Primary_sclerosing_cholangitis	rs3748816-A	rs745367	chr1	2524457	0.0324	none	MMEL1	none	NA	CD25-_CD45RA+_naive	0	0	0	0	0	0	0	1	1	1	1	0	1	0	1	0	0	0	0	0	0	0	0	1	0	0	0	0	0	0	0	0	0
Primary_sclerosing_cholangitis	rs3748816-A	rs3828154	chr1	2524943	0.0324	none	MMEL1	none	NA	none	0	0	0	0	0	0	0	0	0	0	0	0	0	0	0	0	0	0	0	0	0	0	0	0	0	0	0	0	0	0	0	0	0
Primary_sclerosing_cholangitis	rs3748816-A	rs3748817	chr1	2525665	0.0324	none	MMEL1	none	NA	none	0	0	0	0	0	0	0	0	0	0	0	0	0	0	0	0	0	0	0	0	0	0	0	0	0	0	0	0	0	0	0	0	0
Primary_sclerosing_cholangitis	rs3748816-A	rs2764845	chr1	2528999	0.0324	none	MMEL1	none	NA	none	0	0	0	0	0	0	0	0	0	0	0	0	0	0	0	0	0	0	0	0	0	0	0	0	0	0	0	0	0	0	0	0	0
Primary_sclerosing_cholangitis	rs3748816-A	rs2843403	chr1	2529097	0.0324	none	MMEL1	none	NA	none	0	0	0	0	0	0	0	0	0	0	0	0	0	0	0	0	0	0	0	0	0	0	0	0	0	0	0	0	0	0	0	0	0
Primary_sclerosing_cholangitis	rs3748816-A	rs2764841	chr1	2529360	0.0324	none	MMEL1	none	NA	none	0	0	0	0	0	0	0	0	0	0	0	0	0	0	0	0	0	0	0	0	0	0	0	0	0	0	0	0	0	0	0	0	0
Primary_sclerosing_cholangitis	rs3748816-A	rs6667564	chr1	2520302	0.0295	none	FAM213B	none	NA	none	0	0	0	0	0	0	0	0	0	0	0	0	0	0	0	0	0	0	0	0	0	0	0	0	0	0	0	0	0	0	0	0	0
Primary_sclerosing_cholangitis	rs7426056-A	rs7426056	chr2	204612058	0.2066	none	none	none	NA	Th2	0	0	0	0	0	0	0	1	1	1	1	1	1	1	1	1	1	0	0	0	1	0	0	0	0	0	1	0	0	0	1	1	0
Primary_sclerosing_cholangitis	rs7426056-A	rs7422494	chr2	204611807	0.2066	none	none	none	NA	Th2	0	0	0	0	0	0	0	1	1	1	1	1	1	1	1	1	1	0	0	0	1	0	0	0	0	0	1	0	0	0	1	1	0
Primary_sclerosing_cholangitis	rs7426056-A	rs7588874	chr2	204614508	0.2066	none	none	none	NA	Th2	0	0	0	0	0	0	0	1	1	1	1	1	1	1	1	1	1	0	0	0	1	0	0	0	0	0	0	0	0	0	0	0	0
Primary_sclerosing_cholangitis	rs7426056-A	rs1980422	chr2	204610396	0.1397	none	none	none	NA	Th2	0	0	0	0	0	0	0	1	1	1	1	1	1	1	1	0	0	0	0	1	1	0	0	1	0	0	1	0	0	0	1	1	0
Primary_sclerosing_cholangitis	rs7426056-A	rs1980421	chr2	204610004	0.1073	none	none	none	NA	Th2	0	0	0	0	0	0	0	1	1	1	1	1	1	1	1	1	0	0	0	0	1	0	0	0	0	0	0	0	0	0	1	1	1
Primary_sclerosing_cholangitis	rs7426056-A	rs67895606	chr2	204615889	0.0451	none	none	none	NA	CD25+_CD127-_Treg	0	0	0	0	0	0	0	1	1	1	1	1	1	1	1	0	1	0	0	0	0	0	0	0	1	0	0	0	0	0	0	0	0
Primary_sclerosing_cholangitis	rs3197999	rs3197999	chr3	49721532	0.2688	missense	MST1	none	NA	kidney	1	1	1	1	1	1	1	1	0	1	1	0	1	0	0	0	1	0	0	0	0	0	1	1	0	0	1	1	1	1	1	0	0
Primary_sclerosing_cholangitis	rs3197999	rs9822268	chr3	49719729	0.0455	none	APEH	none	NA	none	0	0	0	0	0	0	0	0	0	0	0	0	0	0	0	0	0	0	0	0	0	0	0	0	0	0	0	0	0	0	0	0	0
Primary_sclerosing_cholangitis	rs3197999	rs9823546	chr3	49705512	0.0448	utr3	BSN	none	NA	Liver1	1	1	1	1	1	1	1	1	0	0	0	0	0	0	0	0	0	0	0	0	0	0	0	0	1	0	1	1	1	1	1	0	0
Primary_sclerosing_cholangitis	rs3197999	rs9812791	chr3	49682311	0.0441	none	BSN	none	NA	mid_frontal_lobe	1	1	1	1	1	1	1	0	0	0	0	1	0	0	0	0	0	0	0	0	1	0	0	0	0	0	0	1	1	0	1	0	0
Primary_sclerosing_cholangitis	rs3197999	rs9858542	chr3	49701983	0.0441	synonymous	BSN	none	NA	inferior_temporal_lobe	1	1	1	1	1	1	1	0	1	0	0	0	0	1	0	0	0	1	0	0	1	0	0	0	1	0	1	1	1	1	0	0	0
Primary_sclerosing_cholangitis	rs3197999	rs11130213	chr3	49712297	0.0441	none	APEH	none	NA	CD25-_CD45RA+_naive	1	1	1	1	1	1	1	1	1	1	1	1	1	1	1	1	1	1	1	1	1	1	1	1	1	1	1	1	1	1	1	1	1
Primary_sclerosing_cholangitis	rs3197999	rs2172252	chr3	49678307	0.044	none	BSN	none	NA	anterior_caudate	1	1	1	1	0	1	1	0	0	1	0	0	1	0	0	0	0	0	0	0	0	0	1	0	0	0	0	1	1	0	0	0	0
Primary_sclerosing_cholangitis	rs3197999	rs4283605	chr3	49678651	0.0436	none	BSN	none	NA	anterior_caudate	1	1	1	1	0	1	1	0	0	1	0	0	1	0	0	0	0	0	0	0	0	0	1	0	0	0	0	1	1	0	0	0	0
Primary_sclerosing_cholangitis	rs3197999	rs9882740	chr3	49702484	0.0416	none	BSN	none	NA	inferior_temporal_lobe	1	1	1	1	1	1	1	0	1	0	0	0	0	1	0	0	0	1	0	0	1	0	0	0	1	0	1	1	1	1	0	0	0
Primary_sclerosing_cholangitis	rs3197999	rs34762726	chr3	49689210	0.0388	missense	BSN	none	NA	none	0	0	0	0	0	0	0	0	0	0	0	0	0	0	0	0	0	0	0	0	0	0	0	0	0	0	0	0	0	0	0	0	0
Primary_sclerosing_cholangitis	rs3197999	rs6770670	chr3	49686682	0.0384	none	BSN	none	NA	Pancreatic_Islets	1	1	1	1	1	1	1	1	0	0	0	1	1	0	0	0	1	1	0	1	0	1	1	0	1	0	1	0	1	1	0	0	0
Primary_sclerosing_cholangitis	rs3197999	rs11709525	chr3	49690496	0.0382	synonymous	BSN	none	NA	none	0	0	0	0	0	0	0	0	0	0	0	0	0	0	0	0	0	0	0	0	0	0	0	0	0	0	0	0	0	0	0	0	0
Primary_sclerosing_cholangitis	rs13140464-C	rs13140464	chr4	123499745	0.2043	none	none	none	NA	Th1	1	0	1	1	1	0	1	1	1	1	1	1	1	1	1	1	1	1	1	1	0	0	0	1	1	1	0	0	0	0	1	1	1
Primary_sclerosing_cholangitis	rs13140464-C	rs2069778	chr4	123376135	0.1509	none	IL2	none	NA	CD25-_IL17-_Th_stim_MACS	0	0	0	0	0	0	0	1	1	1	1	1	1	1	1	1	0	0	1	0	0	0	0	0	0	0	0	0	0	0	0	0	0
Primary_sclerosing_cholangitis	rs13140464-C	rs45545833	chr4	123392504	0.1145	none	none	none	NA	none	0	0	0	0	0	0	0	0	0	0	0	0	0	0	0	0	0	0	0	0	0	0	0	0	0	0	0	0	0	0	0	0	0
Primary_sclerosing_cholangitis	rs13140464-C	rs34566917	chr4	123339756	0.113	none	ADAD1	none	NA	none	0	0	0	0	0	0	0	0	0	0	0	0	0	0	0	0	0	0	0	0	0	0	0	0	0	0	0	0	0	0	0	0	0
Primary_sclerosing_cholangitis	rs13140464-C	rs13139130	chr4	123293508	0.0823	none	none	none	NA	none	0	0	0	0	0	0	0	0	0	0	0	0	0	0	0	0	0	0	0	0	0	0	0	0	0	0	0	0	0	0	0	0	0
Primary_sclerosing_cholangitis	rs13140464-C	rs6822844	chr4	123509421	0.0793	none	none	none	NA	inferior_temporal_lobe	1	1	1	1	1	1	1	0	1	0	0	0	1	0	1	0	1	1	0	0	1	0	0	0	0	0	0	0	0	0	1	0	0
Primary_sclerosing_cholangitis	rs13140464-C	rs13132308	chr4	123551114	0.0653	none	BC045668	none	NA	none	0	0	0	0	0	0	0	0	0	0	0	0	0	0	0	0	0	0	0	0	0	0	0	0	0	0	0	0	0	0	0	0	0
Primary_sclerosing_cholangitis	rs13140464-C	rs45472292	chr4	123443984	0.036	none	none	none	NA	none	0	0	0	0	0	0	0	0	0	0	0	0	0	0	0	0	0	0	0	0	0	0	0	0	0	0	0	0	0	0	0	0	0
Primary_sclerosing_cholangitis	rs13140464-C	rs35439287	chr4	123358961	0.0355	none	none	none	NA	none	0	0	0	0	0	0	0	0	0	0	0	0	0	0	0	0	0	0	0	0	0	0	0	0	0	0	0	0	0	0	0	0	0
Primary_sclerosing_cholangitis	rs56258221-G	rs56258221	chr6	91030441	0.2067	none	none	none	NA	CD25-_IL17-_Th_stim_MACS	0	0	0	0	0	0	0	1	0	1	1	1	1	1	1	1	1	0	1	0	1	0	1	0	0	0	0	0	0	0	0	0	0
Primary_sclerosing_cholangitis	rs56258221-G	rs72928086	chr6	91029762	0.2067	none	none	none	NA	CD25-_IL17-_Th_stim_MACS	0	0	0	0	0	0	0	1	0	1	1	1	1	1	1	1	1	0	1	0	1	0	1	0	0	0	0	0	0	0	0	0	0
Primary_sclerosing_cholangitis	rs56258221-G	rs72928089	chr6	91034318	0.1459	none	none	none	NA	none	0	0	0	0	0	0	0	0	0	0	0	0	0	0	0	0	0	0	0	0	0	0	0	0	0	0	0	0	0	0	0	0	0
Primary_sclerosing_cholangitis	rs56258221-G	rs6937337	chr6	91032960	0.1163	none	none	none	NA	none	0	0	0	0	0	0	0	0	0	0	0	0	0	0	0	0	0	0	0	0	0	0	0	0	0	0	0	0	0	0	0	0	0
Primary_sclerosing_cholangitis	rs56258221-G	rs7750271	chr6	91036225	0.1163	none	none	none	NA	none	0	0	0	0	0	0	0	0	0	0	0	0	0	0	0	0	0	0	0	0	0	0	0	0	0	0	0	0	0	0	0	0	0
Primary_sclerosing_cholangitis	rs56258221-G	rs7750559	chr6	91036267	0.1163	none	none	none	NA	none	0	0	0	0	0	0	0	0	0	0	0	0	0	0	0	0	0	0	0	0	0	0	0	0	0	0	0	0	0	0	0	0	0
Primary_sclerosing_cholangitis	rs56258221-G	rs6919512	chr6	91037287	0.0912	none	none	none	NA	B_Cell_Centroblast	0	0	0	0	0	0	0	0	0	0	1	0	0	0	1	1	0	0	0	0	1	1	0	0	0	0	0	0	0	0	0	0	0
Primary_sclerosing_cholangitis	rs4147359-A	rs4147359	chr10	6108439	0.434	none	none	none	NA	Th0	1	0	1	1	1	1	1	1	0	1	1	1	1	1	1	0	1	1	1	0	0	1	0	1	1	1	0	1	0	1	0	0	0
Primary_sclerosing_cholangitis	rs4147359-A	rs7907829	chr10	6107007	0.2531	none	none	none	NA	CD25+_CD127-_Treg	0	0	0	1	1	1	0	0	1	1	1	1	1	1	1	0	1	1	1	0	1	1	0	1	1	1	0	0	0	1	0	0	0
Primary_sclerosing_cholangitis	rs4147359-A	rs12722485	chr10	6105136	0.2019	none	none	none	NA	CD25+_CD127-_Treg	0	0	0	0	0	0	0	1	1	1	1	1	1	1	1	1	1	1	1	1	1	1	0	1	0	0	0	1	0	0	0	0	0
Primary_sclerosing_cholangitis	rs7937682-G	rs7937682	chr11	111579939	0.0374	none	SIK2	none	NA	kidney	1	1	1	1	1	1	1	0	0	0	0	1	0	0	0	0	1	1	0	0	1	1	1	1	1	1	0	1	1	1	0	1	0
Primary_sclerosing_cholangitis	rs7937682-G	rs12362593	chr11	111586091	0.0374	none	SIK2	none	NA	B_Cell_Centroblast	1	1	1	1	1	1	1	1	1	1	1	0	0	1	1	0	1	1	1	1	1	1	0	0	1	1	1	1	1	1	0	1	1
Primary_sclerosing_cholangitis	rs7937682-G	rs4936661	chr11	111587495	0.0374	none	SIK2	none	NA	none	0	0	0	0	0	0	0	0	0	0	0	0	0	0	0	0	0	0	0	0	0	0	0	0	0	0	0	0	0	0	0	0	0
Primary_sclerosing_cholangitis	rs11168249-G	rs11168249	chr12	48208368	0.8769	none	HDAC7	none	NA	Th0	1	1	1	1	1	1	1	1	1	1	1	1	1	1	1	1	1	1	1	1	1	1	1	1	1	1	1	1	1	1	1	1	1
Primary_sclerosing_cholangitis	rs11168249-G	rs2525051	chr12	48195939	0.1231	none	HDAC7	none	NA	kidney	1	1	1	1	1	1	1	1	1	1	1	1	1	1	1	1	1	1	1	0	1	1	1	1	1	1	0	1	1	1	1	1	1
Primary_sclerosing_cholangitis	rs3184504-A	rs3184504	chr12	111884608	0.4476	missense	SH2B3	none	NA	Pancreatic_Islets	1	1	1	1	1	1	1	1	1	1	1	1	1	1	1	1	1	1	1	1	1	1	1	1	1	1	1	1	1	1	1	1	1
Primary_sclerosing_cholangitis	rs3184504-A	rs653178	chr12	112007756	0.25	none	ATXN2	none	NA	HSMM-myotube	1	1	1	1	1	1	1	1	1	1	1	0	1	1	0	1	1	1	1	1	0	1	1	1	1	1	1	1	1	1	1	1	1
Primary_sclerosing_cholangitis	rs3184504-A	rs7310615	chr12	111865049	0.0949	none	SH2B3	none	NA	colonic_mucosa	1	1	1	1	1	1	1	1	1	1	1	1	1	1	1	1	1	1	1	1	1	1	1	1	1	1	0	1	1	1	1	1	1
Primary_sclerosing_cholangitis	rs3184504-A	rs4766578	chr12	111904371	0.0655	none	ATXN2	none	NA	none	0	0	0	0	0	0	0	0	0	0	0	0	0	0	0	0	0	0	0	0	0	0	0	0	0	0	0	0	0	0	0	0	0
Primary_sclerosing_cholangitis	rs3184504-A	rs10774625	chr12	111910219	0.0652	none	ATXN2	none	NA	none	0	0	0	0	0	0	0	0	0	0	0	0	0	0	0	0	0	0	0	0	0	0	0	0	0	0	0	0	0	0	0	0	0
Primary_sclerosing_cholangitis	rs3184504-A	rs7137828	chr12	111932800	0.0423	none	ATXN2	none	NA	none	0	0	0	0	0	0	0	0	0	0	0	0	0	0	0	0	0	0	0	0	0	0	0	0	0	0	0	0	0	0	0	0	0
Primary_sclerosing_cholangitis	rs1788097-A	rs1788097	chr18	67543688	0.0581	none	CD226	none	NA	none	0	0	0	0	0	0	0	0	0	0	0	0	0	0	0	0	0	0	0	0	0	0	0	0	0	0	0	0	0	0	0	0	0
Primary_sclerosing_cholangitis	rs1788097-A	rs12969657	chr18	67536496	0.0581	none	CD226	DOK6	-	none	0	0	0	0	0	0	0	0	0	0	0	0	0	0	0	0	0	0	0	0	0	0	0	0	0	0	0	0	0	0	0	0	0
Primary_sclerosing_cholangitis	rs1788097-A	rs1788100	chr18	67540723	0.0581	none	CD226	DOK6	-	none	0	0	0	0	0	0	0	0	0	0	0	0	0	0	0	0	0	0	0	0	0	0	0	0	0	0	0	0	0	0	0	0	0
Primary_sclerosing_cholangitis	rs1788097-A	rs1788103	chr18	67538824	0.0415	none	CD226	DOK6	-	none	0	0	0	0	0	0	0	0	0	0	0	0	0	0	0	0	0	0	0	0	0	0	0	0	0	0	0	0	0	0	0	0	0
Primary_sclerosing_cholangitis	rs1788097-A	rs1865761	chr18	67539392	0.0415	none	CD226	DOK6	-	anterior_caudate	0	0	0	0	0	1	0	1	1	0	1	1	1	1	1	0	0	0	0	1	0	0	0	0	0	0	1	0	0	0	0	0	0
Primary_sclerosing_cholangitis	rs1788097-A	rs1788098	chr18	67542798	0.0412	none	CD226	none	NA	none	0	0	0	0	0	0	0	0	0	0	0	0	0	0	0	0	0	0	0	0	0	0	0	0	0	0	0	0	0	0	0	0	0
Primary_sclerosing_cholangitis	rs1788097-A	rs1790588	chr18	67535184	0.0409	none	CD226	DOK6	-	none	0	0	0	0	0	0	0	0	0	0	0	0	0	0	0	0	0	0	0	0	0	0	0	0	0	0	0	0	0	0	0	0	0
Primary_sclerosing_cholangitis	rs1788097-A	rs17207042	chr18	67537351	0.0386	none	CD226	DOK6	-	none	0	0	0	0	0	0	0	0	0	0	0	0	0	0	0	0	0	0	0	0	0	0	0	0	0	0	0	0	0	0	0	0	0
Primary_sclerosing_cholangitis	rs60652743-A	rs60652743	chr19	47205707	0.2887	none	PRKD2	PRKD2	-	none	0	0	0	0	0	0	0	0	0	0	0	0	0	0	0	0	0	0	0	0	0	0	0	0	0	0	0	0	0	0	0	0	0
Primary_sclerosing_cholangitis	rs60652743-A	rs425105	chr19	47208481	0.2887	none	PRKD2	PRKD2	-	CD25-_CD45RA+_naive	0	1	0	0	0	0	1	1	1	1	1	1	1	1	1	1	1	1	1	1	1	1	0	0	0	1	0	0	1	1	0	0	0
Primary_sclerosing_cholangitis	rs60652743-A	rs402072	chr19	47219122	0.0978	none	PRKD2	PRKD2	-	CD25-_CD45RA+_naive	1	1	1	1	1	1	1	1	1	1	1	1	1	1	1	1	1	1	1	1	1	1	1	1	1	1	1	1	1	1	0	1	1
Primary_sclerosing_cholangitis	rs60652743-A	rs313839	chr19	47221557	0.0961	none	none	PRKD2	-	GM12878	1	1	1	1	1	1	1	1	1	1	1	1	1	1	1	1	1	1	1	1	1	1	1	1	1	1	1	1	1	1	1	1	1
Primary_sclerosing_cholangitis	rs60652743-A	rs113374757	chr19	47256542	0.059	none	FKRP	PRKD2	-	B_Cell_Centroblast	0	1	1	1	0	1	1	1	1	1	0	1	1	1	1	1	1	0	1	1	1	1	0	1	0	0	0	0	1	1	0	1	0
Primary_sclerosing_cholangitis	rs60652743-A	rs112445263	chr19	47203356	0.033	none	PRKD2	none	NA	none	0	0	0	0	0	0	0	0	0	0	0	0	0	0	0	0	0	0	0	0	0	0	0	0	0	0	0	0	0	0	0	0	0
Primary_sclerosing_cholangitis	rs2836883-G	rs2836883	chr21	40466744	0.1741	none	none	none	NA	HepG2	1	1	1	1	1	1	1	1	0	0	0	0	1	1	1	0	1	1	0	0	1	1	1	1	1	1	1	1	0	1	1	1	1
Primary_sclerosing_cholangitis	rs2836883-G	rs4817987	chr21	40465901	0.1134	none	none	none	NA	adult_CD14	1	1	1	1	1	1	1	0	1	0	1	0	1	1	1	0	0	1	0	1	0	1	1	1	1	1	1	1	0	1	0	1	0
Primary_sclerosing_cholangitis	rs2836883-G	rs2836881	chr21	40466299	0.1134	none	none	none	NA	adult_CD14	1	1	1	1	1	1	1	0	1	0	1	0	1	1	1	0	0	1	0	1	0	1	1	1	1	1	1	1	0	1	0	1	0
Primary_sclerosing_cholangitis	rs2836883-G	rs2836882	chr21	40466570	0.1134	none	none	none	NA	HepG2	1	1	1	1	1	1	1	1	0	0	0	0	1	1	1	0	1	1	0	0	1	1	1	1	1	1	1	1	0	1	1	1	1
Primary_sclerosing_cholangitis	rs2836883-G	rs2836878	chr21	40465534	0.112	none	none	none	NA	adult_CD14	1	1	1	1	1	1	1	0	1	0	1	0	1	1	1	0	0	1	0	1	0	1	1	1	1	1	1	1	0	1	0	1	0
Primary_sclerosing_cholangitis	rs2836883-G	rs9808651	chr21	40466468	0.112	none	none	none	NA	HepG2	1	1	1	1	1	1	1	1	0	0	0	0	1	1	1	0	1	1	0	0	1	1	1	1	1	1	1	1	0	1	1	1	1
Primary_sclerosing_cholangitis	rs2836883-G	rs4817986	chr21	40465512	0.1077	none	none	none	NA	adult_CD14	1	1	1	1	1	1	1	0	1	0	1	0	1	1	1	0	0	1	0	1	0	1	1	1	1	1	1	1	0	1	0	1	0
Primary_sclerosing_cholangitis	rs2836883-G	rs4817983	chr21	40464924	0.0519	none	none	none	NA	none	0	0	0	0	0	0	0	0	0	0	0	0	0	0	0	0	0	0	0	0	0	0	0	0	0	0	0	0	0	0	0	0	0
Primary_sclerosing_cholangitis	rs2836883-G	rs9977672	chr21	40463283	0.0427	none	none	none	NA	B_Cell_Centroblast	0	0	0	0	1	0	1	1	0	0	0	0	1	0	1	0	0	1	0	0	1	1	1	1	1	0	1	1	0	1	0	0	0
Alopecia_areata	rs1024161-A	rs1024161	chr2	204721752	0.1904	none	none	none	NA	CD25+_CD127-_Treg	0	0	0	0	0	0	0	1	1	1	1	1	1	1	1	1	1	0	0	0	0	0	0	0	0	0	0	0	0	0	0	0	0
Alopecia_areata	rs1024161-A	rs231763	chr2	204720895	0.0995	none	none	none	NA	CD25+_CD127-_Treg	0	0	0	0	0	0	0	1	1	1	1	1	1	1	1	0	1	0	0	0	0	0	0	0	0	0	1	0	0	0	0	0	0
Alopecia_areata	rs1024161-A	rs1427679	chr2	204723750	0.0992	none	none	none	NA	CD25+_CD127-_Treg	0	0	0	0	0	0	0	1	1	1	1	1	1	1	1	1	1	1	0	0	1	0	0	1	1	0	1	0	0	0	1	0	0
Alopecia_areata	rs1024161-A	rs1427680	chr2	204729795	0.0855	none	none	none	NA	CD25+_CD127-_Treg	0	0	0	0	0	0	0	1	1	1	1	1	1	1	1	1	1	0	0	0	0	0	0	1	0	1	0	0	0	0	0	0	0
Alopecia_areata	rs1024161-A	rs736611	chr2	204730465	0.0855	none	none	none	NA	CD25+_CD127-_Treg	0	0	0	0	0	0	0	1	1	1	1	1	1	1	1	1	0	0	0	0	0	0	0	0	0	0	0	0	0	0	0	0	0
Alopecia_areata	rs1024161-A	rs11571315	chr2	204730901	0.0855	none	none	none	NA	CD25+_CD127-_Treg	0	0	0	0	0	0	0	1	1	1	1	1	1	1	1	1	0	0	0	0	0	0	0	0	0	0	0	0	0	0	0	0	0
Alopecia_areata	rs1024161-A	rs231764	chr2	204723541	0.0669	none	none	none	NA	CD25+_CD127-_Treg	0	0	0	0	0	0	0	1	1	1	1	1	1	1	1	1	1	1	0	0	1	0	0	1	1	0	1	0	0	0	1	0	0
Alopecia_areata	rs1024161-A	rs231770	chr2	204729153	0.0544	none	none	none	NA	CD25+_CD127-_Treg	0	0	0	0	0	0	0	1	1	1	1	1	1	1	1	1	1	0	0	0	0	0	0	1	0	1	0	0	0	0	0	0	0
Alopecia_areata	rs1024161-A	rs11571292	chr2	204720139	0.0354	none	none	none	NA	CD25+_CD127-_Treg	0	0	0	0	0	0	0	1	1	1	1	1	1	1	1	0	1	0	0	0	0	0	0	0	0	0	1	0	0	0	0	0	0
Alopecia_areata	rs1024161-A	rs926169	chr2	204722752	0.0354	none	none	none	NA	CD25+_CD127-_Treg	0	0	0	0	0	0	0	1	1	1	1	1	1	1	1	1	1	1	0	0	0	0	0	0	1	1	1	0	0	0	0	0	0
Alopecia_areata	rs7682241-A	rs7682241	chr4	123523875	0.1498	none	none	none	NA	Th1	0	0	0	1	1	0	0	0	0	0	1	1	1	1	1	0	1	0	0	0	0	1	1	0	1	0	1	0	0	1	0	1	0
Alopecia_areata	rs7682241-A	rs7656035	chr4	123520229	0.1498	none	none	none	NA	none	0	0	0	0	0	0	0	0	0	0	0	0	0	0	0	0	0	0	0	0	0	0	0	0	0	0	0	0	0	0	0	0	0
Alopecia_areata	rs7682241-A	rs7682481	chr4	123524026	0.1498	none	none	none	NA	Th1	0	0	0	1	1	0	0	0	0	0	1	1	1	1	1	0	1	0	0	0	0	1	1	0	1	0	1	0	0	1	0	1	0
Alopecia_areata	rs7682241-A	rs17391154	chr4	123556193	0.0804	none	BC045668	none	NA	none	0	0	0	0	0	0	0	0	0	0	0	0	0	0	0	0	0	0	0	0	0	0	0	0	0	0	0	0	0	0	0	0	0
Alopecia_areata	rs7682241-A	rs2390351	chr4	123556724	0.0804	none	BC045668	none	NA	none	0	0	0	0	0	0	0	0	0	0	0	0	0	0	0	0	0	0	0	0	0	0	0	0	0	0	0	0	0	0	0	0	0
Alopecia_areata	rs7682241-A	rs2390350	chr4	123534697	0.0665	none	IL21	none	NA	none	0	0	0	0	0	0	0	0	0	0	0	0	0	0	0	0	0	0	0	0	0	0	0	0	0	0	0	0	0	0	0	0	0
Alopecia_areata	rs7682241-A	rs2036981	chr4	123550193	0.0568	none	BC045668	none	NA	none	0	0	0	0	0	0	0	0	0	0	0	0	0	0	0	0	0	0	0	0	0	0	0	0	0	0	0	0	0	0	0	0	0
Alopecia_areata	rs9479482-A	rs9479482	chr6	150358012	0.098	none	none	none	NA	none	0	0	0	0	0	0	0	0	0	0	0	0	0	0	0	0	0	0	0	0	0	0	0	0	0	0	0	0	0	0	0	0	0
Alopecia_areata	rs9479482-A	rs11155696	chr6	150357283	0.098	none	none	none	NA	none	0	0	0	0	0	0	0	0	0	0	0	0	0	0	0	0	0	0	0	0	0	0	0	0	0	0	0	0	0	0	0	0	0
Alopecia_areata	rs9479482-A	rs11155697	chr6	150357423	0.098	none	none	none	NA	none	0	0	0	0	0	0	0	0	0	0	0	0	0	0	0	0	0	0	0	0	0	0	0	0	0	0	0	0	0	0	0	0	0
Alopecia_areata	rs9479482-A	rs9479481	chr6	150357944	0.098	none	none	none	NA	none	0	0	0	0	0	0	0	0	0	0	0	0	0	0	0	0	0	0	0	0	0	0	0	0	0	0	0	0	0	0	0	0	0
Alopecia_areata	rs9479482-A	rs763574	chr6	150349415	0.0564	none	none	none	NA	none	0	0	0	0	0	0	0	0	0	0	0	0	0	0	0	0	0	0	0	0	0	0	0	0	0	0	0	0	0	0	0	0	0
Alopecia_areata	rs9479482-A	rs34006533	chr6	150350574	0.0564	none	none	none	NA	none	0	0	0	0	0	0	0	0	0	0	0	0	0	0	0	0	0	0	0	0	0	0	0	0	0	0	0	0	0	0	0	0	0
Alopecia_areata	rs9479482-A	rs13198863	chr6	150350781	0.0564	none	none	none	NA	none	0	0	0	0	0	0	0	0	0	0	0	0	0	0	0	0	0	0	0	0	0	0	0	0	0	0	0	0	0	0	0	0	0
Alopecia_areata	rs9479482-A	rs11754987	chr6	150351204	0.0564	none	none	none	NA	none	0	0	0	0	0	0	0	0	0	0	0	0	0	0	0	0	0	0	0	0	0	0	0	0	0	0	0	0	0	0	0	0	0
Alopecia_areata	rs9479482-A	rs9478380	chr6	150354665	0.0564	none	none	none	NA	none	0	0	0	0	0	0	0	0	0	0	0	0	0	0	0	0	0	0	0	0	0	0	0	0	0	0	0	0	0	0	0	0	0
Alopecia_areata	rs9479482-A	rs4086064	chr6	150355290	0.0564	none	none	none	NA	none	0	0	0	0	0	0	0	0	0	0	0	0	0	0	0	0	0	0	0	0	0	0	0	0	0	0	0	0	0	0	0	0	0
Alopecia_areata	rs9479482-A	rs11752529	chr6	150347971	0.0316	none	none	none	NA	none	0	0	0	0	0	0	0	0	0	0	0	0	0	0	0	0	0	0	0	0	0	0	0	0	0	0	0	0	0	0	0	0	0
Alopecia_areata	rs10760706-G	rs10760706	chr9	102723692	0.0344	none	STX17	none	NA	none	0	0	0	0	0	0	0	0	0	0	0	0	0	0	0	0	0	0	0	0	0	0	0	0	0	0	0	0	0	0	0	0	0
Alopecia_areata	rs10760706-G	rs1997368	chr9	102713580	0.0344	none	STX17	STX17	+	none	0	0	0	0	0	0	0	0	0	0	0	0	0	0	0	0	0	0	0	0	0	0	0	0	0	0	0	0	0	0	0	0	0
Alopecia_areata	rs10760706-G	rs1997367	chr9	102713758	0.0344	none	STX17	STX17	+	none	0	0	0	0	0	0	0	0	0	0	0	0	0	0	0	0	0	0	0	0	0	0	0	0	0	0	0	0	0	0	0	0	0
Alopecia_areata	rs10760706-G	rs10512268	chr9	102714466	0.0344	none	STX17	STX17	+	none	0	0	0	0	0	0	0	0	0	0	0	0	0	0	0	0	0	0	0	0	0	0	0	0	0	0	0	0	0	0	0	0	0
Alopecia_areata	rs10760706-G	rs1830454	chr9	102718133	0.0344	none	STX17	none	NA	GM12878	0	1	0	0	0	0	0	1	1	1	1	0	1	1	1	1	1	1	1	1	1	1	1	0	0	1	0	0	0	0	0	1	1
Alopecia_areata	rs10760706-G	rs7027619	chr9	102719728	0.0344	none	STX17	none	NA	none	0	0	0	0	0	0	0	0	0	0	0	0	0	0	0	0	0	0	0	0	0	0	0	0	0	0	0	0	0	0	0	0	0
Alopecia_areata	rs10760706-G	rs66799478	chr9	102726353	0.0344	none	STX17	none	NA	chondrogenic_dif_cells	0	0	0	1	1	0	0	1	1	1	1	0	0	0	0	1	1	0	1	0	0	1	0	0	0	1	0	0	0	0	1	1	1
Alopecia_areata	rs3118470-G	rs3118470	chr10	6101713	0.7062	none	IL2RA	none	NA	Th0	0	0	0	0	0	0	0	1	1	1	1	1	1	1	1	1	0	0	1	1	1	0	0	1	0	0	0	0	0	1	0	0	0
Alopecia_areata	rs3118470-G	rs3134883	chr10	6100725	0.0691	none	IL2RA	none	NA	CD25-_IL17-_Th_stim_MACS	0	0	0	0	0	0	0	1	1	1	1	1	1	1	1	1	0	1	1	1	1	0	0	0	1	1	0	0	0	1	0	0	1
Alopecia_areata	rs3118470-G	rs3118469	chr10	6101129	0.0691	none	IL2RA	none	NA	CD25-_IL17-_Th_stim_MACS	0	0	0	0	0	0	0	1	1	1	1	1	1	1	1	1	0	1	1	1	1	0	0	0	1	1	0	0	0	1	0	0	1
Alopecia_areata	rs3118470-G	rs3118471	chr10	6102757	0.0691	none	IL2RA	none	NA	Th1	0	0	0	0	0	0	0	1	1	1	1	1	1	1	1	1	0	0	1	1	1	1	0	1	1	0	0	0	0	0	0	0	0
Alopecia_areata	rs694739-A	rs694739	chr11	64097233	0.1416	none	none	none	NA	colonic_mucosa	1	0	1	0	1	1	1	1	0	0	0	1	1	0	0	0	0	0	0	1	1	0	1	1	1	1	0	1	1	1	1	1	1
Alopecia_areata	rs694739-A	rs61886886	chr11	64104488	0.0685	none	none	none	NA	none	0	0	0	0	0	0	0	0	0	0	0	0	0	0	0	0	0	0	0	0	0	0	0	0	0	0	0	0	0	0	0	0	0
Alopecia_areata	rs694739-A	rs499425	chr11	64105929	0.0637	none	none	none	NA	CD25-_CD45RO+_mem	0	1	0	1	1	1	0	1	1	1	1	1	1	1	1	1	1	1	1	1	1	1	1	1	1	0	0	1	1	0	0	0	0
Alopecia_areata	rs694739-A	rs1783521	chr11	64106291	0.0637	none	none	none	NA	CD25-_CD45RO+_mem	0	1	0	1	1	1	0	1	1	1	1	1	1	1	1	1	1	1	1	1	1	1	1	1	1	0	0	1	1	0	0	0	0
Alopecia_areata	rs694739-A	rs646153	chr11	64089588	0.0636	none	none	none	NA	colonic_mucosa	1	0	1	0	1	1	1	1	1	0	0	0	1	0	1	0	0	0	0	1	0	1	1	1	1	0	0	1	1	1	0	0	0
Alopecia_areata	rs694739-A	rs627425	chr11	64087642	0.0595	none	PRDX5	none	NA	colonic_mucosa	1	0	1	1	1	1	1	1	0	1	1	1	1	1	0	1	1	1	1	1	1	1	1	1	1	0	1	0	1	0	0	0	0
Alopecia_areata	rs694739-A	rs574087	chr11	64102948	0.0595	none	none	CCDC88B	+	B_Cell_Centroblast	0	0	0	0	0	0	0	0	0	1	1	0	1	1	0	0	1	1	1	1	1	1	1	1	1	0	0	0	1	0	1	1	1
Alopecia_areata	rs694739-A	rs11231757	chr11	64106317	0.0527	none	none	none	NA	CD25-_CD45RO+_mem	0	1	0	1	1	1	0	1	1	1	1	1	1	1	1	1	1	1	1	1	1	1	1	1	1	0	0	1	1	0	0	0	0
Alopecia_areata	rs694739-A	rs11601860	chr11	64110422	0.0384	none	CCDC88B	none	NA	K562	1	1	1	1	1	1	1	1	1	1	1	1	1	1	1	0	1	1	1	1	0	1	1	1	1	1	1	1	1	1	1	1	1
Alopecia_areata	rs694739-A	rs2510066	chr11	64052447	0.0381	utr5	GPR137	none	NA	CD25+_CD127-_Treg	1	1	1	1	1	1	1	1	1	1	1	1	1	1	1	1	1	1	1	1	1	1	1	1	1	1	1	1	1	1	1	1	1
Alopecia_areata	rs694739-A	rs574835	chr11	64110668	0.0348	synonymous	CCDC88B	none	NA	none	0	0	0	0	0	0	0	0	0	0	0	0	0	0	0	0	0	0	0	0	0	0	0	0	0	0	0	0	0	0	0	0	0
Alopecia_areata	rs694739-A	rs647152	chr11	64109118	0.0346	missense	CCDC88B	none	NA	CD25-_CD45RO+_mem	0	0	1	1	1	1	1	1	1	1	1	1	1	1	1	0	1	1	1	1	1	1	1	1	0	0	0	1	0	0	1	0	0
Alopecia_areata	rs694739-A	rs479552	chr11	64110683	0.0301	synonymous	CCDC88B	none	NA	none	0	0	0	0	0	0	0	0	0	0	0	0	0	0	0	0	0	0	0	0	0	0	0	0	0	0	0	0	0	0	0	0	0
Alopecia_areata	rs1701704-C	rs1701704	chr12	56412487	0.1297	none	IKZF4	none	NA	kidney	0	0	0	1	0	0	0	1	1	0	0	1	0	1	1	1	1	0	1	0	1	0	1	1	1	0	1	1	1	1	0	0	0
Alopecia_areata	rs1701704-C	rs2456973	chr12	56416928	0.0773	none	IKZF4	none	NA	K562	1	1	1	1	0	1	1	1	1	1	1	1	1	1	1	1	1	1	1	1	1	1	1	1	0	1	0	0	1	0	0	0	0
Alopecia_areata	rs1701704-C	rs61938962	chr12	56446766	0.0619	none	none	none	NA	none	0	0	0	0	0	0	0	0	0	0	0	0	0	0	0	0	0	0	0	0	0	0	0	0	0	0	0	0	0	0	0	0	0
Alopecia_areata	rs1701704-C	rs61938963	chr12	56446804	0.0619	none	none	none	NA	none	0	0	0	0	0	0	0	0	0	0	0	0	0	0	0	0	0	0	0	0	0	0	0	0	0	0	0	0	0	0	0	0	0
Alopecia_areata	rs1701704-C	rs34415530	chr12	56444632	0.0566	none	none	none	NA	none	0	0	0	0	0	0	0	0	0	0	0	0	0	0	0	0	0	0	0	0	0	0	0	0	0	0	0	0	0	0	0	0	0
Alopecia_areata	rs1701704-C	rs705704	chr12	56435412	0.0447	none	none	none	NA	K562	1	1	1	1	1	1	1	1	1	1	1	1	1	1	1	1	1	1	1	1	1	1	1	1	1	1	1	1	1	1	1	1	1
Alopecia_areata	rs1701704-C	rs772921	chr12	56403577	0.0446	none	none	none	NA	AdiposeNuclei	1	1	1	1	1	1	0	1	1	1	1	1	1	1	1	1	1	0	0	1	0	0	1	1	0	1	1	1	1	1	0	0	0
Alopecia_areata	rs1701704-C	rs1702877	chr12	56427808	0.0446	none	IKZF4	none	NA	Th1	0	0	0	0	1	0	0	1	1	1	1	1	1	1	1	0	1	0	0	0	1	1	0	0	0	0	0	0	1	0	0	0	0
Alopecia_areata	rs1701704-C	rs2640564	chr12	56455294	0.0365	none	none	none	NA	none	0	0	0	0	0	0	0	0	0	0	0	0	0	0	0	0	0	0	0	0	0	0	0	0	0	0	0	0	0	0	0	0	0
Alopecia_areata	rs1701704-C	rs7302200	chr12	56449435	0.0364	none	none	none	NA	NH-Osteoblast	0	0	0	0	0	0	0	1	0	0	0	1	0	1	1	1	0	0	0	0	1	1	0	0	0	0	0	0	0	0	1	1	1
Alopecia_areata	rs1701704-C	rs10876866	chr12	56445366	0.0342	none	none	none	NA	none	0	0	0	0	0	0	0	0	0	0	0	0	0	0	0	0	0	0	0	0	0	0	0	0	0	0	0	0	0	0	0	0	0
Alopecia_areata	rs1701704-C	rs1689510	chr12	56396768	0.0322	none	SUOX	none	NA	none	0	0	0	0	0	0	0	0	0	0	0	0	0	0	0	0	0	0	0	0	0	0	0	0	0	0	0	0	0	0	0	0	0
Alopecia_areata	rs1701704-C	rs141490969	chr12	56450107	0.0303	none	none	none	NA	NH-Osteoblast	0	0	0	0	0	0	0	1	0	0	0	1	0	1	1	1	0	0	0	0	1	1	0	0	0	0	0	0	0	0	1	1	1
Alopecia_areata	rs1701704-C	rs705705	chr12	56435504	0.0285	none	none	none	NA	K562	1	1	1	1	1	1	1	1	1	1	1	1	1	1	1	1	1	1	1	1	1	1	1	1	1	1	1	1	1	1	1	1	1
Juvenile_idiopathic_arthritis	rs4648881-G	rs4648881	chr1	25197155	0.3357	none	none	none	NA	Mobilized_CD34	0	0	0	0	0	0	0	0	1	1	0	1	0	1	1	1	0	0	1	1	1	1	0	0	0	0	0	1	0	0	0	0	0
Juvenile_idiopathic_arthritis	rs4648881-G	rs4649032	chr1	25197586	0.1442	none	none	none	NA	Mobilized_CD34	0	0	0	0	0	0	0	0	0	0	0	0	1	0	1	1	0	1	1	1	0	1	1	0	1	0	1	0	0	0	0	0	0
Juvenile_idiopathic_arthritis	rs4648881-G	rs6686594	chr1	25199282	0.1207	none	none	none	NA	none	0	0	0	0	0	0	0	0	0	0	0	0	0	0	0	0	0	0	0	0	0	0	0	0	0	0	0	0	0	0	0	0	0
Juvenile_idiopathic_arthritis	rs4648881-G	rs6682408	chr1	25200246	0.1207	none	none	none	NA	none	0	0	0	0	0	0	0	0	0	0	0	0	0	0	0	0	0	0	0	0	0	0	0	0	0	0	0	0	0	0	0	0	0
Juvenile_idiopathic_arthritis	rs4648881-G	rs10903110	chr1	25203390	0.1207	none	none	none	NA	GM12878	0	0	0	0	0	0	0	0	0	0	0	0	0	1	0	0	0	0	0	1	1	0	0	0	0	0	0	0	0	0	0	0	0
Juvenile_idiopathic_arthritis	rs4648881-G	rs4649033	chr1	25207629	0.0439	none	none	none	NA	none	0	0	0	0	0	0	0	0	0	0	0	0	0	0	0	0	0	0	0	0	0	0	0	0	0	0	0	0	0	0	0	0	0
Juvenile_idiopathic_arthritis	rs4648881-G	rs4649034	chr1	25210815	0.0422	none	none	none	NA	none	0	0	0	0	0	0	0	0	0	0	0	0	0	0	0	0	0	0	0	0	0	0	0	0	0	0	0	0	0	0	0	0	0
Juvenile_idiopathic_arthritis	rs6679677-A	rs6679677	chr1	114303808	0.6403	none	none	none	NA	Mobilized_CD34	1	0	1	1	0	0	0	1	1	1	1	1	0	1	0	1	1	1	1	0	0	1	1	0	0	1	1	0	1	0	0	1	1
Juvenile_idiopathic_arthritis	rs6679677-A	rs2476601	chr1	114377568	0.3597	missense	PTPN22	none	NA	none	0	0	0	0	0	0	0	0	0	0	0	0	0	0	0	0	0	0	0	0	0	0	0	0	0	0	0	0	0	0	0	0	0
Juvenile_idiopathic_arthritis	rs72698115-C	rs72698115	chr1	154379369	0.1598	none	IL6R	none	NA	adult_CD14	1	1	1	1	1	1	1	1	1	1	1	1	1	1	1	1	1	1	1	1	1	1	1	1	1	1	1	1	1	1	1	1	1
Juvenile_idiopathic_arthritis	rs72698115-C	rs72696301	chr1	154355501	0.0573	none	none	none	NA	none	0	0	0	0	0	0	0	0	0	0	0	0	0	0	0	0	0	0	0	0	0	0	0	0	0	0	0	0	0	0	0	0	0
Juvenile_idiopathic_arthritis	rs72698115-C	rs9651053	chr1	154359411	0.0573	none	none	none	NA	CD25+_CD127-_Treg	0	0	0	0	0	0	0	1	1	1	1	1	1	1	1	1	1	1	1	1	1	1	1	1	1	1	1	1	1	1	0	0	0
Juvenile_idiopathic_arthritis	rs72698115-C	rs9651036	chr1	154360492	0.0573	none	none	none	NA	Th2	0	0	0	0	0	0	0	1	1	1	1	1	1	1	1	1	1	0	1	1	1	0	1	1	0	0	1	1	1	1	0	0	0
Juvenile_idiopathic_arthritis	rs72698115-C	rs9651055	chr1	154360684	0.0573	none	none	none	NA	Th2	0	0	0	0	0	0	0	1	1	1	1	1	1	1	1	1	1	0	1	1	1	0	1	1	0	0	1	1	1	1	0	0	0
Juvenile_idiopathic_arthritis	rs72698115-C	rs111920902	chr1	154361226	0.0573	none	none	none	NA	Th2	0	0	0	0	0	0	0	1	1	1	1	1	1	1	1	1	1	0	1	1	1	0	1	1	0	0	1	1	1	1	0	0	0
Juvenile_idiopathic_arthritis	rs72698115-C	rs12026876	chr1	154361788	0.0573	none	none	none	NA	none	0	0	0	0	0	0	0	0	0	0	0	0	0	0	0	0	0	0	0	0	0	0	0	0	0	0	0	0	0	0	0	0	0
Juvenile_idiopathic_arthritis	rs72698115-C	rs11265608	chr1	154364140	0.0573	none	none	none	NA	none	0	0	0	0	0	0	0	0	0	0	0	0	0	0	0	0	0	0	0	0	0	0	0	0	0	0	0	0	0	0	0	0	0
Juvenile_idiopathic_arthritis	rs72698115-C	rs12033701	chr1	154365886	0.0573	none	none	none	NA	none	0	0	0	0	0	0	0	0	0	0	0	0	0	0	0	0	0	0	0	0	0	0	0	0	0	0	0	0	0	0	0	0	0
Juvenile_idiopathic_arthritis	rs72698115-C	rs113057497	chr1	154367754	0.0573	none	none	none	NA	none	0	0	0	0	0	0	0	0	0	0	0	0	0	0	0	0	0	0	0	0	0	0	0	0	0	0	0	0	0	0	0	0	0
Juvenile_idiopathic_arthritis	rs72698115-C	rs138582043	chr1	154367898	0.0573	none	none	none	NA	none	0	0	0	0	0	0	0	0	0	0	0	0	0	0	0	0	0	0	0	0	0	0	0	0	0	0	0	0	0	0	0	0	0
Juvenile_idiopathic_arthritis	rs72698115-C	rs111810442	chr1	154369683	0.0573	none	none	none	NA	CD25+_CD127-_Treg	0	0	0	0	0	0	0	1	1	1	1	1	1	0	1	1	0	1	0	1	1	0	0	0	0	0	0	0	1	1	0	0	0
Juvenile_idiopathic_arthritis	rs72698115-C	rs73026617	chr1	154369981	0.0573	none	none	none	NA	CD25+_CD127-_Treg	0	0	0	0	0	0	0	1	1	1	1	1	1	0	1	1	0	1	0	1	1	0	0	0	0	0	0	0	1	1	0	0	0
Juvenile_idiopathic_arthritis	rs72698115-C	rs144111494	chr1	154368224	0.0311	none	none	none	NA	none	0	0	0	0	0	0	0	0	0	0	0	0	0	0	0	0	0	0	0	0	0	0	0	0	0	0	0	0	0	0	0	0	0
Juvenile_idiopathic_arthritis	rs10194635-T	rs10194635	chr2	100834217	0.2072	none	BC105019	none	NA	CD25-_IL17+_Th17_stim	0	0	0	0	0	0	0	0	1	1	0	1	1	1	0	0	0	0	0	0	0	0	0	0	0	0	0	1	0	1	0	0	0
Juvenile_idiopathic_arthritis	rs10194635-T	rs2309837	chr2	100837567	0.1513	none	BC105019	none	NA	none	0	0	0	0	0	0	0	0	0	0	0	0	0	0	0	0	0	0	0	0	0	0	0	0	0	0	0	0	0	0	0	0	0
Juvenile_idiopathic_arthritis	rs10194635-T	rs4851269	chr2	100830348	0.1197	none	BC105019	none	NA	Duodenum_mucosa	0	0	1	0	0	0	0	0	1	0	0	0	0	0	0	0	0	1	0	0	0	0	0	1	1	1	1	1	0	0	1	0	1
Juvenile_idiopathic_arthritis	rs10194635-T	rs1160544	chr2	100832218	0.1197	none	BC105019	none	NA	Liver1	0	0	0	0	0	0	1	0	0	0	0	1	1	0	1	0	0	1	0	0	0	0	1	1	1	1	0	1	0	1	0	0	0
Juvenile_idiopathic_arthritis	rs10194635-T	rs6754937	chr2	100827720	0.0945	none	BC105019	none	NA	adult_CD14	0	0	0	0	0	0	0	1	0	0	0	1	1	0	1	0	0	1	0	0	0	0	0	0	0	0	0	0	0	0	0	0	0
Juvenile_idiopathic_arthritis	rs10194635-T	rs893245	chr2	100814893	0.0632	none	none	none	NA	AdiposeNuclei	1	1	1	1	1	1	1	0	0	0	0	0	1	0	1	0	0	0	0	0	0	1	1	1	1	1	0	1	1	1	1	1	1
Juvenile_idiopathic_arthritis	rs10194635-T	rs6740838	chr2	100813499	0.0602	none	none	none	NA	AdiposeNuclei	1	1	1	1	1	1	1	0	0	0	0	0	0	1	0	0	0	0	0	0	1	1	1	1	1	1	0	1	0	1	1	1	1
Juvenile_idiopathic_arthritis	rs10194635-T	rs6740612	chr2	100813331	0.0545	none	none	none	NA	AdiposeNuclei	1	1	1	1	1	1	1	0	0	0	0	0	0	1	0	0	0	0	0	0	1	1	1	1	1	1	0	1	0	1	1	1	1
Juvenile_idiopathic_arthritis	rs10174238-G	rs10174238	chr2	191973034	0.5649	none	STAT4	none	NA	Th2	1	0	0	0	0	0	0	0	1	1	1	1	1	1	1	1	1	0	0	1	0	0	0	0	0	1	0	1	0	1	0	0	0
Juvenile_idiopathic_arthritis	rs10174238-G	rs10181656	chr2	191969879	0.0577	none	STAT4	none	NA	CD25-_IL17-_Th_stim_MACS	0	0	0	0	0	0	0	1	1	0	1	1	0	0	0	1	0	0	0	0	0	0	0	0	0	0	0	0	0	0	0	1	1
Juvenile_idiopathic_arthritis	rs10174238-G	rs8179673	chr2	191969341	0.0572	none	STAT4	none	NA	CD25-_IL17-_Th_stim_MACS	0	0	0	0	0	0	0	1	1	0	1	1	0	0	0	1	0	0	0	0	0	0	0	0	0	0	0	0	0	0	0	1	1
Juvenile_idiopathic_arthritis	rs10174238-G	rs7582694	chr2	191970120	0.0532	none	STAT4	none	NA	CD25-_IL17-_Th_stim_MACS	0	0	0	0	0	0	0	1	1	0	1	1	0	0	0	1	0	0	0	0	0	0	0	0	0	0	0	0	0	0	0	1	1
Juvenile_idiopathic_arthritis	rs10174238-G	rs7568275	chr2	191966452	0.0513	none	STAT4	none	NA	none	0	0	0	0	0	0	0	0	0	0	0	0	0	0	0	0	0	0	0	0	0	0	0	0	0	0	0	0	0	0	0	0	0
Juvenile_idiopathic_arthritis	rs10174238-G	rs7574865	chr2	191964633	0.0504	none	STAT4	none	NA	none	0	0	0	0	0	0	0	0	0	0	0	0	0	0	0	0	0	0	0	0	0	0	0	0	0	0	0	0	0	0	0	0	0
Juvenile_idiopathic_arthritis	rs10174238-G	rs4274624	chr2	191958656	0.0483	none	STAT4	none	NA	none	0	0	0	0	0	0	0	0	0	0	0	0	0	0	0	0	0	0	0	0	0	0	0	0	0	0	0	0	0	0	0	0	0
Juvenile_idiopathic_arthritis	rs10174238-G	rs4853458	chr2	191959489	0.0435	none	STAT4	none	NA	none	0	0	0	0	0	0	0	0	0	0	0	0	0	0	0	0	0	0	0	0	0	0	0	0	0	0	0	0	0	0	0	0	0
Juvenile_idiopathic_arthritis	rs10174238-G	rs11889341	chr2	191943742	0.0376	none	STAT4	none	NA	CD25-_IL17-_Th_stim_MACS	0	0	0	0	0	0	0	1	1	1	1	1	0	0	1	1	1	0	0	0	0	0	0	0	0	0	0	0	0	0	0	0	0
Juvenile_idiopathic_arthritis	rs79893749-C	rs79893749	chr3	46253650	0.1301	none	CCR3	none	NA	adult_CD14	0	0	0	0	0	0	0	1	0	0	0	1	1	1	1	0	0	1	0	1	1	0	1	0	0	0	1	0	0	0	0	0	0
Juvenile_idiopathic_arthritis	rs79893749-C	rs112160248	chr3	46260225	0.0572	none	CCR3	none	NA	none	0	0	0	0	0	0	0	0	0	0	0	0	0	0	0	0	0	0	0	0	0	0	0	0	0	0	0	0	0	0	0	0	0
Juvenile_idiopathic_arthritis	rs79893749-C	rs74433128	chr3	46279933	0.0278	none	CCR3	none	NA	none	0	0	0	0	0	0	0	0	0	0	0	0	0	0	0	0	0	0	0	0	0	0	0	0	0	0	0	0	0	0	0	0	0
Juvenile_idiopathic_arthritis	rs79893749-C	rs75994669	chr3	46300863	0.0277	none	CCR3	none	NA	none	0	0	0	0	0	0	0	0	0	0	0	0	0	0	0	0	0	0	0	0	0	0	0	0	0	0	0	0	0	0	0	0	0
Juvenile_idiopathic_arthritis	rs79893749-C	rs79539493	chr3	46302938	0.0276	none	CCR3	none	NA	none	0	0	0	0	0	0	0	0	0	0	0	0	0	0	0	0	0	0	0	0	0	0	0	0	0	0	0	0	0	0	0	0	0
Juvenile_idiopathic_arthritis	rs11714843-A	rs11714843	chr3	119221064	0.195	none	TIMMDC1	none	NA	none	0	0	0	0	0	0	0	0	0	0	0	0	0	0	0	0	0	0	0	0	0	0	0	0	0	0	0	0	0	0	0	0	0
Juvenile_idiopathic_arthritis	rs11714843-A	rs59024323	chr3	119221333	0.0398	none	TIMMDC1	none	NA	none	0	0	0	0	0	0	0	0	0	0	0	0	0	0	0	0	0	0	0	0	0	0	0	0	0	0	0	0	0	0	0	0	0
Juvenile_idiopathic_arthritis	rs11714843-A	rs62264483	chr3	119226831	0.0398	none	TIMMDC1	none	NA	Mobilized_CD34	0	1	0	1	1	0	0	1	1	1	1	1	1	1	1	1	1	1	1	1	1	1	1	0	0	1	0	0	1	1	0	1	1
Juvenile_idiopathic_arthritis	rs11714843-A	rs4688011	chr3	119227247	0.0398	none	TIMMDC1	none	NA	Mobilized_CD34	0	1	0	1	1	0	0	1	1	1	1	1	1	1	1	1	1	1	1	1	1	1	1	0	0	1	0	0	1	1	0	1	1
Juvenile_idiopathic_arthritis	rs11714843-A	rs4688013	chr3	119229486	0.0398	none	TIMMDC1	none	NA	HepG2	0	0	0	0	0	0	0	0	0	1	0	0	0	0	1	0	0	1	1	0	0	1	0	0	0	0	1	0	0	0	0	0	0
Juvenile_idiopathic_arthritis	rs11714843-A	rs11719448	chr3	119234594	0.0398	none	TIMMDC1	none	NA	none	0	0	0	0	0	0	0	0	0	0	0	0	0	0	0	0	0	0	0	0	0	0	0	0	0	0	0	0	0	0	0	0	0
Juvenile_idiopathic_arthritis	rs11714843-A	rs11720158	chr3	119240130	0.0398	none	TIMMDC1	none	NA	none	0	0	0	0	0	0	0	0	0	0	0	0	0	0	0	0	0	0	0	0	0	0	0	0	0	0	0	0	0	0	0	0	0
Juvenile_idiopathic_arthritis	rs11714843-A	rs1599795	chr3	119243855	0.0398	utr3	CD80	none	NA	adult_CD20	0	0	0	1	0	0	0	1	1	1	1	1	0	1	0	1	0	1	1	1	0	1	1	0	0	1	1	0	1	1	1	1	1
Juvenile_idiopathic_arthritis	rs11714843-A	rs1599796	chr3	119243934	0.0398	utr3	CD80	none	NA	adult_CD20	0	0	0	1	0	0	0	1	1	1	1	1	0	1	0	1	0	1	1	1	0	1	1	0	0	1	1	0	1	1	1	1	1
Juvenile_idiopathic_arthritis	rs11714843-A	rs62264487	chr3	119247898	0.0398	none	CD80	none	NA	none	0	0	0	0	0	0	0	0	0	0	0	0	0	0	0	0	0	0	0	0	0	0	0	0	0	0	0	0	0	0	0	0	0
Juvenile_idiopathic_arthritis	rs11714843-A	rs2280670	chr3	119217312	0.0348	none	none	none	NA	CD45RO_CD8	1	1	1	1	1	1	1	1	1	1	1	1	1	1	1	1	1	1	1	1	1	1	1	1	1	1	1	1	1	1	1	1	1
Juvenile_idiopathic_arthritis	rs11714843-A	rs4688009	chr3	119214239	0.0343	none	none	none	NA	none	0	0	0	0	0	0	0	0	0	0	0	0	0	0	0	0	0	0	0	0	0	0	0	0	0	0	0	0	0	0	0	0	0
Juvenile_idiopathic_arthritis	rs1479924-A	rs1479924	chr4	123387600	0.0623	none	none	none	NA	none	0	0	0	0	0	0	0	0	0	0	0	0	0	0	0	0	0	0	0	0	0	0	0	0	0	0	0	0	0	0	0	0	0
Juvenile_idiopathic_arthritis	rs1479924-A	rs6849238	chr4	123402770	0.0489	none	none	none	NA	K562	0	0	0	0	0	0	0	0	1	1	0	0	0	0	0	0	0	0	0	0	1	0	1	0	0	0	0	0	0	0	0	0	1
Juvenile_idiopathic_arthritis	rs1479924-A	rs7684187	chr4	123341159	0.0422	none	ADAD1	none	NA	none	0	0	0	0	0	0	0	0	0	0	0	0	0	0	0	0	0	0	0	0	0	0	0	0	0	0	0	0	0	0	0	0	0
Juvenile_idiopathic_arthritis	rs1479924-A	rs10027390	chr4	123368516	0.0421	none	none	none	NA	none	0	0	0	0	0	0	0	0	0	0	0	0	0	0	0	0	0	0	0	0	0	0	0	0	0	0	0	0	0	0	0	0	0
Juvenile_idiopathic_arthritis	rs1479924-A	rs4833830	chr4	123422563	0.0419	none	none	none	NA	K562	0	0	0	0	0	0	0	0	1	0	1	0	0	0	0	0	0	0	0	0	0	0	1	0	0	0	1	0	0	0	0	0	0
Juvenile_idiopathic_arthritis	rs1479924-A	rs11575812	chr4	123371049	0.0409	none	none	none	NA	none	0	0	0	0	0	0	0	0	0	0	0	0	0	0	0	0	0	0	0	0	0	0	0	0	0	0	0	0	0	0	0	0	0
Juvenile_idiopathic_arthritis	rs1479924-A	rs4833823	chr4	123318542	0.0406	none	ADAD1	none	NA	none	0	0	0	0	0	0	0	0	0	0	0	0	0	0	0	0	0	0	0	0	0	0	0	0	0	0	0	0	0	0	0	0	0
Juvenile_idiopathic_arthritis	rs1479924-A	rs13145929	chr4	123352201	0.0406	none	none	none	NA	none	0	0	0	0	0	0	0	0	0	0	0	0	0	0	0	0	0	0	0	0	0	0	0	0	0	0	0	0	0	0	0	0	0
Juvenile_idiopathic_arthritis	rs1479924-A	rs2069776	chr4	123371976	0.0399	none	none	none	NA	CD25-_IL17-_Th_stim_MACS	0	0	0	0	0	0	0	1	0	0	1	1	1	1	1	1	1	0	0	0	0	0	0	0	0	0	0	0	0	0	0	0	0
Juvenile_idiopathic_arthritis	rs1479924-A	rs13122023	chr4	123331316	0.0398	none	ADAD1	none	NA	none	0	0	0	0	0	0	0	0	0	0	0	0	0	0	0	0	0	0	0	0	0	0	0	0	0	0	0	0	0	0	0	0	0
Juvenile_idiopathic_arthritis	rs1479924-A	rs35077420	chr4	123384460	0.0394	none	none	none	NA	none	0	0	0	0	0	0	0	0	0	0	0	0	0	0	0	0	0	0	0	0	0	0	0	0	0	0	0	0	0	0	0	0	0
Juvenile_idiopathic_arthritis	rs1479924-A	rs6814718	chr4	123423316	0.0392	none	none	none	NA	K562	0	0	0	0	0	0	0	0	1	0	1	0	0	0	0	0	0	0	0	0	0	0	1	0	0	0	1	0	0	0	0	0	0
Juvenile_idiopathic_arthritis	rs1479924-A	rs11724582	chr4	123391464	0.0388	none	none	none	NA	none	0	0	0	0	0	0	0	0	0	0	0	0	0	0	0	0	0	0	0	0	0	0	0	0	0	0	0	0	0	0	0	0	0
Juvenile_idiopathic_arthritis	rs1479924-A	rs6823186	chr4	123325969	0.0382	none	ADAD1	none	NA	none	0	0	0	0	0	0	0	0	0	0	0	0	0	0	0	0	0	0	0	0	0	0	0	0	0	0	0	0	0	0	0	0	0
Juvenile_idiopathic_arthritis	rs1479924-A	rs4833833	chr4	123462620	0.0303	none	none	none	NA	CD25-_IL17+_Th17_stim	0	0	0	0	0	0	0	0	1	0	1	1	1	1	1	0	1	0	0	1	0	0	0	0	0	0	0	0	0	0	0	1	0
Juvenile_idiopathic_arthritis	rs1479924-A	rs11736927	chr4	123410252	0.0295	none	none	none	NA	none	0	0	0	0	0	0	0	0	0	0	0	0	0	0	0	0	0	0	0	0	0	0	0	0	0	0	0	0	0	0	0	0	0
Juvenile_idiopathic_arthritis	rs1479924-A	rs7662182	chr4	123498431	0.0295	none	none	none	NA	Th1	1	1	1	1	1	1	1	1	1	1	1	1	1	1	1	1	0	0	0	0	0	0	0	0	0	0	0	0	0	0	0	0	0
Juvenile_idiopathic_arthritis	rs1479924-A	rs4572894	chr4	123472786	0.0275	none	none	none	NA	none	0	0	0	0	0	0	0	0	0	0	0	0	0	0	0	0	0	0	0	0	0	0	0	0	0	0	0	0	0	0	0	0	0
Juvenile_idiopathic_arthritis	rs1479924-A	rs13144509	chr4	123473487	0.0275	none	none	none	NA	Th1	0	0	0	0	0	0	0	0	1	0	1	1	1	1	0	0	0	0	0	0	1	0	0	0	0	0	0	0	0	0	0	0	0
Juvenile_idiopathic_arthritis	rs10213692-T	rs10213692	chr5	55442249	0.4084	none	ANKRD55	none	NA	none	0	0	0	0	0	0	0	0	0	0	0	0	0	0	0	0	0	0	0	0	0	0	0	0	0	0	0	0	0	0	0	0	0
Juvenile_idiopathic_arthritis	rs10213692-T	rs71624119	chr5	55440730	0.4084	none	ANKRD55	none	NA	CD25-_CD45RA+_naive	0	0	0	0	1	0	0	1	1	1	1	0	1	1	1	1	1	1	0	1	0	0	1	1	0	0	1	1	0	1	0	0	0
Juvenile_idiopathic_arthritis	rs10213692-T	rs6873385	chr5	55436851	0.0628	none	ANKRD55	none	NA	none	0	0	0	0	0	0	0	0	0	0	0	0	0	0	0	0	0	0	0	0	0	0	0	0	0	0	0	0	0	0	0	0	0
Juvenile_idiopathic_arthritis	rs10213692-T	rs10065637	chr5	55438851	0.0628	none	ANKRD55	none	NA	Th1	0	1	0	1	0	0	0	1	1	1	1	1	1	1	1	1	0	0	1	1	1	0	0	1	1	0	1	1	1	1	0	0	0
Juvenile_idiopathic_arthritis	rs10213692-T	rs6859219	chr5	55438580	0.0575	none	ANKRD55	none	NA	Th1	0	1	0	1	0	0	0	1	1	1	1	1	1	1	1	1	0	0	1	1	1	0	0	1	1	0	1	1	1	1	0	0	0
Juvenile_idiopathic_arthritis	rs27293-A	rs27293	chr5	96357178	0.0355	none	LNPEP	LNPEP	-	Th2	0	0	0	1	0	0	0	1	1	1	1	1	1	1	1	1	1	1	1	1	0	1	0	0	0	0	0	0	0	0	0	0	0
Juvenile_idiopathic_arthritis	rs27293-A	rs27289	chr5	96346278	0.0355	none	LNPEP	LNPEP	-	Th2	0	0	0	0	0	0	0	1	1	1	1	1	1	1	1	1	1	1	1	1	1	1	0	0	0	0	1	0	1	0	0	1	0
Juvenile_idiopathic_arthritis	rs27293-A	rs27290	chr5	96350088	0.0355	none	LNPEP	LNPEP	-	none	0	0	0	0	0	0	0	0	0	0	0	0	0	0	0	0	0	0	0	0	0	0	0	0	0	0	0	0	0	0	0	0	0
Juvenile_idiopathic_arthritis	rs27293-A	rs27295	chr5	96358687	0.0355	none	LNPEP	LNPEP	-	Th2	0	0	0	0	0	0	0	1	0	1	1	0	1	1	1	1	1	1	1	1	0	1	0	0	1	0	0	0	0	0	0	0	0
Juvenile_idiopathic_arthritis	rs6894249-A	rs6894249	chr5	131797547	0.8905	utr3	C5orf56	none	NA	B_Cell_Centroblast	0	1	0	0	0	1	0	1	1	1	1	1	1	1	0	1	1	1	1	1	1	1	0	1	1	1	1	1	0	1	1	0	0
Juvenile_idiopathic_arthritis	rs6894249-A	rs11745587	chr5	131796922	0.064	utr3	C5orf56	none	NA	B_Cell_Centroblast	0	1	0	0	0	1	0	1	1	1	1	1	1	1	0	1	1	1	1	1	1	1	0	1	1	1	1	1	0	1	1	0	0
Juvenile_idiopathic_arthritis	rs6946509-T	rs6946509	chr7	22809490	0.1794	none	none	none	NA	none	0	0	0	0	0	0	0	0	0	0	0	0	0	0	0	0	0	0	0	0	0	0	0	0	0	0	0	0	0	0	0	0	0
Juvenile_idiopathic_arthritis	rs6946509-T	rs7793125	chr7	22809160	0.0708	none	none	none	NA	none	0	0	0	0	0	0	0	0	0	0	0	0	0	0	0	0	0	0	0	0	0	0	0	0	0	0	0	0	0	0	0	0	0
Juvenile_idiopathic_arthritis	rs6946509-T	rs7808122	chr7	22798080	0.0513	none	none	none	NA	none	0	0	0	0	0	0	0	0	0	0	0	0	0	0	0	0	0	0	0	0	0	0	0	0	0	0	0	0	0	0	0	0	0
Juvenile_idiopathic_arthritis	rs6946509-T	rs4722177	chr7	22798531	0.0513	none	none	none	NA	none	0	0	0	0	0	0	0	0	0	0	0	0	0	0	0	0	0	0	0	0	0	0	0	0	0	0	0	0	0	0	0	0	0
Juvenile_idiopathic_arthritis	rs6946509-T	rs56061963	chr7	22800397	0.0485	none	none	none	NA	none	0	0	0	0	0	0	0	0	0	0	0	0	0	0	0	0	0	0	0	0	0	0	0	0	0	0	0	0	0	0	0	0	0
Juvenile_idiopathic_arthritis	rs6946509-T	rs28572733	chr7	22811384	0.0484	none	none	none	NA	none	0	0	0	0	0	0	0	0	0	0	0	0	0	0	0	0	0	0	0	0	0	0	0	0	0	0	0	0	0	0	0	0	0
Juvenile_idiopathic_arthritis	rs6946509-T	rs35779989	chr7	22800314	0.0434	none	none	none	NA	none	0	0	0	0	0	0	0	0	0	0	0	0	0	0	0	0	0	0	0	0	0	0	0	0	0	0	0	0	0	0	0	0	0
Juvenile_idiopathic_arthritis	rs6946509-T	rs1404006	chr7	22795077	0.0338	none	none	none	NA	none	0	0	0	0	0	0	0	0	0	0	0	0	0	0	0	0	0	0	0	0	0	0	0	0	0	0	0	0	0	0	0	0	0
Juvenile_idiopathic_arthritis	rs6946509-T	rs80156335	chr7	22810569	0.0309	none	none	none	NA	none	0	0	0	0	0	0	0	0	0	0	0	0	0	0	0	0	0	0	0	0	0	0	0	0	0	0	0	0	0	0	0	0	0
Juvenile_idiopathic_arthritis	rs6946509-T	rs2091115	chr7	22810166	0.0283	none	none	none	NA	none	0	0	0	0	0	0	0	0	0	0	0	0	0	0	0	0	0	0	0	0	0	0	0	0	0	0	0	0	0	0	0	0	0
Juvenile_idiopathic_arthritis	rs6946509-T	rs7787893	chr7	22774437	0.0277	none	none	none	NA	none	0	0	0	0	0	0	0	0	0	0	0	0	0	0	0	0	0	0	0	0	0	0	0	0	0	0	0	0	0	0	0	0	0
Juvenile_idiopathic_arthritis	rs73300638-C	rs73300638	chr7	28187344	0.2432	none	JAZF1	none	NA	none	0	0	0	0	0	0	0	0	0	0	0	0	0	0	0	0	0	0	0	0	0	0	0	0	0	0	0	0	0	0	0	0	0
Juvenile_idiopathic_arthritis	rs73300638-C	rs10260837	chr7	28181129	0.0534	none	JAZF1	none	NA	chondrogenic_dif_cells	1	0	0	1	0	0	0	0	0	1	1	1	0	1	1	0	1	1	1	0	0	0	0	0	0	0	0	1	1	0	1	1	1
Juvenile_idiopathic_arthritis	rs73300638-C	rs10280937	chr7	28182306	0.0534	none	JAZF1	none	NA	angular_gyrus	1	1	1	1	1	1	1	1	0	0	1	1	1	1	1	1	0	1	1	0	0	0	1	0	0	0	0	0	1	0	0	1	0
Juvenile_idiopathic_arthritis	rs73300638-C	rs10281214	chr7	28185544	0.0534	none	JAZF1	none	NA	Liver1	1	0	0	0	0	0	0	0	0	0	0	1	1	0	0	1	0	1	1	0	0	0	0	0	1	0	0	1	1	0	1	0	0
Juvenile_idiopathic_arthritis	rs73300638-C	rs7796417	chr7	28186119	0.0534	none	JAZF1	none	NA	none	0	0	0	0	0	0	0	0	0	0	0	0	0	0	0	0	0	0	0	0	0	0	0	0	0	0	0	0	0	0	0	0	0
Juvenile_idiopathic_arthritis	rs73300638-C	rs73089302	chr7	28187134	0.0534	none	JAZF1	none	NA	none	0	0	0	0	0	0	0	0	0	0	0	0	0	0	0	0	0	0	0	0	0	0	0	0	0	0	0	0	0	0	0	0	0
Juvenile_idiopathic_arthritis	rs73300638-C	rs10263857	chr7	28187284	0.0534	none	JAZF1	none	NA	none	0	0	0	0	0	0	0	0	0	0	0	0	0	0	0	0	0	0	0	0	0	0	0	0	0	0	0	0	0	0	0	0	0
Juvenile_idiopathic_arthritis	rs73300638-C	rs78693958	chr7	28187684	0.0534	none	JAZF1	none	NA	adult_CD20	0	0	0	0	1	0	0	0	0	1	0	0	1	0	0	0	0	1	1	0	1	0	0	0	1	0	0	1	1	0	0	0	0
Juvenile_idiopathic_arthritis	rs73300638-C	rs6945537	chr7	28187970	0.0534	none	JAZF1	none	NA	adult_CD20	0	0	0	0	1	0	0	0	0	1	0	0	1	0	0	0	0	1	1	0	1	0	0	0	1	0	0	1	1	0	0	0	0
Juvenile_idiopathic_arthritis	rs73300638-C	rs10276381	chr7	28190121	0.0534	none	JAZF1	none	NA	adult_CD20	1	1	0	0	1	1	1	0	0	1	1	0	1	1	1	0	0	1	1	1	1	0	0	0	0	0	0	1	1	0	0	0	0
Juvenile_idiopathic_arthritis	rs73300638-C	rs10255700	chr7	28220228	0.04	utr5	JAZF1-AS1	none	NA	GM12878	1	1	1	1	1	1	1	1	1	1	1	1	1	1	1	1	1	1	1	1	1	0	1	1	1	1	0	1	1	1	1	1	1
Juvenile_idiopathic_arthritis	rs73300638-C	rs28446389	chr7	28230401	0.0348	none	JAZF1-AS1	none	NA	none	0	0	0	0	0	0	0	0	0	0	0	0	0	0	0	0	0	0	0	0	0	0	0	0	0	0	0	0	0	0	0	0	0
Juvenile_idiopathic_arthritis	rs73300638-C	rs73300665	chr7	28227024	0.0303	none	JAZF1-AS1	none	NA	none	0	0	0	0	0	0	0	0	0	0	0	0	0	0	0	0	0	0	0	0	0	0	0	0	0	0	0	0	0	0	0	0	0
Juvenile_idiopathic_arthritis	rs7909519-T	rs7909519	chr10	6089841	0.3141	none	IL2RA	none	NA	CD25+_CD127-_Treg	0	0	0	0	0	0	0	1	1	1	1	1	1	1	1	0	0	0	1	1	0	0	1	0	1	0	0	0	0	0	0	0	0
Juvenile_idiopathic_arthritis	rs7909519-T	rs12722508	chr10	6088743	0.223	none	IL2RA	none	NA	Th0	0	0	0	0	0	0	0	1	1	1	1	1	1	1	1	1	0	1	1	1	1	0	1	1	1	0	0	0	0	0	0	0	0
Juvenile_idiopathic_arthritis	rs7909519-T	rs12722522	chr10	6078553	0.1103	none	IL2RA	none	NA	CD25+_CD127-_Treg	0	0	0	0	0	0	0	1	1	1	1	1	1	1	1	1	1	0	1	0	1	0	0	0	0	0	0	1	0	0	0	0	0
Juvenile_idiopathic_arthritis	rs7909519-T	rs12722496	chr10	6096667	0.0768	none	IL2RA	none	NA	CD25+_CD127-_Treg	1	1	1	1	0	1	1	1	1	1	1	1	1	1	1	0	1	1	1	1	1	1	1	1	1	1	0	1	0	1	1	0	0
Juvenile_idiopathic_arthritis	rs7909519-T	rs12722495	chr10	6097283	0.0766	none	IL2RA	none	NA	CD25+_CD127-_Treg	1	1	1	1	0	1	1	1	1	1	1	1	1	1	1	0	1	1	1	1	1	1	1	1	1	1	0	1	0	1	1	0	0
Juvenile_idiopathic_arthritis	rs7909519-T	rs12722563	chr10	6069561	0.0327	none	IL2RA	none	NA	CD25+_CD127-_Treg	0	0	0	0	0	0	0	1	1	1	1	1	1	0	1	0	0	0	0	1	1	0	0	0	0	0	0	0	0	0	0	0	0
Juvenile_idiopathic_arthritis	rs7909519-T	rs12722558	chr10	6070276	0.0291	none	IL2RA	none	NA	CD25+_CD127-_Treg	0	0	0	0	0	0	0	1	1	1	1	1	1	0	1	0	0	0	0	1	1	0	0	0	0	0	0	0	0	0	0	0	0
Juvenile_idiopathic_arthritis	rs7069750-C	rs7069750	chr10	90762376	0.1434	none	FAS	none	NA	CD25+_CD127-_Treg	1	1	1	1	0	1	1	1	1	1	1	1	1	1	1	1	1	1	1	1	1	1	0	1	1	1	0	1	1	1	1	1	1
Juvenile_idiopathic_arthritis	rs7069750-C	rs1926194	chr10	90760318	0.1434	none	FAS	none	NA	CD25+_CD127-_Treg	1	1	0	0	0	1	1	0	1	1	1	1	1	1	0	1	1	1	1	1	1	1	0	1	1	1	0	1	0	1	1	1	1
Juvenile_idiopathic_arthritis	rs7069750-C	rs1926193	chr10	90760606	0.1434	none	FAS	none	NA	CD25+_CD127-_Treg	1	1	1	1	1	1	1	1	1	1	1	1	1	1	1	1	1	1	1	1	1	1	1	1	1	1	0	1	1	1	1	1	1
Juvenile_idiopathic_arthritis	rs7069750-C	rs1926192	chr10	90760620	0.1434	none	FAS	none	NA	CD25+_CD127-_Treg	1	1	1	1	1	1	1	1	1	1	1	1	1	1	1	1	1	1	1	1	1	1	1	1	1	1	0	1	1	1	1	1	1
Juvenile_idiopathic_arthritis	rs7069750-C	rs2148287	chr10	90759772	0.0786	none	FAS	none	NA	CD25+_CD127-_Treg	1	1	0	0	0	1	1	0	1	1	1	1	1	1	0	1	1	1	1	1	1	1	0	1	1	1	0	1	0	1	1	1	1
Juvenile_idiopathic_arthritis	rs7069750-C	rs4406738	chr10	90760012	0.0786	none	FAS	none	NA	CD25+_CD127-_Treg	1	1	0	0	0	1	1	0	1	1	1	1	1	1	0	1	1	1	1	1	1	1	0	1	1	1	0	1	0	1	1	1	1
Juvenile_idiopathic_arthritis	rs7069750-C	rs2182408	chr10	90760107	0.0786	none	FAS	none	NA	CD25+_CD127-_Treg	1	1	0	0	0	1	1	0	1	1	1	1	1	1	0	1	1	1	1	1	1	1	0	1	1	1	0	1	0	1	1	1	1
Juvenile_idiopathic_arthritis	rs7069750-C	rs2147420	chr10	90759613	0.0653	none	FAS	none	NA	CD25+_CD127-_Treg	1	1	0	0	0	1	1	0	1	1	1	1	1	1	0	1	1	1	1	1	1	1	0	1	1	1	0	1	0	1	1	1	1
Juvenile_idiopathic_arthritis	rs7069750-C	rs4406737	chr10	90759724	0.0526	none	FAS	none	NA	CD25+_CD127-_Treg	1	1	0	0	0	1	1	0	1	1	1	1	1	1	0	1	1	1	1	1	1	1	0	1	1	1	0	1	0	1	1	1	1
Juvenile_idiopathic_arthritis	rs7069750-C	rs9658742	chr10	90764891	0.0463	none	FAS	none	NA	none	0	0	0	0	0	0	0	0	0	0	0	0	0	0	0	0	0	0	0	0	0	0	0	0	0	0	0	0	0	0	0	0	0
Juvenile_idiopathic_arthritis	rs7127214-C	rs7127214	chr11	36343693	0.1208	none	PRR5L	none	NA	none	0	0	0	0	0	0	0	0	0	0	0	0	0	0	0	0	0	0	0	0	0	0	0	0	0	0	0	0	0	0	0	0	0
Juvenile_idiopathic_arthritis	rs7127214-C	rs2218565	chr11	36336263	0.1208	none	PRR5L	none	NA	none	0	0	0	0	0	0	0	0	0	0	0	0	0	0	0	0	0	0	0	0	0	0	0	0	0	0	0	0	0	0	0	0	0
Juvenile_idiopathic_arthritis	rs7127214-C	rs10836534	chr11	36336464	0.1208	none	PRR5L	none	NA	none	0	0	0	0	0	0	0	0	0	0	0	0	0	0	0	0	0	0	0	0	0	0	0	0	0	0	0	0	0	0	0	0	0
Juvenile_idiopathic_arthritis	rs7127214-C	rs10768207	chr11	36336788	0.1208	none	PRR5L	none	NA	none	0	0	0	0	0	0	0	0	0	0	0	0	0	0	0	0	0	0	0	0	0	0	0	0	0	0	0	0	0	0	0	0	0
Juvenile_idiopathic_arthritis	rs7127214-C	rs3824946	chr11	36341743	0.0836	none	PRR5L	none	NA	none	0	0	0	0	0	0	0	0	0	0	0	0	0	0	0	0	0	0	0	0	0	0	0	0	0	0	0	0	0	0	0	0	0
Juvenile_idiopathic_arthritis	rs7127214-C	rs11033552	chr11	36348120	0.0714	none	PRR5L	none	NA	none	0	0	0	0	0	0	0	0	0	0	0	0	0	0	0	0	0	0	0	0	0	0	0	0	0	0	0	0	0	0	0	0	0
Juvenile_idiopathic_arthritis	rs7127214-C	rs10466394	chr11	36352698	0.0714	none	PRR5L	none	NA	AdiposeNuclei	0	0	0	1	1	0	0	0	0	0	0	0	0	0	0	0	1	0	0	0	0	0	0	0	0	1	0	0	0	0	0	0	0
Juvenile_idiopathic_arthritis	rs7127214-C	rs11033559	chr11	36356259	0.0714	none	PRR5L	none	NA	AdiposeNuclei	1	0	0	0	1	0	1	0	0	0	0	0	0	0	0	1	0	1	0	0	0	0	1	0	0	1	0	0	0	0	0	1	1
Juvenile_idiopathic_arthritis	rs7127214-C	rs10836537	chr11	36357257	0.0714	none	PRR5L	none	NA	none	0	0	0	0	0	0	0	0	0	0	0	0	0	0	0	0	0	0	0	0	0	0	0	0	0	0	0	0	0	0	0	0	0
Juvenile_idiopathic_arthritis	rs7127214-C	rs10836538	chr11	36365253	0.0571	none	PRR5L	none	NA	Th1	1	1	1	1	1	1	1	1	0	0	0	0	1	1	1	0	0	1	0	0	0	1	1	0	0	0	0	0	0	0	0	0	0
Juvenile_idiopathic_arthritis	rs7127214-C	rs4755450	chr11	36363575	0.0441	none	PRR5L	none	NA	cingulate_gyrus	1	1	1	1	1	1	1	0	1	0	0	0	0	0	0	0	0	0	1	0	0	0	0	0	0	0	0	0	0	1	0	0	0
Juvenile_idiopathic_arthritis	rs10849448-A	rs10849448	chr12	6493351	0.4362	none	LTBR	none	NA	kidney	1	1	1	1	1	1	1	1	0	1	1	1	1	1	1	0	1	1	1	1	0	1	1	1	1	1	1	1	1	1	1	1	1
Juvenile_idiopathic_arthritis	rs10849448-A	rs2364480	chr12	6495275	0.0702	none	LTBR	none	NA	colonic_mucosa	0	0	0	1	1	0	1	0	0	1	0	0	0	1	1	0	1	1	0	0	1	1	1	1	0	1	1	1	1	1	1	1	1
Juvenile_idiopathic_arthritis	rs10849448-A	rs2364481	chr12	6497260	0.0702	none	LTBR	none	NA	Pancreatic_Islets	1	0	1	0	1	1	1	1	0	0	0	0	0	0	1	0	1	1	0	0	1	1	0	1	0	1	1	1	1	1	0	1	1
Juvenile_idiopathic_arthritis	rs10849448-A	rs4301834	chr12	6500843	0.062	none	none	none	NA	colonic_mucosa	0	0	0	0	0	0	0	0	1	0	0	1	0	0	0	0	1	1	0	0	0	1	1	1	1	0	1	1	1	1	0	0	1
Juvenile_idiopathic_arthritis	rs10849448-A	rs11064159	chr12	6502361	0.0547	none	none	none	NA	colonic_mucosa	0	0	0	0	1	0	0	0	0	0	0	0	0	1	0	0	1	1	0	0	1	1	1	1	1	1	0	1	1	0	1	0	1
Juvenile_idiopathic_arthritis	rs10849448-A	rs10744706	chr12	6503218	0.0547	none	none	none	NA	CD45RO_CD8	0	1	0	0	1	1	1	1	0	0	0	1	0	1	0	0	1	1	0	1	0	1	1	1	1	1	1	1	1	1	0	1	1
Juvenile_idiopathic_arthritis	rs10849448-A	rs9668139	chr12	6504098	0.0513	none	none	none	NA	chondrogenic_dif_cells	0	0	1	1	1	1	1	1	0	1	0	1	0	0	0	0	1	1	0	0	0	0	1	1	1	1	1	1	1	1	1	1	1
Juvenile_idiopathic_arthritis	rs10849448-A	rs9669611	chr12	6503786	0.0431	none	none	none	NA	chondrogenic_dif_cells	0	0	1	1	1	1	1	1	0	1	0	1	0	0	0	0	1	1	0	0	0	0	1	1	1	1	1	1	1	1	1	1	1
Juvenile_idiopathic_arthritis	rs10849448-A	rs12425441	chr12	6506390	0.0316	none	none	none	NA	chondrogenic_dif_cells	0	0	0	0	0	0	0	0	0	0	0	1	0	0	0	0	0	0	0	0	0	0	1	0	0	0	0	1	1	0	0	0	1
Juvenile_idiopathic_arthritis	rs10849448-A	rs2364484	chr12	6511996	0.0316	none	none	none	NA	none	0	0	0	0	0	0	0	0	0	0	0	0	0	0	0	0	0	0	0	0	0	0	0	0	0	0	0	0	0	0	0	0	0
Juvenile_idiopathic_arthritis	rs10849448-A	rs10774430	chr12	6504773	0.03	none	none	none	NA	chondrogenic_dif_cells	0	0	0	0	1	0	1	0	1	0	0	1	0	1	0	1	1	0	0	0	0	0	0	1	1	1	1	1	1	0	0	0	1
Juvenile_idiopathic_arthritis	rs7137828-C	rs7137828	chr12	111932800	0.652	none	ATXN2	none	NA	none	0	0	0	0	0	0	0	0	0	0	0	0	0	0	0	0	0	0	0	0	0	0	0	0	0	0	0	0	0	0	0	0	0
Juvenile_idiopathic_arthritis	rs7137828-C	rs3184504	chr12	111884608	0.0757	missense	SH2B3	none	NA	Pancreatic_Islets	1	1	1	1	1	1	1	1	1	1	1	1	1	1	1	1	1	1	1	1	1	1	1	1	1	1	1	1	1	1	1	1	1
Juvenile_idiopathic_arthritis	rs7137828-C	rs10774625	chr12	111910219	0.0658	none	ATXN2	none	NA	none	0	0	0	0	0	0	0	0	0	0	0	0	0	0	0	0	0	0	0	0	0	0	0	0	0	0	0	0	0	0	0	0	0
Juvenile_idiopathic_arthritis	rs7137828-C	rs653178	chr12	112007756	0.0557	none	ATXN2	none	NA	HSMM-myotube	1	1	1	1	1	1	1	1	1	1	1	0	1	1	0	1	1	1	1	1	0	1	1	1	1	1	1	1	1	1	1	1	1
Juvenile_idiopathic_arthritis	rs7137828-C	rs4766578	chr12	111904371	0.0539	none	ATXN2	none	NA	none	0	0	0	0	0	0	0	0	0	0	0	0	0	0	0	0	0	0	0	0	0	0	0	0	0	0	0	0	0	0	0	0	0
Juvenile_idiopathic_arthritis	rs7137828-C	rs7310615	chr12	111865049	0.0393	none	SH2B3	none	NA	colonic_mucosa	1	1	1	1	1	1	1	1	1	1	1	1	1	1	1	1	1	1	1	1	1	1	1	1	1	1	0	1	1	1	1	1	1
Juvenile_idiopathic_arthritis	rs7137828-C	rs597808	chr12	111973358	0.0349	none	ATXN2	none	NA	none	0	0	0	0	0	0	0	0	0	0	0	0	0	0	0	0	0	0	0	0	0	0	0	0	0	0	0	0	0	0	0	0	0
Juvenile_idiopathic_arthritis	rs9532434-C	rs9532434	chr13	40355913	0.0604	none	COG6	none	NA	chondrogenic_dif_cells	0	0	0	0	0	0	0	0	1	0	1	0	0	0	1	1	0	0	0	0	0	0	0	1	1	0	0	0	0	0	0	0	1
Juvenile_idiopathic_arthritis	rs9532434-C	rs7993214	chr13	40350912	0.0604	none	COG6	none	NA	chondrogenic_dif_cells	0	0	0	0	0	0	0	1	1	1	1	1	1	1	1	1	1	0	1	1	1	0	0	0	1	1	0	0	1	0	1	1	1
Juvenile_idiopathic_arthritis	rs9532434-C	rs12876235	chr13	40351094	0.0604	none	COG6	none	NA	chondrogenic_dif_cells	0	0	0	0	0	0	0	1	1	1	1	1	1	1	1	1	1	0	1	1	1	0	0	0	1	1	0	0	1	0	1	1	1
Juvenile_idiopathic_arthritis	rs9532434-C	rs9532430	chr13	40351341	0.0604	none	COG6	none	NA	chondrogenic_dif_cells	0	0	0	0	0	0	0	1	1	1	1	1	1	1	1	1	1	0	1	1	1	0	0	0	1	1	0	0	1	0	1	1	1
Juvenile_idiopathic_arthritis	rs9532434-C	rs9532433	chr13	40352671	0.0604	none	COG6	none	NA	CD25-_IL17-_Th_stim_MACS	0	0	0	0	0	0	0	1	0	1	1	1	1	1	1	1	1	0	0	1	1	0	0	0	1	0	0	0	1	0	1	1	1
Juvenile_idiopathic_arthritis	rs9532434-C	rs9548932	chr13	40353230	0.0604	none	COG6	none	NA	CD25-_IL17-_Th_stim_MACS	0	0	0	0	0	0	0	1	1	1	1	1	1	0	1	1	1	0	0	0	1	0	0	0	0	0	0	0	0	0	1	1	1
Juvenile_idiopathic_arthritis	rs9532434-C	rs12872801	chr13	40354200	0.0604	none	COG6	none	NA	CD45RA_CD8	0	0	0	0	0	0	0	1	0	1	1	1	0	0	0	1	1	0	0	0	0	0	0	0	0	0	0	0	0	0	1	1	1
Juvenile_idiopathic_arthritis	rs9532434-C	rs9603612	chr13	40334852	0.0422	none	COG6	none	NA	none	0	0	0	0	0	0	0	0	0	0	0	0	0	0	0	0	0	0	0	0	0	0	0	0	0	0	0	0	0	0	0	0	0
Juvenile_idiopathic_arthritis	rs9532434-C	rs12875311	chr13	40342557	0.0422	none	COG6	none	NA	AdiposeNuclei	0	0	1	1	0	1	0	0	0	0	0	0	0	1	1	1	0	0	1	0	1	1	0	1	0	1	0	0	0	0	0	0	1
Juvenile_idiopathic_arthritis	rs9532434-C	rs7319041	chr13	40345356	0.0422	none	COG6	none	NA	AdiposeNuclei	0	0	0	0	0	1	0	1	0	0	0	0	0	0	0	0	0	0	0	0	1	1	0	0	1	1	0	1	0	0	0	0	0
Juvenile_idiopathic_arthritis	rs9532434-C	rs9603608	chr13	40318819	0.0364	none	COG6	none	NA	none	0	0	0	0	0	0	0	0	0	0	0	0	0	0	0	0	0	0	0	0	0	0	0	0	0	0	0	0	0	0	0	0	0
Juvenile_idiopathic_arthritis	rs9532434-C	rs28635831	chr13	40319954	0.0364	none	COG6	none	NA	none	0	0	0	0	0	0	0	0	0	0	0	0	0	0	0	0	0	0	0	0	0	0	0	0	0	0	0	0	0	0	0	0	0
Juvenile_idiopathic_arthritis	rs9532434-C	rs34394770	chr13	40333369	0.0364	none	COG6	none	NA	none	0	0	0	0	0	0	0	0	0	0	0	0	0	0	0	0	0	0	0	0	0	0	0	0	0	0	0	0	0	0	0	0	0
Juvenile_idiopathic_arthritis	rs9532434-C	rs9943	chr13	40326282	0.0324	utr3	COG6	none	NA	none	0	0	0	0	0	0	0	0	0	0	0	0	0	0	0	0	0	0	0	0	0	0	0	0	0	0	0	0	0	0	0	0	0
Juvenile_idiopathic_arthritis	rs9532434-C	rs60120504	chr13	40336770	0.0324	none	COG6	none	NA	none	0	0	0	0	0	0	0	0	0	0	0	0	0	0	0	0	0	0	0	0	0	0	0	0	0	0	0	0	0	0	0	0	0
Juvenile_idiopathic_arthritis	rs9532434-C	rs7320598	chr13	40345466	0.0323	none	COG6	none	NA	AdiposeNuclei	0	0	0	0	0	1	0	1	0	0	0	0	0	0	0	0	0	0	0	0	1	1	0	0	1	1	0	1	0	0	0	0	0
Juvenile_idiopathic_arthritis	rs9532434-C	rs8002731	chr13	40362229	0.0293	none	COG6	none	NA	HSMM-myotube	0	0	0	0	0	0	0	0	1	0	0	1	0	0	1	0	0	0	0	0	0	0	0	1	0	1	0	0	0	0	1	0	1
Juvenile_idiopathic_arthritis	rs34132030-C	rs34132030	chr13	43056036	0.1869	none	none	none	NA	none	0	0	0	0	0	0	0	0	0	0	0	0	0	0	0	0	0	0	0	0	0	0	0	0	0	0	0	0	0	0	0	0	0
Juvenile_idiopathic_arthritis	rs34132030-C	rs12876349	chr13	43057206	0.0727	none	none	none	NA	none	0	0	0	0	0	0	0	0	0	0	0	0	0	0	0	0	0	0	0	0	0	0	0	0	0	0	0	0	0	0	0	0	0
Juvenile_idiopathic_arthritis	rs34132030-C	rs12876545	chr13	43057478	0.0727	none	none	none	NA	none	0	0	0	0	0	0	0	0	0	0	0	0	0	0	0	0	0	0	0	0	0	0	0	0	0	0	0	0	0	0	0	0	0
Juvenile_idiopathic_arthritis	rs34132030-C	rs9594770	chr13	43058031	0.0506	none	none	none	NA	none	0	0	0	0	0	0	0	0	0	0	0	0	0	0	0	0	0	0	0	0	0	0	0	0	0	0	0	0	0	0	0	0	0
Juvenile_idiopathic_arthritis	rs34132030-C	rs2324919	chr13	43061784	0.0502	none	none	none	NA	NH-Osteoblast	0	0	0	0	0	0	0	0	1	0	1	0	0	0	0	0	1	1	0	1	0	1	0	0	0	0	0	1	0	0	1	1	1
Juvenile_idiopathic_arthritis	rs34132030-C	rs66749983	chr13	43063831	0.0502	none	none	none	NA	none	0	0	0	0	0	0	0	0	0	0	0	0	0	0	0	0	0	0	0	0	0	0	0	0	0	0	0	0	0	0	0	0	0
Juvenile_idiopathic_arthritis	rs34132030-C	rs4942131	chr13	43058974	0.049	none	none	none	NA	none	0	0	0	0	0	0	0	0	0	0	0	0	0	0	0	0	0	0	0	0	0	0	0	0	0	0	0	0	0	0	0	0	0
Juvenile_idiopathic_arthritis	rs34132030-C	rs9533127	chr13	43060658	0.0489	none	none	none	NA	NH-Osteoblast	0	0	0	0	0	0	0	0	1	0	0	0	0	0	1	0	0	0	0	0	0	1	0	0	0	1	0	0	0	1	0	1	1
Juvenile_idiopathic_arthritis	rs34132030-C	rs9525630	chr13	43060784	0.0488	none	none	none	NA	NH-Osteoblast	0	0	0	0	0	0	0	0	1	0	0	0	0	0	1	0	0	0	0	0	0	1	0	0	0	1	0	0	0	1	0	1	1
Juvenile_idiopathic_arthritis	rs34132030-C	rs9533129	chr13	43066117	0.0431	none	none	none	NA	none	0	0	0	0	0	0	0	0	0	0	0	0	0	0	0	0	0	0	0	0	0	0	0	0	0	0	0	0	0	0	0	0	0
Juvenile_idiopathic_arthritis	rs34132030-C	rs9533130	chr13	43066523	0.043	none	none	none	NA	none	0	0	0	0	0	0	0	0	0	0	0	0	0	0	0	0	0	0	0	0	0	0	0	0	0	0	0	0	0	0	0	0	0
Juvenile_idiopathic_arthritis	rs34132030-C	rs6561054	chr13	43059882	0.0407	none	none	none	NA	none	0	0	0	0	0	0	0	0	0	0	0	0	0	0	0	0	0	0	0	0	0	0	0	0	0	0	0	0	0	0	0	0	0
Juvenile_idiopathic_arthritis	rs3825568-C	rs3825568	chr14	69260588	0.2374	utr5	ZFP36L1	none	NA	Liver1	1	1	1	1	1	1	1	1	1	1	1	1	1	1	1	1	1	1	1	1	1	1	1	1	1	1	1	1	1	1	1	1	1
Juvenile_idiopathic_arthritis	rs3825568-C	rs11158763	chr14	69253343	0.098	none	none	ZFP36L1	+	Liver1	1	1	1	1	1	1	1	1	1	1	1	1	1	1	1	1	1	1	1	1	1	1	1	1	1	1	1	1	1	1	1	1	1
Juvenile_idiopathic_arthritis	rs3825568-C	rs12434551	chr14	69253364	0.098	none	none	ZFP36L1	+	Liver1	1	1	1	1	1	1	1	1	1	1	1	1	1	1	1	1	1	1	1	1	1	1	1	1	1	1	1	1	1	1	1	1	1
Juvenile_idiopathic_arthritis	rs3825568-C	rs4902647	chr14	69254191	0.098	none	none	ZFP36L1	+	Liver1	1	1	1	1	1	1	1	1	1	1	1	1	1	1	1	1	1	1	1	1	1	1	1	1	1	1	1	1	1	1	1	1	1
Juvenile_idiopathic_arthritis	rs3825568-C	rs12435329	chr14	69250891	0.079	none	none	ZFP36L1	+	HepG2	1	1	1	0	1	1	1	1	1	1	1	1	1	1	1	1	1	1	1	1	1	0	1	1	1	1	1	1	1	1	1	1	1
Juvenile_idiopathic_arthritis	rs3825568-C	rs10711370	chr14	69253798	0.0696	none	none	none	NA	Liver1	1	1	1	1	1	1	1	1	1	1	1	1	1	1	1	1	1	1	1	1	1	1	1	1	1	1	1	1	1	1	1	1	1
Juvenile_idiopathic_arthritis	rs3825568-C	rs12889006	chr14	69260563	0.0696	utr5	ZFP36L1	none	NA	Liver1	1	1	1	1	1	1	1	1	1	1	1	1	1	1	1	1	1	1	1	1	1	1	1	1	1	1	1	1	1	1	1	1	1
Juvenile_idiopathic_arthritis	rs11074967-C	rs11074967	chr16	11471414	0.6871	none	none	none	NA	none	0	0	0	0	0	0	0	0	0	0	0	0	0	0	0	0	0	0	0	0	0	0	0	0	0	0	0	0	0	0	0	0	0
Juvenile_idiopathic_arthritis	rs11074967-C	rs11649678	chr16	11474750	0.0459	none	none	none	NA	none	0	0	0	0	0	0	0	0	0	0	0	0	0	0	0	0	0	0	0	0	0	0	0	0	0	0	0	0	0	0	0	0	0
Juvenile_idiopathic_arthritis	rs11074967-C	rs8056901	chr16	11476225	0.0442	none	none	none	NA	none	0	0	0	0	0	0	0	0	0	0	0	0	0	0	0	0	0	0	0	0	0	0	0	0	0	0	0	0	0	0	0	0	0
Juvenile_idiopathic_arthritis	rs11074967-C	rs12931474	chr16	11476239	0.0442	none	none	none	NA	none	0	0	0	0	0	0	0	0	0	0	0	0	0	0	0	0	0	0	0	0	0	0	0	0	0	0	0	0	0	0	0	0	0
Juvenile_idiopathic_arthritis	rs11074967-C	rs12597615	chr16	11477030	0.0422	none	none	none	NA	none	0	0	0	0	0	0	0	0	0	0	0	0	0	0	0	0	0	0	0	0	0	0	0	0	0	0	0	0	0	0	0	0	0
Juvenile_idiopathic_arthritis	rs11074967-C	rs7203055	chr16	11473656	0.0401	none	none	none	NA	Th1	0	0	0	0	0	0	0	0	1	1	0	1	1	1	1	1	1	1	0	1	1	1	1	0	1	0	1	0	1	1	1	1	1
Juvenile_idiopathic_arthritis	rs11074967-C	rs12597485	chr16	11477068	0.0382	none	none	none	NA	none	0	0	0	0	0	0	0	0	0	0	0	0	0	0	0	0	0	0	0	0	0	0	0	0	0	0	0	0	0	0	0	0	0
Juvenile_idiopathic_arthritis	rs2847293-A	rs2847293	chr18	12782448	0.11	none	none	none	NA	none	0	0	0	0	0	0	0	0	0	0	0	0	0	0	0	0	0	0	0	0	0	0	0	0	0	0	0	0	0	0	0	0	0
Juvenile_idiopathic_arthritis	rs2847293-A	rs34920518	chr18	12783086	0.0734	none	none	none	NA	none	0	0	0	0	0	0	0	0	0	0	0	0	0	0	0	0	0	0	0	0	0	0	0	0	0	0	0	0	0	0	0	0	0
Juvenile_idiopathic_arthritis	rs2847293-A	rs2542151	chr18	12779947	0.0706	none	none	none	NA	none	0	0	0	0	0	0	0	0	0	0	0	0	0	0	0	0	0	0	0	0	0	0	0	0	0	0	0	0	0	0	0	0	0
Juvenile_idiopathic_arthritis	rs2847293-A	rs2542150	chr18	12779763	0.0692	none	none	none	NA	none	0	0	0	0	0	0	0	0	0	0	0	0	0	0	0	0	0	0	0	0	0	0	0	0	0	0	0	0	0	0	0	0	0
Juvenile_idiopathic_arthritis	rs2847293-A	rs2847278	chr18	12778715	0.0679	none	none	none	NA	none	0	0	0	0	0	0	0	0	0	0	0	0	0	0	0	0	0	0	0	0	0	0	0	0	0	0	0	0	0	0	0	0	0
Juvenile_idiopathic_arthritis	rs2847293-A	rs2847260	chr18	12775591	0.0664	none	none	none	NA	CD45RA_CD8	0	0	0	0	0	0	0	1	1	1	1	1	1	1	1	1	1	0	0	0	0	1	1	0	0	0	1	1	0	0	1	0	0
Juvenile_idiopathic_arthritis	rs2847293-A	rs2847280	chr18	12779342	0.0661	none	none	none	NA	none	0	0	0	0	0	0	0	0	0	0	0	0	0	0	0	0	0	0	0	0	0	0	0	0	0	0	0	0	0	0	0	0	0
Juvenile_idiopathic_arthritis	rs2847293-A	rs888270	chr18	12774894	0.0634	none	none	none	NA	CD45RA_CD8	0	0	0	0	0	0	0	1	1	1	1	1	1	1	1	1	1	0	0	0	0	1	1	0	0	0	1	1	0	0	1	0	0
Juvenile_idiopathic_arthritis	rs2847293-A	rs11663253	chr18	12789556	0.0517	none	PTPN2	none	NA	none	0	0	0	0	0	0	0	0	0	0	0	0	0	0	0	0	0	0	0	0	0	0	0	0	0	0	0	0	0	0	0	0	0
Juvenile_idiopathic_arthritis	rs2847293-A	rs45450798	chr18	12792940	0.0484	utr3	PTPN2	none	NA	none	0	0	0	0	0	0	0	0	0	0	0	0	0	0	0	0	0	0	0	0	0	0	0	0	0	0	0	0	0	0	0	0	0
Juvenile_idiopathic_arthritis	rs2847293-A	rs1893217	chr18	12809340	0.0447	none	PTPN2	none	NA	none	0	0	0	0	0	0	0	0	0	0	0	0	0	0	0	0	0	0	0	0	0	0	0	0	0	0	0	0	0	0	0	0	0
Juvenile_idiopathic_arthritis	rs2847293-A	rs2542147	chr18	12775851	0.0375	none	none	none	NA	CD45RA_CD8	0	0	0	0	0	0	0	1	1	1	1	1	1	1	1	1	1	0	0	0	0	0	0	0	0	0	1	0	0	0	0	0	0
Juvenile_idiopathic_arthritis	rs2847293-A	rs2542148	chr18	12777573	0.0375	none	none	none	NA	none	0	0	0	0	0	0	0	0	0	0	0	0	0	0	0	0	0	0	0	0	0	0	0	0	0	0	0	0	0	0	0	0	0
Juvenile_idiopathic_arthritis	rs2847293-A	rs2542149	chr18	12779018	0.0375	none	none	none	NA	none	0	0	0	0	0	0	0	0	0	0	0	0	0	0	0	0	0	0	0	0	0	0	0	0	0	0	0	0	0	0	0	0	0
Juvenile_idiopathic_arthritis	rs34536443-C	rs34536443	chr19	10463118	0.9166	missense	TYK2	none	NA	Liver1	0	0	1	0	1	1	1	0	0	1	0	0	1	0	1	0	0	1	1	0	0	0	0	1	1	1	0	1	1	1	0	0	0
Juvenile_idiopathic_arthritis	rs34536443-C	rs144309607	chr19	10492274	0.0575	none	none	none	NA	K562	1	1	1	1	1	1	1	1	1	1	1	1	1	1	1	1	1	1	1	1	1	1	1	1	1	1	1	1	1	1	1	1	1
Juvenile_idiopathic_arthritis	rs8129030-A	rs8129030	chr21	36712588	0.6221	none	RUNX1	none	NA	none	0	0	0	0	0	0	0	0	0	0	0	0	0	0	0	0	0	0	0	0	0	0	0	0	0	0	0	0	0	0	0	0	0
Juvenile_idiopathic_arthritis	rs8129030-A	rs9979383	chr21	36715761	0.2641	none	RUNX1	none	NA	CD25-_IL17+_Th17_stim	0	0	0	0	0	0	0	1	1	1	1	1	1	1	1	1	1	1	1	1	1	1	1	0	1	0	0	0	0	0	0	1	0
Juvenile_idiopathic_arthritis	rs8129030-A	rs8133843	chr21	36738242	0.0713	none	RUNX1	none	NA	HSMM-myotube	0	0	0	0	0	0	0	0	0	0	0	0	0	0	0	0	0	0	0	0	1	0	0	0	0	1	0	0	0	0	1	1	1
Juvenile_idiopathic_arthritis	rs8129030-A	rs2205049	chr21	36695909	0.036	none	RUNX1	none	NA	HSMM-myotube	1	1	0	0	1	0	1	0	0	0	0	0	0	1	1	1	0	0	0	1	0	0	1	1	0	1	0	1	1	0	1	1	1
Juvenile_idiopathic_arthritis	rs2266959-A	rs2266959	chr22	21922904	0.0309	none	UBE2L3	none	NA	K562	1	1	1	1	1	1	1	1	1	1	1	1	1	1	1	1	1	1	1	1	1	1	1	1	1	1	1	1	1	1	1	1	1
Juvenile_idiopathic_arthritis	rs2266959-A	rs59391722	chr22	21920817	0.0309	none	none	none	NA	K562	0	0	0	0	0	0	0	1	1	1	0	0	0	1	1	1	1	0	1	0	1	1	1	0	0	1	0	1	1	0	0	0	0
Juvenile_idiopathic_arthritis	rs2266959-A	rs11089620	chr22	21922456	0.0309	none	UBE2L3	none	NA	K562	1	1	1	1	1	1	1	1	1	1	1	1	1	1	1	1	1	1	1	1	1	1	1	1	1	1	1	1	1	1	1	1	1
Juvenile_idiopathic_arthritis	rs2266959-A	rs73166619	chr22	21930093	0.0309	none	UBE2L3	none	NA	Pancreatic_Islets	0	0	0	0	1	0	0	1	1	1	1	1	1	0	0	1	1	0	1	1	1	1	1	0	0	1	0	0	1	0	0	1	1
Juvenile_idiopathic_arthritis	rs2266959-A	rs5754166	chr22	21930777	0.0309	none	UBE2L3	none	NA	Pancreatic_Islets	0	0	0	0	1	0	0	1	1	1	1	1	1	0	0	1	1	0	1	1	1	1	1	0	0	1	0	0	1	0	0	1	1
Juvenile_idiopathic_arthritis	rs2284033-G	rs2284033	chr22	37534034	0.2746	none	IL2RB	none	NA	CD25-_IL17+_Th17_stim	0	0	0	0	0	0	0	1	1	1	1	1	1	1	1	1	1	0	0	1	0	0	0	0	0	0	0	0	0	0	0	0	0
Juvenile_idiopathic_arthritis	rs2284033-G	rs228958	chr22	37533795	0.134	none	IL2RB	none	NA	CD25-_IL17+_Th17_stim	0	0	0	0	0	0	0	1	1	1	1	1	1	1	1	1	1	0	0	1	0	0	0	0	0	0	0	0	0	0	0	0	0
Juvenile_idiopathic_arthritis	rs2284033-G	rs228957	chr22	37533786	0.098	none	IL2RB	none	NA	CD25-_IL17+_Th17_stim	0	0	0	0	0	0	0	1	1	1	1	1	1	1	1	1	1	0	0	1	0	0	0	0	0	0	0	0	0	0	0	0	0
Juvenile_idiopathic_arthritis	rs2284033-G	rs228954	chr22	37532665	0.0914	none	IL2RB	none	NA	CD25+_CD127-_Treg	0	0	0	0	0	0	0	1	1	1	1	1	1	0	0	1	1	0	0	0	0	0	0	0	0	0	0	0	0	0	0	0	0
Juvenile_idiopathic_arthritis	rs2284033-G	rs228960	chr22	37534947	0.076	none	IL2RB	none	NA	CD25-_IL17+_Th17_stim	0	0	0	0	0	0	0	1	1	1	1	1	1	1	1	1	1	0	1	1	1	0	0	0	0	0	0	1	0	0	1	0	0
Juvenile_idiopathic_arthritis	rs2284033-G	rs228953	chr22	37531436	0.0755	synonymous	IL2RB	none	NA	CD25+_CD127-_Treg	0	0	0	0	0	0	0	1	1	1	1	1	1	1	0	1	0	0	0	1	0	0	0	0	0	0	0	1	0	0	0	0	0
Juvenile_idiopathic_arthritis	rs2284033-G	rs228955	chr22	37532699	0.0635	none	IL2RB	none	NA	CD25+_CD127-_Treg	0	0	0	0	0	0	0	1	1	1	1	1	1	0	0	1	1	0	0	0	0	0	0	0	0	0	0	0	0	0	0	0	0
Juvenile_idiopathic_arthritis	rs2284033-G	rs228965	chr22	37537058	0.0512	none	IL2RB	none	NA	CD25-_IL17+_Th17_stim	0	0	0	0	0	0	0	1	1	1	1	1	1	1	1	0	1	0	0	1	0	0	0	0	0	0	0	0	0	0	0	0	0
Juvenile_idiopathic_arthritis	rs2284033-G	rs228963	chr22	37535948	0.0485	none	IL2RB	none	NA	CD25-_IL17-_Th_stim_MACS	0	0	0	0	0	0	0	1	1	1	1	1	1	1	1	1	1	0	0	1	1	1	0	0	0	0	0	1	0	0	1	0	0
Juvenile_idiopathic_arthritis	rs2284033-G	rs2543537	chr22	37531117	0.0417	none	IL2RB	none	NA	CD25+_CD127-_Treg	0	0	0	0	0	0	0	1	0	1	1	1	1	1	1	0	1	0	0	1	1	0	0	0	0	0	0	1	1	0	0	0	0
Juvenile_idiopathic_arthritis	rs2284033-G	rs228966	chr22	37537514	0.0378	none	IL2RB	none	NA	CD25+_CD127-_Treg	0	0	0	0	0	0	0	1	1	1	1	1	1	0	1	1	0	0	0	1	0	0	0	0	0	0	0	1	0	0	0	0	0
Systemic_sclerosis	rs2056626	rs2056626	chr1	167420425	0.2032	none	CD247	none	NA	Th1	0	0	0	0	0	0	0	1	1	1	1	1	1	1	1	1	1	0	0	1	0	0	1	1	1	0	0	0	0	1	0	0	0
Systemic_sclerosis	rs2056626	rs2988279	chr1	167419839	0.1192	none	CD247	none	NA	CD25+_CD127-_Treg	0	0	0	0	0	0	0	1	1	1	1	1	1	1	1	1	1	0	1	1	0	0	0	1	0	0	0	1	0	0	0	0	0
Systemic_sclerosis	rs2056626	rs1773560	chr1	167421763	0.1192	none	CD247	none	NA	Th0	0	0	0	0	0	0	0	1	1	1	1	1	1	1	1	1	0	0	0	1	0	0	1	0	0	0	0	1	0	1	0	0	0
Systemic_sclerosis	rs2056626	rs3108155	chr1	167422057	0.1192	none	CD247	none	NA	Th0	0	0	0	0	0	0	0	1	1	1	1	1	1	1	1	1	0	0	0	1	0	0	1	0	0	0	0	1	0	1	0	0	0
Systemic_sclerosis	rs2056626	rs201260989	chr1	167422234	0.0518	none	CD247	none	NA	Th0	0	0	0	0	0	0	0	1	1	1	1	1	1	1	1	1	0	0	0	1	0	0	1	0	0	0	0	1	0	1	0	0	0
Systemic_sclerosis	rs2056626	rs2056625	chr1	167420299	0.0329	none	CD247	CD247	-	Th1	0	0	0	0	0	0	0	1	1	1	1	1	1	1	1	1	1	0	0	1	0	0	1	1	1	0	0	0	0	1	0	0	0
Systemic_sclerosis	rs2056626	rs1773561	chr1	167421951	0.031	none	CD247	CD247	-	Th0	0	0	0	0	0	0	0	1	1	1	1	1	1	1	1	1	0	0	0	1	0	0	1	0	0	0	0	1	0	1	0	0	0
Systemic_sclerosis	rs2056626	rs2949669	chr1	167417884	0.0293	none	CD247	CD247	-	Th2	0	0	0	0	0	0	0	1	1	1	1	1	1	1	1	1	1	1	1	1	1	1	1	1	1	0	0	1	0	1	0	0	0
Systemic_sclerosis	rs7574865-T	rs7574865	chr2	191964633	0.18	none	STAT4	none	NA	none	0	0	0	0	0	0	0	0	0	0	0	0	0	0	0	0	0	0	0	0	0	0	0	0	0	0	0	0	0	0	0	0	0
Systemic_sclerosis	rs7574865-T	rs7568275	chr2	191966452	0.18	none	STAT4	none	NA	none	0	0	0	0	0	0	0	0	0	0	0	0	0	0	0	0	0	0	0	0	0	0	0	0	0	0	0	0	0	0	0	0	0
Systemic_sclerosis	rs7574865-T	rs4274624	chr2	191958656	0.105	none	STAT4	none	NA	none	0	0	0	0	0	0	0	0	0	0	0	0	0	0	0	0	0	0	0	0	0	0	0	0	0	0	0	0	0	0	0	0	0
Systemic_sclerosis	rs7574865-T	rs4853458	chr2	191959489	0.105	none	STAT4	none	NA	none	0	0	0	0	0	0	0	0	0	0	0	0	0	0	0	0	0	0	0	0	0	0	0	0	0	0	0	0	0	0	0	0	0
Systemic_sclerosis	rs7574865-T	rs8179673	chr2	191969341	0.105	none	STAT4	none	NA	CD25-_IL17-_Th_stim_MACS	0	0	0	0	0	0	0	1	1	0	1	1	0	0	0	1	0	0	0	0	0	0	0	0	0	0	0	0	0	0	0	1	1
Systemic_sclerosis	rs7574865-T	rs10181656	chr2	191969879	0.105	none	STAT4	none	NA	CD25-_IL17-_Th_stim_MACS	0	0	0	0	0	0	0	1	1	0	1	1	0	0	0	1	0	0	0	0	0	0	0	0	0	0	0	0	0	0	0	1	1
Systemic_sclerosis	rs7574865-T	rs7582694	chr2	191970120	0.105	none	STAT4	none	NA	CD25-_IL17-_Th_stim_MACS	0	0	0	0	0	0	0	1	1	0	1	1	0	0	0	1	0	0	0	0	0	0	0	0	0	0	0	0	0	0	0	1	1
Systemic_sclerosis	rs7574865-T	rs11889341	chr2	191943742	0.0451	none	STAT4	none	NA	CD25-_IL17-_Th_stim_MACS	0	0	0	0	0	0	0	1	1	1	1	1	0	0	1	1	1	0	0	0	0	0	0	0	0	0	0	0	0	0	0	0	0
Systemic_sclerosis	rs7574865-T	rs4853459	chr2	191962096	0.0296	none	STAT4	none	NA	none	0	0	0	0	0	0	0	0	0	0	0	0	0	0	0	0	0	0	0	0	0	0	0	0	0	0	0	0	0	0	0	0	0
Systemic_sclerosis	rs2233287-A	rs2233287	chr5	150440097	0.2164	none	TNIP1	none	NA	AdiposeNuclei	1	1	1	1	1	1	1	1	1	1	1	1	1	1	1	1	0	1	1	1	1	1	1	1	1	1	1	1	1	1	1	1	1
Systemic_sclerosis	rs2233287-A	rs2233290	chr5	150436503	0.2164	missense	TNIP1	none	NA	adult_CD14	0	0	0	0	0	0	0	1	1	0	1	1	1	1	1	0	0	1	1	1	0	1	0	1	1	1	1	1	0	1	0	0	0
Systemic_sclerosis	rs2233287-A	rs2042234	chr5	150439131	0.2164	none	TNIP1	none	NA	adult_CD14	1	1	1	1	1	1	1	1	1	1	1	1	1	1	1	1	1	1	1	1	1	1	1	1	1	1	1	1	1	1	1	0	0
Systemic_sclerosis	rs2233287-A	rs2001542	chr5	150432859	0.0461	none	TNIP1	none	NA	adult_CD14	0	0	1	0	1	0	0	1	1	1	1	1	1	1	1	1	1	1	1	1	0	1	1	1	0	1	1	1	1	1	1	1	0
Systemic_sclerosis	rs2233287-A	rs6579837	chr5	150434894	0.0461	none	TNIP1	none	NA	colonic_mucosa	1	0	1	0	0	0	1	1	1	1	1	1	1	1	1	0	1	1	1	1	0	1	1	1	1	1	1	1	1	1	0	0	0
Systemic_sclerosis	rs2233287-A	rs17111708	chr5	150443507	0.0446	none	TNIP1	none	NA	AdiposeNuclei	1	1	1	1	1	1	1	1	1	1	1	1	1	1	1	1	1	1	1	1	0	1	1	1	1	1	1	1	1	1	1	1	1
Systemic_sclerosis	rs2233287-A	rs73272818	chr5	150444843	0.0311	none	TNIP1	none	NA	Th2	0	0	0	0	0	0	1	1	1	1	1	1	1	1	1	1	0	1	1	1	1	1	0	1	1	1	0	1	0	1	1	0	0
Systemic_sclerosis	rs2233287-A	rs59926079	chr5	150447743	0.0311	none	TNIP1	none	NA	HSMM-myotube	1	1	1	1	1	1	1	1	1	1	1	1	1	1	1	1	1	1	1	1	1	1	0	1	1	1	1	1	1	1	1	1	1
Systemic_sclerosis	rs2233287-A	rs58474444	chr5	150447880	0.0311	none	TNIP1	none	NA	kidney	1	1	1	1	1	1	1	1	1	1	1	1	1	1	1	1	1	1	1	1	1	1	0	1	1	1	0	1	1	1	1	1	1
Systemic_sclerosis	rs2233287-A	rs73272828	chr5	150449220	0.0311	none	TNIP1	none	NA	kidney	1	1	1	1	1	1	1	1	1	1	1	1	1	1	1	1	1	1	1	1	1	1	1	1	1	1	1	1	1	1	1	1	1
Systemic_sclerosis	rs10488631	rs10488631	chr7	128594183	0.2025	none	none	none	NA	adult_CD20	0	0	0	0	0	0	0	1	1	1	1	1	1	1	0	1	1	1	1	1	1	1	1	1	1	0	1	1	1	0	0	0	0
Systemic_sclerosis	rs10488631	rs2070197	chr7	128589000	0.2025	utr3	IRF5	none	NA	adult_CD14	1	1	0	1	1	1	1	1	0	1	0	1	0	0	1	0	0	1	1	1	1	1	1	1	1	1	0	0	1	0	0	0	0
Systemic_sclerosis	rs10488631	rs12539741	chr7	128596805	0.2025	none	TNPO3	none	NA	adult_CD20	0	1	0	0	0	0	0	1	1	1	1	1	1	0	1	1	1	1	1	1	0	1	1	1	1	0	1	0	1	1	0	1	0
Systemic_sclerosis	rs10488631	rs12536266	chr7	128611035	0.2025	none	TNPO3	none	NA	none	0	0	0	0	0	0	0	0	0	0	0	0	0	0	0	0	0	0	0	0	0	0	0	0	0	0	0	0	0	0	0	0	0
Systemic_sclerosis	rs10488631	rs35000415	chr7	128585616	0.0949	none	IRF5	none	NA	adult_CD14	0	0	0	0	1	0	1	0	1	0	0	1	1	1	0	0	0	1	1	1	1	1	1	0	1	0	0	1	0	0	0	0	0
Systemic_sclerosis	rs10488631	rs34270648	chr7	128588434	0.0284	none	IRF5	none	NA	adult_CD14	0	0	0	1	1	1	1	0	0	1	0	1	1	0	0	0	0	1	1	1	1	1	0	0	1	0	0	0	0	0	0	0	0
Systemic_sclerosis	rs11047102	rs11047102	chr12	23946146	0.5275	none	SOX5	none	NA	none	0	0	0	0	0	0	0	0	0	0	0	0	0	0	0	0	0	0	0	0	0	0	0	0	0	0	0	0	0	0	0	0	0
Systemic_sclerosis	rs11047102	rs11047112	chr12	23967668	0.2034	none	SOX5	none	NA	none	0	0	0	0	0	0	0	0	0	0	0	0	0	0	0	0	0	0	0	0	0	0	0	0	0	0	0	0	0	0	0	0	0
Systemic_sclerosis	rs11047102	rs11047118	chr12	23977897	0.1743	none	SOX5	none	NA	none	0	0	0	0	0	0	0	0	0	0	0	0	0	0	0	0	0	0	0	0	0	0	0	0	0	0	0	0	0	0	0	0	0
Systemic_sclerosis	rs11047102	rs145813491	chr12	23974828	0.0948	none	SOX5	none	NA	none	0	0	0	0	0	0	0	0	0	0	0	0	0	0	0	0	0	0	0	0	0	0	0	0	0	0	0	0	0	0	0	0	0
Systemic_sclerosis	rs11171747	rs11171747	chr12	56518408	0.8345	none	none	MYL6B	-	Pancreatic_Islets	1	1	1	1	1	1	0	1	1	1	1	1	1	1	1	1	1	1	1	1	1	1	1	1	1	1	1	1	1	1	1	1	1
Systemic_sclerosis	rs11171747	rs34358051	chr12	56533362	0.138	none	ESYT1	none	NA	Th2	1	0	1	0	1	0	0	1	1	1	1	1	1	1	1	1	1	1	1	0	1	1	0	1	0	1	0	1	1	0	0	0	0
Systemic_sclerosis	rs11642873	rs11642873	chr16	85991705	0.3356	none	none	none	NA	none	0	0	0	0	0	0	0	0	0	0	0	0	0	0	0	0	0	0	0	0	0	0	0	0	0	0	0	0	0	0	0	0	0
Systemic_sclerosis	rs11642873	rs12445476	chr16	85991269	0.3356	none	none	none	NA	none	0	0	0	0	0	0	0	0	0	0	0	0	0	0	0	0	0	0	0	0	0	0	0	0	0	0	0	0	0	0	0	0	0
Systemic_sclerosis	rs11642873	rs11117426	chr16	85990267	0.1942	none	none	none	NA	GM12878	0	0	0	0	0	0	0	0	0	0	0	0	1	1	1	0	0	0	1	1	1	0	1	1	0	0	0	0	0	0	0	0	0
Systemic_sclerosis	rs11642873	rs11117427	chr16	85990557	0.129	none	none	none	NA	GM12878	0	0	0	0	0	0	0	0	0	0	0	0	1	1	1	0	0	0	1	1	1	0	1	1	0	0	0	0	0	0	0	0	0
Vitiligo	rs4908760-G	rs4908760	chr1	8526142	0.1028	none	RERE	none	NA	angular_gyrus	1	1	1	1	1	1	1	1	1	1	1	0	1	1	1	1	0	1	1	1	1	1	1	1	1	1	1	1	1	1	1	0	0
Vitiligo	rs4908760-G	rs910581	chr1	8529524	0.1028	none	RERE	none	NA	none	0	0	0	0	0	0	0	0	0	0	0	0	0	0	0	0	0	0	0	0	0	0	0	0	0	0	0	0	0	0	0	0	0
Vitiligo	rs4908760-G	rs7543004	chr1	8531111	0.1028	none	RERE	none	NA	none	0	0	0	0	0	0	0	0	0	0	0	0	0	0	0	0	0	0	0	0	0	0	0	0	0	0	0	0	0	0	0	0	0
Vitiligo	rs4908760-G	rs1922983	chr1	8531326	0.1028	none	RERE	none	NA	Th2	1	0	1	0	1	1	1	1	0	1	1	1	1	1	1	1	0	0	1	0	0	0	1	0	0	1	1	1	1	1	1	0	0
Vitiligo	rs4908760-G	rs12080583	chr1	8524877	0.0629	none	RERE	none	NA	kidney	1	1	1	1	1	1	1	1	1	1	1	1	1	0	1	0	1	1	1	1	0	1	1	1	1	1	1	1	1	1	1	1	1
Vitiligo	rs4908760-G	rs12061328	chr1	8531963	0.0629	none	RERE	none	NA	Th2	1	0	1	0	1	1	1	1	0	1	1	1	1	1	1	1	0	0	1	0	0	0	1	0	0	1	1	1	1	1	1	0	0
Vitiligo	rs4908760-G	rs4351668	chr1	8535818	0.0629	none	RERE	none	NA	none	0	0	0	0	0	0	0	0	0	0	0	0	0	0	0	0	0	0	0	0	0	0	0	0	0	0	0	0	0	0	0	0	0
Vitiligo	rs4908760-G	rs6577488	chr1	8534529	0.0511	none	RERE	none	NA	B_Cell_Centroblast	0	0	0	0	1	0	0	1	0	0	1	0	0	1	1	0	0	0	1	1	1	0	1	0	0	0	1	1	0	1	1	0	0
Vitiligo	rs4908760-G	rs1024197	chr1	8537058	0.0434	none	RERE	none	NA	Th2	1	1	1	1	1	1	1	1	0	0	1	1	1	1	1	1	0	1	1	1	0	1	1	1	1	1	1	0	1	1	1	1	1
Vitiligo	rs4908760-G	rs7551849	chr1	8539463	0.0378	none	RERE	none	NA	none	0	0	0	0	0	0	0	0	0	0	0	0	0	0	0	0	0	0	0	0	0	0	0	0	0	0	0	0	0	0	0	0	0
Vitiligo	rs2476601-A	rs2476601	chr1	114377568	0.7871	missense	PTPN22	none	NA	none	0	0	0	0	0	0	0	0	0	0	0	0	0	0	0	0	0	0	0	0	0	0	0	0	0	0	0	0	0	0	0	0	0
Vitiligo	rs2476601-A	rs6679677	chr1	114303808	0.2129	none	none	none	NA	Mobilized_CD34	1	0	1	1	0	0	0	1	1	1	1	1	0	1	0	1	1	1	1	0	0	1	1	0	0	1	1	0	1	0	0	1	1
Vitiligo	rs2111485-G	rs2111485	chr2	163110536	0.9345	none	none	none	NA	adult_CD14	1	1	1	0	0	0	0	0	0	0	0	0	1	1	0	0	1	1	0	0	0	0	0	0	0	0	0	0	1	0	1	0	0
Vitiligo	rs2111485-G	rs1990760	chr2	163124051	0.0653	missense	IFIH1	none	NA	none	0	0	0	0	0	0	0	0	0	0	0	0	0	0	0	0	0	0	0	0	0	0	0	0	0	0	0	0	0	0	0	0	0
Vitiligo	rs1464510-T	rs1464510	chr3	188112554	0.1973	none	LPP	none	NA	B_Cell_Centroblast	0	0	0	0	0	0	0	0	0	0	1	0	0	0	0	0	0	1	1	0	1	0	0	0	1	1	1	1	0	1	0	1	1
Vitiligo	rs1464510-T	rs12634152	chr3	188121019	0.0757	none	LPP	none	NA	none	0	0	0	0	0	0	0	0	0	0	0	0	0	0	0	0	0	0	0	0	0	0	0	0	0	0	0	0	0	0	0	0	0
Vitiligo	rs1464510-T	rs2889896	chr3	188102716	0.0533	none	LPP	none	NA	B_Cell_Centroblast	0	0	0	0	0	0	0	0	0	1	1	0	1	1	0	1	1	1	1	0	1	0	0	1	1	1	1	1	1	1	0	0	1
Vitiligo	rs1464510-T	rs12485704	chr3	188109766	0.0533	none	LPP	none	NA	adult_CD20	0	1	1	1	1	1	1	0	0	0	1	1	1	1	1	1	0	1	1	1	1	0	0	1	1	1	1	1	0	1	1	1	1
Vitiligo	rs1464510-T	rs13093110	chr3	188125120	0.0529	none	LPP	none	NA	none	0	0	0	0	0	0	0	0	0	0	0	0	0	0	0	0	0	0	0	0	0	0	0	0	0	0	0	0	0	0	0	0	0
Vitiligo	rs1464510-T	rs13079741	chr3	188101861	0.0493	none	LPP	none	NA	none	0	0	0	0	0	0	0	0	0	0	0	0	0	0	0	0	0	0	0	0	0	0	0	0	0	0	0	0	0	0	0	0	0
Vitiligo	rs1464510-T	rs715199	chr3	188126536	0.0453	none	LPP	none	NA	none	0	0	0	0	0	0	0	0	0	0	0	0	0	0	0	0	0	0	0	0	0	0	0	0	0	0	0	0	0	0	0	0	0
Vitiligo	rs1464510-T	rs9866135	chr3	188095287	0.0391	none	LPP	none	NA	none	0	0	0	0	0	0	0	0	0	0	0	0	0	0	0	0	0	0	0	0	0	0	0	0	0	0	0	0	0	0	0	0	0
Vitiligo	rs1464510-T	rs13098877	chr3	188133163	0.034	none	LPP	none	NA	B_Cell_Centroblast	0	0	0	0	0	0	0	0	0	0	0	0	1	0	0	0	0	0	0	0	1	0	0	0	0	0	0	0	0	0	0	1	1
Vitiligo	rs1464510-T	rs13076312	chr3	188089254	0.0298	none	LPP	none	NA	none	0	0	0	0	0	0	0	0	0	0	0	0	0	0	0	0	0	0	0	0	0	0	0	0	0	0	0	0	0	0	0	0	0
Vitiligo	rs16872571-C	rs16872571	chr4	10726853	0.1515	none	none	none	NA	CD25+_CD127-_Treg	0	0	0	0	0	0	0	1	0	1	1	0	1	1	1	1	0	0	1	1	1	0	0	1	0	0	0	0	0	1	0	0	0
Vitiligo	rs16872571-C	rs4697651	chr4	10721433	0.0674	none	none	none	NA	CD25+_CD127-_Treg	0	0	0	0	0	0	0	0	0	1	1	0	1	1	1	1	0	0	1	1	0	0	0	0	0	0	0	0	0	0	0	0	0
Vitiligo	rs16872571-C	rs58410952	chr4	10723466	0.0674	none	none	none	NA	CD25+_CD127-_Treg	0	0	0	0	0	0	0	0	1	1	0	0	1	1	1	0	0	0	1	1	0	0	0	0	1	0	0	0	0	1	0	0	0
Vitiligo	rs16872571-C	rs61794283	chr4	10707451	0.061	none	none	none	NA	Mobilized_CD34	0	0	0	0	0	0	0	0	1	1	1	0	0	1	1	0	1	0	0	1	1	1	0	0	0	0	0	0	0	1	0	0	1
Vitiligo	rs16872571-C	rs72491255	chr4	10709007	0.061	none	none	none	NA	none	0	0	0	0	0	0	0	0	0	0	0	0	0	0	0	0	0	0	0	0	0	0	0	0	0	0	0	0	0	0	0	0	0
Vitiligo	rs16872571-C	rs16872451	chr4	10709589	0.061	none	none	none	NA	none	0	0	0	0	0	0	0	0	0	0	0	0	0	0	0	0	0	0	0	0	0	0	0	0	0	0	0	0	0	0	0	0	0
Vitiligo	rs16872571-C	rs73812918	chr4	10707104	0.0508	none	none	none	NA	Mobilized_CD34	0	0	0	0	0	0	0	0	1	1	1	0	0	1	1	0	1	0	0	1	1	1	0	0	0	0	0	0	0	1	0	0	1
Vitiligo	rs16872571-C	rs4697785	chr4	10725329	0.0379	none	none	none	NA	CD25+_CD127-_Treg	0	0	0	0	0	0	0	1	1	1	1	0	1	1	1	1	0	0	1	1	1	1	0	0	0	0	0	0	0	0	0	0	0
Vitiligo	rs16872571-C	rs61794304	chr4	10710103	0.0325	none	none	none	NA	none	0	0	0	0	0	0	0	0	0	0	0	0	0	0	0	0	0	0	0	0	0	0	0	0	0	0	0	0	0	0	0	0	0
Vitiligo	rs16872571-C	rs11723349	chr4	10704912	0.0303	none	none	none	NA	Mobilized_CD34	0	0	0	0	0	0	0	0	0	1	0	0	1	1	1	0	0	0	1	1	0	1	0	0	1	0	0	0	0	1	0	1	1
Vitiligo	rs16872571-C	rs16872477	chr4	10712851	0.0293	none	none	none	NA	none	0	0	0	0	0	0	0	0	0	0	0	0	0	0	0	0	0	0	0	0	0	0	0	0	0	0	0	0	0	0	0	0	0
Vitiligo	rs16872571-C	rs16872478	chr4	10713051	0.0293	none	none	none	NA	none	0	0	0	0	0	0	0	0	0	0	0	0	0	0	0	0	0	0	0	0	0	0	0	0	0	0	0	0	0	0	0	0	0
Vitiligo	rs16872571-C	rs61794305	chr4	10714521	0.0293	none	none	none	NA	none	0	0	0	0	0	0	0	0	0	0	0	0	0	0	0	0	0	0	0	0	0	0	0	0	0	0	0	0	0	0	0	0	0
Vitiligo	rs16872571-C	rs11736875	chr4	10715056	0.0293	none	none	none	NA	none	0	0	0	0	0	0	0	0	0	0	0	0	0	0	0	0	0	0	0	0	0	0	0	0	0	0	0	0	0	0	0	0	0
Vitiligo	rs16872571-C	rs11731191	chr4	10716979	0.0293	none	none	none	NA	CD25+_CD127-_Treg	0	0	0	0	0	0	0	0	0	1	0	0	0	0	1	1	0	0	0	0	0	0	0	0	0	1	0	0	0	0	0	0	0
Vitiligo	rs16872571-C	rs55688771	chr4	10719012	0.0293	none	none	none	NA	CD25+_CD127-_Treg	0	0	0	0	0	0	0	0	1	1	0	0	1	0	1	0	0	0	1	0	1	1	0	0	1	0	0	0	0	1	0	0	0
Vitiligo	rs16872571-C	rs7681931	chr4	10720375	0.0293	none	none	none	NA	CD25+_CD127-_Treg	0	0	0	0	0	0	0	0	0	1	0	0	0	0	0	0	0	0	0	0	0	0	0	0	0	0	0	0	0	0	0	0	0
Vitiligo	rs3757247-A	rs3757247	chr6	90957463	0.4479	none	BACH2	none	NA	CD25-_IL17-_Th_stim_MACS	0	0	0	0	0	0	0	1	1	0	1	1	0	1	1	1	1	0	1	0	0	0	0	0	0	0	0	1	0	0	0	0	0
Vitiligo	rs3757247-A	rs11755527	chr6	90958231	0.1296	none	BACH2	none	NA	CD25-_IL17-_Th_stim_MACS	0	0	0	0	0	0	0	1	1	1	1	1	1	1	1	1	0	0	1	0	1	0	1	0	0	0	0	0	0	0	1	1	0
Vitiligo	rs3757247-A	rs56297233	chr6	91014029	0.0734	none	none	none	NA	B_Cell_Centroblast	0	0	0	0	0	0	0	1	1	0	1	0	1	1	0	1	1	0	1	0	1	0	0	0	0	0	0	0	0	0	0	0	0
Vitiligo	rs2236313-T	rs2236313	chr6	167360389	0.9858	none	RNASET2	none	NA	none	0	0	0	0	0	0	0	0	0	0	0	0	0	0	0	0	0	0	0	0	0	0	0	0	0	0	0	0	0	0	0	0	0
Vitiligo	rs853308-G	rs853308	chr8	133929917	0.0536	none	TG	none	NA	Th1	0	0	0	0	0	0	0	0	1	1	1	1	1	1	0	0	0	0	0	0	1	0	0	0	1	0	1	0	0	0	0	1	0
Vitiligo	rs853308-G	rs860475	chr8	133929799	0.0328	none	TG	none	NA	Th1	0	0	0	0	0	0	0	0	1	1	1	1	1	1	0	0	0	0	0	0	1	0	0	0	1	0	1	0	0	0	0	1	0
Vitiligo	rs853308-G	rs853307	chr8	133930674	0.0328	none	TG	none	NA	Th1	0	0	0	0	0	0	0	0	1	1	1	1	1	1	1	1	1	0	0	0	1	0	1	0	0	1	0	0	0	0	0	1	1
Vitiligo	rs853308-G	rs853306	chr8	133931011	0.0328	none	TG	none	NA	Th1	0	0	0	0	0	0	0	0	1	1	1	1	1	1	1	1	1	0	0	0	1	0	1	0	0	1	0	0	0	0	0	1	1
Vitiligo	rs853308-G	rs2687813	chr8	133931051	0.0328	none	TG	none	NA	Th1	0	0	0	0	0	0	0	0	1	1	1	1	1	1	1	1	1	0	0	0	1	0	1	0	0	1	0	0	0	0	0	1	1
Vitiligo	rs853308-G	rs2687812	chr8	133931055	0.0328	none	TG	none	NA	Th1	0	0	0	0	0	0	0	0	1	1	1	1	1	1	1	1	1	0	0	0	1	0	1	0	0	1	0	0	0	0	0	1	1
Vitiligo	rs706779-A	rs706779	chr10	6098824	0.9662	none	IL2RA	none	NA	Th1	1	1	1	1	0	1	1	1	1	1	1	1	1	1	1	0	1	0	1	1	1	0	1	1	1	1	0	1	1	1	0	0	0
Vitiligo	rs1417210	rs1417210	chr10	73135919	0.655	none	none	none	NA	colonic_mucosa	1	1	1	1	1	1	1	1	1	1	1	1	1	1	1	1	1	1	1	1	1	1	1	1	1	1	1	1	1	1	1	1	1
Vitiligo	rs1417210	rs7096915	chr10	73136474	0.1517	none	none	none	NA	colonic_mucosa	1	1	1	1	1	1	1	1	1	1	1	1	1	1	1	1	1	1	1	1	1	1	1	1	1	1	1	1	1	1	1	1	1
Vitiligo	rs1417210	rs7091537	chr10	73144235	0.1001	none	none	none	NA	none	0	0	0	0	0	0	0	0	0	0	0	0	0	0	0	0	0	0	0	0	0	0	0	0	0	0	0	0	0	0	0	0	0
Vitiligo	rs1417210	rs3059644	chr10	73136153	0.0522	none	none	none	NA	colonic_mucosa	1	1	1	1	1	1	1	1	1	1	1	1	1	1	1	1	1	1	1	1	1	1	1	1	1	1	1	1	1	1	1	1	1
Vitiligo	rs3814231-G	rs3814231	chr10	115481018	0.1984	none	CASP7	CASP7	+	HepG2	0	0	0	0	0	0	0	0	0	0	0	1	0	0	0	0	1	1	0	0	1	1	0	1	0	0	1	0	0	0	0	0	0
Vitiligo	rs3814231-G	rs12777332	chr10	115458936	0.0534	none	CASP7	CASP7	+	none	0	0	0	0	0	0	0	0	0	0	0	0	0	0	0	0	0	0	0	0	0	0	0	0	0	0	0	0	0	0	0	0	0
Vitiligo	rs3814231-G	rs12766891	chr10	115460714	0.0534	none	CASP7	CASP7	+	none	0	0	0	0	0	0	0	0	0	0	0	0	0	0	0	0	0	0	0	0	0	0	0	0	0	0	0	0	0	0	0	0	0
Vitiligo	rs3814231-G	rs12414006	chr10	115461485	0.0534	none	CASP7	CASP7	+	none	0	0	0	0	0	0	0	0	0	0	0	0	0	0	0	0	0	0	0	0	0	0	0	0	0	0	0	0	0	0	0	0	0
Vitiligo	rs3814231-G	rs61866462	chr10	115464690	0.0534	none	CASP7	CASP7	+	none	0	0	0	0	0	0	0	0	0	0	0	0	0	0	0	0	0	0	0	0	0	0	0	0	0	0	0	0	0	0	0	0	0
Vitiligo	rs3814231-G	rs12771452	chr10	115488331	0.0495	none	CASP7	CASP7	+	none	0	0	0	0	0	0	0	0	0	0	0	0	0	0	0	0	0	0	0	0	0	0	0	0	0	0	0	0	0	0	0	0	0
Vitiligo	rs3814231-G	rs61866461	chr10	115454862	0.0463	none	CASP7	CASP7	+	none	0	0	0	0	0	0	0	0	0	0	0	0	0	0	0	0	0	0	0	0	0	0	0	0	0	0	0	0	0	0	0	0	0
Vitiligo	rs3814231-G	rs2227310	chr10	115489152	0.043	missense	CASP7	CASP7	+	none	0	0	0	0	0	0	0	0	0	0	0	0	0	0	0	0	0	0	0	0	0	0	0	0	0	0	0	0	0	0	0	0	0
Vitiligo	rs3814231-G	rs2227309	chr10	115489167	0.043	missense	CASP7	CASP7	+	none	0	0	0	0	0	0	0	0	0	0	0	0	0	0	0	0	0	0	0	0	0	0	0	0	0	0	0	0	0	0	0	0	0
Vitiligo	rs3814231-G	rs4353229	chr10	115489589	0.043	utr3	CASP7	CASP7	+	none	0	0	0	0	0	0	0	0	0	0	0	0	0	0	0	0	0	0	0	0	0	0	0	0	0	0	0	0	0	0	0	0	0
Vitiligo	rs3814231-G	rs4595501	chr10	115491565	0.043	none	none	CASP7	+	none	0	0	0	0	0	0	0	0	0	0	0	0	0	0	0	0	0	0	0	0	0	0	0	0	0	0	0	0	0	0	0	0	0
Vitiligo	rs3814231-G	rs12762296	chr10	115492092	0.043	none	none	CASP7	+	Pancreatic_Islets	0	0	0	0	0	0	0	0	0	1	0	0	0	0	1	0	0	0	0	1	0	1	0	0	0	1	0	0	1	1	0	0	1
Vitiligo	rs3814231-G	rs34576279	chr10	115492404	0.043	none	none	none	NA	Pancreatic_Islets	0	0	0	0	0	0	0	0	0	1	0	0	0	0	1	0	0	0	0	1	0	1	0	0	0	1	0	0	1	1	0	0	1
Vitiligo	rs3814231-G	rs12762208	chr10	115492303	0.0377	none	none	CASP7	+	Pancreatic_Islets	0	0	0	0	0	0	0	0	0	1	0	0	0	0	1	0	0	0	0	1	0	1	0	0	0	1	0	0	1	1	0	0	1
Vitiligo	rs3814231-G	rs12766889	chr10	115490798	0.0331	none	none	none	NA	none	0	0	0	0	0	0	0	0	0	0	0	0	0	0	0	0	0	0	0	0	0	0	0	0	0	0	0	0	0	0	0	0	0
Vitiligo	rs3814231-G	rs34394259	chr10	115441082	0.0313	none	CASP7	CASP7	+	AdiposeNuclei	1	1	1	1	0	1	1	1	1	1	1	1	1	1	1	1	1	1	1	1	1	1	0	1	1	1	1	1	1	1	1	1	1
Vitiligo	rs10768122-G	rs10768122	chr11	35280852	0.0435	utr3	SLC1A2	none	NA	none	0	0	0	0	0	0	0	0	0	0	0	0	0	0	0	0	0	0	0	0	0	0	0	0	0	0	0	0	0	0	0	0	0
Vitiligo	rs10768122-G	rs10768120	chr11	35270854	0.0435	none	none	none	NA	none	0	0	0	0	0	0	0	0	0	0	0	0	0	0	0	0	0	0	0	0	0	0	0	0	0	0	0	0	0	0	0	0	0
Vitiligo	rs10768122-G	rs11033045	chr11	35272698	0.0435	none	none	none	NA	none	0	0	0	0	0	0	0	0	0	0	0	0	0	0	0	0	0	0	0	0	0	0	0	0	0	0	0	0	0	0	0	0	0
Vitiligo	rs10768122-G	rs3088168	chr11	35273268	0.0435	utr3	SLC1A2	none	NA	none	0	0	0	0	0	0	0	0	0	0	0	0	0	0	0	0	0	0	0	0	0	0	0	0	0	0	0	0	0	0	0	0	0
Vitiligo	rs10768122-G	rs1043101	chr11	35274829	0.0435	utr3	SLC1A2	none	NA	none	0	0	0	0	0	0	0	0	0	0	0	0	0	0	0	0	0	0	0	0	0	0	0	0	0	0	0	0	0	0	0	0	0
Vitiligo	rs10768122-G	rs11033046	chr11	35274933	0.0435	utr3	SLC1A2	none	NA	none	0	0	0	0	0	0	0	0	0	0	0	0	0	0	0	0	0	0	0	0	0	0	0	0	0	0	0	0	0	0	0	0	0
Vitiligo	rs10768122-G	rs12361171	chr11	35278333	0.0435	utr3	SLC1A2	none	NA	CD45RA_CD8	1	1	1	1	1	1	1	1	1	1	1	1	1	1	1	1	1	1	1	1	0	0	0	0	1	0	0	1	0	0	1	0	0
Vitiligo	rs10768122-G	rs10768121	chr11	35279656	0.0435	utr3	SLC1A2	none	NA	none	0	0	0	0	0	0	0	0	0	0	0	0	0	0	0	0	0	0	0	0	0	0	0	0	0	0	0	0	0	0	0	0	0
Vitiligo	rs10768122-G	rs10742339	chr11	35281100	0.0435	utr3	SLC1A2	none	NA	none	0	0	0	0	0	0	0	0	0	0	0	0	0	0	0	0	0	0	0	0	0	0	0	0	0	0	0	0	0	0	0	0	0
Vitiligo	rs1393350-G	rs1393350	chr11	89011046	0.8894	none	TYR	none	NA	none	0	0	0	0	0	0	0	0	0	0	0	0	0	0	0	0	0	0	0	0	0	0	0	0	0	0	0	0	0	0	0	0	0
Vitiligo	rs1393350-G	rs1126809	chr11	89017961	0.0879	missense	TYR	none	NA	none	0	0	0	0	0	0	0	0	0	0	0	0	0	0	0	0	0	0	0	0	0	0	0	0	0	0	0	0	0	0	0	0	0
Vitiligo	rs4409785-C	rs4409785	chr11	95311422	0.8527	none	none	none	NA	chondrogenic_dif_cells	0	1	0	0	0	0	0	0	0	0	1	1	1	1	1	0	1	1	1	0	1	0	1	0	0	0	0	0	0	0	0	1	1
Vitiligo	rs4409785-C	rs11021232	chr11	95320808	0.0742	none	none	none	NA	none	0	0	0	0	0	0	0	0	0	0	0	0	0	0	0	0	0	0	0	0	0	0	0	0	0	0	0	0	0	0	0	0	0
Vitiligo	rs4409785-C	rs12575636	chr11	95311260	0.0719	none	none	none	NA	chondrogenic_dif_cells	0	1	0	0	0	0	0	0	0	0	1	1	1	1	1	0	1	1	1	0	1	0	1	0	0	0	0	0	0	0	0	1	1
Vitiligo	rs638893-C	rs638893	chr11	118698537	0.0766	none	none	none	NA	none	0	0	0	0	0	0	0	0	0	0	0	0	0	0	0	0	0	0	0	0	0	0	0	0	0	0	0	0	0	0	0	0	0
Vitiligo	rs638893-C	rs640373	chr11	118698160	0.0766	none	none	none	NA	none	0	0	0	0	0	0	0	0	0	0	0	0	0	0	0	0	0	0	0	0	0	0	0	0	0	0	0	0	0	0	0	0	0
Vitiligo	rs638893-C	rs2508564	chr11	118699744	0.0766	none	none	none	NA	none	0	0	0	0	0	0	0	0	0	0	0	0	0	0	0	0	0	0	0	0	0	0	0	0	0	0	0	0	0	0	0	0	0
Vitiligo	rs638893-C	rs4938549	chr11	118701597	0.0472	none	none	none	NA	none	0	0	0	0	0	0	0	0	0	0	0	0	0	0	0	0	0	0	0	0	0	0	0	0	0	0	0	0	0	0	0	0	0
Vitiligo	rs638893-C	rs530646	chr11	118701668	0.0472	none	none	none	NA	none	0	0	0	0	0	0	0	0	0	0	0	0	0	0	0	0	0	0	0	0	0	0	0	0	0	0	0	0	0	0	0	0	0
Vitiligo	rs638893-C	rs12808822	chr11	118702269	0.0472	none	none	none	NA	none	0	0	0	0	0	0	0	0	0	0	0	0	0	0	0	0	0	0	0	0	0	0	0	0	0	0	0	0	0	0	0	0	0
Vitiligo	rs638893-C	rs2508921	chr11	118703484	0.0472	none	none	none	NA	none	0	0	0	0	0	0	0	0	0	0	0	0	0	0	0	0	0	0	0	0	0	0	0	0	0	0	0	0	0	0	0	0	0
Vitiligo	rs638893-C	rs1170396	chr11	118703817	0.0472	none	none	none	NA	none	0	0	0	0	0	0	0	0	0	0	0	0	0	0	0	0	0	0	0	0	0	0	0	0	0	0	0	0	0	0	0	0	0
Vitiligo	rs638893-C	rs649338	chr11	118705654	0.0472	none	none	none	NA	Th1	0	0	0	1	1	1	1	1	1	1	1	0	1	1	0	1	1	1	1	1	0	0	1	0	0	1	0	1	0	0	0	1	1
Vitiligo	rs638893-C	rs515707	chr11	118685481	0.0385	none	none	none	NA	adult_CD20	0	0	0	0	0	0	0	0	0	1	0	0	1	0	0	1	0	0	1	0	0	1	0	0	1	0	0	0	0	0	0	0	0
Vitiligo	rs638893-C	rs577121	chr11	118690550	0.0385	none	none	none	NA	B_Cell_Centroblast	0	0	1	1	1	1	1	0	0	0	1	0	1	1	1	0	0	0	1	1	1	1	0	1	1	0	0	1	1	1	0	1	1
Vitiligo	rs638893-C	rs583905	chr11	118695908	0.0385	none	none	none	NA	B_Cell_Centroblast	0	0	0	0	0	0	0	0	0	1	1	0	0	0	1	1	1	0	1	1	1	1	0	0	0	0	0	0	0	0	0	0	0
Vitiligo	rs638893-C	rs480791	chr11	118704255	0.0383	none	none	none	NA	Th1	0	0	0	1	1	1	1	1	1	0	1	0	1	1	1	1	1	0	1	0	0	0	0	0	0	0	0	1	0	0	1	0	0
Vitiligo	rs638893-C	rs622690	chr11	118704265	0.0383	none	none	none	NA	Th1	0	0	0	1	1	1	1	1	1	0	1	0	1	1	1	1	1	0	1	0	0	0	0	0	0	0	0	1	0	0	1	0	0
Vitiligo	rs638893-C	rs587816	chr11	118689871	0.0329	none	none	none	NA	adult_CD20	0	0	0	0	0	0	0	1	0	1	1	0	1	1	1	0	0	0	1	1	1	0	0	1	0	0	0	0	0	0	0	0	0
Vitiligo	rs638893-C	rs34239686	chr11	118690737	0.0287	none	none	none	NA	B_Cell_Centroblast	0	0	1	1	1	1	1	0	0	0	1	0	1	1	1	0	0	0	1	1	1	1	0	1	1	0	0	1	1	1	0	1	1
Vitiligo	rs638893-C	rs534114	chr11	118702002	0.0285	none	none	none	NA	none	0	0	0	0	0	0	0	0	0	0	0	0	0	0	0	0	0	0	0	0	0	0	0	0	0	0	0	0	0	0	0	0	0
Vitiligo	rs638893-C	rs73005500	chr11	118697375	0.0283	none	none	none	NA	none	0	0	0	0	0	0	0	0	0	0	0	0	0	0	0	0	0	0	0	0	0	0	0	0	0	0	0	0	0	0	0	0	0
Vitiligo	rs2456973-C	rs2456973	chr12	56416928	0.1852	none	IKZF4	none	NA	K562	1	1	1	1	0	1	1	1	1	1	1	1	1	1	1	1	1	1	1	1	1	1	1	1	0	1	0	0	1	0	0	0	0
Vitiligo	rs2456973-C	rs1701704	chr12	56412487	0.091	none	IKZF4	none	NA	kidney	0	0	0	1	0	0	0	1	1	0	0	1	0	1	1	1	1	0	1	0	1	0	1	1	1	0	1	1	1	1	0	0	0
Vitiligo	rs2456973-C	rs61938962	chr12	56446766	0.091	none	none	none	NA	none	0	0	0	0	0	0	0	0	0	0	0	0	0	0	0	0	0	0	0	0	0	0	0	0	0	0	0	0	0	0	0	0	0
Vitiligo	rs2456973-C	rs61938963	chr12	56446804	0.091	none	none	none	NA	none	0	0	0	0	0	0	0	0	0	0	0	0	0	0	0	0	0	0	0	0	0	0	0	0	0	0	0	0	0	0	0	0	0
Vitiligo	rs2456973-C	rs34415530	chr12	56444632	0.0771	none	none	none	NA	none	0	0	0	0	0	0	0	0	0	0	0	0	0	0	0	0	0	0	0	0	0	0	0	0	0	0	0	0	0	0	0	0	0
Vitiligo	rs2456973-C	rs1702877	chr12	56427808	0.0524	none	IKZF4	none	NA	Th1	0	0	0	0	1	0	0	1	1	1	1	1	1	1	1	0	1	0	0	0	1	1	0	0	0	0	0	0	1	0	0	0	0
Vitiligo	rs2456973-C	rs705704	chr12	56435412	0.0524	none	none	none	NA	K562	1	1	1	1	1	1	1	1	1	1	1	1	1	1	1	1	1	1	1	1	1	1	1	1	1	1	1	1	1	1	1	1	1
Vitiligo	rs2456973-C	rs2640564	chr12	56455294	0.0381	none	none	none	NA	none	0	0	0	0	0	0	0	0	0	0	0	0	0	0	0	0	0	0	0	0	0	0	0	0	0	0	0	0	0	0	0	0	0
Vitiligo	rs2456973-C	rs7302200	chr12	56449435	0.0381	none	none	none	NA	NH-Osteoblast	0	0	0	0	0	0	0	1	0	0	0	1	0	1	1	1	0	0	0	0	1	1	0	0	0	0	0	0	0	0	1	1	1
Vitiligo	rs2456973-C	rs10876866	chr12	56445366	0.0346	none	none	none	NA	none	0	0	0	0	0	0	0	0	0	0	0	0	0	0	0	0	0	0	0	0	0	0	0	0	0	0	0	0	0	0	0	0	0
Vitiligo	rs2456973-C	rs772921	chr12	56403577	0.0345	none	none	none	NA	AdiposeNuclei	1	1	1	1	1	1	0	1	1	1	1	1	1	1	1	1	1	0	0	1	0	0	1	1	0	1	1	1	1	1	0	0	0
Vitiligo	rs2456973-C	rs141490969	chr12	56450107	0.0287	none	none	none	NA	NH-Osteoblast	0	0	0	0	0	0	0	1	0	0	0	1	0	1	1	1	0	0	0	0	1	1	0	0	0	0	0	0	0	0	1	1	1
Vitiligo	rs4766578-T	rs4766578	chr12	111904371	0.6829	none	ATXN2	none	NA	none	0	0	0	0	0	0	0	0	0	0	0	0	0	0	0	0	0	0	0	0	0	0	0	0	0	0	0	0	0	0	0	0	0
Vitiligo	rs4766578-T	rs10774625	chr12	111910219	0.2287	none	ATXN2	none	NA	none	0	0	0	0	0	0	0	0	0	0	0	0	0	0	0	0	0	0	0	0	0	0	0	0	0	0	0	0	0	0	0	0	0
Vitiligo	rs4766578-T	rs3184504	chr12	111884608	0.0487	missense	SH2B3	none	NA	Pancreatic_Islets	1	1	1	1	1	1	1	1	1	1	1	1	1	1	1	1	1	1	1	1	1	1	1	1	1	1	1	1	1	1	1	1	1
Vitiligo	rs8192917-G	rs8192917	chr14	25102160	0.137	missense	GZMB	GZMB	+	Th1	0	0	0	0	0	0	0	1	1	0	1	1	1	1	1	1	1	0	0	1	0	1	0	1	1	0	1	1	0	0	0	0	0
Vitiligo	rs8192917-G	rs6573910	chr14	25100882	0.137	none	GZMB	GZMB	+	Th2	0	0	0	0	0	0	0	0	1	0	1	1	1	1	1	1	1	0	0	1	0	0	0	1	0	1	1	1	1	1	0	0	0
Vitiligo	rs8192917-G	rs6573911	chr14	25100933	0.137	none	GZMB	GZMB	+	Th1	0	0	0	0	0	0	0	0	1	1	1	1	1	1	1	1	1	0	0	1	0	0	1	1	0	0	1	0	0	0	0	0	0
Vitiligo	rs8192917-G	rs11539752	chr14	25101589	0.137	missense	GZMB	GZMB	+	Th1	0	0	0	0	0	0	0	0	1	1	1	1	1	1	1	1	1	0	0	1	0	0	1	1	0	0	1	0	0	0	0	0	0
Vitiligo	rs8192917-G	rs2273844	chr14	25103414	0.137	utr5	GZMB	GZMB	+	Th0	0	0	0	0	0	0	0	1	1	0	1	1	1	1	1	1	1	0	0	0	0	0	0	1	1	0	1	0	0	0	0	0	0
Vitiligo	rs8192917-G	rs1126639	chr14	25101548	0.0923	synonymous	GZMB	GZMB	+	Th1	0	0	0	0	0	0	0	0	1	1	1	1	1	1	1	1	1	0	0	1	0	0	1	1	0	0	1	0	0	0	0	0	0
Vitiligo	rs8192917-G	rs2236337	chr14	25100247	0.0614	utr3	GZMB	GZMB	+	Th2	0	0	0	0	0	0	0	0	1	0	1	1	1	1	1	1	1	0	0	1	0	0	0	1	0	1	1	1	1	1	0	0	0
Vitiligo	rs8192917-G	rs2236338	chr14	25100282	0.0429	missense	GZMB	GZMB	+	Th2	0	0	0	0	0	0	0	0	1	0	1	1	1	1	1	1	1	0	0	1	0	0	0	1	0	1	1	1	1	1	0	0	0
Vitiligo	rs1129038-C	rs1129038	chr15	28356859	0.6161	utr3	HERC2	none	NA	none	0	0	0	0	0	0	0	0	0	0	0	0	0	0	0	0	0	0	0	0	0	0	0	0	0	0	0	0	0	0	0	0	0
Vitiligo	rs1129038-C	rs12913832	chr15	28365618	0.3616	none	HERC2	none	NA	none	0	0	0	0	0	0	0	0	0	0	0	0	0	0	0	0	0	0	0	0	0	0	0	0	0	0	0	0	0	0	0	0	0
Vitiligo	rs9926296-A	rs9926296	chr16	89818089	0.7794	none	FANCA	none	NA	none	0	0	0	0	0	0	0	0	0	0	0	0	0	0	0	0	0	0	0	0	0	0	0	0	0	0	0	0	0	0	0	0	0
Vitiligo	rs6510827-T	rs6510827	chr19	4830628	0.2801	none	TICAM1	none	NA	GM12878	1	1	1	1	1	1	1	1	1	1	1	1	1	1	1	1	1	1	1	1	1	1	1	1	1	1	1	1	1	1	1	1	1
Vitiligo	rs6510827-T	rs4807000	chr19	4831878	0.2801	none	none	none	NA	Liver1	1	1	1	1	1	1	1	1	1	1	1	1	1	1	1	1	1	1	1	1	1	1	1	1	1	1	1	1	1	1	1	1	1
Vitiligo	rs6510827-T	rs7254729	chr19	4832362	0.0741	none	none	none	NA	Pancreatic_Islets	0	0	0	0	1	0	0	1	1	1	1	1	1	1	1	1	1	1	1	1	1	1	1	1	1	1	1	1	1	1	1	1	1
Vitiligo	rs6510827-T	rs76627817	chr19	4830098	0.0689	none	TICAM1	none	NA	Liver1	1	1	1	1	1	1	1	1	1	1	1	1	1	1	0	1	1	1	1	1	1	1	0	1	1	1	1	1	1	1	0	0	1
Vitiligo	rs6510827-T	rs11667267	chr19	4823689	0.0419	none	TICAM1	none	NA	none	0	0	0	0	0	0	0	0	0	0	0	0	0	0	0	0	0	0	0	0	0	0	0	0	0	0	0	0	0	0	0	0	0
Vitiligo	rs6510827-T	rs10425559	chr19	4837487	0.0387	none	none	none	NA	GM12878	0	0	1	1	1	0	1	1	1	1	1	1	1	1	1	0	0	1	1	1	1	1	1	1	0	1	1	1	1	0	0	1	1
Vitiligo	rs6510827-T	rs10424978	chr19	4837557	0.0354	none	none	none	NA	GM12878	0	0	1	1	1	0	1	1	1	1	1	1	1	1	1	0	0	1	1	1	1	1	1	1	0	1	1	1	1	0	0	1	1
Vitiligo	rs11203203-A	rs11203203	chr21	43836186	0.6171	none	UBASH3A	none	NA	GM12878	0	0	0	0	0	0	0	1	1	1	1	1	1	1	1	1	1	0	0	1	0	1	0	1	1	0	0	0	0	0	0	0	0
Vitiligo	rs11203203-A	rs80054410	chr21	43836010	0.2506	none	UBASH3A	none	NA	GM12878	0	0	0	0	0	0	0	1	1	1	1	1	1	1	1	1	1	0	0	1	0	1	0	1	1	0	0	0	0	0	0	0	0
Vitiligo	rs229527-T	rs229527	chr22	37581485	0.5022	missense	C1QTNF6	none	NA	CD25+_CD127-_Treg	0	0	0	0	0	0	1	1	1	1	1	0	1	1	1	0	1	0	0	0	0	1	0	0	0	1	0	1	0	1	0	0	0
Vitiligo	rs229527-T	rs229528	chr22	37581677	0.0564	none	C1QTNF6	none	NA	CD25+_CD127-_Treg	0	0	0	0	0	0	1	1	1	1	1	0	1	1	1	0	1	0	0	0	0	1	0	0	0	1	0	1	0	1	0	0	0
Vitiligo	rs229527-T	rs5845323	chr22	37583732	0.0518	none	C1QTNF6	none	NA	kidney	1	1	1	1	1	1	1	1	1	1	1	1	1	1	1	1	1	0	1	1	0	1	0	1	1	1	0	1	1	1	1	1	1
Vitiligo	rs229527-T	rs229531	chr22	37585736	0.0518	none	C1QTNF6	none	NA	kidney	1	1	1	1	1	1	1	0	1	1	1	0	1	1	1	1	1	0	1	1	0	1	1	1	1	1	0	1	1	1	0	1	1
Vitiligo	rs229527-T	rs2858483	chr22	37586672	0.0518	none	C1QTNF6	none	NA	kidney	0	0	0	1	0	0	0	1	0	0	1	0	0	0	1	1	1	0	1	0	0	0	1	1	1	1	0	1	0	1	0	1	0
Vitiligo	rs229527-T	rs2858484	chr22	37586676	0.0518	none	C1QTNF6	none	NA	kidney	0	0	0	1	0	0	0	1	0	0	1	0	0	0	1	1	1	0	1	0	0	0	1	1	1	1	0	1	0	1	0	1	0
Vitiligo	rs229527-T	rs229533	chr22	37587111	0.0518	none	C1QTNF6	none	NA	none	0	0	0	0	0	0	0	0	0	0	0	0	0	0	0	0	0	0	0	0	0	0	0	0	0	0	0	0	0	0	0	0	0
Vitiligo	rs229527-T	rs229536	chr22	37589869	0.0518	none	C1QTNF6	none	NA	Th1	1	1	1	1	1	1	1	1	1	1	1	1	1	1	1	1	1	0	1	1	0	1	1	1	1	1	1	1	1	1	0	1	0
Vitiligo	rs229527-T	rs229540	chr22	37591290	0.0435	none	C1QTNF6	none	NA	CD25+_CD127-_Treg	1	1	0	1	1	1	1	1	1	1	1	1	1	1	1	1	1	1	1	1	0	1	0	1	1	1	1	1	1	1	1	0	0
Vitiligo	rs229527-T	rs229541	chr22	37591318	0.0435	none	C1QTNF6	none	NA	CD25+_CD127-_Treg	1	1	0	1	1	1	1	1	1	1	1	1	1	1	1	1	1	1	1	1	0	1	0	1	1	1	1	1	1	1	1	0	0
Vitiligo	rs229527-T	rs229542	chr22	37592106	0.0435	none	C1QTNF6	none	NA	AdiposeNuclei	1	1	1	1	1	1	1	1	1	1	1	1	1	1	1	1	1	0	0	1	1	0	1	1	1	1	1	1	1	1	1	0	0
Vitiligo	rs4822024-G	rs4822024	chr22	41757647	0.0535	none	none	none	NA	none	0	0	0	0	0	0	0	0	0	0	0	0	0	0	0	0	0	0	0	0	0	0	0	0	0	0	0	0	0	0	0	0	0
Vitiligo	rs4822024-G	rs6002351	chr22	41757223	0.0283	none	none	none	NA	none	0	0	0	0	0	0	0	0	0	0	0	0	0	0	0	0	0	0	0	0	0	0	0	0	0	0	0	0	0	0	0	0	0
Vitiligo	rs4822024-G	rs12484074	chr22	41752747	0.0282	synonymous	ZC3H7B	none	NA	none	0	0	0	0	0	0	0	0	0	0	0	0	0	0	0	0	0	0	0	0	0	0	0	0	0	0	0	0	0	0	0	0	0
Vitiligo	rs4822024-G	rs9538	chr22	41755857	0.0282	utr3	ZC3H7B	none	NA	none	0	0	0	0	0	0	0	0	0	0	0	0	0	0	0	0	0	0	0	0	0	0	0	0	0	0	0	0	0	0	0	0	0
Vitiligo	rs4822024-G	rs9607798	chr22	41759987	0.0282	none	none	none	NA	Pancreatic_Islets	1	1	0	0	1	1	1	0	0	1	0	1	1	0	1	0	0	0	0	1	1	1	0	0	1	0	0	1	1	0	0	0	0
Type_1_diabetes	rs2269241-G	rs2269241	chr1	64108771	0.0715	none	PGM1	none	NA	HepG2	0	0	1	0	0	0	1	0	0	1	1	1	1	0	1	0	1	1	1	1	0	0	0	1	1	1	1	1	1	1	1	1	0
Type_1_diabetes	rs2269241-G	rs2269242	chr1	64108682	0.0715	none	PGM1	none	NA	HepG2	0	0	1	0	0	0	1	0	0	1	1	1	1	0	1	0	1	1	1	1	0	0	0	1	1	1	1	1	1	1	1	1	0
Type_1_diabetes	rs2269241-G	rs2269240	chr1	64109264	0.0715	none	PGM1	none	NA	HepG2	0	0	1	0	0	0	1	0	0	1	1	1	1	0	1	0	1	1	1	1	0	0	0	1	1	1	1	1	1	1	1	1	0
Type_1_diabetes	rs2269241-G	rs2269239	chr1	64109359	0.0715	none	PGM1	none	NA	HepG2	0	0	1	0	0	0	1	0	0	1	1	1	1	0	1	0	1	1	1	1	0	0	0	1	1	1	1	1	1	1	1	1	0
Type_1_diabetes	rs2269241-G	rs2301055	chr1	64106817	0.0493	none	PGM1	none	NA	HepG2	0	0	0	0	0	0	0	0	1	1	0	0	0	0	1	0	0	1	1	0	0	1	0	1	1	1	1	1	1	1	0	0	0
Type_1_diabetes	rs2269241-G	rs2269246	chr1	64107491	0.0493	none	PGM1	none	NA	HepG2	0	0	0	0	0	0	0	0	1	1	0	0	0	0	1	0	0	1	1	0	0	1	0	1	1	1	1	1	1	1	0	0	0
Type_1_diabetes	rs2269241-G	rs2269245	chr1	64107893	0.0493	none	PGM1	none	NA	HepG2	0	0	0	0	0	0	0	0	1	0	1	1	0	0	1	0	0	1	0	1	0	0	0	1	1	0	1	1	1	1	0	0	0
Type_1_diabetes	rs2269241-G	rs2301054	chr1	64107028	0.0422	none	PGM1	none	NA	HepG2	0	0	0	0	0	0	0	0	1	1	0	0	0	0	1	0	0	1	1	0	0	1	0	1	1	1	1	1	1	1	0	0	0
Type_1_diabetes	rs2269241-G	rs3790858	chr1	64111548	0.0305	none	PGM1	none	NA	AdiposeNuclei	0	0	0	1	1	0	1	1	0	0	1	0	0	0	1	1	1	1	0	0	1	0	0	1	1	1	1	1	1	1	0	1	1
Type_1_diabetes	rs2269241-G	rs3790857	chr1	64111866	0.0305	none	PGM1	none	NA	AdiposeNuclei	0	0	0	0	0	0	0	0	1	0	1	0	0	1	1	1	0	1	1	1	0	1	0	0	0	1	1	1	1	1	0	1	1
Type_1_diabetes	rs2269241-G	rs12122838	chr1	64112169	0.028	none	PGM1	none	NA	AdiposeNuclei	0	0	0	0	0	0	0	0	1	0	1	0	0	1	1	1	0	1	1	1	0	1	0	0	0	1	1	1	1	1	0	1	1
Type_1_diabetes	rs2269241-G	rs61765292	chr1	64113459	0.028	none	PGM1	none	NA	none	0	0	0	0	0	0	0	0	0	0	0	0	0	0	0	0	0	0	0	0	0	0	0	0	0	0	0	0	0	0	0	0	0
Type_1_diabetes	rs2269241-G	rs1911109	chr1	64114660	0.028	none	PGM1	none	NA	none	0	0	0	0	0	0	0	0	0	0	0	0	0	0	0	0	0	0	0	0	0	0	0	0	0	0	0	0	0	0	0	0	0
Type_1_diabetes	rs2269241-G	rs2360159	chr1	64118801	0.028	none	PGM1	none	NA	Th2	0	0	0	0	0	0	0	1	1	1	1	1	1	1	1	0	0	1	0	1	0	0	0	0	0	1	1	0	0	0	0	0	0
Type_1_diabetes	rs2269241-G	rs2269235	chr1	64118915	0.028	none	PGM1	none	NA	Th2	0	0	0	0	0	0	0	1	1	1	1	1	1	1	1	0	0	1	0	1	0	0	0	0	0	1	1	0	0	0	0	0	0
Type_1_diabetes	rs2269241-G	rs2269234	chr1	64118976	0.028	none	PGM1	none	NA	Th2	0	0	0	0	0	0	0	1	1	1	1	1	1	1	1	0	0	1	0	1	0	0	0	0	0	1	1	0	0	0	0	0	0
Type_1_diabetes	rs2269241-G	rs2269233	chr1	64119346	0.028	none	PGM1	none	NA	Th2	0	0	0	0	0	0	0	1	1	1	1	1	1	1	1	0	0	1	0	1	0	0	0	0	0	1	1	0	0	0	0	0	0
Type_1_diabetes	rs2269241-G	rs7541882	chr1	64121569	0.028	none	PGM1	none	NA	none	0	0	0	0	0	0	0	0	0	0	0	0	0	0	0	0	0	0	0	0	0	0	0	0	0	0	0	0	0	0	0	0	0
Type_1_diabetes	rs2476601-A	rs2476601	chr1	114377568	0.998	missense	PTPN22	none	NA	none	0	0	0	0	0	0	0	0	0	0	0	0	0	0	0	0	0	0	0	0	0	0	0	0	0	0	0	0	0	0	0	0	0
Type_1_diabetes	rs3024505-G	rs3024505	chr1	206939904	0.3747	none	none	none	NA	Th2	0	0	0	1	1	1	1	1	1	1	1	1	1	1	1	1	1	1	1	1	1	1	1	1	1	1	1	1	0	1	1	1	1
Type_1_diabetes	rs3024505-G	rs3024495	chr1	206942413	0.3747	none	IL10	none	NA	Th2	0	0	0	0	0	0	0	1	1	1	1	1	1	1	1	1	1	0	0	1	1	0	1	1	0	1	0	1	0	0	1	0	0
Type_1_diabetes	rs3024505-G	rs3024493	chr1	206943968	0.1861	none	IL10	none	NA	Th2	1	1	1	1	1	1	1	1	1	1	1	1	1	1	1	1	1	1	1	1	1	1	1	1	1	1	0	1	1	1	1	0	1
Type_1_diabetes	rs3024505-G	rs3122605	chr1	206955041	0.0395	none	none	none	NA	Th2	0	0	0	0	0	0	0	0	1	0	0	1	1	1	1	1	0	0	0	1	1	0	1	0	0	0	0	0	0	0	0	0	0
Type_1_diabetes	rs478222	rs478222	chr2	25301755	0.0859	none	EFR3B	none	NA	anterior_caudate	1	1	1	1	1	1	1	0	0	0	0	1	0	0	1	0	0	0	0	0	0	0	0	1	1	1	0	1	1	1	1	1	1
Type_1_diabetes	rs478222	rs493090	chr2	25303772	0.0859	none	EFR3B	none	NA	none	0	0	0	0	0	0	0	0	0	0	0	0	0	0	0	0	0	0	0	0	0	0	0	0	0	0	0	0	0	0	0	0	0
Type_1_diabetes	rs478222	rs483428	chr2	25305136	0.0859	none	EFR3B	none	NA	none	0	0	0	0	0	0	0	0	0	0	0	0	0	0	0	0	0	0	0	0	0	0	0	0	0	0	0	0	0	0	0	0	0
Type_1_diabetes	rs478222	rs1530016	chr2	25305756	0.0859	none	EFR3B	none	NA	none	0	0	0	0	0	0	0	0	0	0	0	0	0	0	0	0	0	0	0	0	0	0	0	0	0	0	0	0	0	0	0	0	0
Type_1_diabetes	rs478222	rs530951	chr2	25307005	0.0859	none	EFR3B	none	NA	none	0	0	0	0	0	0	0	0	0	0	0	0	0	0	0	0	0	0	0	0	0	0	0	0	0	0	0	0	0	0	0	0	0
Type_1_diabetes	rs478222	rs487617	chr2	25309756	0.0859	none	EFR3B	none	NA	none	0	0	0	0	0	0	0	0	0	0	0	0	0	0	0	0	0	0	0	0	0	0	0	0	0	0	0	0	0	0	0	0	0
Type_1_diabetes	rs478222	rs512419	chr2	25310155	0.0596	none	EFR3B	none	NA	none	0	0	0	0	0	0	0	0	0	0	0	0	0	0	0	0	0	0	0	0	0	0	0	0	0	0	0	0	0	0	0	0	0
Type_1_diabetes	rs478222	rs567359	chr2	25304574	0.041	none	EFR3B	none	NA	none	0	0	0	0	0	0	0	0	0	0	0	0	0	0	0	0	0	0	0	0	0	0	0	0	0	0	0	0	0	0	0	0	0
Type_1_diabetes	rs478222	rs551573	chr2	25305504	0.041	none	EFR3B	none	NA	none	0	0	0	0	0	0	0	0	0	0	0	0	0	0	0	0	0	0	0	0	0	0	0	0	0	0	0	0	0	0	0	0	0
Type_1_diabetes	rs478222	rs522806	chr2	25316584	0.0409	none	EFR3B	none	NA	none	0	0	0	0	0	0	0	0	0	0	0	0	0	0	0	0	0	0	0	0	0	0	0	0	0	0	0	0	0	0	0	0	0
Type_1_diabetes	rs478222	rs510107	chr2	25319471	0.0343	none	EFR3B	none	NA	none	0	0	0	0	0	0	0	0	0	0	0	0	0	0	0	0	0	0	0	0	0	0	0	0	0	0	0	0	0	0	0	0	0
Type_1_diabetes	rs478222	rs519111	chr2	25333735	0.0275	none	EFR3B	none	NA	none	0	0	0	0	0	0	0	0	0	0	0	0	0	0	0	0	0	0	0	0	0	0	0	0	0	0	0	0	0	0	0	0	0
Type_1_diabetes	rs478222	rs497567	chr2	25335089	0.0275	none	EFR3B	none	NA	none	0	0	0	0	0	0	0	0	0	0	0	0	0	0	0	0	0	0	0	0	0	0	0	0	0	0	0	0	0	0	0	0	0
Type_1_diabetes	rs1990760-C	rs1990760	chr2	163124051	0.9006	missense	IFIH1	none	NA	none	0	0	0	0	0	0	0	0	0	0	0	0	0	0	0	0	0	0	0	0	0	0	0	0	0	0	0	0	0	0	0	0	0
Type_1_diabetes	rs1990760-C	rs2111485	chr2	163110536	0.0969	none	none	none	NA	adult_CD14	1	1	1	0	0	0	0	0	0	0	0	0	1	1	0	0	1	1	0	0	0	0	0	0	0	0	0	0	1	0	1	0	0
Type_1_diabetes	rs3087243-A	rs3087243	chr2	204738919	0.4155	none	none	none	NA	CD25+_CD127-_Treg	0	0	0	0	0	0	0	1	1	1	1	1	1	1	1	0	0	0	0	0	0	0	0	0	0	0	0	0	0	0	0	0	0
Type_1_diabetes	rs3087243-A	rs11571302	chr2	204742934	0.0438	none	none	none	NA	CD25+_CD127-_Treg	0	0	1	0	0	0	0	1	1	1	1	1	1	1	1	0	1	1	0	0	1	0	0	0	0	0	0	0	0	0	0	0	0
Type_1_diabetes	rs3087243-A	rs11571316	chr2	204731089	0.0433	none	none	none	NA	CD25+_CD127-_Treg	0	0	0	0	0	0	0	1	1	1	1	1	1	1	1	1	0	0	0	0	0	0	0	0	0	0	0	0	0	0	0	0	0
Type_1_diabetes	rs3087243-A	rs11571291	chr2	204721132	0.0312	none	none	none	NA	CD25+_CD127-_Treg	0	0	0	0	0	0	0	1	1	1	1	1	1	1	1	1	1	0	0	0	0	0	0	0	0	0	0	0	0	0	0	0	0
Type_1_diabetes	rs3087243-A	rs1024162	chr2	204722159	0.0312	none	none	none	NA	CD25+_CD127-_Treg	0	0	0	0	0	0	0	1	1	1	1	1	1	1	1	1	1	1	0	0	0	0	0	0	1	1	1	0	0	0	0	0	0
Type_1_diabetes	rs3087243-A	rs7565213	chr2	204743409	0.0288	none	none	none	NA	CD25+_CD127-_Treg	0	0	0	0	0	0	0	0	0	1	1	1	1	1	1	1	0	0	0	1	1	1	0	0	1	0	0	0	0	0	1	0	0
Type_1_diabetes	rs10517086-A	rs10517086	chr4	26085511	0.1341	none	none	none	NA	Th1	0	0	0	0	0	0	0	0	1	1	1	1	1	1	1	0	1	0	0	1	0	0	0	0	1	1	0	1	1	0	1	1	1
Type_1_diabetes	rs10517086-A	rs34185821	chr4	26085480	0.1341	none	none	none	NA	Th1	0	0	0	0	0	0	0	0	1	1	1	1	1	1	1	0	1	0	0	1	0	0	0	0	1	1	0	1	1	0	1	1	1
Type_1_diabetes	rs10517086-A	rs17630466	chr4	26086569	0.1341	none	none	none	NA	Th1	0	0	0	0	0	0	0	0	1	1	1	1	1	1	1	0	0	1	0	1	1	0	1	0	0	1	0	0	0	0	1	1	0
Type_1_diabetes	rs10517086-A	rs16878091	chr4	26088128	0.0881	none	none	none	NA	AdiposeNuclei	0	0	0	1	0	0	1	0	1	0	0	1	1	1	1	1	0	1	0	0	0	0	0	1	0	1	0	0	0	0	1	1	0
Type_1_diabetes	rs10517086-A	rs932036	chr4	26090862	0.0881	none	none	none	NA	CD25-_IL17+_Th17_stim	0	0	0	0	1	0	0	0	1	1	1	1	1	1	1	1	0	1	1	1	1	1	0	0	0	1	0	0	0	0	1	1	1
Type_1_diabetes	rs10517086-A	rs4473645	chr4	26091198	0.0881	none	none	none	NA	CD25-_IL17+_Th17_stim	0	0	0	0	1	0	0	0	1	1	1	1	1	1	1	1	0	1	1	1	1	1	0	0	0	1	0	0	0	0	1	1	1
Type_1_diabetes	rs10517086-A	rs35944082	chr4	26095314	0.064	none	none	none	NA	CD25-_IL17+_Th17_stim	0	0	0	0	0	0	0	0	1	1	1	1	1	1	1	0	0	0	1	1	0	0	0	0	0	1	0	0	0	0	1	0	1
Type_1_diabetes	rs10517086-A	rs12506688	chr4	26104113	0.064	none	none	none	NA	none	0	0	0	0	0	0	0	0	0	0	0	0	0	0	0	0	0	0	0	0	0	0	0	0	0	0	0	0	0	0	0	0	0
Type_1_diabetes	rs10517086-A	rs7441808	chr4	26090375	0.0567	none	none	none	NA	CD25-_IL17+_Th17_stim	0	0	0	0	1	0	0	0	1	1	1	1	1	1	1	1	0	1	1	1	1	1	0	0	0	1	0	0	0	0	1	1	1
Type_1_diabetes	rs10517086-A	rs6448432	chr4	26098810	0.0567	none	none	none	NA	none	0	0	0	0	0	0	0	0	0	0	0	0	0	0	0	0	0	0	0	0	0	0	0	0	0	0	0	0	0	0	0	0	0
Type_1_diabetes	rs10517086-A	rs874040	chr4	26108197	0.0567	none	none	none	NA	AdiposeNuclei	1	0	0	0	1	0	0	0	0	1	1	1	0	0	0	1	1	0	0	0	0	1	1	1	1	1	0	1	0	0	1	0	1
Type_1_diabetes	rs4505848	rs4505848	chr4	123132492	0.2379	none	KIAA1109	none	NA	CD45RA_CD8	0	0	0	0	0	1	0	1	1	1	1	1	0	0	0	1	1	1	1	0	0	1	0	0	0	0	1	0	0	0	0	1	1
Type_1_diabetes	rs4505848	rs5861560	chr4	123134053	0.0914	none	KIAA1109	none	NA	Mobilized_CD34	0	0	0	0	0	0	0	1	0	1	1	1	0	1	0	1	1	1	1	1	0	1	0	0	0	0	1	0	1	0	0	1	1
Type_1_diabetes	rs4505848	rs55969942	chr4	123116862	0.0727	none	KIAA1109	none	NA	none	0	0	0	0	0	0	0	0	0	0	0	0	0	0	0	0	0	0	0	0	0	0	0	0	0	0	0	0	0	0	0	0	0
Type_1_diabetes	rs4505848	rs55904957	chr4	123116995	0.0727	none	KIAA1109	none	NA	none	0	0	0	0	0	0	0	0	0	0	0	0	0	0	0	0	0	0	0	0	0	0	0	0	0	0	0	0	0	0	0	0	0
Type_1_diabetes	rs4505848	rs7671357	chr4	123126450	0.0727	none	KIAA1109	none	NA	none	0	0	0	0	0	0	0	0	0	0	0	0	0	0	0	0	0	0	0	0	0	0	0	0	0	0	0	0	0	0	0	0	0
Type_1_diabetes	rs4505848	rs7664452	chr4	123146225	0.0656	none	KIAA1109	none	NA	none	0	0	0	0	0	0	0	0	0	0	0	0	0	0	0	0	0	0	0	0	0	0	0	0	0	0	0	0	0	0	0	0	0
Type_1_diabetes	rs4505848	rs72687044	chr4	123188501	0.0541	none	KIAA1109	none	NA	none	0	0	0	0	0	0	0	0	0	0	0	0	0	0	0	0	0	0	0	0	0	0	0	0	0	0	0	0	0	0	0	0	0
Type_1_diabetes	rs4505848	rs13147049	chr4	123193870	0.0417	none	KIAA1109	none	NA	none	0	0	0	0	0	0	0	0	0	0	0	0	0	0	0	0	0	0	0	0	0	0	0	0	0	0	0	0	0	0	0	0	0
Type_1_diabetes	rs11755527-G	rs11755527	chr6	90958231	0.6049	none	BACH2	none	NA	CD25-_IL17-_Th_stim_MACS	0	0	0	0	0	0	0	1	1	1	1	1	1	1	1	1	0	0	1	0	1	0	1	0	0	0	0	0	0	0	1	1	0
Type_1_diabetes	rs11755527-G	rs56297233	chr6	91014029	0.1345	none	none	none	NA	B_Cell_Centroblast	0	0	0	0	0	0	0	1	1	0	1	0	1	1	0	1	1	0	1	0	1	0	0	0	0	0	0	0	0	0	0	0	0
Type_1_diabetes	rs11755527-G	rs3757247	chr6	90957463	0.1268	none	BACH2	none	NA	CD25-_IL17-_Th_stim_MACS	0	0	0	0	0	0	0	1	1	0	1	1	0	1	1	1	1	0	1	0	0	0	0	0	0	0	0	1	0	0	0	0	0
Type_1_diabetes	rs9388489-G	rs9388489	chr6	126698719	0.0458	none	none	none	NA	none	0	0	0	0	0	0	0	0	0	0	0	0	0	0	0	0	0	0	0	0	0	0	0	0	0	0	0	0	0	0	0	0	0
Type_1_diabetes	rs9388489-G	rs67126256	chr6	126699050	0.0458	none	AK127472	none	NA	none	0	0	0	0	0	0	0	0	0	0	0	0	0	0	0	0	0	0	0	0	0	0	0	0	0	0	0	0	0	0	0	0	0
Type_1_diabetes	rs924043	rs924043	chr6	170379025	0.5809	none	none	none	NA	none	0	0	0	0	0	0	0	0	0	0	0	0	0	0	0	0	0	0	0	0	0	0	0	0	0	0	0	0	0	0	0	0	0
Type_1_diabetes	rs924043	rs9460213	chr6	170377812	0.2769	none	none	none	NA	none	0	0	0	0	0	0	0	0	0	0	0	0	0	0	0	0	0	0	0	0	0	0	0	0	0	0	0	0	0	0	0	0	0
Type_1_diabetes	rs924043	rs72220272	chr6	170378575	0.0979	none	none	none	NA	none	0	0	0	0	0	0	0	0	0	0	0	0	0	0	0	0	0	0	0	0	0	0	0	0	0	0	0	0	0	0	0	0	0
Type_1_diabetes	rs550448	rs550448	chr7	28229042	0.155	none	JAZF1-AS1	none	NA	none	0	0	0	0	0	0	0	0	0	0	0	0	0	0	0	0	0	0	0	0	0	0	0	0	0	0	0	0	0	0	0	0	0
Type_1_diabetes	rs550448	rs849334	chr7	28223842	0.155	none	JAZF1-AS1	none	NA	none	0	0	0	0	0	0	0	0	0	0	0	0	0	0	0	0	0	0	0	0	0	0	0	0	0	0	0	0	0	0	0	0	0
Type_1_diabetes	rs550448	rs565317	chr7	28225514	0.155	none	JAZF1-AS1	none	NA	none	0	0	0	0	0	0	0	0	0	0	0	0	0	0	0	0	0	0	0	0	0	0	0	0	0	0	0	0	0	0	0	0	0
Type_1_diabetes	rs550448	rs849328	chr7	28233408	0.155	none	JAZF1-AS1	none	NA	none	0	0	0	0	0	0	0	0	0	0	0	0	0	0	0	0	0	0	0	0	0	0	0	0	0	0	0	0	0	0	0	0	0
Type_1_diabetes	rs550448	rs515013	chr7	28216196	0.0661	none	JAZF1	JAZF1	-	adult_CD20	1	1	1	1	1	1	1	1	0	1	1	0	1	1	0	1	0	1	1	0	1	0	0	0	0	1	0	0	1	0	1	1	1
Type_1_diabetes	rs550448	rs530649	chr7	28202430	0.0659	none	JAZF1	JAZF1	-	adult_CD20	0	0	1	0	0	0	0	0	1	0	0	0	0	1	0	0	1	1	1	0	1	0	0	0	0	0	1	0	1	0	0	1	0
Type_1_diabetes	rs550448	rs849320	chr7	28208836	0.0659	none	JAZF1	JAZF1	-	adult_CD20	0	0	0	0	0	0	0	0	0	1	1	0	1	1	1	1	0	1	1	0	1	1	0	0	1	1	0	0	1	0	0	1	1
Type_1_diabetes	rs550448	rs79131915	chr7	28188046	0.0447	none	JAZF1	JAZF1	-	adult_CD20	0	0	0	0	1	0	0	0	0	1	0	0	1	0	0	0	0	1	1	0	1	0	0	0	1	0	0	1	1	0	0	0	0
Type_1_diabetes	rs550448	rs849329	chr7	28234599	0.0378	none	JAZF1-AS1	none	NA	none	0	0	0	0	0	0	0	0	0	0	0	0	0	0	0	0	0	0	0	0	0	0	0	0	0	0	0	0	0	0	0	0	0
Type_1_diabetes	rs550448	rs849315	chr7	28238860	0.0309	none	JAZF1-AS1	none	NA	none	0	0	0	0	0	0	0	0	0	0	0	0	0	0	0	0	0	0	0	0	0	0	0	0	0	0	0	0	0	0	0	0	0
Type_1_diabetes	rs4948088	rs4948088	chr7	51027194	0.2216	none	none	none	NA	HSMM-myotube	0	0	0	0	0	0	0	0	0	0	0	0	0	0	0	0	0	0	0	0	0	0	0	0	0	0	1	0	0	0	1	0	0
Type_1_diabetes	rs4948088	rs11765215	chr7	51022160	0.0405	none	none	none	NA	AdiposeNuclei	0	0	0	0	0	0	0	0	0	1	0	0	0	0	0	0	0	0	0	0	0	1	1	0	0	1	0	1	1	1	1	1	1
Type_1_diabetes	rs4948088	rs1989265	chr7	51023151	0.0405	none	none	none	NA	none	0	0	0	0	0	0	0	0	0	0	0	0	0	0	0	0	0	0	0	0	0	0	0	0	0	0	0	0	0	0	0	0	0
Type_1_diabetes	rs4948088	rs1859477	chr7	51023566	0.0405	none	none	none	NA	none	0	0	0	0	0	0	0	0	0	0	0	0	0	0	0	0	0	0	0	0	0	0	0	0	0	0	0	0	0	0	0	0	0
Type_1_diabetes	rs4948088	rs917073	chr7	51023664	0.0405	none	none	none	NA	none	0	0	0	0	0	0	0	0	0	0	0	0	0	0	0	0	0	0	0	0	0	0	0	0	0	0	0	0	0	0	0	0	0
Type_1_diabetes	rs4948088	rs7803628	chr7	51024783	0.0405	none	none	none	NA	none	0	0	0	0	0	0	0	0	0	0	0	0	0	0	0	0	0	0	0	0	0	0	0	0	0	0	0	0	0	0	0	0	0
Type_1_diabetes	rs4948088	rs4947530	chr7	51026911	0.0405	none	none	none	NA	HSMM-myotube	0	0	0	0	0	0	0	0	0	0	0	0	0	0	0	0	0	0	0	0	0	0	0	0	0	0	1	0	0	0	1	0	0
Type_1_diabetes	rs4948088	rs1018979	chr7	51027616	0.0405	none	none	none	NA	HSMM-myotube	0	0	0	0	0	0	0	0	0	0	0	0	0	0	0	0	0	0	0	0	0	0	0	0	0	0	1	0	0	0	1	0	0
Type_1_diabetes	rs4948088	rs1018980	chr7	51027685	0.0405	none	none	none	NA	HSMM-myotube	0	0	0	0	0	0	0	0	0	0	0	0	0	0	0	0	0	0	0	0	0	0	0	0	0	0	1	0	0	0	1	0	0
Type_1_diabetes	rs4948088	rs1018941	chr7	51028322	0.0405	none	none	none	NA	HSMM-myotube	0	0	0	0	0	0	0	0	0	0	0	0	0	0	0	0	0	0	0	0	0	0	0	0	0	0	0	0	0	0	1	0	0
Type_1_diabetes	rs12679857	rs12679857	chr8	119977337	0.8649	none	none	none	NA	none	0	0	0	0	0	0	0	0	0	0	0	0	0	0	0	0	0	0	0	0	0	0	0	0	0	0	0	0	0	0	0	0	0
Type_1_diabetes	rs12679857	rs1032129	chr8	119951900	0.0783	none	TNFRSF11B	none	NA	none	0	0	0	0	0	0	0	0	0	0	0	0	0	0	0	0	0	0	0	0	0	0	0	0	0	0	0	0	0	0	0	0	0
Type_1_diabetes	rs7020673	rs7020673	chr9	4291747	0.2302	none	GLIS3	none	NA	chondrogenic_dif_cells	0	0	0	0	0	0	0	0	0	1	0	1	0	0	0	1	0	0	1	0	0	0	0	0	1	0	0	0	1	1	1	1	1
Type_1_diabetes	rs7020673	rs10814914	chr9	4289196	0.109	none	GLIS3	none	NA	Pancreatic_Islets	0	0	0	0	0	0	0	0	1	0	0	0	0	0	0	0	0	0	0	0	1	0	0	0	0	0	0	0	1	1	0	1	1
Type_1_diabetes	rs7020673	rs7867224	chr9	4292152	0.0788	none	GLIS3	none	NA	chondrogenic_dif_cells	0	0	0	0	0	0	0	0	0	1	0	1	0	0	0	1	0	0	1	0	0	0	0	0	1	0	0	0	1	1	1	1	1
Type_1_diabetes	rs7020673	rs7024686	chr9	4287211	0.0785	none	GLIS3	none	NA	Pancreatic_Islets	0	0	0	0	0	1	0	0	0	0	0	0	0	0	0	0	0	0	0	0	0	0	0	1	1	0	0	0	1	1	0	1	1
Type_1_diabetes	rs7020673	rs10974435	chr9	4283682	0.0716	none	GLIS3	none	NA	none	0	0	0	0	0	0	0	0	0	0	0	0	0	0	0	0	0	0	0	0	0	0	0	0	0	0	0	0	0	0	0	0	0
Type_1_diabetes	rs7020673	rs10758591	chr9	4285986	0.0715	none	GLIS3	none	NA	none	0	0	0	0	0	0	0	0	0	0	0	0	0	0	0	0	0	0	0	0	0	0	0	0	0	0	0	0	0	0	0	0	0
Type_1_diabetes	rs7020673	rs7041847	chr9	4287466	0.0715	none	GLIS3	none	NA	Pancreatic_Islets	0	0	0	0	0	1	0	0	0	0	0	0	0	0	0	0	0	0	0	0	0	0	0	1	1	0	0	0	1	1	0	1	1
Type_1_diabetes	rs7020673	rs4380994	chr9	4282536	0.0603	none	GLIS3	none	NA	none	0	0	0	0	0	0	0	0	0	0	0	0	0	0	0	0	0	0	0	0	0	0	0	0	0	0	0	0	0	0	0	0	0
Type_1_diabetes	rs7020673	rs6476842	chr9	4291268	0.0483	none	GLIS3	none	NA	Pancreatic_Islets	0	0	0	0	0	0	0	0	0	0	0	0	0	0	0	0	0	0	0	0	0	0	0	0	1	0	0	0	1	1	1	1	1
Type_1_diabetes	rs7020673	rs7034200	chr9	4289050	0.0448	none	GLIS3	none	NA	Pancreatic_Islets	0	0	0	0	0	0	0	0	1	0	0	0	0	0	0	0	0	0	0	0	1	0	0	0	0	0	0	0	1	1	0	1	1
Type_1_diabetes	rs7020673	rs10814917	chr9	4296430	0.0444	none	GLIS3	none	NA	Pancreatic_Islets	1	1	1	1	1	1	1	1	0	0	1	1	0	1	0	1	0	0	0	0	1	0	0	1	1	1	0	1	1	1	1	1	1
Type_1_diabetes	rs7020673	rs57884925	chr9	4285119	0.034	none	GLIS3	none	NA	none	0	0	0	0	0	0	0	0	0	0	0	0	0	0	0	0	0	0	0	0	0	0	0	0	0	0	0	0	0	0	0	0	0
Type_1_diabetes	rs7020673	rs4339696	chr9	4295880	0.0335	none	GLIS3	none	NA	Pancreatic_Islets	1	1	1	1	1	1	1	1	0	0	1	1	0	1	0	1	0	0	0	0	1	0	0	1	1	1	0	1	1	1	1	1	1
Type_1_diabetes	rs12251307	rs12251307	chr10	6123495	0.4147	none	none	none	NA	Th2	1	1	1	0	0	0	0	0	0	1	1	0	1	1	1	0	0	0	0	0	1	0	1	0	0	0	0	0	0	0	0	0	0
Type_1_diabetes	rs12251307	rs11256611	chr10	6122382	0.4147	none	none	none	NA	none	0	0	0	0	0	0	0	0	0	0	0	0	0	0	0	0	0	0	0	0	0	0	0	0	0	0	0	0	0	0	0	0	0
Type_1_diabetes	rs12251307	rs61839680	chr10	6123716	0.1352	none	none	none	NA	Th2	1	1	1	0	0	0	0	0	0	1	1	0	1	1	1	0	0	0	0	0	1	0	1	0	0	0	0	0	0	0	0	0	0
Type_1_diabetes	rs947474-G	rs947474	chr10	6390450	0.3805	none	none	none	NA	B_Cell_Centroblast	1	1	1	1	1	1	1	1	1	1	1	1	1	1	1	1	1	1	1	1	1	1	1	1	1	1	0	1	0	1	1	1	1
Type_1_diabetes	rs947474-G	rs2181623	chr10	6391491	0.0575	none	none	none	NA	B_Cell_Centroblast	0	0	1	1	1	1	1	1	1	1	1	1	1	1	1	1	0	1	0	0	1	1	0	0	1	0	0	1	0	0	0	0	0
Type_1_diabetes	rs947474-G	rs4750316	chr10	6393260	0.048	none	none	none	NA	none	0	0	0	0	0	0	0	0	0	0	0	0	0	0	0	0	0	0	0	0	0	0	0	0	0	0	0	0	0	0	0	0	0
Type_1_diabetes	rs947474-G	rs11258264	chr10	6399357	0.0439	none	none	none	NA	none	0	0	0	0	0	0	0	0	0	0	0	0	0	0	0	0	0	0	0	0	0	0	0	0	0	0	0	0	0	0	0	0	0
Type_1_diabetes	rs947474-G	rs4589176	chr10	6401579	0.0439	none	none	none	NA	none	0	0	0	0	0	0	0	0	0	0	0	0	0	0	0	0	0	0	0	0	0	0	0	0	0	0	0	0	0	0	0	0	0
Type_1_diabetes	rs947474-G	rs4558075	chr10	6401625	0.0439	none	none	none	NA	none	0	0	0	0	0	0	0	0	0	0	0	0	0	0	0	0	0	0	0	0	0	0	0	0	0	0	0	0	0	0	0	0	0
Type_1_diabetes	rs947474-G	rs10752291	chr10	6402679	0.0439	none	none	none	NA	none	0	0	0	0	0	0	0	0	0	0	0	0	0	0	0	0	0	0	0	0	0	0	0	0	0	0	0	0	0	0	0	0	0
Type_1_diabetes	rs947474-G	rs10796045	chr10	6402741	0.0439	none	none	none	NA	none	0	0	0	0	0	0	0	0	0	0	0	0	0	0	0	0	0	0	0	0	0	0	0	0	0	0	0	0	0	0	0	0	0
Type_1_diabetes	rs947474-G	rs59072983	chr10	6393706	0.0408	utr3	none	none	NA	none	0	0	0	0	0	0	0	0	0	0	0	0	0	0	0	0	0	0	0	0	0	0	0	0	0	0	0	0	0	0	0	0	0
Type_1_diabetes	rs947474-G	rs10796035	chr10	6396623	0.0405	none	none	none	NA	none	0	0	0	0	0	0	0	0	0	0	0	0	0	0	0	0	0	0	0	0	0	0	0	0	0	0	0	0	0	0	0	0	0
Type_1_diabetes	rs947474-G	rs10796040	chr10	6398944	0.0405	none	none	none	NA	none	0	0	0	0	0	0	0	0	0	0	0	0	0	0	0	0	0	0	0	0	0	0	0	0	0	0	0	0	0	0	0	0	0
Type_1_diabetes	rs947474-G	rs10796038	chr10	6397964	0.0403	none	none	none	NA	none	0	0	0	0	0	0	0	0	0	0	0	0	0	0	0	0	0	0	0	0	0	0	0	0	0	0	0	0	0	0	0	0	0
Type_1_diabetes	rs947474-G	rs2146900	chr10	6403050	0.0338	none	none	none	NA	none	0	0	0	0	0	0	0	0	0	0	0	0	0	0	0	0	0	0	0	0	0	0	0	0	0	0	0	0	0	0	0	0	0
Type_1_diabetes	rs947474-G	rs1570527	chr10	6404700	0.0338	none	none	none	NA	none	0	0	0	0	0	0	0	0	0	0	0	0	0	0	0	0	0	0	0	0	0	0	0	0	0	0	0	0	0	0	0	0	0
Type_1_diabetes	rs947474-G	rs2387397	chr10	6390192	0.0324	none	none	none	NA	B_Cell_Centroblast	1	1	1	1	1	1	1	1	1	1	1	1	1	1	1	1	1	1	1	1	1	1	1	1	1	1	0	1	0	1	1	1	1
Type_1_diabetes	rs10509540	rs10509540	chr10	90023033	0.7808	none	RNLS	none	NA	GM12878	0	0	0	0	0	0	0	0	0	1	0	0	0	0	0	1	0	0	1	1	1	0	0	0	0	0	0	0	0	0	0	0	0
Type_1_diabetes	rs10509540	rs286487	chr10	90030119	0.0855	none	RNLS	none	NA	GM12878	0	0	0	1	1	1	1	0	1	1	1	1	1	1	0	1	1	1	1	1	1	0	0	1	1	1	0	1	0	1	1	1	1
Type_1_diabetes	rs10509540	rs166976	chr10	90024599	0.0586	none	RNLS	none	NA	none	0	0	0	0	0	0	0	0	0	0	0	0	0	0	0	0	0	0	0	0	0	0	0	0	0	0	0	0	0	0	0	0	0
Type_1_diabetes	rs10509540	rs2018705	chr10	90047350	0.0293	none	RNLS	none	NA	none	0	0	0	0	0	0	0	0	0	0	0	0	0	0	0	0	0	0	0	0	0	0	0	0	0	0	0	0	0	0	0	0	0
Type_1_diabetes	rs7111341	rs7111341	chr11	2213166	0.0821	none	none	none	NA	adult_CD14	0	0	0	0	0	0	0	0	0	0	0	0	0	0	0	0	0	1	0	0	0	1	0	0	0	0	0	0	1	0	0	0	0
Type_1_diabetes	rs7111341	rs67957462	chr11	2212448	0.0821	none	none	none	NA	Pancreatic_Islets	0	0	0	0	1	0	0	0	0	0	0	0	0	1	0	0	0	1	1	0	1	1	0	1	1	0	0	0	1	0	1	0	0
Type_1_diabetes	rs7111341	rs76361611	chr11	2212584	0.0821	none	none	none	NA	Pancreatic_Islets	0	0	0	0	1	0	0	0	0	0	0	0	0	1	0	0	0	1	1	0	1	1	0	1	1	0	0	0	1	0	1	0	0
Type_1_diabetes	rs7111341	rs7110836	chr11	2212765	0.0821	none	none	none	NA	Pancreatic_Islets	0	0	0	0	1	0	0	0	0	0	0	0	0	1	0	0	0	1	1	0	1	1	0	1	1	0	0	0	1	0	1	0	0
Type_1_diabetes	rs7111341	rs7129293	chr11	2212858	0.0821	none	none	none	NA	Pancreatic_Islets	0	0	0	0	1	0	0	0	0	0	0	0	0	1	0	0	0	1	1	0	1	1	0	1	1	0	0	0	1	0	1	0	0
Type_1_diabetes	rs7111341	rs7121197	chr11	2213258	0.0821	none	none	none	NA	adult_CD14	0	0	0	0	0	0	0	0	0	0	0	0	0	0	0	0	0	1	0	0	0	1	0	0	0	0	0	0	1	0	0	0	0
Type_1_diabetes	rs7111341	rs11564701	chr11	2213492	0.0821	none	none	none	NA	adult_CD14	0	0	0	0	0	0	0	0	0	0	0	0	0	0	0	0	0	1	0	0	0	1	0	0	0	0	0	0	1	0	0	0	0
Type_1_diabetes	rs7111341	rs11564700	chr11	2213579	0.0821	none	none	none	NA	adult_CD14	0	0	0	0	0	0	0	0	0	0	0	0	0	0	0	0	0	1	0	0	0	1	0	0	0	0	0	0	1	0	0	0	0
Type_1_diabetes	rs7111341	rs60042129	chr11	2214016	0.0821	none	none	none	NA	none	0	0	0	0	0	0	0	0	0	0	0	0	0	0	0	0	0	0	0	0	0	0	0	0	0	0	0	0	0	0	0	0	0
Type_1_diabetes	rs7111341	rs11564691	chr11	2214039	0.0821	none	none	none	NA	none	0	0	0	0	0	0	0	0	0	0	0	0	0	0	0	0	0	0	0	0	0	0	0	0	0	0	0	0	0	0	0	0	0
Type_1_diabetes	rs7111341	rs113607956	chr11	2212723	0.03	none	none	none	NA	Pancreatic_Islets	0	0	0	0	1	0	0	0	0	0	0	0	0	1	0	0	0	1	1	0	1	1	0	1	1	0	0	0	1	0	1	0	0
Type_1_diabetes	rs7111341	rs11564696	chr11	2213694	0.03	none	none	none	NA	adult_CD14	0	0	0	0	0	0	0	0	0	0	0	0	0	0	0	0	0	1	0	0	0	1	0	0	0	0	0	0	1	0	0	0	0
Type_1_diabetes	rs7111341	rs7947138	chr11	2214467	0.03	none	none	none	NA	none	0	0	0	0	0	0	0	0	0	0	0	0	0	0	0	0	0	0	0	0	0	0	0	0	0	0	0	0	0	0	0	0	0
Type_1_diabetes	rs7111341	rs7107390	chr11	2214811	0.03	none	none	none	NA	none	0	0	0	0	0	0	0	0	0	0	0	0	0	0	0	0	0	0	0	0	0	0	0	0	0	0	0	0	0	0	0	0	0
Type_1_diabetes	rs4763879-A	rs4763879	chr12	9910164	0.3703	none	CD69	none	NA	Th2	0	0	0	0	0	0	0	1	1	1	1	1	1	1	1	1	1	0	1	1	1	1	1	1	0	0	0	0	0	0	0	0	0
Type_1_diabetes	rs4763879-A	rs61163981	chr12	9910449	0.3703	none	CD69	none	NA	CD45RO_CD8	0	0	0	0	1	1	1	1	1	1	1	1	1	1	1	1	1	1	1	1	1	1	1	1	1	0	0	1	0	1	0	0	0
Type_1_diabetes	rs4763879-A	rs917911	chr12	9905851	0.2406	utr3	CD69	none	NA	CD25-_IL17-_Th_stim_MACS	0	0	0	0	0	0	0	1	1	1	1	1	1	1	1	1	1	0	1	1	0	1	0	0	0	0	0	0	0	0	0	0	0
Type_1_diabetes	rs2292239-T	rs2292239	chr12	56482180	0.4211	none	ERBB3	none	NA	none	0	0	0	0	0	0	0	0	0	0	0	0	0	0	0	0	0	0	0	0	0	0	0	0	0	0	0	0	0	0	0	0	0
Type_1_diabetes	rs2292239-T	rs705696	chr12	56480648	0.2133	none	ERBB3	none	NA	colonic_mucosa	1	1	1	1	1	1	1	1	0	0	0	0	0	0	0	0	0	0	0	0	0	0	1	1	1	0	1	1	0	1	1	0	0
Type_1_diabetes	rs2292239-T	rs877636	chr12	56480583	0.1598	none	ERBB3	none	NA	colonic_mucosa	1	1	1	1	1	1	1	1	0	0	0	0	0	0	0	0	0	0	0	0	0	0	1	1	1	0	1	1	0	1	1	0	0
Type_1_diabetes	rs2292239-T	rs3741499	chr12	56474379	0.0864	none	ERBB3	none	NA	substantia_nigra	1	1	1	1	1	1	1	1	1	0	1	1	1	1	0	1	1	1	0	0	1	1	1	1	1	0	1	1	1	1	1	0	0
Type_1_diabetes	rs2292239-T	rs4759229	chr12	56474480	0.0864	none	ERBB3	none	NA	substantia_nigra	1	1	1	1	1	1	1	1	1	0	1	1	1	1	0	1	1	1	0	0	1	1	1	1	1	0	1	1	1	1	1	0	0
Type_1_diabetes	rs3184504-T	rs3184504	chr12	111884608	0.8709	missense	SH2B3	none	NA	Pancreatic_Islets	1	1	1	1	1	1	1	1	1	1	1	1	1	1	1	1	1	1	1	1	1	1	1	1	1	1	1	1	1	1	1	1	1
Type_1_diabetes	rs3184504-T	rs7310615	chr12	111865049	0.0582	none	SH2B3	none	NA	colonic_mucosa	1	1	1	1	1	1	1	1	1	1	1	1	1	1	1	1	1	1	1	1	1	1	1	1	1	1	0	1	1	1	1	1	1
Type_1_diabetes	rs3184504-T	rs4766578	chr12	111904371	0.0279	none	ATXN2	none	NA	none	0	0	0	0	0	0	0	0	0	0	0	0	0	0	0	0	0	0	0	0	0	0	0	0	0	0	0	0	0	0	0	0	0
Type_1_diabetes	rs3184504-T	rs10774625	chr12	111910219	0.0276	none	ATXN2	none	NA	none	0	0	0	0	0	0	0	0	0	0	0	0	0	0	0	0	0	0	0	0	0	0	0	0	0	0	0	0	0	0	0	0	0
Type_1_diabetes	rs17696736-G	rs17696736	chr12	112486818	0.9999	none	NAA25	none	NA	Mobilized_CD34	1	1	1	1	1	1	1	1	1	1	1	1	0	0	0	1	1	1	1	1	1	1	0	0	0	1	0	1	1	1	1	1	1
Type_1_diabetes	rs539514	rs539514	chr13	76326282	0.3891	none	LMO7	none	NA	none	0	0	0	0	0	0	0	0	0	0	0	0	0	0	0	0	0	0	0	0	0	0	0	0	0	0	0	0	0	0	0	0	0
Type_1_diabetes	rs539514	rs625755	chr13	76326701	0.3891	none	LMO7	none	NA	none	0	0	0	0	0	0	0	0	0	0	0	0	0	0	0	0	0	0	0	0	0	0	0	0	0	0	0	0	0	0	0	0	0
Type_1_diabetes	rs539514	rs530855	chr13	76337780	0.1712	none	LMO7	none	NA	CD25-_CD45RA+_naive	0	0	0	0	0	0	1	1	1	1	1	0	1	1	1	1	0	0	0	1	1	1	0	1	1	0	1	1	1	1	1	1	1
Type_1_diabetes	rs1465788	rs1465788	chr14	69263599	0.1599	none	none	none	NA	adult_CD20	1	1	1	1	1	1	1	1	1	1	1	1	1	1	1	1	1	1	1	1	1	1	1	1	1	1	1	1	1	1	1	1	1
Type_1_diabetes	rs1465788	rs6573857	chr14	69263074	0.1599	none	none	none	NA	adult_CD20	1	1	1	1	1	1	1	1	1	1	1	1	1	1	1	1	1	1	1	1	1	1	1	1	1	1	1	1	1	1	1	1	1
Type_1_diabetes	rs1465788	rs1595260	chr14	69267695	0.1599	none	none	none	NA	B_Cell_Centroblast	0	0	0	0	0	0	0	1	0	1	1	0	0	0	0	1	1	0	1	1	1	1	0	0	0	0	1	0	0	0	1	1	1
Type_1_diabetes	rs1465788	rs1595261	chr14	69268399	0.0998	none	none	none	NA	B_Cell_Centroblast	0	0	0	0	0	0	0	1	0	1	1	0	0	0	0	1	1	0	1	1	1	1	0	0	0	0	1	0	0	0	1	1	1
Type_1_diabetes	rs1465788	rs3742887	chr14	69262441	0.0815	none	ZFP36L1	none	NA	adult_CD20	1	1	1	1	1	1	1	1	1	1	1	1	1	1	1	1	1	1	1	1	1	1	1	1	1	1	1	1	1	1	1	1	1
Type_1_diabetes	rs1465788	rs11294653	chr14	69272298	0.0696	none	none	none	NA	adult_CD20	1	1	1	1	1	0	1	1	1	1	1	0	0	0	1	0	1	0	1	1	1	1	0	1	1	0	1	1	1	1	1	0	0
Type_1_diabetes	rs1465788	rs7149271	chr14	69272643	0.0696	none	none	none	NA	adult_CD20	1	1	1	1	1	0	1	1	1	1	1	0	0	0	1	0	1	0	1	1	1	1	0	1	1	0	1	1	1	1	1	0	0
Type_1_diabetes	rs1465788	rs4899258	chr14	69272319	0.054	none	none	none	NA	adult_CD20	1	1	1	1	1	0	1	1	1	1	1	0	0	0	1	0	1	0	1	1	1	1	0	1	1	0	1	1	1	1	1	0	0
Type_1_diabetes	rs1465788	rs194751	chr14	69270727	0.0539	none	none	none	NA	adult_CD20	0	0	0	0	0	0	0	1	0	0	0	1	1	1	0	0	0	0	1	1	0	0	0	0	0	0	0	1	0	0	0	0	0
Type_1_diabetes	rs1465788	rs1836984	chr14	69270891	0.0277	none	none	none	NA	adult_CD20	0	0	0	0	0	0	0	1	0	0	0	1	1	1	0	0	0	0	1	1	0	0	0	0	0	0	0	1	0	0	0	0	0
Type_1_diabetes	rs4900384-G	rs4900384	chr14	98498951	0.0865	none	none	none	NA	none	0	0	0	0	0	0	0	0	0	0	0	0	0	0	0	0	0	0	0	0	0	0	0	0	0	0	0	0	0	0	0	0	0
Type_1_diabetes	rs4900384-G	rs4144155	chr14	98491332	0.0314	none	none	none	NA	none	0	0	0	0	0	0	0	0	0	0	0	0	0	0	0	0	0	0	0	0	0	0	0	0	0	0	0	0	0	0	0	0	0
Type_1_diabetes	rs4900384-G	rs36025852	chr14	98496132	0.0314	none	none	none	NA	none	0	0	0	0	0	0	0	0	0	0	0	0	0	0	0	0	0	0	0	0	0	0	0	0	0	0	0	0	0	0	0	0	0
Type_1_diabetes	rs4900384-G	rs922408	chr14	98486120	0.0288	none	none	none	NA	CD45RA_CD8	0	0	0	0	0	0	0	1	1	1	1	1	1	1	1	1	1	0	0	0	0	0	0	0	0	0	0	0	0	0	0	0	0
Type_1_diabetes	rs4900384-G	rs922409	chr14	98486231	0.0288	none	none	none	NA	none	0	0	0	0	0	0	0	0	0	0	0	0	0	0	0	0	0	0	0	0	0	0	0	0	0	0	0	0	0	0	0	0	0
Type_1_diabetes	rs4900384-G	rs10137906	chr14	98490569	0.0288	none	none	none	NA	none	0	0	0	0	0	0	0	0	0	0	0	0	0	0	0	0	0	0	0	0	0	0	0	0	0	0	0	0	0	0	0	0	0
Type_1_diabetes	rs4900384-G	rs7144501	chr14	98495938	0.0288	none	none	none	NA	none	0	0	0	0	0	0	0	0	0	0	0	0	0	0	0	0	0	0	0	0	0	0	0	0	0	0	0	0	0	0	0	0	0
Type_1_diabetes	rs4900384-G	rs11622689	chr14	98496560	0.0288	none	none	none	NA	none	0	0	0	0	0	0	0	0	0	0	0	0	0	0	0	0	0	0	0	0	0	0	0	0	0	0	0	0	0	0	0	0	0
Type_1_diabetes	rs4900384-G	rs11628807	chr14	98485111	0.0287	none	none	none	NA	none	0	0	0	0	0	0	0	0	0	0	0	0	0	0	0	0	0	0	0	0	0	0	0	0	0	0	0	0	0	0	0	0	0
Type_1_diabetes	rs4900384-G	rs4383076	chr14	98485127	0.0287	none	none	none	NA	CD45RA_CD8	0	0	0	0	0	0	0	1	1	1	1	1	1	1	1	1	1	0	0	0	0	0	0	0	0	0	0	0	0	0	0	0	0
Type_1_diabetes	rs4900384-G	rs11160429	chr14	98485440	0.0287	none	none	none	NA	CD45RA_CD8	0	0	0	0	0	0	0	1	1	1	1	1	1	1	1	1	1	0	0	0	0	0	0	0	0	0	0	0	0	0	0	0	0
Type_1_diabetes	rs4900384-G	rs10138574	chr14	98485515	0.0287	none	none	none	NA	CD45RA_CD8	0	0	0	0	0	0	0	1	1	1	1	1	1	1	1	1	1	0	0	0	0	0	0	0	0	0	0	0	0	0	0	0	0
Type_1_diabetes	rs4900384-G	rs10150955	chr14	98485583	0.0287	none	none	none	NA	CD45RA_CD8	0	0	0	0	0	0	0	1	1	1	1	1	1	1	1	1	1	0	0	0	0	0	0	0	0	0	0	0	0	0	0	0	0
Type_1_diabetes	rs4900384-G	rs10138969	chr14	98485805	0.0287	none	none	none	NA	CD45RA_CD8	0	0	0	0	0	0	0	1	1	1	1	1	1	1	1	1	1	0	0	0	0	0	0	0	0	0	0	0	0	0	0	0	0
Type_1_diabetes	rs4900384-G	rs10138885	chr14	98485820	0.0287	none	none	none	NA	CD45RA_CD8	0	0	0	0	0	0	0	1	1	1	1	1	1	1	1	1	1	0	0	0	0	0	0	0	0	0	0	0	0	0	0	0	0
Type_1_diabetes	rs4900384-G	rs922406	chr14	98486020	0.0287	none	none	none	NA	CD45RA_CD8	0	0	0	0	0	0	0	1	1	1	1	1	1	1	1	1	1	0	0	0	0	0	0	0	0	0	0	0	0	0	0	0	0
Type_1_diabetes	rs4900384-G	rs922407	chr14	98486053	0.0287	none	none	none	NA	CD45RA_CD8	0	0	0	0	0	0	0	1	1	1	1	1	1	1	1	1	1	0	0	0	0	0	0	0	0	0	0	0	0	0	0	0	0
Type_1_diabetes	rs4900384-G	rs2895665	chr14	98486373	0.0287	none	none	none	NA	none	0	0	0	0	0	0	0	0	0	0	0	0	0	0	0	0	0	0	0	0	0	0	0	0	0	0	0	0	0	0	0	0	0
Type_1_diabetes	rs4900384-G	rs10142119	chr14	98486545	0.0287	none	none	none	NA	none	0	0	0	0	0	0	0	0	0	0	0	0	0	0	0	0	0	0	0	0	0	0	0	0	0	0	0	0	0	0	0	0	0
Type_1_diabetes	rs4900384-G	rs7143957	chr14	98486622	0.0287	none	none	none	NA	none	0	0	0	0	0	0	0	0	0	0	0	0	0	0	0	0	0	0	0	0	0	0	0	0	0	0	0	0	0	0	0	0	0
Type_1_diabetes	rs4900384-G	rs7143039	chr14	98486883	0.0287	none	none	none	NA	none	0	0	0	0	0	0	0	0	0	0	0	0	0	0	0	0	0	0	0	0	0	0	0	0	0	0	0	0	0	0	0	0	0
Type_1_diabetes	rs4900384-G	rs10134419	chr14	98487587	0.0287	none	none	none	NA	none	0	0	0	0	0	0	0	0	0	0	0	0	0	0	0	0	0	0	0	0	0	0	0	0	0	0	0	0	0	0	0	0	0
Type_1_diabetes	rs4900384-G	rs7148853	chr14	98487763	0.0287	none	none	none	NA	none	0	0	0	0	0	0	0	0	0	0	0	0	0	0	0	0	0	0	0	0	0	0	0	0	0	0	0	0	0	0	0	0	0
Type_1_diabetes	rs4900384-G	rs1456988	chr14	98488007	0.0287	none	none	none	NA	none	0	0	0	0	0	0	0	0	0	0	0	0	0	0	0	0	0	0	0	0	0	0	0	0	0	0	0	0	0	0	0	0	0
Type_1_diabetes	rs4900384-G	rs1456989	chr14	98488804	0.0287	none	none	none	NA	none	0	0	0	0	0	0	0	0	0	0	0	0	0	0	0	0	0	0	0	0	0	0	0	0	0	0	0	0	0	0	0	0	0
Type_1_diabetes	rs4900384-G	rs1456990	chr14	98488886	0.0287	none	none	none	NA	none	0	0	0	0	0	0	0	0	0	0	0	0	0	0	0	0	0	0	0	0	0	0	0	0	0	0	0	0	0	0	0	0	0
Type_1_diabetes	rs4900384-G	rs1350276	chr14	98489408	0.0287	none	none	none	NA	none	0	0	0	0	0	0	0	0	0	0	0	0	0	0	0	0	0	0	0	0	0	0	0	0	0	0	0	0	0	0	0	0	0
Type_1_diabetes	rs4900384-G	rs1350277	chr14	98492843	0.0287	none	none	none	NA	none	0	0	0	0	0	0	0	0	0	0	0	0	0	0	0	0	0	0	0	0	0	0	0	0	0	0	0	0	0	0	0	0	0
Type_1_diabetes	rs4900384-G	rs28480229	chr14	98494678	0.0287	none	none	none	NA	none	0	0	0	0	0	0	0	0	0	0	0	0	0	0	0	0	0	0	0	0	0	0	0	0	0	0	0	0	0	0	0	0	0
Type_1_diabetes	rs941576-A	rs941576	chr14	101306045	0.3854	none	MEG3	none	NA	none	0	0	0	0	0	0	0	0	0	0	0	0	0	0	0	0	0	0	0	0	0	0	0	0	0	0	0	0	0	0	0	0	0
Type_1_diabetes	rs941576-A	rs34861415	chr14	101306284	0.3854	none	MEG3	none	NA	none	0	0	0	0	0	0	0	0	0	0	0	0	0	0	0	0	0	0	0	0	0	0	0	0	0	0	0	0	0	0	0	0	0
Type_1_diabetes	rs941576-A	rs56994090	chr14	101306447	0.0867	none	MEG3	none	NA	none	0	0	0	0	0	0	0	0	0	0	0	0	0	0	0	0	0	0	0	0	0	0	0	0	0	0	0	0	0	0	0	0	0
Type_1_diabetes	rs941576-A	rs34552516	chr14	101306841	0.0751	none	MEG3	none	NA	none	0	0	0	0	0	0	0	0	0	0	0	0	0	0	0	0	0	0	0	0	0	0	0	0	0	0	0	0	0	0	0	0	0
Type_1_diabetes	rs941576-A	rs8022656	chr14	101307542	0.0577	none	MEG3	none	NA	none	0	0	0	0	0	0	0	0	0	0	0	0	0	0	0	0	0	0	0	0	0	0	0	0	0	0	0	0	0	0	0	0	0
Type_1_diabetes	rs3825932	rs3825932	chr15	79235446	0.1339	none	CTSH	none	NA	GM12878	1	1	1	1	1	1	1	0	1	0	1	1	0	1	1	0	1	1	1	1	1	1	1	1	1	1	1	1	1	1	1	0	0
Type_1_diabetes	rs3825932	rs2870085	chr15	79234268	0.0807	none	CTSH	none	NA	GM12878	0	0	1	0	1	1	1	0	1	0	0	1	0	1	0	0	0	1	1	1	1	0	1	1	1	1	1	1	0	1	0	0	0
Type_1_diabetes	rs3825932	rs10400877	chr15	79234378	0.0807	none	CTSH	none	NA	GM12878	0	0	1	0	1	1	1	0	1	0	0	1	0	1	0	0	0	1	1	1	1	0	1	1	1	1	1	1	0	1	0	0	0
Type_1_diabetes	rs3825932	rs10400881	chr15	79234384	0.0807	none	CTSH	none	NA	GM12878	0	0	1	0	1	1	1	0	1	0	0	1	0	1	0	0	0	1	1	1	1	0	1	1	1	1	1	1	0	1	0	0	0
Type_1_diabetes	rs3825932	rs11855406	chr15	79234864	0.0807	none	CTSH	none	NA	GM12878	0	0	1	0	1	1	1	0	1	0	0	1	0	1	0	0	0	1	1	1	1	0	1	1	1	1	1	1	0	1	0	0	0
Type_1_diabetes	rs3825932	rs11072815	chr15	79232319	0.0548	none	CTSH	none	NA	B_Cell_Centroblast	1	1	1	1	1	1	1	0	1	1	1	1	1	1	1	0	1	1	1	1	1	1	1	1	1	1	1	1	0	1	0	0	0
Type_1_diabetes	rs3825932	rs11856301	chr15	79232330	0.0548	none	CTSH	none	NA	B_Cell_Centroblast	1	1	1	1	1	1	1	0	1	1	1	1	1	1	1	0	1	1	1	1	1	1	1	1	1	1	1	1	0	1	0	0	0
Type_1_diabetes	rs3825932	rs34333304	chr15	79232525	0.0548	none	CTSH	none	NA	B_Cell_Centroblast	1	1	1	1	1	1	1	0	1	1	1	1	1	1	1	0	1	1	1	1	1	1	1	1	1	1	1	1	0	1	0	0	0
Type_1_diabetes	rs3825932	rs28655102	chr15	79232700	0.0548	none	CTSH	none	NA	B_Cell_Centroblast	1	1	1	1	1	1	1	0	1	1	1	1	1	1	1	0	1	1	1	1	1	1	1	1	1	1	1	1	0	1	0	0	0
Type_1_diabetes	rs3825932	rs10152589	chr15	79233255	0.0548	none	CTSH	none	NA	B_Cell_Centroblast	0	0	0	0	1	0	1	0	0	1	1	1	1	1	0	0	0	1	1	1	1	0	0	0	0	0	0	0	0	1	0	0	0
Type_1_diabetes	rs3825932	rs4778716	chr15	79233626	0.0548	none	CTSH	none	NA	B_Cell_Centroblast	0	0	0	0	1	0	1	0	0	1	1	1	1	1	0	0	0	1	1	1	1	0	0	0	0	0	0	0	0	1	0	0	0
Type_1_diabetes	rs3825932	rs10152587	chr15	79233225	0.0474	none	CTSH	none	NA	B_Cell_Centroblast	0	0	0	0	1	0	1	0	0	1	1	1	1	1	0	0	0	1	1	1	1	0	0	0	0	0	0	0	0	1	0	0	0
Type_1_diabetes	rs12708716-G	rs12708716	chr16	11179873	0.2815	none	CLEC16A	none	NA	Th2	0	0	0	0	0	0	0	0	1	1	1	1	1	1	1	0	0	0	1	1	0	1	1	1	1	0	0	0	0	1	0	0	0
Type_1_diabetes	rs12708716-G	rs7203793	chr16	11182134	0.1054	none	CLEC16A	none	NA	Th2	0	1	0	0	0	0	0	1	1	1	1	1	1	1	1	1	1	0	1	1	1	1	1	1	1	0	1	0	0	1	0	1	0
Type_1_diabetes	rs12708716-G	rs9929994	chr16	11178245	0.1051	none	CLEC16A	none	NA	Th2	0	1	0	0	1	0	0	1	0	1	1	0	1	1	1	1	1	1	1	1	1	0	1	1	1	1	1	1	1	1	1	1	1
Type_1_diabetes	rs12708716-G	rs71388704	chr16	11181756	0.0898	none	CLEC16A	none	NA	Th2	0	1	0	0	0	0	0	1	1	1	1	1	1	1	1	1	1	0	1	1	1	1	1	1	1	0	1	0	0	1	0	1	0
Type_1_diabetes	rs12708716-G	rs725613	chr16	11169683	0.0773	none	CLEC16A	none	NA	Th2	0	0	0	0	0	0	0	0	1	1	1	1	1	1	1	1	1	0	1	1	1	0	1	1	1	0	1	0	0	1	0	1	0
Type_1_diabetes	rs12708716-G	rs11648679	chr16	11175984	0.0773	none	CLEC16A	none	NA	Th2	1	1	1	0	1	0	0	1	0	1	1	0	1	1	1	0	0	1	1	1	1	1	0	0	0	1	1	1	0	1	0	1	0
Type_1_diabetes	rs12708716-G	rs7184615	chr16	11165542	0.0529	none	CLEC16A	none	NA	Th2	0	0	0	0	0	0	0	0	1	1	1	0	1	1	1	0	1	0	1	1	0	0	1	0	0	0	1	0	0	1	0	0	0
Type_1_diabetes	rs12444268-A	rs12444268	chr16	20342572	0.9786	none	none	none	NA	none	0	0	0	0	0	0	0	0	0	0	0	0	0	0	0	0	0	0	0	0	0	0	0	0	0	0	0	0	0	0	0	0	0
Type_1_diabetes	rs4788084-C	rs4788084	chr16	28539848	0.0664	none	NPIPL1	none	NA	Liver1	0	1	0	0	1	0	0	1	1	1	1	0	1	0	0	0	0	0	0	0	0	0	0	1	1	1	1	1	1	1	0	0	0
Type_1_diabetes	rs4788084-C	rs2106480	chr16	28537971	0.0664	none	NPIPL1	none	NA	Liver1	0	0	0	0	0	0	1	1	0	0	0	0	0	0	0	0	0	0	1	0	1	1	0	1	1	1	1	1	1	1	0	0	0
Type_1_diabetes	rs4788084-C	rs8046271	chr16	28541394	0.0664	none	NPIPL1	none	NA	none	0	0	0	0	0	0	0	0	0	0	0	0	0	0	0	0	0	0	0	0	0	0	0	0	0	0	0	0	0	0	0	0	0
Type_1_diabetes	rs4788084-C	rs153106	chr16	28526897	0.0416	none	NPIPL1	none	NA	none	0	0	0	0	0	0	0	0	0	0	0	0	0	0	0	0	0	0	0	0	0	0	0	0	0	0	0	0	0	0	0	0	0
Type_1_diabetes	rs4788084-C	rs240702	chr16	28531353	0.0416	none	NPIPL1	none	NA	none	0	0	0	0	0	0	0	0	0	0	0	0	0	0	0	0	0	0	0	0	0	0	0	0	0	0	0	0	0	0	0	0	0
Type_1_diabetes	rs4788084-C	rs62034319	chr16	28532188	0.0416	none	NPIPL1	none	NA	none	0	0	0	0	0	0	0	0	0	0	0	0	0	0	0	0	0	0	0	0	0	0	0	0	0	0	0	0	0	0	0	0	0
Type_1_diabetes	rs4788084-C	rs28698667	chr16	28533071	0.0416	none	NPIPL1	none	NA	none	0	0	0	0	0	0	0	0	0	0	0	0	0	0	0	0	0	0	0	0	0	0	0	0	0	0	0	0	0	0	0	0	0
Type_1_diabetes	rs4788084-C	rs4788085	chr16	28535003	0.0416	none	NPIPL1	none	NA	Liver1	0	0	0	0	0	0	0	1	1	0	1	1	1	1	1	0	1	1	0	1	1	1	1	0	1	1	1	1	1	1	0	0	0
Type_1_diabetes	rs4788084-C	rs28772958	chr16	28535305	0.0416	none	NPIPL1	none	NA	Liver1	0	0	0	0	0	0	0	1	1	0	1	1	1	1	1	0	1	1	0	1	1	1	1	0	1	1	1	1	1	1	0	0	0
Type_1_diabetes	rs4788084-C	rs62034323	chr16	28536473	0.0416	none	NPIPL1	none	NA	Liver1	0	0	0	0	0	0	0	1	1	1	1	1	1	1	1	0	1	1	0	1	1	1	1	1	0	1	1	1	0	1	0	0	1
Type_1_diabetes	rs4788084-C	rs12446550	chr16	28543381	0.0416	none	NPIPL1	none	NA	Liver1	0	1	1	0	1	1	1	1	1	1	0	1	0	0	1	0	1	1	1	1	0	0	1	1	1	1	1	1	0	1	1	0	1
Type_1_diabetes	rs4788084-C	rs4788083	chr16	28545449	0.0416	none	NPIPL1	none	NA	adult_CD14	0	0	0	1	1	1	1	1	1	1	1	1	1	1	1	1	1	1	0	0	0	1	0	1	1	1	1	1	0	0	1	0	1
Type_1_diabetes	rs4788084-C	rs240704	chr16	28529949	0.0341	none	NPIPL1	none	NA	none	0	0	0	0	0	0	0	0	0	0	0	0	0	0	0	0	0	0	0	0	0	0	0	0	0	0	0	0	0	0	0	0	0
Type_1_diabetes	rs4788084-C	rs62034321	chr16	28534038	0.0341	none	NPIPL1	none	NA	none	0	0	0	0	0	0	0	0	0	0	0	0	0	0	0	0	0	0	0	0	0	0	0	0	0	0	0	0	0	0	0	0	0
Type_1_diabetes	rs4788084-C	rs62034326	chr16	28539293	0.0341	none	NPIPL1	none	NA	Liver1	0	1	0	0	1	0	0	1	1	1	1	0	1	0	0	0	0	0	0	0	0	0	0	1	1	1	1	1	1	1	0	0	0
Type_1_diabetes	rs4788084-C	rs62034324	chr16	28536762	0.0293	none	NPIPL1	none	NA	Liver1	0	0	0	0	0	0	0	1	1	1	1	1	1	1	1	0	1	1	0	1	1	1	1	1	0	1	1	1	0	1	0	0	1
Type_1_diabetes	rs7202877-G	rs7202877	chr16	75247245	0.041	none	none	none	NA	none	0	0	0	0	0	0	0	0	0	0	0	0	0	0	0	0	0	0	0	0	0	0	0	0	0	0	0	0	0	0	0	0	0
Type_1_diabetes	rs7202877-G	rs9940370	chr16	75246885	0.041	none	none	none	NA	none	0	0	0	0	0	0	0	0	0	0	0	0	0	0	0	0	0	0	0	0	0	0	0	0	0	0	0	0	0	0	0	0	0
Type_1_diabetes	rs7202877-G	rs66535165	chr16	75247083	0.041	none	none	none	NA	none	0	0	0	0	0	0	0	0	0	0	0	0	0	0	0	0	0	0	0	0	0	0	0	0	0	0	0	0	0	0	0	0	0
Type_1_diabetes	rs7202877-G	rs67478528	chr16	75247167	0.041	none	none	none	NA	none	0	0	0	0	0	0	0	0	0	0	0	0	0	0	0	0	0	0	0	0	0	0	0	0	0	0	0	0	0	0	0	0	0
Type_1_diabetes	rs7202877-G	rs11317724	chr16	75247337	0.041	none	none	none	NA	none	0	0	0	0	0	0	0	0	0	0	0	0	0	0	0	0	0	0	0	0	0	0	0	0	0	0	0	0	0	0	0	0	0
Type_1_diabetes	rs7202877-G	rs7202844	chr16	75247391	0.041	none	none	none	NA	none	0	0	0	0	0	0	0	0	0	0	0	0	0	0	0	0	0	0	0	0	0	0	0	0	0	0	0	0	0	0	0	0	0
Type_1_diabetes	rs7202877-G	rs6564232	chr16	75247826	0.041	none	none	none	NA	none	0	0	0	0	0	0	0	0	0	0	0	0	0	0	0	0	0	0	0	0	0	0	0	0	0	0	0	0	0	0	0	0	0
Type_1_diabetes	rs7202877-G	rs6564233	chr16	75248282	0.041	none	none	none	NA	none	0	0	0	0	0	0	0	0	0	0	0	0	0	0	0	0	0	0	0	0	0	0	0	0	0	0	0	0	0	0	0	0	0
Type_1_diabetes	rs7202877-G	rs7197746	chr16	75248380	0.041	none	none	none	NA	none	0	0	0	0	0	0	0	0	0	0	0	0	0	0	0	0	0	0	0	0	0	0	0	0	0	0	0	0	0	0	0	0	0
Type_1_diabetes	rs7202877-G	rs7197389	chr16	75248499	0.041	none	none	none	NA	none	0	0	0	0	0	0	0	0	0	0	0	0	0	0	0	0	0	0	0	0	0	0	0	0	0	0	0	0	0	0	0	0	0
Type_1_diabetes	rs7202877-G	rs60470336	chr16	75248570	0.041	none	none	none	NA	none	0	0	0	0	0	0	0	0	0	0	0	0	0	0	0	0	0	0	0	0	0	0	0	0	0	0	0	0	0	0	0	0	0
Type_1_diabetes	rs7202877-G	rs72802372	chr16	75248662	0.041	none	none	none	NA	none	0	0	0	0	0	0	0	0	0	0	0	0	0	0	0	0	0	0	0	0	0	0	0	0	0	0	0	0	0	0	0	0	0
Type_1_diabetes	rs7202877-G	rs66881382	chr16	75248761	0.041	none	none	none	NA	none	0	0	0	0	0	0	0	0	0	0	0	0	0	0	0	0	0	0	0	0	0	0	0	0	0	0	0	0	0	0	0	0	0
Type_1_diabetes	rs7202877-G	rs72802375	chr16	75248793	0.041	none	none	none	NA	none	0	0	0	0	0	0	0	0	0	0	0	0	0	0	0	0	0	0	0	0	0	0	0	0	0	0	0	0	0	0	0	0	0
Type_1_diabetes	rs7202877-G	rs61634868	chr16	75249273	0.041	none	none	none	NA	none	0	0	0	0	0	0	0	0	0	0	0	0	0	0	0	0	0	0	0	0	0	0	0	0	0	0	0	0	0	0	0	0	0
Type_1_diabetes	rs7202877-G	rs6564234	chr16	75249687	0.041	none	none	none	NA	none	0	0	0	0	0	0	0	0	0	0	0	0	0	0	0	0	0	0	0	0	0	0	0	0	0	0	0	0	0	0	0	0	0
Type_1_diabetes	rs7202877-G	rs6564236	chr16	75249891	0.041	none	none	none	NA	none	0	0	0	0	0	0	0	0	0	0	0	0	0	0	0	0	0	0	0	0	0	0	0	0	0	0	0	0	0	0	0	0	0
Type_1_diabetes	rs7202877-G	rs6564237	chr16	75249979	0.041	none	none	none	NA	none	0	0	0	0	0	0	0	0	0	0	0	0	0	0	0	0	0	0	0	0	0	0	0	0	0	0	0	0	0	0	0	0	0
Type_1_diabetes	rs7202877-G	rs2870463	chr16	75250717	0.041	none	none	none	NA	Pancreatic_Islets	1	1	0	0	0	1	1	0	0	0	0	1	0	1	0	1	0	0	0	0	1	0	1	1	0	1	0	0	1	0	0	0	0
Type_1_diabetes	rs7202877-G	rs66473537	chr16	75250862	0.041	none	none	none	NA	Pancreatic_Islets	1	1	0	0	0	1	1	0	0	0	0	1	0	1	0	1	0	0	0	0	1	0	1	1	0	1	0	0	1	0	0	0	0
Type_1_diabetes	rs7202877-G	rs8053595	chr16	75252103	0.041	none	none	none	NA	Pancreatic_Islets	1	1	0	1	1	1	1	1	1	1	0	0	1	1	1	0	0	0	0	1	1	0	1	0	0	0	0	0	1	1	1	0	0
Type_1_diabetes	rs7202877-G	rs8054218	chr16	75252161	0.041	none	none	none	NA	Pancreatic_Islets	1	1	0	1	1	1	1	1	1	1	0	0	1	1	1	0	0	0	0	1	1	0	1	0	0	0	0	0	1	1	1	0	0
Type_1_diabetes	rs16956936	rs16956936	chr17	7633692	0.1301	none	DNAH2	none	NA	none	0	0	0	0	0	0	0	0	0	0	0	0	0	0	0	0	0	0	0	0	0	0	0	0	0	0	0	0	0	0	0	0	0
Type_1_diabetes	rs16956936	rs62062609	chr17	7631694	0.1301	none	DNAH2	none	NA	none	0	0	0	0	0	0	0	0	0	0	0	0	0	0	0	0	0	0	0	0	0	0	0	0	0	0	0	0	0	0	0	0	0
Type_1_diabetes	rs16956936	rs62062611	chr17	7634055	0.1301	none	DNAH2	none	NA	none	0	0	0	0	0	0	0	0	0	0	0	0	0	0	0	0	0	0	0	0	0	0	0	0	0	0	0	0	0	0	0	0	0
Type_1_diabetes	rs16956936	rs16956939	chr17	7635815	0.1301	none	DNAH2	none	NA	none	0	0	0	0	0	0	0	0	0	0	0	0	0	0	0	0	0	0	0	0	0	0	0	0	0	0	0	0	0	0	0	0	0
Type_1_diabetes	rs16956936	rs112008397	chr17	7636959	0.1301	none	DNAH2	none	NA	none	0	0	0	0	0	0	0	0	0	0	0	0	0	0	0	0	0	0	0	0	0	0	0	0	0	0	0	0	0	0	0	0	0
Type_1_diabetes	rs16956936	rs62062613	chr17	7642035	0.0816	none	DNAH2	none	NA	none	0	0	0	0	0	0	0	0	0	0	0	0	0	0	0	0	0	0	0	0	0	0	0	0	0	0	0	0	0	0	0	0	0
Type_1_diabetes	rs16956936	rs150748195	chr17	7640300	0.0814	none	DNAH2	none	NA	none	0	0	0	0	0	0	0	0	0	0	0	0	0	0	0	0	0	0	0	0	0	0	0	0	0	0	0	0	0	0	0	0	0
Type_1_diabetes	rs16956936	rs62062610	chr17	7633766	0.067	none	DNAH2	none	NA	none	0	0	0	0	0	0	0	0	0	0	0	0	0	0	0	0	0	0	0	0	0	0	0	0	0	0	0	0	0	0	0	0	0
Type_1_diabetes	rs16956936	rs62062612	chr17	7635265	0.0666	none	DNAH2	none	NA	none	0	0	0	0	0	0	0	0	0	0	0	0	0	0	0	0	0	0	0	0	0	0	0	0	0	0	0	0	0	0	0	0	0
Type_1_diabetes	rs2290400	rs2290400	chr17	38066240	0.1654	none	GSDMB	none	NA	none	0	0	0	0	0	0	0	0	0	0	0	0	0	0	0	0	0	0	0	0	0	0	0	0	0	0	0	0	0	0	0	0	0
Type_1_diabetes	rs2290400	rs56380902	chr17	38066372	0.088	none	GSDMB	none	NA	none	0	0	0	0	0	0	0	0	0	0	0	0	0	0	0	0	0	0	0	0	0	0	0	0	0	0	0	0	0	0	0	0	0
Type_1_diabetes	rs2290400	rs1008723	chr17	38066267	0.045	none	GSDMB	none	NA	none	0	0	0	0	0	0	0	0	0	0	0	0	0	0	0	0	0	0	0	0	0	0	0	0	0	0	0	0	0	0	0	0	0
Type_1_diabetes	rs2290400	rs7216558	chr17	38070071	0.0377	none	GSDMB	none	NA	Liver1	0	0	0	0	0	0	0	0	0	1	0	0	1	1	1	1	0	0	0	1	1	0	1	1	1	1	1	1	0	0	0	1	0
Type_1_diabetes	rs7221109	rs7221109	chr17	38770286	0.2395	none	none	none	NA	CD25-_CD45RA+_naive	1	1	1	1	0	1	1	1	1	1	1	1	1	1	1	1	1	0	1	1	1	1	0	1	0	0	1	1	0	1	0	0	0
Type_1_diabetes	rs7221109	rs7223136	chr17	38765515	0.0908	none	none	none	NA	CD25-_CD45RA+_naive	0	0	0	0	0	0	0	1	1	1	1	1	1	1	1	1	1	0	1	0	1	0	0	1	0	0	0	0	0	1	0	0	0
Type_1_diabetes	rs7221109	rs4890117	chr17	38778488	0.0773	none	none	none	NA	CD45RA_CD8	0	0	0	0	0	0	0	1	1	1	1	1	1	1	1	1	1	1	1	1	0	0	0	1	0	1	0	1	0	1	0	0	0
Type_1_diabetes	rs7221109	rs1013971	chr17	38781178	0.0773	none	none	none	NA	B_Cell_Centroblast	0	1	0	1	0	0	0	1	1	1	1	1	1	1	1	1	1	0	1	1	1	0	0	0	0	0	1	0	0	0	0	0	0
Type_1_diabetes	rs7221109	rs201967149	chr17	38781829	0.0773	none	none	none	NA	none	0	0	0	0	0	0	0	0	0	0	0	0	0	0	0	0	0	0	0	0	0	0	0	0	0	0	0	0	0	0	0	0	0
Type_1_diabetes	rs7221109	rs757411	chr17	38775150	0.0723	none	none	SMARCE1	-	none	0	0	0	0	0	0	0	0	0	0	0	0	0	0	0	0	0	0	0	0	0	0	0	0	0	0	0	0	0	0	0	0	0
Type_1_diabetes	rs7221109	rs9911533	chr17	38775476	0.0723	none	none	SMARCE1	-	CD25-_IL17+_Th17_stim	1	0	0	1	0	0	0	1	1	1	1	1	1	1	1	1	1	0	1	1	1	0	1	1	0	0	1	1	0	0	0	0	0
Type_1_diabetes	rs7221109	rs7226035	chr17	38782286	0.0424	none	none	SMARCE1	-	none	0	0	0	0	0	0	0	0	0	0	0	0	0	0	0	0	0	0	0	0	0	0	0	0	0	0	0	0	0	0	0	0	0
Type_1_diabetes	rs7221109	rs11658582	chr17	38763200	0.0387	none	none	none	NA	CD25-_CD45RA+_naive	0	0	1	0	0	0	0	1	1	1	1	1	1	1	1	1	1	0	1	0	0	1	0	1	1	0	1	1	0	0	0	0	0
Type_1_diabetes	rs7221109	rs34099544	chr17	38782173	0.0378	none	none	none	NA	none	0	0	0	0	0	0	0	0	0	0	0	0	0	0	0	0	0	0	0	0	0	0	0	0	0	0	0	0	0	0	0	0	0
Type_1_diabetes	rs1893217	rs1893217	chr18	12809340	0.2348	none	PTPN2	none	NA	none	0	0	0	0	0	0	0	0	0	0	0	0	0	0	0	0	0	0	0	0	0	0	0	0	0	0	0	0	0	0	0	0	0
Type_1_diabetes	rs1893217	rs8096138	chr18	12808140	0.2348	none	PTPN2	none	NA	none	0	0	0	0	0	0	0	0	0	0	0	0	0	0	0	0	0	0	0	0	0	0	0	0	0	0	0	0	0	0	0	0	0
Type_1_diabetes	rs1893217	rs35153695	chr18	12808466	0.2348	none	PTPN2	none	NA	none	0	0	0	0	0	0	0	0	0	0	0	0	0	0	0	0	0	0	0	0	0	0	0	0	0	0	0	0	0	0	0	0	0
Type_1_diabetes	rs1893217	rs60474474	chr18	12792736	0.0347	utr3	PTPN2	none	NA	none	0	0	0	0	0	0	0	0	0	0	0	0	0	0	0	0	0	0	0	0	0	0	0	0	0	0	0	0	0	0	0	0	0
Type_1_diabetes	rs1893217	rs60751993	chr18	12795420	0.0347	none	PTPN2	none	NA	none	0	0	0	0	0	0	0	0	0	0	0	0	0	0	0	0	0	0	0	0	0	0	0	0	0	0	0	0	0	0	0	0	0
Type_1_diabetes	rs1893217	rs60735058	chr18	12795470	0.0347	none	PTPN2	none	NA	none	0	0	0	0	0	0	0	0	0	0	0	0	0	0	0	0	0	0	0	0	0	0	0	0	0	0	0	0	0	0	0	0	0
Type_1_diabetes	rs763361-C	rs763361	chr18	67531642	0.0692	missense	CD226	DOK6	-	none	0	0	0	0	0	0	0	0	0	0	0	0	0	0	0	0	0	0	0	0	0	0	0	0	0	0	0	0	0	0	0	0	0
Type_1_diabetes	rs763361-C	rs1788105	chr18	67532292	0.0692	none	CD226	DOK6	-	GM12878	0	0	0	0	0	0	0	0	1	1	1	1	1	1	0	1	0	0	0	1	1	0	0	0	0	1	0	0	0	0	0	0	0
Type_1_diabetes	rs763361-C	rs35977166	chr18	67529964	0.0419	none	none	none	NA	none	0	0	0	0	0	0	0	0	0	0	0	0	0	0	0	0	0	0	0	0	0	0	0	0	0	0	0	0	0	0	0	0	0
Type_1_diabetes	rs763361-C	rs1790931	chr18	67531895	0.031	none	CD226	none	NA	GM12878	0	0	0	0	0	0	0	0	1	1	1	1	1	1	0	1	0	0	0	1	1	0	0	0	0	1	0	0	0	0	0	0	0
Type_1_diabetes	rs763361-C	rs1788229	chr18	67533961	0.031	none	CD226	none	NA	none	0	0	0	0	0	0	0	0	0	0	0	0	0	0	0	0	0	0	0	0	0	0	0	0	0	0	0	0	0	0	0	0	0
Type_1_diabetes	rs763361-C	rs1790947	chr18	67527760	0.0309	none	none	DOK6	-	none	0	0	0	0	0	0	0	0	0	0	0	0	0	0	0	0	0	0	0	0	0	0	0	0	0	0	0	0	0	0	0	0	0
Type_1_diabetes	rs763361-C	rs1790946	chr18	67528430	0.0309	none	none	DOK6	-	none	0	0	0	0	0	0	0	0	0	0	0	0	0	0	0	0	0	0	0	0	0	0	0	0	0	0	0	0	0	0	0	0	0
Type_1_diabetes	rs763361-C	rs1615504	chr18	67526644	0.0285	none	none	DOK6	-	HepG2	0	0	0	0	0	0	0	0	1	1	0	1	0	1	1	1	0	0	0	0	0	0	0	0	0	0	1	0	0	0	0	0	0
Type_1_diabetes	rs763361-C	rs1788232	chr18	67527609	0.0285	none	none	DOK6	-	none	0	0	0	0	0	0	0	0	0	0	0	0	0	0	0	0	0	0	0	0	0	0	0	0	0	0	0	0	0	0	0	0	0
Type_1_diabetes	rs763361-C	rs1788098	chr18	67542798	0.0285	none	CD226	none	NA	none	0	0	0	0	0	0	0	0	0	0	0	0	0	0	0	0	0	0	0	0	0	0	0	0	0	0	0	0	0	0	0	0	0
Type_1_diabetes	rs2304256	rs2304256	chr19	10475652	0.4098	missense	TYK2	none	NA	substantia_nigra	1	1	1	1	1	1	1	0	0	0	1	1	0	1	0	0	0	1	0	1	0	0	1	0	0	0	0	1	1	0	0	0	0
Type_1_diabetes	rs2304256	rs34725611	chr19	10477067	0.2726	none	TYK2	none	NA	none	0	0	0	0	0	0	0	0	0	0	0	0	0	0	0	0	0	0	0	0	0	0	0	0	0	0	0	0	0	0	0	0	0
Type_1_diabetes	rs2304256	rs35251378	chr19	10459969	0.1249	none	none	none	NA	Pancreatic_Islets	0	0	0	0	0	0	0	0	0	1	0	0	1	0	0	1	1	0	0	0	1	1	0	0	0	0	0	0	1	0	0	0	0
Type_1_diabetes	rs2304256	rs11085727	chr19	10466123	0.0989	none	TYK2	none	NA	none	0	0	0	0	0	0	0	0	0	0	0	0	0	0	0	0	0	0	0	0	0	0	0	0	0	0	0	0	0	0	0	0	0
Type_1_diabetes	rs2304256	rs11085725	chr19	10462513	0.0927	none	TYK2	none	NA	Pancreatic_Islets	0	0	0	0	0	0	0	0	1	1	1	0	0	0	1	0	1	0	0	0	0	1	0	0	1	0	0	1	1	1	0	0	0
Type_1_diabetes	rs425105	rs425105	chr19	47208481	0.3317	none	PRKD2	PRKD2	-	CD25-_CD45RA+_naive	0	1	0	0	0	0	1	1	1	1	1	1	1	1	1	1	1	1	1	1	1	1	0	0	0	1	0	0	1	1	0	0	0
Type_1_diabetes	rs425105	rs60652743	chr19	47205707	0.3317	none	PRKD2	PRKD2	-	none	0	0	0	0	0	0	0	0	0	0	0	0	0	0	0	0	0	0	0	0	0	0	0	0	0	0	0	0	0	0	0	0	0
Type_1_diabetes	rs425105	rs402072	chr19	47219122	0.0662	none	PRKD2	PRKD2	-	CD25-_CD45RA+_naive	1	1	1	1	1	1	1	1	1	1	1	1	1	1	1	1	1	1	1	1	1	1	1	1	1	1	1	1	1	1	0	1	1
Type_1_diabetes	rs425105	rs313839	chr19	47221557	0.0662	none	none	PRKD2	-	GM12878	1	1	1	1	1	1	1	1	1	1	1	1	1	1	1	1	1	1	1	1	1	1	1	1	1	1	1	1	1	1	1	1	1
Type_1_diabetes	rs425105	rs113374757	chr19	47256542	0.0596	none	FKRP	PRKD2	-	B_Cell_Centroblast	0	1	1	1	0	1	1	1	1	1	0	1	1	1	1	1	1	0	1	1	1	1	0	1	0	0	0	0	1	1	0	1	0
Type_1_diabetes	rs425105	rs112445263	chr19	47203356	0.0314	none	PRKD2	none	NA	none	0	0	0	0	0	0	0	0	0	0	0	0	0	0	0	0	0	0	0	0	0	0	0	0	0	0	0	0	0	0	0	0	0
Type_1_diabetes	rs2281808	rs2281808	chr20	1610551	0.3124	none	SIRPG	none	NA	CD25-_CD45RA+_naive	0	0	0	0	0	0	0	1	1	1	1	1	1	1	1	1	1	0	0	0	0	0	0	0	0	0	0	0	0	0	0	0	0
Type_1_diabetes	rs2281808	rs3746722	chr20	1610939	0.2002	synonymous	SIRPG	none	NA	CD25-_CD45RA+_naive	0	0	0	0	0	0	0	1	1	1	1	1	1	1	1	1	1	0	0	0	0	0	0	0	0	0	0	0	0	0	0	0	0
Type_1_diabetes	rs2281808	rs2147337	chr20	1612282	0.1259	none	AK093519	none	NA	Th1	0	0	0	0	0	0	0	1	1	1	1	1	1	1	1	1	1	1	0	1	0	0	0	0	0	0	1	0	0	0	0	0	0
Type_1_diabetes	rs2281808	rs1535883	chr20	1612819	0.1259	none	AK093519	none	NA	Th1	1	1	0	0	0	0	0	1	1	1	1	1	1	1	1	1	1	0	1	1	0	0	0	1	0	0	1	0	0	0	0	0	0
Type_1_diabetes	rs2281808	rs2147336	chr20	1612279	0.1123	none	AK093519	none	NA	Th1	0	0	0	0	0	0	0	1	1	1	1	1	1	1	1	1	1	1	0	1	0	0	0	0	0	0	1	0	0	0	0	0	0
Type_1_diabetes	rs2281808	rs6043409	chr20	1616206	0.0646	missense	AK093519	none	NA	none	0	0	0	0	0	0	0	0	0	0	0	0	0	0	0	0	0	0	0	0	0	0	0	0	0	0	0	0	0	0	0	0	0
Type_1_diabetes	rs11203203	rs11203203	chr21	43836186	0.6061	none	UBASH3A	none	NA	GM12878	0	0	0	0	0	0	0	1	1	1	1	1	1	1	1	1	1	0	0	1	0	1	0	1	1	0	0	0	0	0	0	0	0
Type_1_diabetes	rs11203203	rs80054410	chr21	43836010	0.2502	none	UBASH3A	none	NA	GM12878	0	0	0	0	0	0	0	1	1	1	1	1	1	1	1	1	1	0	0	1	0	1	0	1	1	0	0	0	0	0	0	0	0
Type_1_diabetes	rs5753037-T	rs5753037	chr22	30581722	0.3025	none	none	none	NA	Th1	0	0	0	0	0	0	0	0	1	1	1	1	1	1	1	1	1	0	0	0	0	0	0	1	1	0	0	0	1	1	1	1	0
Type_1_diabetes	rs5753037-T	rs73164755	chr22	30590015	0.1229	none	none	none	NA	NH-Osteoblast	0	1	0	0	0	0	0	1	0	0	1	1	1	1	1	0	1	1	0	1	0	0	1	1	1	0	1	1	0	1	1	1	1
Type_1_diabetes	rs5753037-T	rs1548389	chr22	30573552	0.0928	none	none	none	NA	Th1	0	0	0	0	0	0	0	0	1	0	1	1	1	1	1	0	0	0	0	1	0	1	0	0	0	0	0	0	0	0	0	1	0
Type_1_diabetes	rs5753037-T	rs1807711	chr22	30591169	0.0734	none	none	none	NA	NH-Osteoblast	1	1	1	1	1	1	1	1	1	1	1	1	1	1	1	1	1	1	0	1	1	1	1	1	1	1	1	1	1	1	1	1	1
Type_1_diabetes	rs5753037-T	rs2412976	chr22	30567907	0.0403	none	HORMAD2	none	NA	none	0	0	0	0	0	0	0	0	0	0	0	0	0	0	0	0	0	0	0	0	0	0	0	0	0	0	0	0	0	0	0	0	0
Type_1_diabetes	rs5753037-T	rs5763842	chr22	30568738	0.0403	none	HORMAD2	none	NA	none	0	0	0	0	0	0	0	0	0	0	0	0	0	0	0	0	0	0	0	0	0	0	0	0	0	0	0	0	0	0	0	0	0
Type_1_diabetes	rs5753037-T	rs5753025	chr22	30542157	0.0336	none	HORMAD2	none	NA	none	0	0	0	0	0	0	0	0	0	0	0	0	0	0	0	0	0	0	0	0	0	0	0	0	0	0	0	0	0	0	0	0	0
Type_1_diabetes	rs5753037-T	rs1468176	chr22	30544516	0.0336	none	HORMAD2	none	NA	none	0	0	0	0	0	0	0	0	0	0	0	0	0	0	0	0	0	0	0	0	0	0	0	0	0	0	0	0	0	0	0	0	0
Type_1_diabetes	rs5753037-T	rs4336042	chr22	30552511	0.0308	none	HORMAD2	none	NA	none	0	0	0	0	0	0	0	0	0	0	0	0	0	0	0	0	0	0	0	0	0	0	0	0	0	0	0	0	0	0	0	0	0
Type_1_diabetes	rs5753037-T	rs4820830	chr22	30531091	0.0282	none	HORMAD2	none	NA	none	0	0	0	0	0	0	0	0	0	0	0	0	0	0	0	0	0	0	0	0	0	0	0	0	0	0	0	0	0	0	0	0	0
Type_1_diabetes	rs5753037-T	rs2899147	chr22	30533065	0.0282	none	HORMAD2	none	NA	none	0	0	0	0	0	0	0	0	0	0	0	0	0	0	0	0	0	0	0	0	0	0	0	0	0	0	0	0	0	0	0	0	0
Type_1_diabetes	rs229541	rs229541	chr22	37591318	0.1349	none	C1QTNF6	none	NA	CD25+_CD127-_Treg	1	1	0	1	1	1	1	1	1	1	1	1	1	1	1	1	1	1	1	1	0	1	0	1	1	1	1	1	1	1	1	0	0
Type_1_diabetes	rs229541	rs229540	chr22	37591290	0.1349	none	C1QTNF6	none	NA	CD25+_CD127-_Treg	1	1	0	1	1	1	1	1	1	1	1	1	1	1	1	1	1	1	1	1	0	1	0	1	1	1	1	1	1	1	1	0	0
Type_1_diabetes	rs229541	rs229542	chr22	37592106	0.1349	none	C1QTNF6	none	NA	AdiposeNuclei	1	1	1	1	1	1	1	1	1	1	1	1	1	1	1	1	1	0	0	1	1	0	1	1	1	1	1	1	1	1	1	0	0
Type_1_diabetes	rs229541	rs5845323	chr22	37583732	0.0819	none	C1QTNF6	none	NA	kidney	1	1	1	1	1	1	1	1	1	1	1	1	1	1	1	1	1	0	1	1	0	1	0	1	1	1	0	1	1	1	1	1	1
Type_1_diabetes	rs229541	rs229531	chr22	37585736	0.0819	none	C1QTNF6	none	NA	kidney	1	1	1	1	1	1	1	0	1	1	1	0	1	1	1	1	1	0	1	1	0	1	1	1	1	1	0	1	1	1	0	1	1
Type_1_diabetes	rs229541	rs2858483	chr22	37586672	0.0819	none	C1QTNF6	none	NA	kidney	0	0	0	1	0	0	0	1	0	0	1	0	0	0	1	1	1	0	1	0	0	0	1	1	1	1	0	1	0	1	0	1	0
Type_1_diabetes	rs229541	rs2858484	chr22	37586676	0.0819	none	C1QTNF6	none	NA	kidney	0	0	0	1	0	0	0	1	0	0	1	0	0	0	1	1	1	0	1	0	0	0	1	1	1	1	0	1	0	1	0	1	0
Type_1_diabetes	rs229541	rs229533	chr22	37587111	0.0819	none	C1QTNF6	none	NA	none	0	0	0	0	0	0	0	0	0	0	0	0	0	0	0	0	0	0	0	0	0	0	0	0	0	0	0	0	0	0	0	0	0
Type_1_diabetes	rs229541	rs229536	chr22	37589869	0.0819	none	C1QTNF6	none	NA	Th1	1	1	1	1	1	1	1	1	1	1	1	1	1	1	1	1	1	0	1	1	0	1	1	1	1	1	1	1	1	1	0	1	0
Type_1_diabetes	rs229541	rs229528	chr22	37581677	0.0729	none	C1QTNF6	none	NA	CD25+_CD127-_Treg	0	0	0	0	0	0	1	1	1	1	1	0	1	1	1	0	1	0	0	0	0	1	0	0	0	1	0	1	0	1	0	0	0
Autoimmune_thyroiditis	rs2476601	rs2476601	chr1	114377568	0.6895	missense	PTPN22	none	NA	none	0	0	0	0	0	0	0	0	0	0	0	0	0	0	0	0	0	0	0	0	0	0	0	0	0	0	0	0	0	0	0	0	0
Autoimmune_thyroiditis	rs2476601	rs6679677	chr1	114303808	0.3105	none	none	none	NA	Mobilized_CD34	1	0	1	1	0	0	0	1	1	1	1	1	0	1	0	1	1	1	1	0	0	1	1	0	0	1	1	0	1	0	0	1	1
Autoimmune_thyroiditis	rs11571297	rs11571297	chr2	204745003	0.3407	none	none	none	NA	Th1	0	0	0	0	1	1	0	0	1	1	1	1	1	1	1	0	0	1	0	0	0	0	0	0	0	0	0	1	0	1	0	0	0
Autoimmune_thyroiditis	rs11571297	rs3087243	chr2	204738919	0.1299	none	none	none	NA	CD25+_CD127-_Treg	0	0	0	0	0	0	0	1	1	1	1	1	1	1	1	0	0	0	0	0	0	0	0	0	0	0	0	0	0	0	0	0	0
Autoimmune_thyroiditis	rs11571297	rs11571302	chr2	204742934	0.0411	none	none	none	NA	CD25+_CD127-_Treg	0	0	1	0	0	0	0	1	1	1	1	1	1	1	1	0	1	1	0	0	1	0	0	0	0	0	0	0	0	0	0	0	0
Autoimmune_thyroiditis	rs11571297	rs1863800	chr2	204702660	0.0366	none	none	none	NA	Th1	0	0	0	0	0	0	0	0	1	1	1	1	1	1	1	0	0	0	0	0	0	0	0	0	0	0	0	0	0	0	0	0	0
Autoimmune_thyroiditis	rs11571297	rs231811	chr2	204713891	0.0348	none	none	none	NA	CD25-_IL17+_Th17_stim	0	0	0	0	0	0	0	0	0	1	1	1	1	1	1	1	0	0	0	0	0	0	0	0	0	1	0	0	0	0	0	0	0
Autoimmune_thyroiditis	rs11571297	rs231804	chr2	204708646	0.0287	none	none	none	NA	Th1	0	0	0	0	0	0	0	0	0	1	1	1	1	1	0	1	0	1	0	0	0	0	0	0	0	1	0	0	0	0	0	0	0
Autoimmune_thyroiditis	rs11571297	rs231806	chr2	204709349	0.0283	none	none	none	NA	none	0	0	0	0	0	0	0	0	0	0	0	0	0	0	0	0	0	0	0	0	0	0	0	0	0	0	0	0	0	0	0	0	0
Autoimmune_thyroiditis	rs13093110-C	rs13093110	chr3	188125120	0.1249	none	LPP	none	NA	none	0	0	0	0	0	0	0	0	0	0	0	0	0	0	0	0	0	0	0	0	0	0	0	0	0	0	0	0	0	0	0	0	0
Autoimmune_thyroiditis	rs13093110-C	rs715199	chr3	188126536	0.077	none	LPP	none	NA	none	0	0	0	0	0	0	0	0	0	0	0	0	0	0	0	0	0	0	0	0	0	0	0	0	0	0	0	0	0	0	0	0	0
Autoimmune_thyroiditis	rs13093110-C	rs13098877	chr3	188133163	0.0533	none	LPP	none	NA	B_Cell_Centroblast	0	0	0	0	0	0	0	0	0	0	0	0	1	0	0	0	0	0	0	0	1	0	0	0	0	0	0	0	0	0	0	1	1
Autoimmune_thyroiditis	rs13093110-C	rs12634152	chr3	188121019	0.0433	none	LPP	none	NA	none	0	0	0	0	0	0	0	0	0	0	0	0	0	0	0	0	0	0	0	0	0	0	0	0	0	0	0	0	0	0	0	0	0
Autoimmune_thyroiditis	rs13093110-C	rs6778720	chr3	188118877	0.0278	none	LPP	none	NA	adult_CD20	1	1	1	1	1	1	1	1	1	0	1	1	1	1	1	1	1	1	1	1	1	1	0	1	1	1	1	1	1	1	1	1	1
Autoimmune_thyroiditis	rs13093110-C	rs2030520	chr3	188119582	0.0275	none	LPP	none	NA	adult_CD20	0	1	0	0	1	0	0	0	1	0	1	0	1	1	1	1	1	1	1	0	1	0	0	0	1	1	1	1	0	1	0	0	1
Autoimmune_thyroiditis	rs72928038-G	rs72928038	chr6	90976768	0.5974	none	BACH2	none	NA	CD25-_CD45RA+_naive	0	0	0	0	0	0	0	1	1	1	1	1	1	1	1	1	1	0	1	0	1	0	0	1	0	0	0	0	0	0	1	0	0
Autoimmune_thyroiditis	rs72928038-G	rs6908626	chr6	91005743	0.0526	none	BACH2	none	NA	CD25-_CD45RA+_naive	1	1	1	1	1	1	1	1	1	1	1	1	1	1	1	1	1	0	1	1	1	1	1	1	1	1	0	1	1	1	1	0	1
Autoimmune_thyroiditis	rs72928038-G	rs10944479	chr6	90880393	0.0402	none	BACH2	none	NA	adult_CD20	0	0	0	0	0	0	0	1	0	1	1	1	1	1	0	1	0	0	1	0	1	0	0	0	0	0	0	0	0	0	1	0	0
Autoimmune_thyroiditis	rs72928038-G	rs673780	chr6	90960329	0.0287	none	BACH2	none	NA	CD25-_IL17-_Th_stim_MACS	0	0	0	0	0	0	0	1	1	1	1	1	1	1	1	1	0	0	1	0	1	0	0	0	0	0	0	0	0	0	0	0	1
Autoimmune_thyroiditis	rs4710149	rs4710149	chr6	167386346	0.0287	none	none	none	NA	none	0	0	0	0	0	0	0	0	0	0	0	0	0	0	0	0	0	0	0	0	0	0	0	0	0	0	0	0	0	0	0	0	0
Autoimmune_thyroiditis	rs706779	rs706779	chr10	6098824	0.624	none	IL2RA	none	NA	Th1	1	1	1	1	0	1	1	1	1	1	1	1	1	1	1	0	1	0	1	1	1	0	1	1	1	1	0	1	1	1	0	0	0
Autoimmune_thyroiditis	rs706779	rs2245675	chr10	6095577	0.0598	none	IL2RA	none	NA	CD25+_CD127-_Treg	1	1	1	1	0	1	1	1	1	1	1	1	1	1	1	0	1	1	1	1	1	1	1	1	1	1	1	1	1	1	0	0	0
Autoimmune_thyroiditis	rs706779	rs2476491	chr10	6095410	0.0587	none	IL2RA	none	NA	CD25+_CD127-_Treg	1	1	1	1	0	1	1	1	1	1	1	1	1	1	1	0	1	1	1	1	1	1	1	1	1	1	1	1	1	1	0	0	0
Autoimmune_thyroiditis	rs706779	rs61839660	chr10	6094697	0.0356	none	IL2RA	none	NA	CD25-_IL17-_Th_stim_MACS	1	1	1	1	1	1	1	1	1	1	1	1	1	1	1	1	1	1	1	1	1	1	0	1	1	1	0	1	0	1	0	0	0
Autoimmune_thyroiditis	rs706779	rs7090530	chr10	6110875	0.0295	none	none	none	NA	Th0	1	1	1	1	1	1	1	1	1	1	1	1	1	1	1	1	1	1	1	1	1	1	1	1	1	1	0	0	0	1	1	0	1
Autoimmune_thyroiditis	rs57348955-G	rs57348955	chr16	31185882	0.501	none	none	none	NA	none	0	0	0	0	0	0	0	0	0	0	0	0	0	0	0	0	0	0	0	0	0	0	0	0	0	0	0	0	0	0	0	0	0
Autoimmune_thyroiditis	rs57348955-G	rs11150608	chr16	31301125	0.0581	none	ITGAM	none	NA	B_Cell_Centroblast	0	0	0	0	0	0	0	0	1	1	1	0	0	0	0	1	0	1	1	0	1	0	0	0	0	0	0	0	0	0	0	0	0
Autoimmune_thyroiditis	rs57348955-G	rs7192161	chr16	31331958	0.0506	none	ITGAM	none	NA	none	0	0	0	0	0	0	0	0	0	0	0	0	0	0	0	0	0	0	0	0	0	0	0	0	0	0	0	0	0	0	0	0	0
Autoimmune_thyroiditis	rs57348955-G	rs11150610	chr16	31334236	0.0482	none	ITGAM	none	NA	none	0	0	0	0	0	0	0	0	0	0	0	0	0	0	0	0	0	0	0	0	0	0	0	0	0	0	0	0	0	0	0	0	0
Autoimmune_thyroiditis	rs57348955-G	rs10782004	chr16	31363417	0.0393	none	none	none	NA	adult_CD14	1	1	1	1	1	1	1	0	0	1	1	1	1	1	1	0	1	1	1	1	1	1	0	1	1	1	0	1	0	1	0	0	0
Autoimmune_thyroiditis	rs57348955-G	rs11574630	chr16	31363788	0.0378	none	none	none	NA	adult_CD14	1	1	1	1	1	1	1	0	0	1	1	1	1	1	1	0	0	1	1	1	1	1	0	1	1	1	0	1	0	1	0	0	0
Autoimmune_thyroiditis	rs57348955-G	rs11150612	chr16	31357760	0.033	none	none	none	NA	none	0	0	0	0	0	0	0	0	0	0	0	0	0	0	0	0	0	0	0	0	0	0	0	0	0	0	0	0	0	0	0	0	0
Autoimmune_thyroiditis	rs57348955-G	rs2230429	chr16	31374535	0.0327	missense	ITGAX	ITGAM	-	none	0	0	0	0	0	0	0	0	0	0	0	0	0	0	0	0	0	0	0	0	0	0	0	0	0	0	0	0	0	0	0	0	0
Autoimmune_thyroiditis	rs57348955-G	rs11150619	chr16	31376849	0.0319	none	ITGAX	ITGAM	-	CD45RO_CD8	0	0	0	1	0	0	1	1	0	0	1	1	0	1	1	1	1	1	1	1	1	1	0	0	0	0	0	1	0	0	0	0	0
Autoimmune_thyroiditis	rs57348955-G	rs41440449	chr16	31337677	0.0318	none	ITGAM	none	NA	none	0	0	0	0	0	0	0	0	0	0	0	0	0	0	0	0	0	0	0	0	0	0	0	0	0	0	0	0	0	0	0	0	0
Autoimmune_thyroiditis	rs57348955-G	rs28372932	chr16	31339625	0.0303	none	ITGAM	none	NA	none	0	0	0	0	0	0	0	0	0	0	0	0	0	0	0	0	0	0	0	0	0	0	0	0	0	0	0	0	0	0	0	0	0
Autoimmune_thyroiditis	rs57348955-G	rs9673398	chr16	31347519	0.03	none	none	none	NA	none	0	0	0	0	0	0	0	0	0	0	0	0	0	0	0	0	0	0	0	0	0	0	0	0	0	0	0	0	0	0	0	0	0
Autoimmune_thyroiditis	rs3761959	rs3761959	chr1	157669278	0.2199	none	FCRL3	FCRL3	-	adult_CD20	0	0	0	0	0	0	0	1	1	1	1	0	1	1	1	1	1	1	1	0	1	1	0	0	0	0	0	1	0	0	0	0	0
Autoimmune_thyroiditis	rs3761959	rs2210913	chr1	157668993	0.2199	none	FCRL3	FCRL3	-	adult_CD20	0	0	0	0	0	0	0	0	1	1	1	0	1	1	1	1	1	0	1	0	1	1	0	0	0	0	0	1	0	0	0	0	0
Autoimmune_thyroiditis	rs3761959	rs945635	chr1	157670290	0.2199	utr5	FCRL3	FCRL3	-	adult_CD20	0	0	0	0	0	0	0	0	1	1	1	0	1	1	1	1	1	0	1	0	1	1	0	1	1	0	0	1	0	0	0	0	0
Autoimmune_thyroiditis	rs3761959	rs7528684	chr1	157670816	0.2199	none	none	FCRL3	-	adult_CD20	0	0	0	0	0	0	0	0	1	1	1	0	1	1	1	1	1	0	1	0	1	1	0	1	1	0	0	1	0	0	0	0	0
Autoimmune_thyroiditis	rs6832151	rs6832151	chr4	40303633	0.5257	none	none	none	NA	B_Cell_Centroblast	0	0	0	0	0	0	0	1	1	1	1	1	1	1	1	1	1	1	1	1	1	1	0	1	1	0	0	1	1	1	1	0	0
Autoimmune_thyroiditis	rs6832151	rs11736377	chr4	40301264	0.2516	none	none	none	NA	B_Cell_Centroblast	0	0	0	0	0	0	0	1	1	1	1	1	1	1	1	1	1	1	1	1	1	1	1	0	0	0	0	1	0	0	1	0	0
Autoimmune_thyroiditis	rs6832151	rs4379091	chr4	40306373	0.1601	none	none	none	NA	B_Cell_Centroblast	0	0	0	0	0	0	0	1	1	1	1	1	1	1	1	1	1	0	1	1	1	1	0	1	1	0	0	0	0	0	0	0	0
Autoimmune_thyroiditis	rs12101261	rs12101261	chr14	81451229	0.274	none	TSHR	none	NA	none	0	0	0	0	0	0	0	0	0	0	0	0	0	0	0	0	0	0	0	0	0	0	0	0	0	0	0	0	0	0	0	0	0
Autoimmune_thyroiditis	rs12101261	rs12101255	chr14	81451052	0.274	none	TSHR	none	NA	none	0	0	0	0	0	0	0	0	0	0	0	0	0	0	0	0	0	0	0	0	0	0	0	0	0	0	0	0	0	0	0	0	0
Autoimmune_thyroiditis	rs12101261	rs17111346	chr14	81452172	0.274	none	TSHR	none	NA	none	0	0	0	0	0	0	0	0	0	0	0	0	0	0	0	0	0	0	0	0	0	0	0	0	0	0	0	0	0	0	0	0	0
Autoimmune_thyroiditis	rs12101261	rs8003061	chr14	81451956	0.1061	none	TSHR	none	NA	none	0	0	0	0	0	0	0	0	0	0	0	0	0	0	0	0	0	0	0	0	0	0	0	0	0	0	0	0	0	0	0	0	0
Rheumatoid_arthritis	rs28532547	rs28532547	chr1	2561286	0.0367	none	MMEL1	none	NA	none	0	0	0	0	0	0	0	0	0	0	0	0	0	0	0	0	0	0	0	0	0	0	0	0	0	0	0	0	0	0	0	0	0
Rheumatoid_arthritis	rs28532547	rs10797436	chr1	2538349	0.0367	none	MMEL1	none	NA	none	0	0	0	0	0	0	0	0	0	0	0	0	0	0	0	0	0	0	0	0	0	0	0	0	0	0	0	0	0	0	0	0	0
Rheumatoid_arthritis	rs28532547	rs10910106	chr1	2538886	0.0367	none	MMEL1	none	NA	none	0	0	0	0	0	0	0	0	0	0	0	0	0	0	0	0	0	0	0	0	0	0	0	0	0	0	0	0	0	0	0	0	0
Rheumatoid_arthritis	rs28532547	rs142350479	chr1	2539946	0.0367	none	MMEL1	none	NA	none	0	0	0	0	0	0	0	0	0	0	0	0	0	0	0	0	0	0	0	0	0	0	0	0	0	0	0	0	0	0	0	0	0
Rheumatoid_arthritis	rs28532547	rs7364820	chr1	2556709	0.0367	none	MMEL1	none	NA	none	0	0	0	0	0	0	0	0	0	0	0	0	0	0	0	0	0	0	0	0	0	0	0	0	0	0	0	0	0	0	0	0	0
Rheumatoid_arthritis	rs28532547	rs7523364	chr1	2557191	0.0367	none	MMEL1	none	NA	none	0	0	0	0	0	0	0	0	0	0	0	0	0	0	0	0	0	0	0	0	0	0	0	0	0	0	0	0	0	0	0	0	0
Rheumatoid_arthritis	rs28532547	rs4648659	chr1	2560903	0.0367	synonymous	MMEL1	none	NA	none	0	0	0	0	0	0	0	0	0	0	0	0	0	0	0	0	0	0	0	0	0	0	0	0	0	0	0	0	0	0	0	0	0
Rheumatoid_arthritis	rs28532547	rs4648564	chr1	2562169	0.0367	none	MMEL1	none	NA	none	0	0	0	0	0	0	0	0	0	0	0	0	0	0	0	0	0	0	0	0	0	0	0	0	0	0	0	0	0	0	0	0	0
Rheumatoid_arthritis	rs2240339	rs2240339	chr1	17674108	0.189	none	PADI4	none	NA	none	0	0	0	0	0	0	0	0	0	0	0	0	0	0	0	0	0	0	0	0	0	0	0	0	0	0	0	0	0	0	0	0	0
Rheumatoid_arthritis	rs2240339	rs2301888	chr1	17672730	0.1753	none	PADI4	none	NA	none	0	0	0	0	0	0	0	0	0	0	0	0	0	0	0	0	0	0	0	0	0	0	0	0	0	0	0	0	0	0	0	0	0
Rheumatoid_arthritis	rs2240339	rs2240335	chr1	17674537	0.0909	synonymous	PADI4	none	NA	K562	0	0	0	0	0	0	0	0	0	0	0	0	0	0	0	0	0	1	0	1	0	0	1	0	0	0	0	0	0	0	0	0	0
Rheumatoid_arthritis	rs2240339	rs2240338	chr1	17674185	0.0833	none	PADI4	none	NA	none	0	0	0	0	0	0	0	0	0	0	0	0	0	0	0	0	0	0	0	0	0	0	0	0	0	0	0	0	0	0	0	0	0
Rheumatoid_arthritis	rs2240339	rs1748038	chr1	17657123	0.063	none	PADI4	none	NA	none	0	0	0	0	0	0	0	0	0	0	0	0	0	0	0	0	0	0	0	0	0	0	0	0	0	0	0	0	0	0	0	0	0
Rheumatoid_arthritis	rs2240339	rs2240336	chr1	17674402	0.0578	none	PADI4	none	NA	K562	0	0	0	0	0	0	0	0	0	0	0	0	0	0	0	0	0	1	0	1	0	0	1	0	0	0	0	0	0	0	0	0	0
Rheumatoid_arthritis	rs2240339	rs1748041	chr1	17655407	0.0357	none	PADI4	none	NA	none	0	0	0	0	0	0	0	0	0	0	0	0	0	0	0	0	0	0	0	0	0	0	0	0	0	0	0	0	0	0	0	0	0
Rheumatoid_arthritis	rs2240339	rs1635594	chr1	17661805	0.0286	none	PADI4	none	NA	none	0	0	0	0	0	0	0	0	0	0	0	0	0	0	0	0	0	0	0	0	0	0	0	0	0	0	0	0	0	0	0	0	0
Rheumatoid_arthritis	rs2476601-A	rs2476601	chr1	114377568	0.6583	missense	PTPN22	none	NA	none	0	0	0	0	0	0	0	0	0	0	0	0	0	0	0	0	0	0	0	0	0	0	0	0	0	0	0	0	0	0	0	0	0
Rheumatoid_arthritis	rs2476601-A	rs6679677	chr1	114303808	0.3417	none	none	none	NA	Mobilized_CD34	1	0	1	1	0	0	0	1	1	1	1	1	0	1	0	1	1	1	1	0	0	1	1	0	0	1	1	0	1	0	0	1	1
Rheumatoid_arthritis	rs10209110-A	rs10209110	chr2	100672692	0.1185	none	AFF3	none	NA	adult_CD20	0	0	0	0	0	0	0	0	0	0	0	0	0	0	1	0	0	1	1	0	0	1	0	0	0	0	0	0	0	0	0	1	0
Rheumatoid_arthritis	rs10209110-A	rs11294819	chr2	100687335	0.0531	none	AFF3	none	NA	none	0	0	0	0	0	0	0	0	0	0	0	0	0	0	0	0	0	0	0	0	0	0	0	0	0	0	0	0	0	0	0	0	0
Rheumatoid_arthritis	rs10209110-A	rs11676922	chr2	100806940	0.0444	none	none	none	NA	none	0	0	0	0	0	0	0	0	0	0	0	0	0	0	0	0	0	0	0	0	0	0	0	0	0	0	0	0	0	0	0	0	0
Rheumatoid_arthritis	rs10209110-A	rs2576678	chr2	100704810	0.0395	none	AFF3	none	NA	none	0	0	0	0	0	0	0	0	0	0	0	0	0	0	0	0	0	0	0	0	0	0	0	0	0	0	0	0	0	0	0	0	0
Rheumatoid_arthritis	rs10209110-A	rs6712515	chr2	100806514	0.0322	none	none	none	NA	none	0	0	0	0	0	0	0	0	0	0	0	0	0	0	0	0	0	0	0	0	0	0	0	0	0	0	0	0	0	0	0	0	0
Rheumatoid_arthritis	rs10209110-A	rs11123811	chr2	100760172	0.032	none	none	none	NA	B_Cell_Centroblast	0	0	0	0	0	0	0	1	0	1	1	1	1	1	1	0	1	1	1	1	1	1	0	0	0	0	0	1	0	0	1	0	0
Rheumatoid_arthritis	rs10209110-A	rs7608424	chr2	100796543	0.0295	none	none	none	NA	none	0	0	0	0	0	0	0	0	0	0	0	0	0	0	0	0	0	0	0	0	0	0	0	0	0	0	0	0	0	0	0	0	0
Rheumatoid_arthritis	rs10209110-A	rs34548598	chr2	100653047	0.0292	none	AFF3	none	NA	none	0	0	0	0	0	0	0	0	0	0	0	0	0	0	0	0	0	0	0	0	0	0	0	0	0	0	0	0	0	0	0	0	0
Rheumatoid_arthritis	rs10209110-A	rs6733895	chr2	100666082	0.0292	none	AFF3	none	NA	none	0	0	0	0	0	0	0	0	0	0	0	0	0	0	0	0	0	0	0	0	0	0	0	0	0	0	0	0	0	0	0	0	0
Rheumatoid_arthritis	rs13426947-A	rs13426947	chr2	191933254	0.1804	none	STAT4	none	NA	CD25-_CD45RO+_mem	0	0	0	0	0	0	0	1	1	1	1	1	0	0	1	1	1	0	0	0	1	1	0	0	0	1	0	0	0	0	0	0	0
Rheumatoid_arthritis	rs13426947-A	rs3024859	chr2	191925424	0.1104	none	STAT4	none	NA	CD45RA_CD8	0	0	0	0	0	0	0	1	1	0	1	1	1	1	1	1	1	0	1	0	0	0	0	0	0	0	0	0	1	0	0	0	0
Rheumatoid_arthritis	rs13426947-A	rs7574865	chr2	191964633	0.0889	none	STAT4	none	NA	none	0	0	0	0	0	0	0	0	0	0	0	0	0	0	0	0	0	0	0	0	0	0	0	0	0	0	0	0	0	0	0	0	0
Rheumatoid_arthritis	rs13426947-A	rs10181656	chr2	191969879	0.0877	none	STAT4	none	NA	CD25-_IL17-_Th_stim_MACS	0	0	0	0	0	0	0	1	1	0	1	1	0	0	0	1	0	0	0	0	0	0	0	0	0	0	0	0	0	0	0	1	1
Rheumatoid_arthritis	rs13426947-A	rs10174238	chr2	191973034	0.0748	none	STAT4	none	NA	Th2	1	0	0	0	0	0	0	0	1	1	1	1	1	1	1	1	1	0	0	1	0	0	0	0	0	1	0	1	0	1	0	0	0
Rheumatoid_arthritis	rs13426947-A	rs8179673	chr2	191969341	0.0609	none	STAT4	none	NA	CD25-_IL17-_Th_stim_MACS	0	0	0	0	0	0	0	1	1	0	1	1	0	0	0	1	0	0	0	0	0	0	0	0	0	0	0	0	0	0	0	1	1
Rheumatoid_arthritis	rs13426947-A	rs35593987	chr2	191916526	0.0576	none	STAT4	none	NA	NH-Osteoblast	1	1	0	0	0	0	1	1	1	1	1	1	1	1	1	1	1	1	1	0	0	1	1	0	1	1	1	1	0	0	1	1	1
Rheumatoid_arthritis	rs13426947-A	rs12465689	chr2	191912540	0.0518	none	STAT4	none	NA	NH-Osteoblast	0	0	0	0	0	0	0	1	0	1	0	1	1	1	0	1	0	0	0	0	1	1	0	0	0	1	0	0	1	0	1	1	1
Rheumatoid_arthritis	rs13426947-A	rs11893432	chr2	191921874	0.0509	none	STAT4	none	NA	CD45RA_CD8	0	0	0	0	0	0	0	1	1	1	1	1	1	1	1	1	1	0	1	0	1	1	0	0	0	0	0	0	0	1	1	0	0
Rheumatoid_arthritis	rs13426947-A	rs3821236	chr2	191902758	0.0479	none	STAT4	none	NA	CD45RO_CD8	1	1	1	1	0	1	1	1	1	1	1	1	1	1	1	1	1	1	1	1	0	1	1	1	1	1	0	0	1	1	1	1	1
Rheumatoid_arthritis	rs13426947-A	rs11889341	chr2	191943742	0.0435	none	STAT4	none	NA	CD25-_IL17-_Th_stim_MACS	0	0	0	0	0	0	0	1	1	1	1	1	0	0	1	1	1	0	0	0	0	0	0	0	0	0	0	0	0	0	0	0	0
Rheumatoid_arthritis	rs13426947-A	rs7568275	chr2	191966452	0.0417	none	STAT4	none	NA	none	0	0	0	0	0	0	0	0	0	0	0	0	0	0	0	0	0	0	0	0	0	0	0	0	0	0	0	0	0	0	0	0	0
Rheumatoid_arthritis	rs13426947-A	rs3024886	chr2	191900449	0.0376	none	STAT4	none	NA	CD25-_IL17+_Th17_stim	0	0	0	0	0	0	0	1	1	0	1	1	0	0	0	1	1	1	0	1	0	1	0	0	0	0	1	1	0	0	0	0	0
Rheumatoid_arthritis	rs13426947-A	rs16833214	chr2	191913642	0.0374	none	STAT4	none	NA	NH-Osteoblast	0	0	0	0	0	0	0	0	1	1	1	1	0	1	1	1	1	0	0	0	1	0	0	0	0	1	1	1	1	0	1	1	1
Rheumatoid_arthritis	rs55686954	rs55686954	chr2	204586515	0.2322	none	CD28	none	NA	Th0	0	0	0	0	0	0	0	1	1	1	1	1	1	1	1	1	1	1	0	0	1	1	0	1	0	0	1	1	0	1	1	0	0
Rheumatoid_arthritis	rs55686954	rs3087243	chr2	204738919	0.1549	none	none	none	NA	CD25+_CD127-_Treg	0	0	0	0	0	0	0	1	1	1	1	1	1	1	1	0	0	0	0	0	0	0	0	0	0	0	0	0	0	0	0	0	0
Rheumatoid_arthritis	rs55686954	rs11571302	chr2	204742934	0.0555	none	none	none	NA	CD25+_CD127-_Treg	0	0	1	0	0	0	0	1	1	1	1	1	1	1	1	0	1	1	0	0	1	0	0	0	0	0	0	0	0	0	0	0	0
Rheumatoid_arthritis	rs55686954	rs117701653	chr2	204628795	0.0403	none	none	none	NA	Th0	0	0	0	0	0	0	0	1	1	1	1	1	1	1	1	1	1	0	0	0	0	0	0	0	1	0	0	0	0	1	0	0	0
Rheumatoid_arthritis	rs35677470-A	rs35677470	chr3	58183636	0.6956	missense	DNASE1L3	none	NA	adult_CD20	0	1	0	0	1	1	0	0	0	0	0	0	1	1	1	1	0	1	1	1	1	1	0	1	1	1	1	1	1	1	0	0	0
Rheumatoid_arthritis	rs35677470-A	rs4681851	chr3	58395891	0.0287	nearsplice	PXK	none	NA	substantia_nigra	1	1	1	1	1	1	1	1	1	1	1	1	0	1	0	1	0	1	1	0	1	1	0	0	0	1	0	1	0	1	1	1	0
Rheumatoid_arthritis	rs35677470-A	rs35975336	chr3	58451634	0.0281	none	none	none	NA	none	0	0	0	0	0	0	0	0	0	0	0	0	0	0	0	0	0	0	0	0	0	0	0	0	0	0	0	0	0	0	0	0	0
Rheumatoid_arthritis	rs932036	rs932036	chr4	26090862	0.1083	none	none	none	NA	CD25-_IL17+_Th17_stim	0	0	0	0	1	0	0	0	1	1	1	1	1	1	1	1	0	1	1	1	1	1	0	0	0	1	0	0	0	0	1	1	1
Rheumatoid_arthritis	rs932036	rs17630466	chr4	26086569	0.0645	none	none	none	NA	Th1	0	0	0	0	0	0	0	0	1	1	1	1	1	1	1	0	0	1	0	1	1	0	1	0	0	1	0	0	0	0	1	1	0
Rheumatoid_arthritis	rs932036	rs34185821	chr4	26085480	0.063	none	none	none	NA	Th1	0	0	0	0	0	0	0	0	1	1	1	1	1	1	1	0	1	0	0	1	0	0	0	0	1	1	0	1	1	0	1	1	1
Rheumatoid_arthritis	rs932036	rs4473645	chr4	26091198	0.0628	none	none	none	NA	CD25-_IL17+_Th17_stim	0	0	0	0	1	0	0	0	1	1	1	1	1	1	1	1	0	1	1	1	1	1	0	0	0	1	0	0	0	0	1	1	1
Rheumatoid_arthritis	rs932036	rs16878091	chr4	26088128	0.0587	none	none	none	NA	AdiposeNuclei	0	0	0	1	0	0	1	0	1	0	0	1	1	1	1	1	0	1	0	0	0	0	0	1	0	1	0	0	0	0	1	1	0
Rheumatoid_arthritis	rs932036	rs35944082	chr4	26095314	0.0541	none	none	none	NA	CD25-_IL17+_Th17_stim	0	0	0	0	0	0	0	0	1	1	1	1	1	1	1	0	0	0	1	1	0	0	0	0	0	1	0	0	0	0	1	0	1
Rheumatoid_arthritis	rs932036	rs11933540	chr4	26120001	0.0526	none	none	none	NA	none	0	0	0	0	0	0	0	0	0	0	0	0	0	0	0	0	0	0	0	0	0	0	0	0	0	0	0	0	0	0	0	0	0
Rheumatoid_arthritis	rs932036	rs36020664	chr4	26120328	0.0473	none	none	none	NA	none	0	0	0	0	0	0	0	0	0	0	0	0	0	0	0	0	0	0	0	0	0	0	0	0	0	0	0	0	0	0	0	0	0
Rheumatoid_arthritis	rs932036	rs10517086	chr4	26085511	0.0444	none	none	none	NA	Th1	0	0	0	0	0	0	0	0	1	1	1	1	1	1	1	0	1	0	0	1	0	0	0	0	1	1	0	1	1	0	1	1	1
Rheumatoid_arthritis	rs932036	rs12506688	chr4	26104113	0.0428	none	none	none	NA	none	0	0	0	0	0	0	0	0	0	0	0	0	0	0	0	0	0	0	0	0	0	0	0	0	0	0	0	0	0	0	0	0	0
Rheumatoid_arthritis	rs932036	rs874040	chr4	26108197	0.0374	none	none	none	NA	AdiposeNuclei	1	0	0	0	1	0	0	0	0	1	1	1	0	0	0	1	1	0	0	0	0	1	1	1	1	1	0	1	0	0	1	0	1
Rheumatoid_arthritis	rs932036	rs6448432	chr4	26098810	0.0355	none	none	none	NA	none	0	0	0	0	0	0	0	0	0	0	0	0	0	0	0	0	0	0	0	0	0	0	0	0	0	0	0	0	0	0	0	0	0
Rheumatoid_arthritis	rs932036	rs36110812	chr4	26120478	0.0353	none	none	none	NA	none	0	0	0	0	0	0	0	0	0	0	0	0	0	0	0	0	0	0	0	0	0	0	0	0	0	0	0	0	0	0	0	0	0
Rheumatoid_arthritis	rs932036	rs34897565	chr4	26115747	0.035	none	none	none	NA	none	0	0	0	0	0	0	0	0	0	0	0	0	0	0	0	0	0	0	0	0	0	0	0	0	0	0	0	0	0	0	0	0	0
Rheumatoid_arthritis	rs932036	rs35858516	chr4	26128710	0.033	none	none	none	NA	HSMM-myotube	0	0	0	0	0	0	0	0	0	0	0	1	1	0	1	0	1	0	0	1	0	0	0	0	0	0	0	0	0	0	1	0	0
Rheumatoid_arthritis	rs932036	rs6448434	chr4	26110113	0.0323	none	none	none	NA	none	0	0	0	0	0	0	0	0	0	0	0	0	0	0	0	0	0	0	0	0	0	0	0	0	0	0	0	0	0	0	0	0	0
Rheumatoid_arthritis	rs932036	rs7668577	chr4	26123319	0.0317	none	none	none	NA	none	0	0	0	0	0	0	0	0	0	0	0	0	0	0	0	0	0	0	0	0	0	0	0	0	0	0	0	0	0	0	0	0	0
Rheumatoid_arthritis	rs932036	rs6825116	chr4	26122858	0.0311	none	none	none	NA	none	0	0	0	0	0	0	0	0	0	0	0	0	0	0	0	0	0	0	0	0	0	0	0	0	0	0	0	0	0	0	0	0	0
Rheumatoid_arthritis	rs932036	rs34046593	chr4	26111593	0.0295	none	none	none	NA	none	0	0	0	0	0	0	0	0	0	0	0	0	0	0	0	0	0	0	0	0	0	0	0	0	0	0	0	0	0	0	0	0	0
Rheumatoid_arthritis	rs932036	rs6848239	chr4	26114046	0.0294	none	none	none	NA	none	0	0	0	0	0	0	0	0	0	0	0	0	0	0	0	0	0	0	0	0	0	0	0	0	0	0	0	0	0	0	0	0	0
Rheumatoid_arthritis	rs71624119-A	rs71624119	chr5	55440730	0.4794	none	ANKRD55	none	NA	CD25-_CD45RA+_naive	0	0	0	0	1	0	0	1	1	1	1	0	1	1	1	1	1	1	0	1	0	0	1	1	0	0	1	1	0	1	0	0	0
Rheumatoid_arthritis	rs71624119-A	rs10213692	chr5	55442249	0.4794	none	ANKRD55	none	NA	none	0	0	0	0	0	0	0	0	0	0	0	0	0	0	0	0	0	0	0	0	0	0	0	0	0	0	0	0	0	0	0	0	0
Rheumatoid_arthritis	rs71624119-A	rs6873385	chr5	55436851	0.033	none	ANKRD55	none	NA	none	0	0	0	0	0	0	0	0	0	0	0	0	0	0	0	0	0	0	0	0	0	0	0	0	0	0	0	0	0	0	0	0	0
Rheumatoid_arthritis	rs39984-A	rs39984	chr5	102597292	0.0849	none	C5orf30	none	NA	AdiposeNuclei	1	1	1	1	1	1	1	1	1	0	1	0	1	1	0	1	1	0	0	1	1	1	1	1	0	1	0	1	1	1	1	1	1
Rheumatoid_arthritis	rs39984-A	rs1610957	chr5	102596167	0.0513	none	C5orf30	none	NA	AdiposeNuclei	1	1	1	1	1	1	1	1	1	1	1	1	1	1	1	1	1	1	1	1	1	1	1	1	1	1	1	1	1	1	1	1	1
Rheumatoid_arthritis	rs39984-A	rs26233	chr5	102596816	0.0513	none	C5orf30	none	NA	AdiposeNuclei	1	1	1	1	1	1	1	1	1	0	1	0	1	1	0	1	1	0	0	1	1	1	1	1	0	1	0	1	1	1	1	1	1
Rheumatoid_arthritis	rs39984-A	rs376286	chr5	102599390	0.0311	none	C5orf30	none	NA	AdiposeNuclei	0	1	0	0	1	1	0	1	0	0	0	1	0	0	0	0	1	0	1	1	0	1	1	0	0	1	0	0	1	0	0	1	1
Rheumatoid_arthritis	rs39984-A	rs434830	chr5	102599306	0.0301	none	C5orf30	none	NA	AdiposeNuclei	1	1	1	1	1	1	1	0	1	1	0	0	0	0	0	0	1	0	0	1	0	1	1	1	1	1	0	1	1	1	1	1	1
Rheumatoid_arthritis	rs39984-A	rs2561477	chr5	102608924	0.0295	none	C5orf30	none	NA	K562	1	1	1	1	1	1	1	0	1	1	0	0	0	0	0	0	1	1	1	1	0	1	1	0	1	1	1	0	1	1	1	1	1
Rheumatoid_arthritis	rs72928038	rs72928038	chr6	90976768	0.5405	none	BACH2	none	NA	CD25-_CD45RA+_naive	0	0	0	0	0	0	0	1	1	1	1	1	1	1	1	1	1	0	1	0	1	0	0	1	0	0	0	0	0	0	1	0	0
Rheumatoid_arthritis	rs72928038	rs56258221	chr6	91030441	0.1268	none	none	none	NA	CD25-_IL17-_Th_stim_MACS	0	0	0	0	0	0	0	1	0	1	1	1	1	1	1	1	1	0	1	0	1	0	1	0	0	0	0	0	0	0	0	0	0
Rheumatoid_arthritis	rs72928038	rs72928089	chr6	91034318	0.1031	none	none	none	NA	none	0	0	0	0	0	0	0	0	0	0	0	0	0	0	0	0	0	0	0	0	0	0	0	0	0	0	0	0	0	0	0	0	0
Rheumatoid_arthritis	rs72928038	rs10944479	chr6	90880393	0.084	none	BACH2	none	NA	adult_CD20	0	0	0	0	0	0	0	1	0	1	1	1	1	1	0	1	0	0	1	0	1	0	0	0	0	0	0	0	0	0	1	0	0
Rheumatoid_arthritis	rs72928038	rs6919512	chr6	91037287	0.0787	none	none	none	NA	B_Cell_Centroblast	0	0	0	0	0	0	0	0	0	0	1	0	0	0	1	1	0	0	0	0	1	1	0	0	0	0	0	0	0	0	0	0	0
Rheumatoid_arthritis	rs72928038	rs6908626	chr6	91005743	0.0574	none	BACH2	none	NA	CD25-_CD45RA+_naive	1	1	1	1	1	1	1	1	1	1	1	1	1	1	1	1	1	0	1	1	1	1	1	1	1	1	0	1	1	1	1	0	1
Rheumatoid_arthritis	rs6920220-A	rs6920220	chr6	138006504	0.2209	none	none	none	NA	none	0	0	0	0	0	0	0	0	0	0	0	0	0	0	0	0	0	0	0	0	0	0	0	0	0	0	0	0	0	0	0	0	0
Rheumatoid_arthritis	rs6920220-A	rs11757201	chr6	138003822	0.2209	none	none	none	NA	none	0	0	0	0	0	0	0	0	0	0	0	0	0	0	0	0	0	0	0	0	0	0	0	0	0	0	0	0	0	0	0	0	0
Rheumatoid_arthritis	rs6920220-A	rs17264332	chr6	138005515	0.1189	none	none	none	NA	none	0	0	0	0	0	0	0	0	0	0	0	0	0	0	0	0	0	0	0	0	0	0	0	0	0	0	0	0	0	0	0	0	0
Rheumatoid_arthritis	rs6920220-A	rs6927172	chr6	138002175	0.1119	none	none	none	NA	CD25-_IL17+_Th17_stim	0	0	0	0	0	0	0	1	0	1	1	1	1	1	1	0	0	0	1	1	1	1	0	0	0	1	1	0	0	0	1	1	0
Rheumatoid_arthritis	rs6920220-A	rs2327832	chr6	137973068	0.0877	none	none	none	NA	colonic_mucosa	0	0	0	0	0	0	0	1	1	1	1	0	1	1	1	0	0	0	0	0	0	0	0	1	1	0	1	1	0	0	0	0	0
Rheumatoid_arthritis	rs6920220-A	rs6933404	chr6	137959235	0.0778	none	none	none	NA	GM12878	0	0	0	0	0	0	0	1	1	1	0	1	0	0	1	0	1	0	1	1	0	0	1	0	0	0	0	0	0	0	1	1	0
Rheumatoid_arthritis	rs6920220-A	rs928722	chr6	137973832	0.0352	none	none	none	NA	colonic_mucosa	0	0	0	0	0	0	0	0	0	0	0	0	0	0	1	0	0	0	0	1	1	0	0	1	1	0	1	0	0	0	0	0	0
Rheumatoid_arthritis	rs75351767	rs75351767	chr7	37427351	0.0502	none	ELMO1	none	NA	substantia_nigra	1	1	1	1	1	1	1	1	0	1	1	1	1	0	1	1	0	1	1	0	0	1	0	1	0	1	0	1	0	1	0	0	0
Rheumatoid_arthritis	rs75351767	rs74830391	chr7	37427289	0.0338	none	ELMO1	none	NA	substantia_nigra	1	1	1	1	1	1	1	1	0	1	1	1	1	0	1	1	0	1	1	0	0	1	0	1	0	1	0	1	0	1	0	0	0
Rheumatoid_arthritis	rs75351767	rs80067358	chr7	37406443	0.0302	none	ELMO1	none	NA	Th1	0	0	0	0	1	0	0	1	0	1	1	0	1	1	1	0	0	1	1	0	0	0	0	0	1	0	0	1	0	0	0	0	0
Rheumatoid_arthritis	rs75351767	rs78260899	chr7	37406600	0.0302	none	ELMO1	none	NA	none	0	0	0	0	0	0	0	0	0	0	0	0	0	0	0	0	0	0	0	0	0	0	0	0	0	0	0	0	0	0	0	0	0
Rheumatoid_arthritis	rs75351767	rs113659298	chr7	37406615	0.0302	none	ELMO1	none	NA	none	0	0	0	0	0	0	0	0	0	0	0	0	0	0	0	0	0	0	0	0	0	0	0	0	0	0	0	0	0	0	0	0	0
Rheumatoid_arthritis	rs75351767	rs113358832	chr7	37406676	0.0302	none	ELMO1	none	NA	none	0	0	0	0	0	0	0	0	0	0	0	0	0	0	0	0	0	0	0	0	0	0	0	0	0	0	0	0	0	0	0	0	0
Rheumatoid_arthritis	rs75351767	rs80248977	chr7	37406679	0.0302	none	ELMO1	none	NA	none	0	0	0	0	0	0	0	0	0	0	0	0	0	0	0	0	0	0	0	0	0	0	0	0	0	0	0	0	0	0	0	0	0
Rheumatoid_arthritis	rs75351767	rs79623126	chr7	37406855	0.0302	none	ELMO1	none	NA	none	0	0	0	0	0	0	0	0	0	0	0	0	0	0	0	0	0	0	0	0	0	0	0	0	0	0	0	0	0	0	0	0	0
Rheumatoid_arthritis	rs75351767	rs112919320	chr7	37407849	0.0302	none	ELMO1	none	NA	none	0	0	0	0	0	0	0	0	0	0	0	0	0	0	0	0	0	0	0	0	0	0	0	0	0	0	0	0	0	0	0	0	0
Rheumatoid_arthritis	rs75351767	rs78369415	chr7	37408774	0.0302	none	ELMO1	none	NA	none	0	0	0	0	0	0	0	0	0	0	0	0	0	0	0	0	0	0	0	0	0	0	0	0	0	0	0	0	0	0	0	0	0
Rheumatoid_arthritis	rs75351767	rs112999567	chr7	37412964	0.0302	none	ELMO1	none	NA	none	0	0	0	0	0	0	0	0	0	0	0	0	0	0	0	0	0	0	0	0	0	0	0	0	0	0	0	0	0	0	0	0	0
Rheumatoid_arthritis	rs75351767	rs16879645	chr7	37400469	0.0295	none	ELMO1	none	NA	Th1	0	0	0	0	1	0	1	1	1	1	1	1	1	1	1	1	0	1	1	0	0	1	1	0	1	1	0	1	0	0	0	0	0
Rheumatoid_arthritis	rs3807306-C	rs3807306	chr7	128580680	0.3363	none	IRF5	none	NA	GM12878	1	1	1	1	1	1	1	0	1	1	1	1	1	1	1	0	0	1	1	1	1	1	1	1	1	1	1	1	0	1	0	0	0
Rheumatoid_arthritis	rs3807306-C	rs3778754	chr7	128575552	0.0574	none	none	none	NA	GM12878	0	0	0	0	1	0	1	0	0	0	1	1	1	1	1	0	0	1	1	1	1	1	1	1	0	1	1	1	0	1	0	0	0
Rheumatoid_arthritis	rs3807306-C	rs3778753	chr7	128580042	0.0504	none	IRF5	none	NA	GM12878	1	1	1	1	1	1	1	0	1	1	1	1	1	1	1	0	0	1	1	1	1	1	1	1	1	1	1	1	0	1	0	0	0
Rheumatoid_arthritis	rs3807306-C	rs4728142	chr7	128573967	0.0421	none	none	none	NA	GM12878	1	1	1	1	1	1	1	1	1	1	1	1	1	1	1	0	1	1	1	1	1	1	1	1	1	1	0	1	0	1	0	0	0
Rheumatoid_arthritis	rs3807306-C	rs3807307	chr7	128579202	0.0381	none	IRF5	none	NA	GM12878	1	1	1	1	1	1	1	1	1	1	1	1	1	1	1	0	1	1	1	1	0	1	0	1	1	1	0	1	0	1	0	0	0
Rheumatoid_arthritis	rs3807306-C	rs3823536	chr7	128579666	0.0345	none	IRF5	none	NA	GM12878	1	1	1	1	1	1	1	0	1	1	1	1	1	1	1	0	0	1	1	1	1	1	1	1	1	1	1	1	0	1	0	0	0
Rheumatoid_arthritis	rs2812378-G	rs2812378	chr9	34710260	0.5165	none	none	none	NA	none	0	0	0	0	0	0	0	0	0	0	0	0	0	0	0	0	0	0	0	0	0	0	0	0	0	0	0	0	0	0	0	0	0
Rheumatoid_arthritis	rs2812378-G	rs11574914	chr9	34710338	0.2121	none	none	none	NA	none	0	0	0	0	0	0	0	0	0	0	0	0	0	0	0	0	0	0	0	0	0	0	0	0	0	0	0	0	0	0	0	0	0
Rheumatoid_arthritis	rs2812378-G	rs10972201	chr9	34707373	0.2095	none	none	none	NA	none	0	0	0	0	0	0	0	0	0	0	0	0	0	0	0	0	0	0	0	0	0	0	0	0	0	0	0	0	0	0	0	0	0
Rheumatoid_arthritis	rs2812378-G	rs10814138	chr9	34723035	0.0382	none	none	none	NA	none	0	0	0	0	0	0	0	0	0	0	0	0	0	0	0	0	0	0	0	0	0	0	0	0	0	0	0	0	0	0	0	0	0
Rheumatoid_arthritis	rs8043085-A	rs8043085	chr15	38828140	0.361	none	RASGRP1	none	NA	NH-Osteoblast	1	1	1	1	1	1	1	1	1	1	1	1	1	1	1	1	1	0	1	1	0	0	0	1	0	1	0	1	1	1	1	1	1
Rheumatoid_arthritis	rs8043085-A	rs8032939	chr15	38834033	0.0609	none	RASGRP1	none	NA	CD25-_IL17-_Th_stim_MACS	0	0	1	0	0	0	0	1	1	1	1	1	1	1	1	1	1	0	1	1	0	0	0	0	0	0	0	0	1	1	0	1	0
Rheumatoid_arthritis	rs8043085-A	rs8035957	chr15	38838264	0.0341	none	RASGRP1	none	NA	CD25+_CD127-_Treg	0	0	0	0	0	0	0	1	1	1	1	1	0	1	1	1	0	0	0	0	1	0	0	0	0	0	0	0	1	0	0	1	1
Rheumatoid_arthritis	rs8043085-A	rs12593201	chr15	38844106	0.0334	none	RASGRP1	none	NA	CD25+_CD127-_Treg	0	1	0	0	0	1	0	1	1	1	1	1	1	1	1	1	1	0	1	1	0	1	0	0	1	0	0	0	1	1	0	0	0
Rheumatoid_arthritis	rs8043085-A	rs28536554	chr15	38838432	0.0331	none	RASGRP1	none	NA	CD25+_CD127-_Treg	0	0	0	0	0	0	0	1	1	1	1	1	0	1	1	1	0	0	0	0	1	0	0	0	0	0	0	0	1	0	0	1	1
Rheumatoid_arthritis	rs8043085-A	rs72727387	chr15	38843476	0.0311	none	RASGRP1	none	NA	CD25+_CD127-_Treg	0	0	0	0	0	0	0	1	1	1	1	1	1	1	1	1	0	0	1	1	0	0	1	0	0	0	0	0	1	0	0	0	0
Rheumatoid_arthritis	rs8043085-A	rs11073337	chr15	38847763	0.0302	none	RASGRP1	none	NA	Th2	1	0	1	1	0	1	1	1	1	1	1	1	1	1	1	1	1	0	1	1	1	0	0	0	1	0	0	0	1	1	0	1	0
Rheumatoid_arthritis	rs8043085-A	rs72727388	chr15	38843694	0.0277	none	RASGRP1	none	NA	CD25+_CD127-_Treg	0	0	0	0	0	0	0	1	1	1	1	1	1	1	1	1	0	0	1	1	0	0	1	0	0	0	0	0	1	0	0	0	0
Rheumatoid_arthritis	rs13330176-A	rs13330176	chr16	86019087	0.2728	none	none	none	NA	adult_CD14	0	0	0	0	1	0	0	0	0	0	0	0	1	1	1	0	1	1	1	1	1	0	0	1	1	1	1	1	0	0	0	0	0
Rheumatoid_arthritis	rs13330176-A	rs72807051	chr16	86005933	0.1472	none	none	none	NA	colonic_mucosa	0	0	0	0	0	0	0	1	1	1	1	1	1	1	1	1	0	1	1	1	1	1	1	1	1	0	0	1	0	1	0	0	0
Rheumatoid_arthritis	rs13330176-A	rs9927316	chr16	86016401	0.1325	none	none	none	NA	adult_CD14	0	0	0	0	1	1	1	0	0	0	0	1	0	1	0	0	0	1	1	1	1	0	0	1	1	0	0	1	0	0	0	0	0
Rheumatoid_arthritis	rs13330176-A	rs13333054	chr16	86011033	0.0801	none	none	none	NA	adult_CD14	0	0	0	0	0	0	0	0	0	0	0	1	1	0	0	0	0	1	0	0	0	0	1	1	1	0	1	1	0	1	0	0	0
Rheumatoid_arthritis	rs13330176-A	rs12232384	chr16	86009760	0.0615	none	none	none	NA	colonic_mucosa	0	0	0	0	0	0	0	0	1	0	0	0	0	1	1	1	0	1	1	0	1	1	0	1	1	0	0	1	0	1	0	0	0
Rheumatoid_arthritis	rs13330176-A	rs9933582	chr16	86016026	0.0461	none	none	none	NA	adult_CD14	0	0	0	0	1	1	1	0	0	0	0	1	0	1	0	0	0	1	1	1	1	0	0	1	1	0	0	1	0	0	0	0	0
Rheumatoid_arthritis	rs13330176-A	rs9939427	chr16	86016091	0.0418	none	none	none	NA	adult_CD14	0	0	0	0	1	1	1	0	0	0	0	1	0	1	0	0	0	1	1	1	1	0	0	1	1	0	0	1	0	0	0	0	0
Rheumatoid_arthritis	rs13330176-A	rs68143182	chr16	86005838	0.0394	none	none	none	NA	colonic_mucosa	0	0	0	0	0	0	0	1	1	1	1	1	1	1	1	1	0	1	1	1	1	1	1	1	1	0	0	1	0	1	0	0	0
Rheumatoid_arthritis	rs12936409-A	rs12936409	chr17	38043649	0.049	none	none	none	NA	none	0	0	0	0	0	0	0	0	0	0	0	0	0	0	0	0	0	0	0	0	0	0	0	0	0	0	0	0	0	0	0	0	0
Rheumatoid_arthritis	rs12936409-A	rs13380815	chr17	38027583	0.0358	none	ZPBP2	none	NA	B_Cell_Centroblast	0	0	0	0	0	0	0	1	0	1	1	0	0	0	0	0	0	0	1	1	1	0	0	0	0	0	0	0	0	0	0	0	0
Rheumatoid_arthritis	rs12936409-A	rs34189114	chr17	38032460	0.0358	none	ZPBP2	none	NA	none	0	0	0	0	0	0	0	0	0	0	0	0	0	0	0	0	0	0	0	0	0	0	0	0	0	0	0	0	0	0	0	0	0
Rheumatoid_arthritis	rs12936409-A	rs36038753	chr17	38035370	0.0358	none	none	none	NA	none	0	0	0	0	0	0	0	0	0	0	0	0	0	0	0	0	0	0	0	0	0	0	0	0	0	0	0	0	0	0	0	0	0
Rheumatoid_arthritis	rs12936409-A	rs34074973	chr17	38035766	0.0358	none	none	none	NA	none	0	0	0	0	0	0	0	0	0	0	0	0	0	0	0	0	0	0	0	0	0	0	0	0	0	0	0	0	0	0	0	0	0
Rheumatoid_arthritis	rs12936409-A	rs9904624	chr17	38036586	0.0358	none	none	none	NA	none	0	0	0	0	0	0	0	0	0	0	0	0	0	0	0	0	0	0	0	0	0	0	0	0	0	0	0	0	0	0	0	0	0
Rheumatoid_arthritis	rs12936409-A	rs12232498	chr17	38040363	0.0358	none	none	none	NA	none	0	0	0	0	0	0	0	0	0	0	0	0	0	0	0	0	0	0	0	0	0	0	0	0	0	0	0	0	0	0	0	0	0
Rheumatoid_arthritis	rs12936409-A	rs12941333	chr17	38040534	0.0358	none	none	none	NA	none	0	0	0	0	0	0	0	0	0	0	0	0	0	0	0	0	0	0	0	0	0	0	0	0	0	0	0	0	0	0	0	0	0
Rheumatoid_arthritis	rs74956615	rs74956615	chr19	10427721	0.9661	utr3	RAVER1	none	NA	CD25+_CD127-_Treg	0	1	0	0	1	0	1	1	0	1	1	0	0	0	1	0	1	1	1	0	1	1	1	0	0	0	0	0	1	0	0	0	0
Rheumatoid_arthritis	rs12131057-G	rs12131057	chr1	38624129	0.2464	none	none	none	NA	none	0	0	0	0	0	0	0	0	0	0	0	0	0	0	0	0	0	0	0	0	0	0	0	0	0	0	0	0	0	0	0	0	0
Rheumatoid_arthritis	rs12131057-G	rs883220	chr1	38616871	0.1443	none	none	none	NA	B_Cell_Centroblast	0	0	0	0	0	0	0	0	0	0	0	0	0	0	0	0	0	0	0	0	1	0	0	0	0	0	0	0	0	0	0	0	0
Rheumatoid_arthritis	rs12131057-G	rs12140275	chr1	38633879	0.0955	none	none	none	NA	none	0	0	0	0	0	0	0	0	0	0	0	0	0	0	0	0	0	0	0	0	0	0	0	0	0	0	0	0	0	0	0	0	0
Rheumatoid_arthritis	rs12131057-G	rs2045793	chr1	38635462	0.0955	none	none	none	NA	none	0	0	0	0	0	0	0	0	0	0	0	0	0	0	0	0	0	0	0	0	0	0	0	0	0	0	0	0	0	0	0	0	0
Rheumatoid_arthritis	rs12131057-G	rs2045791	chr1	38635692	0.0955	none	none	none	NA	none	0	0	0	0	0	0	0	0	0	0	0	0	0	0	0	0	0	0	0	0	0	0	0	0	0	0	0	0	0	0	0	0	0
Rheumatoid_arthritis	rs12131057-G	rs7544568	chr1	38639208	0.0955	none	none	none	NA	B_Cell_Centroblast	0	0	0	0	0	0	0	0	0	1	0	0	1	1	1	0	0	1	1	1	1	0	0	0	0	0	0	0	0	0	0	0	0
Rheumatoid_arthritis	rs12131057-G	rs7540342	chr1	38622268	0.0773	none	none	none	NA	none	0	0	0	0	0	0	0	0	0	0	0	0	0	0	0	0	0	0	0	0	0	0	0	0	0	0	0	0	0	0	0	0	0
Rheumatoid_arthritis	rs12131057-G	rs2085993	chr1	38614867	0.0714	none	none	none	NA	none	0	0	0	0	0	0	0	0	0	0	0	0	0	0	0	0	0	0	0	0	0	0	0	0	0	0	0	0	0	0	0	0	0
Rheumatoid_arthritis	rs12131057-G	rs7553012	chr1	38644861	0.0398	none	none	none	NA	none	0	0	0	0	0	0	0	0	0	0	0	0	0	0	0	0	0	0	0	0	0	0	0	0	0	0	0	0	0	0	0	0	0
Rheumatoid_arthritis	rs2867461-A	rs2867461	chr4	79513215	0.6311	none	ANXA3	none	NA	AdiposeNuclei	1	0	0	1	1	0	1	0	0	0	0	0	0	1	0	0	0	0	1	0	0	1	1	1	1	1	0	1	1	1	1	0	0
Rheumatoid_arthritis	rs2867461-A	rs10028001	chr4	79502972	0.0647	none	ANXA3	none	NA	none	0	0	0	0	0	0	0	0	0	0	0	0	0	0	0	0	0	0	0	0	0	0	0	0	0	0	0	0	0	0	0	0	0
Rheumatoid_arthritis	rs12529514-C	rs12529514	chr6	14096658	0.2019	none	none	none	NA	adult_CD20	0	0	0	0	0	0	0	1	0	1	1	1	1	0	1	1	0	1	1	1	1	1	1	0	1	0	0	0	0	0	0	0	0
Rheumatoid_arthritis	rs12529514-C	rs151163961	chr6	14097014	0.2019	none	none	none	NA	adult_CD20	0	0	0	0	0	0	0	1	0	1	1	1	1	0	1	1	0	1	1	1	1	1	1	0	1	0	0	0	0	0	0	0	0
Rheumatoid_arthritis	rs12529514-C	rs74405933	chr6	14095755	0.0985	none	none	none	NA	adult_CD20	0	0	0	0	1	1	1	0	1	1	1	1	1	1	1	0	0	1	1	1	1	1	1	0	0	0	0	1	0	0	0	0	0
Rheumatoid_arthritis	rs12529514-C	rs16874672	chr6	14087484	0.0725	none	none	none	NA	none	0	0	0	0	0	0	0	0	0	0	0	0	0	0	0	0	0	0	0	0	0	0	0	0	0	0	0	0	0	0	0	0	0
Rheumatoid_arthritis	rs12529514-C	rs78242827	chr6	14089210	0.0725	none	none	none	NA	B_Cell_Centroblast	0	0	0	0	0	0	0	0	0	1	0	1	1	1	0	0	0	0	1	1	1	0	1	0	0	0	0	0	0	0	0	0	0
Rheumatoid_arthritis	rs12529514-C	rs77008887	chr6	14089335	0.0725	none	none	none	NA	B_Cell_Centroblast	0	0	0	0	0	0	0	0	0	1	0	1	1	1	0	0	0	0	1	1	1	0	1	0	0	0	0	0	0	0	0	0	0
Rheumatoid_arthritis	rs12529514-C	rs16874680	chr6	14089043	0.0568	none	none	none	NA	none	0	0	0	0	0	0	0	0	0	0	0	0	0	0	0	0	0	0	0	0	0	0	0	0	0	0	0	0	0	0	0	0	0
Rheumatoid_arthritis	rs12529514-C	rs76627429	chr6	14098470	0.0437	none	none	none	NA	adult_CD20	0	0	0	0	0	0	0	0	0	0	0	0	1	0	0	1	0	0	1	0	1	1	0	0	1	0	0	0	0	0	0	0	0
Rheumatoid_arthritis	rs12529514-C	rs79899983	chr6	14089199	0.035	none	none	none	NA	B_Cell_Centroblast	0	0	0	0	0	0	0	0	0	1	0	1	1	1	0	0	0	0	1	1	1	0	1	0	0	0	0	0	0	0	0	0	0
Rheumatoid_arthritis	rs2233434-G	rs2233434	chr6	44232920	0.1096	missense	NFKBIE	none	NA	adult_CD20	1	1	1	1	1	1	1	1	1	1	1	1	1	1	1	1	1	1	1	1	1	1	1	1	1	1	1	1	1	1	1	1	1
Rheumatoid_arthritis	rs2233434-G	rs2233433	chr6	44232977	0.1096	missense	NFKBIE	none	NA	adult_CD20	1	1	1	1	1	1	1	1	1	1	1	1	1	1	1	1	1	1	1	1	1	1	1	1	1	1	1	1	1	1	1	1	1
Rheumatoid_arthritis	rs2233434-G	rs2233424	chr6	44233921	0.1096	none	none	none	NA	GM12878	1	1	1	1	1	1	1	1	1	1	1	1	1	1	1	1	1	1	1	1	1	1	1	1	1	1	0	1	1	0	0	0	1
Rheumatoid_arthritis	rs2233434-G	rs28362856	chr6	44234539	0.1096	none	none	none	NA	GM12878	1	1	1	1	1	1	1	1	1	1	1	1	1	1	1	1	1	1	1	1	1	1	1	1	1	1	0	1	1	0	0	0	1
Rheumatoid_arthritis	rs2233434-G	rs28362855	chr6	44234621	0.1096	none	none	none	NA	GM12878	1	1	1	1	1	1	1	1	1	1	1	1	1	1	1	1	1	1	1	1	1	1	1	1	1	1	0	1	1	0	0	0	1
Rheumatoid_arthritis	rs2233434-G	rs28362854	chr6	44234722	0.1096	none	none	none	NA	GM12878	1	1	1	1	1	1	1	1	1	1	1	1	1	1	1	1	1	1	1	1	1	1	1	1	1	1	0	1	1	0	0	0	1
Rheumatoid_arthritis	rs2233434-G	rs3799963	chr6	44231479	0.0276	none	NFKBIE	none	NA	adult_CD20	1	1	1	1	1	1	1	1	1	1	1	1	1	1	1	1	1	1	1	1	1	1	1	1	1	1	1	1	1	1	0	1	0
Rheumatoid_arthritis	rs11761231-C	rs11761231	chr7	131370039	0.367	none	none	none	NA	none	0	0	0	0	0	0	0	0	0	0	0	0	0	0	0	0	0	0	0	0	0	0	0	0	0	0	0	0	0	0	0	0	0
Rheumatoid_arthritis	rs11761231-C	rs4348414	chr7	131369298	0.367	none	none	none	NA	none	0	0	0	0	0	0	0	0	0	0	0	0	0	0	0	0	0	0	0	0	0	0	0	0	0	0	0	0	0	0	0	0	0
Rheumatoid_arthritis	rs11761231-C	rs71174986	chr7	131369662	0.1501	none	none	none	NA	none	0	0	0	0	0	0	0	0	0	0	0	0	0	0	0	0	0	0	0	0	0	0	0	0	0	0	0	0	0	0	0	0	0
Rheumatoid_arthritis	rs10821944-G	rs10821944	chr10	63785089	0.9287	none	ARID5B	none	NA	adult_CD20	0	0	0	0	0	0	0	1	0	1	1	1	1	1	1	1	0	0	1	1	0	0	0	1	1	1	1	0	1	1	1	1	1
Rheumatoid_arthritis	rs10821944-G	rs10740058	chr10	63795446	0.0283	none	ARID5B	none	NA	Th0	1	1	1	1	0	0	1	1	1	1	1	1	1	1	1	1	1	0	1	0	1	1	0	1	0	1	1	0	1	1	1	1	0
Rheumatoid_arthritis	rs3781913-T	rs3781913	chr11	72373496	0.1352	none	PDE2A	none	NA	none	0	0	0	0	0	0	0	0	0	0	0	0	0	0	0	0	0	0	0	0	0	0	0	0	0	0	0	0	0	0	0	0	0
Rheumatoid_arthritis	rs3781913-T	rs342322	chr11	72372071	0.1352	none	PDE2A	none	NA	none	0	0	0	0	0	0	0	0	0	0	0	0	0	0	0	0	0	0	0	0	0	0	0	0	0	0	0	0	0	0	0	0	0
Rheumatoid_arthritis	rs3781913-T	rs11235558	chr11	72373798	0.1352	none	PDE2A	none	NA	none	0	0	0	0	0	0	0	0	0	0	0	0	0	0	0	0	0	0	0	0	0	0	0	0	0	0	0	0	0	0	0	0	0
Rheumatoid_arthritis	rs1957895-G	rs1957895	chr14	61908332	0.2552	none	PRKCH	none	NA	CD25-_IL17-_Th_stim_MACS	0	0	0	0	0	0	0	1	1	1	1	1	1	1	1	1	0	0	0	1	0	0	0	0	0	1	0	1	0	0	0	0	0
Rheumatoid_arthritis	rs1957895-G	rs1957893	chr14	61908076	0.1437	none	PRKCH	none	NA	GM12878	0	0	0	0	0	0	0	1	1	1	1	1	1	1	1	1	0	0	0	1	1	1	0	1	1	1	0	0	1	0	0	0	0
Rheumatoid_arthritis	rs1957895-G	rs1957894	chr14	61908111	0.1437	none	PRKCH	none	NA	GM12878	0	0	0	0	0	0	0	1	1	1	1	1	1	1	1	1	0	0	0	1	1	1	0	1	1	1	0	0	1	0	0	0	0
Rheumatoid_arthritis	rs1957895-G	rs4899048	chr14	61909343	0.1437	none	PRKCH	none	NA	CD25-_IL17-_Th_stim_MACS	0	0	0	0	0	0	0	1	1	1	1	1	1	1	1	1	0	0	0	1	1	1	0	0	1	0	0	1	1	1	0	0	0
Rheumatoid_arthritis	rs1957895-G	rs10144353	chr14	61911157	0.1437	none	PRKCH	none	NA	CD25+_CD127-_Treg	0	0	0	0	0	0	0	1	1	1	1	1	1	1	1	1	1	1	1	1	0	1	1	1	0	0	1	1	1	0	0	0	0
Rheumatoid_arthritis	rs1957895-G	rs927686	chr14	61912138	0.1123	none	PRKCH	none	NA	CD25-_IL17-_Th_stim_MACS	0	0	0	0	0	0	0	1	1	1	1	1	1	1	1	1	1	1	1	1	0	1	0	0	0	1	0	1	0	0	0	0	0
Rheumatoid_arthritis	rs1957895-G	rs4636825	chr14	61907407	0.0577	none	PRKCH	none	NA	GM12878	0	0	0	0	0	0	0	1	1	1	1	1	1	1	1	1	0	0	0	1	1	1	0	1	1	1	0	0	1	0	0	0	0
Rheumatoid_arthritis	rs7155603-G	rs7155603	chr14	75960536	0.1897	none	none	none	NA	Th2	0	0	0	0	0	0	0	0	0	0	1	1	1	1	1	0	0	0	0	1	1	0	0	0	0	0	0	0	0	0	0	0	0
Rheumatoid_arthritis	rs7155603-G	rs7155418	chr14	75960449	0.1897	none	none	none	NA	Th2	0	0	0	0	0	0	0	1	0	1	1	1	1	1	1	0	0	0	0	1	0	1	0	0	0	0	0	0	0	0	0	0	0
Rheumatoid_arthritis	rs7155603-G	rs2359796	chr14	75960675	0.0938	none	none	none	NA	Th2	0	0	0	0	0	0	0	0	0	0	1	1	1	1	1	0	0	0	0	1	1	0	0	0	0	0	0	0	0	0	0	0	0
Rheumatoid_arthritis	rs7155603-G	rs4903324	chr14	75961511	0.0835	none	none	none	NA	Th2	0	0	0	0	0	0	0	0	0	0	1	1	1	1	1	0	0	0	0	1	1	0	0	0	0	0	0	0	0	0	0	0	0
Rheumatoid_arthritis	rs7155603-G	rs2192612	chr14	75967615	0.0532	none	none	none	NA	none	0	0	0	0	0	0	0	0	0	0	0	0	0	0	0	0	0	0	0	0	0	0	0	0	0	0	0	0	0	0	0	0	0
Rheumatoid_arthritis	rs7155603-G	rs4633654	chr14	75960941	0.0457	none	none	none	NA	Th2	0	0	0	0	0	0	0	0	0	0	1	1	1	1	1	0	0	0	0	1	1	0	0	0	0	0	0	0	0	0	0	0	0
Rheumatoid_arthritis	rs7155603-G	rs5809710	chr14	75971201	0.0373	none	none	none	NA	none	0	0	0	0	0	0	0	0	0	0	0	0	0	0	0	0	0	0	0	0	0	0	0	0	0	0	0	0	0	0	0	0	0
Rheumatoid_arthritis	rs7155603-G	rs2359733	chr14	75971400	0.0373	none	none	none	NA	none	0	0	0	0	0	0	0	0	0	0	0	0	0	0	0	0	0	0	0	0	0	0	0	0	0	0	0	0	0	0	0	0	0
Rheumatoid_arthritis	rs7155603-G	rs35250424	chr14	75973988	0.0373	none	none	none	NA	none	0	0	0	0	0	0	0	0	0	0	0	0	0	0	0	0	0	0	0	0	0	0	0	0	0	0	0	0	0	0	0	0	0
Rheumatoid_arthritis	rs7155603-G	rs8007016	chr14	75974691	0.0373	none	none	none	NA	none	0	0	0	0	0	0	0	0	0	0	0	0	0	0	0	0	0	0	0	0	0	0	0	0	0	0	0	0	0	0	0	0	0
Rheumatoid_arthritis	rs7155603-G	rs4899567	chr14	75978690	0.0373	none	none	none	NA	none	0	0	0	0	0	0	0	0	0	0	0	0	0	0	0	0	0	0	0	0	0	0	0	0	0	0	0	0	0	0	0	0	0
Rheumatoid_arthritis	rs7155603-G	rs28529147	chr14	75978944	0.0373	none	none	none	NA	none	0	0	0	0	0	0	0	0	0	0	0	0	0	0	0	0	0	0	0	0	0	0	0	0	0	0	0	0	0	0	0	0	0
Rheumatoid_arthritis	rs7155603-G	rs10136427	chr14	75979889	0.0373	none	none	none	NA	B_Cell_Centroblast	0	0	0	0	0	0	0	1	1	1	1	1	1	1	1	1	0	0	1	1	1	0	0	0	0	0	1	0	0	0	0	0	0
Rheumatoid_arthritis	rs2841277-T	rs2841277	chr14	105391005	0.6307	none	none	none	NA	B_Cell_Centroblast	1	0	0	1	1	1	1	0	0	0	0	0	1	1	0	0	0	1	1	1	1	1	0	1	1	0	0	1	0	0	0	0	0
Rheumatoid_arthritis	rs2841277-T	rs2819468	chr14	105392729	0.037	none	PLD4	none	NA	adult_CD20	1	0	1	1	1	1	1	0	0	0	0	0	1	1	0	0	0	1	1	1	1	1	0	1	1	0	0	1	0	0	0	0	0
Rheumatoid_arthritis	rs2841277-T	rs2582531	chr14	105392533	0.0303	none	PLD4	none	NA	adult_CD20	1	0	1	1	1	1	1	0	0	0	0	0	1	1	0	0	0	1	1	1	1	1	0	1	1	0	0	1	0	0	0	0	0
Multiple_sclerosis	rs3748816-A	rs3748816	chr1	2526746	0.0721	missense	MMEL1	none	NA	none	0	0	0	0	0	0	0	0	0	0	0	0	0	0	0	0	0	0	0	0	0	0	0	0	0	0	0	0	0	0	0	0	0
Multiple_sclerosis	rs3748816-A	rs745367	chr1	2524457	0.0423	none	MMEL1	none	NA	CD25-_CD45RA+_naive	0	0	0	0	0	0	0	1	1	1	1	0	1	0	1	0	0	0	0	0	0	0	0	1	0	0	0	0	0	0	0	0	0
Multiple_sclerosis	rs3748816-A	rs3828154	chr1	2524943	0.0423	none	MMEL1	none	NA	none	0	0	0	0	0	0	0	0	0	0	0	0	0	0	0	0	0	0	0	0	0	0	0	0	0	0	0	0	0	0	0	0	0
Multiple_sclerosis	rs3748816-A	rs3748817	chr1	2525665	0.0423	none	MMEL1	none	NA	none	0	0	0	0	0	0	0	0	0	0	0	0	0	0	0	0	0	0	0	0	0	0	0	0	0	0	0	0	0	0	0	0	0
Multiple_sclerosis	rs3748816-A	rs2764845	chr1	2528999	0.0423	none	MMEL1	none	NA	none	0	0	0	0	0	0	0	0	0	0	0	0	0	0	0	0	0	0	0	0	0	0	0	0	0	0	0	0	0	0	0	0	0
Multiple_sclerosis	rs3748816-A	rs2843403	chr1	2529097	0.0423	none	MMEL1	none	NA	none	0	0	0	0	0	0	0	0	0	0	0	0	0	0	0	0	0	0	0	0	0	0	0	0	0	0	0	0	0	0	0	0	0
Multiple_sclerosis	rs3748816-A	rs2764841	chr1	2529360	0.0423	none	MMEL1	none	NA	none	0	0	0	0	0	0	0	0	0	0	0	0	0	0	0	0	0	0	0	0	0	0	0	0	0	0	0	0	0	0	0	0	0
Multiple_sclerosis	rs41286801-A	rs41286801	chr1	92975464	0.2477	utr3	EVI5	none	NA	none	0	0	0	0	0	0	0	0	0	0	0	0	0	0	0	0	0	0	0	0	0	0	0	0	0	0	0	0	0	0	0	0	0
Multiple_sclerosis	rs41286801-A	rs111410243	chr1	92972759	0.092	none	none	none	NA	none	0	0	0	0	0	0	0	0	0	0	0	0	0	0	0	0	0	0	0	0	0	0	0	0	0	0	0	0	0	0	0	0	0
Multiple_sclerosis	rs41286801-A	rs56252613	chr1	92971101	0.0914	none	none	none	NA	HepG2	0	0	0	0	0	0	0	0	0	0	0	1	0	0	1	0	1	0	0	1	1	1	0	0	0	0	1	1	0	0	1	0	0
Multiple_sclerosis	rs41286801-A	rs72722498	chr1	93028173	0.0598	none	EVI5	none	NA	none	0	0	0	0	0	0	0	0	0	0	0	0	0	0	0	0	0	0	0	0	0	0	0	0	0	0	0	0	0	0	0	0	0
Multiple_sclerosis	rs41286801-A	rs6689470	chr1	92951210	0.0587	none	GFI1	none	NA	Th2	0	0	0	0	0	0	1	1	1	1	1	1	1	1	1	1	1	1	1	1	1	1	1	1	1	0	1	1	1	0	0	0	0
Multiple_sclerosis	rs41286801-A	rs141111263	chr1	92964681	0.058	none	none	none	NA	none	0	0	0	0	0	0	0	0	0	0	0	0	0	0	0	0	0	0	0	0	0	0	0	0	0	0	0	0	0	0	0	0	0
Multiple_sclerosis	rs41286801-A	rs72722484	chr1	92994518	0.0573	none	EVI5	none	NA	none	0	0	0	0	0	0	0	0	0	0	0	0	0	0	0	0	0	0	0	0	0	0	0	0	0	0	0	0	0	0	0	0	0
Multiple_sclerosis	rs41286801-A	rs11581176	chr1	92982418	0.0527	none	EVI5	none	NA	adult_CD14	0	0	0	0	0	0	0	0	1	0	0	0	1	0	1	1	1	1	1	1	1	0	1	0	0	0	1	0	0	0	0	0	0
Multiple_sclerosis	rs41286801-A	rs11804321	chr1	93009313	0.0451	none	EVI5	none	NA	Th2	0	0	0	0	0	0	0	0	1	0	1	0	1	1	1	1	1	1	1	1	1	0	1	0	0	0	1	0	0	0	0	0	0
Multiple_sclerosis	rs41286801-A	rs72722475	chr1	92989743	0.0428	none	EVI5	none	NA	none	0	0	0	0	0	0	0	0	0	0	0	0	0	0	0	0	0	0	0	0	0	0	0	0	0	0	0	0	0	0	0	0	0
Multiple_sclerosis	rs41286801-A	rs56307974	chr1	93032170	0.0407	none	EVI5	none	NA	none	0	0	0	0	0	0	0	0	0	0	0	0	0	0	0	0	0	0	0	0	0	0	0	0	0	0	0	0	0	0	0	0	0
Multiple_sclerosis	rs41286801-A	rs72722469	chr1	92985247	0.0402	none	EVI5	none	NA	none	0	0	0	0	0	0	0	0	0	0	0	0	0	0	0	0	0	0	0	0	0	0	0	0	0	0	0	0	0	0	0	0	0
Multiple_sclerosis	rs41286801-A	rs6660889	chr1	92992700	0.034	none	EVI5	none	NA	none	0	0	0	0	0	0	0	0	0	0	0	0	0	0	0	0	0	0	0	0	0	0	0	0	0	0	0	0	0	0	0	0	0
Multiple_sclerosis	rs7552544-A	rs7552544	chr1	101240893	0.0732	none	none	none	NA	none	0	0	0	0	0	0	0	0	0	0	0	0	0	0	0	0	0	0	0	0	0	0	0	0	0	0	0	0	0	0	0	0	0
Multiple_sclerosis	rs7552544-A	rs6667465	chr1	101286780	0.0516	none	none	none	NA	none	0	0	0	0	0	0	0	0	0	0	0	0	0	0	0	0	0	0	0	0	0	0	0	0	0	0	0	0	0	0	0	0	0
Multiple_sclerosis	rs7552544-A	rs4568851	chr1	101237172	0.0299	none	none	none	NA	none	0	0	0	0	0	0	0	0	0	0	0	0	0	0	0	0	0	0	0	0	0	0	0	0	0	0	0	0	0	0	0	0	0
Multiple_sclerosis	rs6677309-A	rs6677309	chr1	117080166	0.4906	none	CD58	none	NA	adult_CD14	1	0	1	0	0	1	1	0	1	1	1	1	1	1	1	1	1	1	0	1	0	1	1	1	1	1	1	1	0	0	0	1	1
Multiple_sclerosis	rs6677309-A	rs1335532	chr1	117100957	0.2329	none	CD58	none	NA	GM12878	0	0	0	0	0	0	0	1	1	1	1	1	1	0	0	0	1	1	1	1	1	1	1	1	0	1	0	0	0	1	0	0	0
Multiple_sclerosis	rs6677309-A	rs35275493	chr1	117095502	0.0727	none	CD58	none	NA	GM12878	0	0	0	0	0	0	0	1	1	1	1	1	0	1	1	1	0	1	1	1	1	0	1	0	1	0	0	0	0	0	1	0	0
Multiple_sclerosis	rs6677309-A	rs10754324	chr1	117093035	0.0377	none	CD58	none	NA	GM12878	0	0	0	0	0	0	0	0	1	1	1	0	1	1	1	1	1	1	1	1	1	0	0	0	0	1	0	0	0	0	0	0	0
Multiple_sclerosis	rs6677309-A	rs1414273	chr1	117102649	0.0372	none	CD58	none	NA	GM12878	0	0	0	0	0	0	0	1	1	1	1	1	0	1	0	1	1	1	1	1	1	1	1	1	1	0	0	0	0	1	0	0	0
Multiple_sclerosis	rs35967351-A	rs35967351	chr1	160711804	0.2435	none	SLAMF7	none	NA	GM12878	0	0	0	0	0	0	0	1	1	0	1	0	1	1	1	1	1	1	1	1	1	0	0	1	1	0	0	1	0	0	0	0	0
Multiple_sclerosis	rs35967351-A	rs142216326	chr1	160719238	0.0592	none	SLAMF7	none	NA	Th1	0	0	0	0	0	0	0	1	1	0	0	0	1	1	1	0	0	1	1	1	1	0	0	0	0	0	0	0	0	0	0	0	0
Multiple_sclerosis	rs35967351-A	rs569932	chr1	160725854	0.0503	none	none	none	NA	Th1	0	0	0	0	0	0	0	1	1	0	1	1	1	1	1	1	1	0	0	1	1	0	0	1	1	0	0	1	0	1	0	0	0
Multiple_sclerosis	rs35967351-A	rs522112	chr1	160738007	0.0386	none	none	none	NA	GM12878	0	1	0	1	1	0	0	1	1	1	1	1	1	1	1	1	1	1	1	1	1	1	1	1	1	0	1	1	0	1	0	0	0
Multiple_sclerosis	rs35967351-A	rs12064520	chr1	160735520	0.0379	none	none	none	NA	CD25-_IL17+_Th17_stim	0	0	0	0	0	0	0	1	0	1	1	1	1	1	0	1	0	0	1	0	0	0	0	0	0	0	0	0	0	0	0	0	0
Multiple_sclerosis	rs35967351-A	rs574491	chr1	160735814	0.0363	none	none	none	NA	CD25-_IL17+_Th17_stim	0	0	0	0	0	0	0	1	0	1	1	1	1	1	0	1	0	0	1	0	0	0	0	0	0	0	0	0	0	0	0	0	0
Multiple_sclerosis	rs35967351-A	rs528095	chr1	160738146	0.0354	none	none	none	NA	GM12878	0	1	0	1	1	0	0	1	1	1	1	1	1	1	1	1	1	1	1	1	1	1	1	1	1	0	1	1	0	1	0	0	0
Multiple_sclerosis	rs35967351-A	rs495706	chr1	160723256	0.0352	none	SLAMF7	none	NA	none	0	0	0	0	0	0	0	0	0	0	0	0	0	0	0	0	0	0	0	0	0	0	0	0	0	0	0	0	0	0	0	0	0
Multiple_sclerosis	rs35967351-A	rs504170	chr1	160740706	0.0316	none	none	none	NA	none	0	0	0	0	0	0	0	0	0	0	0	0	0	0	0	0	0	0	0	0	0	0	0	0	0	0	0	0	0	0	0	0	0
Multiple_sclerosis	rs35967351-A	rs564833	chr1	160739371	0.0303	none	none	none	NA	none	0	0	0	0	0	0	0	0	0	0	0	0	0	0	0	0	0	0	0	0	0	0	0	0	0	0	0	0	0	0	0	0	0
Multiple_sclerosis	rs35967351-A	rs546757	chr1	160737621	0.0297	none	none	none	NA	GM12878	0	1	0	1	1	0	0	1	1	1	1	1	1	1	1	1	1	1	1	1	1	1	1	1	1	0	1	1	0	1	0	0	0
Multiple_sclerosis	rs1359062-C	rs1359062	chr1	192541472	0.1962	none	none	none	NA	CD25+_CD127-_Treg	0	0	0	0	0	0	0	1	1	1	1	1	1	1	1	1	1	1	1	0	0	0	0	1	1	0	0	0	0	0	1	0	0
Multiple_sclerosis	rs1359062-C	rs2760528	chr1	192536785	0.0792	none	none	none	NA	Th1	0	0	0	0	0	0	0	0	1	1	1	1	1	1	1	1	1	0	1	0	1	0	0	0	0	0	0	0	0	1	1	0	0
Multiple_sclerosis	rs1359062-C	rs1323297	chr1	192537400	0.0792	none	none	none	NA	none	0	0	0	0	0	0	0	0	0	0	0	0	0	0	0	0	0	0	0	0	0	0	0	0	0	0	0	0	0	0	0	0	0
Multiple_sclerosis	rs1359062-C	rs4636437	chr1	192536451	0.0529	none	none	none	NA	Th1	0	0	0	0	0	0	0	0	1	1	1	1	1	1	1	1	1	0	1	0	1	0	0	0	0	0	0	0	0	1	1	0	0
Multiple_sclerosis	rs1359062-C	rs2984919	chr1	192541172	0.0444	none	none	none	NA	CD25+_CD127-_Treg	0	0	0	0	0	0	0	1	1	1	1	1	1	1	1	1	1	1	1	0	0	0	0	1	1	0	0	0	0	0	1	0	0
Multiple_sclerosis	rs1359062-C	rs1323292	chr1	192541021	0.0435	none	none	none	NA	CD25+_CD127-_Treg	0	0	0	0	0	0	0	1	1	1	1	1	1	1	1	1	1	1	1	0	0	0	0	1	1	0	0	0	0	0	1	0	0
Multiple_sclerosis	rs1359062-C	rs2760527	chr1	192536758	0.0374	none	none	none	NA	Th1	0	0	0	0	0	0	0	0	1	1	1	1	1	1	1	1	1	0	1	0	1	0	0	0	0	0	0	0	0	1	1	0	0
Multiple_sclerosis	rs1359062-C	rs2760522	chr1	192529414	0.0326	none	none	none	NA	NH-Osteoblast	0	0	0	0	0	0	0	0	1	1	1	1	0	0	0	1	1	0	0	1	0	0	1	1	1	1	0	1	1	1	1	1	1
Multiple_sclerosis	rs1359062-C	rs10630758	chr1	192531530	0.0326	none	none	none	NA	none	0	0	0	0	0	0	0	0	0	0	0	0	0	0	0	0	0	0	0	0	0	0	0	0	0	0	0	0	0	0	0	0	0
Multiple_sclerosis	rs1359062-C	rs4658054	chr1	192524985	0.0326	none	none	none	NA	GM12878	0	0	0	0	0	0	0	0	1	1	0	1	0	1	0	1	1	0	0	1	0	0	0	0	0	0	0	0	0	0	0	1	1
Multiple_sclerosis	rs1359062-C	rs2816317	chr1	192536385	0.0318	none	none	none	NA	Th1	0	0	0	0	0	0	0	0	1	1	1	1	1	1	1	1	1	0	1	0	1	0	0	0	0	0	0	0	0	1	1	0	0
Multiple_sclerosis	rs1359062-C	rs2760521	chr1	192525276	0.0316	none	none	none	NA	GM12878	0	0	0	0	0	0	0	0	0	1	0	0	0	1	0	1	0	0	0	1	0	0	0	0	0	0	0	0	0	0	1	1	1
Multiple_sclerosis	rs1359062-C	rs2816315	chr1	192536886	0.0309	none	none	none	NA	none	0	0	0	0	0	0	0	0	0	0	0	0	0	0	0	0	0	0	0	0	0	0	0	0	0	0	0	0	0	0	0	0	0
Multiple_sclerosis	rs1359062-C	rs10709521	chr1	192530967	0.0282	none	none	none	NA	none	0	0	0	0	0	0	0	0	0	0	0	0	0	0	0	0	0	0	0	0	0	0	0	0	0	0	0	0	0	0	0	0	0
Multiple_sclerosis	rs12132298-A	rs12132298	chr1	200875095	0.1313	none	C1orf106	none	NA	colonic_mucosa	0	0	0	0	0	0	0	1	0	1	1	0	1	1	1	1	0	1	1	1	0	0	0	1	1	0	1	0	0	1	1	0	1
Multiple_sclerosis	rs12132298-A	rs12131796	chr1	200878727	0.0861	none	C1orf106	none	NA	colonic_mucosa	0	0	0	0	0	0	0	0	0	0	0	1	1	0	0	0	0	0	0	1	0	0	1	1	1	0	1	0	0	1	1	0	0
Multiple_sclerosis	rs12132298-A	rs12132349	chr1	200875242	0.0831	none	C1orf106	none	NA	colonic_mucosa	0	0	0	0	0	0	0	1	0	1	1	0	1	1	1	1	0	1	1	1	0	0	0	1	1	0	1	0	0	1	1	0	1
Multiple_sclerosis	rs12132298-A	rs59655222	chr1	200875897	0.0747	none	C1orf106	none	NA	colonic_mucosa	0	0	0	0	1	0	0	0	0	0	1	0	1	1	1	0	1	1	0	1	0	1	0	1	1	0	1	0	1	1	0	0	0
Multiple_sclerosis	rs12132298-A	rs55838263	chr1	200874728	0.0716	none	C1orf106	none	NA	Duodenum_mucosa	0	0	0	0	0	0	0	1	1	0	1	1	0	1	1	1	1	0	0	1	1	0	0	1	1	0	1	0	0	1	0	0	1
Multiple_sclerosis	rs12132298-A	rs296520	chr1	200880978	0.0714	missense	C1orf106	none	NA	Duodenum_mucosa	1	0	0	1	1	1	1	0	0	0	0	0	0	0	1	0	0	0	0	0	0	0	1	1	1	0	0	0	0	0	0	0	0
Multiple_sclerosis	rs12132298-A	rs35730213	chr1	200874229	0.0639	none	C1orf106	none	NA	Duodenum_mucosa	0	0	0	0	0	0	0	1	1	0	1	1	0	1	1	1	1	0	0	1	1	0	0	1	1	0	1	0	0	1	0	0	1
Multiple_sclerosis	rs12132298-A	rs7522462	chr1	200881595	0.062	none	C1orf106	none	NA	Duodenum_mucosa	1	0	0	1	1	1	1	0	0	0	0	0	0	0	1	0	0	0	0	0	0	0	1	1	1	0	0	0	0	0	0	0	0
Multiple_sclerosis	rs12132298-A	rs41299637	chr1	200877850	0.0595	none	C1orf106	none	NA	colonic_mucosa	0	0	0	0	0	0	0	0	0	0	0	1	1	0	0	0	0	0	0	1	0	0	1	1	1	0	1	0	0	1	1	0	0
Multiple_sclerosis	rs12132298-A	rs7554511	chr1	200877562	0.0487	none	C1orf106	none	NA	colonic_mucosa	0	0	0	0	0	0	0	0	0	0	0	1	0	1	1	0	1	1	0	1	0	0	1	1	1	0	1	0	0	1	1	0	0
Multiple_sclerosis	rs12027964-A	rs12027964	chr1	206803645	0.1464	none	none	none	NA	none	0	0	0	0	0	0	0	0	0	0	0	0	0	0	0	0	0	0	0	0	0	0	0	0	0	0	0	0	0	0	0	0	0
Multiple_sclerosis	rs12027964-A	rs10157569	chr1	206801947	0.1464	none	none	none	NA	none	0	0	0	0	0	0	0	0	0	0	0	0	0	0	0	0	0	0	0	0	0	0	0	0	0	0	0	0	0	0	0	0	0
Multiple_sclerosis	rs12027964-A	rs11577685	chr1	206802184	0.1464	none	none	none	NA	none	0	0	0	0	0	0	0	0	0	0	0	0	0	0	0	0	0	0	0	0	0	0	0	0	0	0	0	0	0	0	0	0	0
Multiple_sclerosis	rs12027964-A	rs10746416	chr1	206795058	0.0991	none	none	none	NA	none	0	0	0	0	0	0	0	0	0	0	0	0	0	0	0	0	0	0	0	0	0	0	0	0	0	0	0	0	0	0	0	0	0
Multiple_sclerosis	rs12027964-A	rs12049220	chr1	206797762	0.0991	none	none	none	NA	none	0	0	0	0	0	0	0	0	0	0	0	0	0	0	0	0	0	0	0	0	0	0	0	0	0	0	0	0	0	0	0	0	0
Multiple_sclerosis	rs12027964-A	rs12407425	chr1	206835621	0.0483	none	DYRK3	none	NA	Th1	0	1	0	1	0	0	1	1	0	0	0	0	1	1	1	0	0	0	0	1	1	0	1	0	0	0	0	0	1	1	0	0	0
Multiple_sclerosis	rs12027964-A	rs11119281	chr1	206846263	0.0302	none	DYRK3	none	NA	K562	1	1	0	0	1	1	1	1	1	1	1	0	1	1	0	0	1	1	1	1	1	1	1	1	1	1	0	1	1	1	1	1	1
Multiple_sclerosis	rs12027964-A	rs12034739	chr1	206830925	0.0276	none	DYRK3	none	NA	Duodenum_mucosa	1	0	1	1	0	1	1	1	1	0	0	1	1	0	0	0	1	0	1	0	1	1	1	1	1	1	0	1	1	1	1	0	0
Multiple_sclerosis	rs2163226-A	rs2163226	chr2	43361256	0.3613	none	none	none	NA	Th0	1	1	1	1	1	1	1	1	1	1	1	1	1	1	1	1	1	1	1	1	1	1	0	1	1	1	1	1	1	1	1	0	0
Multiple_sclerosis	rs2163226-A	rs17030410	chr2	43356490	0.0451	none	none	none	NA	adult_CD14	1	1	1	1	1	1	1	1	1	1	1	1	1	1	1	1	1	1	1	1	1	1	1	1	1	1	1	1	1	1	1	0	0
Multiple_sclerosis	rs2163226-A	rs28498283	chr2	43360065	0.042	none	none	none	NA	Th0	1	1	1	1	1	1	1	1	1	1	1	1	1	1	1	1	1	1	1	1	1	1	1	1	1	1	1	1	1	1	0	0	0
Multiple_sclerosis	rs2163226-A	rs62135412	chr2	43361389	0.0414	none	none	none	NA	Th0	1	0	1	1	1	1	1	1	1	1	1	1	1	1	1	1	1	1	1	1	1	1	0	1	1	0	1	1	1	1	0	0	0
Multiple_sclerosis	rs2163226-A	rs6705577	chr2	43359275	0.0409	none	none	none	NA	Th0	1	1	1	1	1	1	1	1	1	1	1	1	1	1	1	1	1	1	1	1	1	1	1	1	1	1	1	1	1	1	1	1	1
Multiple_sclerosis	rs2163226-A	rs747709	chr2	43353389	0.0396	none	none	none	NA	adult_CD14	1	1	1	1	1	1	1	1	1	1	1	1	1	1	1	1	0	1	1	0	0	1	0	1	1	0	1	0	0	1	0	0	0
Multiple_sclerosis	rs2163226-A	rs28411734	chr2	43355519	0.0358	none	none	none	NA	adult_CD14	1	1	1	1	1	1	1	1	1	1	1	1	1	1	1	1	1	1	1	0	1	1	1	1	1	1	1	1	1	1	0	0	0
Multiple_sclerosis	rs2163226-A	rs62135410	chr2	43358009	0.0321	none	none	none	NA	CD45RA_CD8	1	1	1	1	1	1	1	1	1	1	1	1	1	1	1	1	1	1	1	1	1	1	1	1	1	1	1	1	1	1	1	1	0
Multiple_sclerosis	rs2163226-A	rs17030394	chr2	43354280	0.0319	none	none	none	NA	adult_CD14	1	1	1	1	1	1	1	1	1	1	1	1	1	1	1	1	0	1	1	0	0	1	0	1	1	0	1	0	0	1	0	0	0
Multiple_sclerosis	rs2163226-A	rs12328347	chr2	43351269	0.0318	none	none	none	NA	none	0	0	0	0	0	0	0	0	0	0	0	0	0	0	0	0	0	0	0	0	0	0	0	0	0	0	0	0	0	0	0	0	0
Multiple_sclerosis	rs2163226-A	rs6746891	chr2	43346511	0.0292	none	none	none	NA	none	0	0	0	0	0	0	0	0	0	0	0	0	0	0	0	0	0	0	0	0	0	0	0	0	0	0	0	0	0	0	0	0	0
Multiple_sclerosis	rs2163226-A	rs12471190	chr2	43359127	0.0278	none	none	none	NA	Th0	1	1	1	1	1	1	1	1	1	1	1	1	1	1	1	1	1	1	1	1	1	1	1	1	1	1	1	1	1	1	1	1	1
Multiple_sclerosis	rs1177205-A	rs1177205	chr2	61075111	0.0973	noncoding	FLJ16341	none	NA	none	0	0	0	0	0	0	0	0	0	0	0	0	0	0	0	0	0	0	0	0	0	0	0	0	0	0	0	0	0	0	0	0	0
Multiple_sclerosis	rs1177205-A	rs1306395	chr2	61076272	0.0655	noncoding	FLJ16341	none	NA	none	0	0	0	0	0	0	0	0	0	0	0	0	0	0	0	0	0	0	0	0	0	0	0	0	0	0	0	0	0	0	0	0	0
Multiple_sclerosis	rs1177205-A	rs1177206	chr2	61075189	0.0556	noncoding	FLJ16341	none	NA	none	0	0	0	0	0	0	0	0	0	0	0	0	0	0	0	0	0	0	0	0	0	0	0	0	0	0	0	0	0	0	0	0	0
Multiple_sclerosis	rs1177205-A	rs750026	chr2	61075765	0.0489	noncoding	FLJ16341	none	NA	none	0	0	0	0	0	0	0	0	0	0	0	0	0	0	0	0	0	0	0	0	0	0	0	0	0	0	0	0	0	0	0	0	0
Multiple_sclerosis	rs1177205-A	rs750027	chr2	61075987	0.0489	noncoding	FLJ16341	none	NA	none	0	0	0	0	0	0	0	0	0	0	0	0	0	0	0	0	0	0	0	0	0	0	0	0	0	0	0	0	0	0	0	0	0
Multiple_sclerosis	rs1177205-A	rs842627	chr2	61082660	0.0397	none	FLJ16341	none	NA	none	0	0	0	0	0	0	0	0	0	0	0	0	0	0	0	0	0	0	0	0	0	0	0	0	0	0	0	0	0	0	0	0	0
Multiple_sclerosis	rs1177205-A	rs1177202	chr2	61074576	0.0363	none	none	none	NA	none	0	0	0	0	0	0	0	0	0	0	0	0	0	0	0	0	0	0	0	0	0	0	0	0	0	0	0	0	0	0	0	0	0
Multiple_sclerosis	rs1177205-A	rs842638	chr2	61092678	0.0362	none	FLJ16341	none	NA	none	0	0	0	0	0	0	0	0	0	0	0	0	0	0	0	0	0	0	0	0	0	0	0	0	0	0	0	0	0	0	0	0	0
Multiple_sclerosis	rs1177205-A	rs35194171	chr2	61072183	0.0307	none	none	none	NA	B_Cell_Centroblast	0	0	0	0	0	0	0	1	0	0	1	0	1	1	1	0	0	1	1	1	1	0	1	0	0	0	0	0	0	0	0	0	0
Multiple_sclerosis	rs1177205-A	rs1177213	chr2	61079090	0.0306	none	FLJ16341	none	NA	none	0	0	0	0	0	0	0	0	0	0	0	0	0	0	0	0	0	0	0	0	0	0	0	0	0	0	0	0	0	0	0	0	0
Multiple_sclerosis	rs1177205-A	rs842631	chr2	61085723	0.0293	none	FLJ16341	none	NA	none	0	0	0	0	0	0	0	0	0	0	0	0	0	0	0	0	0	0	0	0	0	0	0	0	0	0	0	0	0	0	0	0	0
Multiple_sclerosis	rs1177205-A	rs1177211	chr2	61078350	0.0288	none	FLJ16341	none	NA	none	0	0	0	0	0	0	0	0	0	0	0	0	0	0	0	0	0	0	0	0	0	0	0	0	0	0	0	0	0	0	0	0	0
Multiple_sclerosis	rs7595717-A	rs7595717	chr2	68587477	0.146	none	none	none	NA	none	0	0	0	0	0	0	0	0	0	0	0	0	0	0	0	0	0	0	0	0	0	0	0	0	0	0	0	0	0	0	0	0	0
Multiple_sclerosis	rs7595717-A	rs2289688	chr2	68620463	0.0698	none	PLEK	none	NA	GM12878	1	1	1	1	0	0	0	0	1	0	1	0	0	0	0	1	1	1	1	1	0	1	1	0	0	0	0	0	0	0	0	0	0
Multiple_sclerosis	rs7595717-A	rs28579677	chr2	68589118	0.0663	none	none	none	NA	GM12878	0	0	0	0	1	0	0	1	1	1	1	0	1	1	1	1	1	1	1	1	1	1	1	1	1	1	0	1	0	1	1	0	0
Multiple_sclerosis	rs7595717-A	rs17035355	chr2	68589322	0.0593	none	none	none	NA	GM12878	0	0	0	0	1	0	0	1	1	1	1	0	1	1	1	1	1	1	1	1	1	1	1	1	1	1	0	1	0	1	1	0	0
Multiple_sclerosis	rs7595717-A	rs4671914	chr2	68612292	0.0401	none	PLEK	none	NA	GM12878	1	1	1	1	0	0	0	1	1	0	1	0	1	0	0	0	1	1	1	1	1	1	1	1	1	1	0	1	1	0	0	0	0
Multiple_sclerosis	rs7595717-A	rs17035374	chr2	68596501	0.039	none	PLEK	none	NA	B_Cell_Centroblast	1	1	1	1	0	1	1	0	1	1	0	0	0	0	0	1	1	1	1	1	1	1	0	1	1	1	0	1	0	0	0	1	1
Multiple_sclerosis	rs7595717-A	rs2289689	chr2	68620151	0.0349	none	PLEK	none	NA	adult_CD14	1	1	1	1	0	0	0	0	1	0	0	0	0	0	0	1	0	1	1	1	0	1	0	0	0	1	1	1	0	0	0	0	0
Multiple_sclerosis	rs7595717-A	rs76599595	chr2	68597107	0.0327	none	PLEK	none	NA	B_Cell_Centroblast	1	1	1	1	0	1	1	0	1	1	0	0	0	0	0	1	1	1	1	1	1	1	0	1	1	1	0	1	0	0	0	1	1
Multiple_sclerosis	rs7595717-A	rs1373199	chr2	68595680	0.028	none	PLEK	none	NA	adult_CD14	1	1	1	1	1	1	1	0	1	1	1	0	0	1	1	1	1	1	1	1	1	1	1	1	1	1	0	1	1	1	1	1	1
Multiple_sclerosis	rs9967792-G	rs9967792	chr2	191974435	0.0422	none	STAT4	none	NA	chondrogenic_dif_cells	1	1	1	0	0	0	0	1	1	1	1	1	1	1	1	1	1	0	0	0	0	0	0	0	0	0	0	0	0	0	0	1	1
Multiple_sclerosis	rs9967792-G	rs4073699	chr2	191979359	0.0298	none	STAT4	none	NA	CD25-_IL17-_Th_stim_MACS	1	1	1	0	0	0	0	1	1	1	1	1	1	1	1	1	1	1	1	1	0	0	0	1	0	1	0	1	0	1	0	1	1
Multiple_sclerosis	rs9967792-G	rs4254532	chr2	191979178	0.0279	none	STAT4	none	NA	CD25-_IL17-_Th_stim_MACS	1	1	1	0	0	0	0	1	1	1	1	1	1	1	1	1	1	1	1	1	0	0	0	1	0	1	0	1	0	1	0	1	1
Multiple_sclerosis	rs9967792-G	rs4853542	chr2	191976602	0.0277	none	STAT4	none	NA	chondrogenic_dif_cells	1	1	1	0	0	0	0	1	1	1	1	1	1	1	1	1	1	0	0	0	0	0	0	0	1	0	0	0	0	0	0	0	1
Multiple_sclerosis	rs9967792-G	rs4341967	chr2	191984286	0.0277	none	STAT4	none	NA	none	0	0	0	0	0	0	0	0	0	0	0	0	0	0	0	0	0	0	0	0	0	0	0	0	0	0	0	0	0	0	0	0	0
Multiple_sclerosis	rs9967792-G	rs7579720	chr2	191986673	0.0277	none	STAT4	none	NA	none	0	0	0	0	0	0	0	0	0	0	0	0	0	0	0	0	0	0	0	0	0	0	0	0	0	0	0	0	0	0	0	0	0
Multiple_sclerosis	rs9967792-G	rs10931482	chr2	191988629	0.0277	none	STAT4	none	NA	none	0	0	0	0	0	0	0	0	0	0	0	0	0	0	0	0	0	0	0	0	0	0	0	0	0	0	0	0	0	0	0	0	0
Multiple_sclerosis	rs9967792-G	rs72349564	chr2	191988799	0.0277	none	STAT4	none	NA	none	0	0	0	0	0	0	0	0	0	0	0	0	0	0	0	0	0	0	0	0	0	0	0	0	0	0	0	0	0	0	0	0	0
Multiple_sclerosis	rs9967792-G	rs4549119	chr2	191990362	0.0277	none	STAT4	none	NA	none	0	0	0	0	0	0	0	0	0	0	0	0	0	0	0	0	0	0	0	0	0	0	0	0	0	0	0	0	0	0	0	0	0
Multiple_sclerosis	rs9967792-G	rs4602251	chr2	191991665	0.0277	none	STAT4	none	NA	CD45RO_CD8	0	1	1	0	0	0	0	1	1	1	1	1	1	1	1	1	1	0	1	1	0	0	0	0	0	0	0	1	1	0	0	0	0
Multiple_sclerosis	rs6435203-A	rs6435203	chr2	204611195	0.1112	none	none	none	NA	Th2	0	0	0	0	0	0	0	1	1	1	1	1	1	1	1	0	0	0	0	1	1	0	0	1	0	0	1	0	0	0	1	1	0
Multiple_sclerosis	rs6435203-A	rs10186048	chr2	204624056	0.0516	none	none	none	NA	NH-Osteoblast	0	0	0	0	0	0	0	0	0	0	1	1	1	1	1	0	1	1	0	0	0	0	0	0	1	0	1	0	0	0	1	1	1
Multiple_sclerosis	rs6435203-A	rs11571321	chr2	204621634	0.0469	none	none	none	NA	none	0	0	0	0	0	0	0	0	0	0	0	0	0	0	0	0	0	0	0	0	0	0	0	0	0	0	0	0	0	0	0	0	0
Multiple_sclerosis	rs6435203-A	rs2352407	chr2	204623245	0.0469	none	none	none	NA	NH-Osteoblast	0	0	0	0	0	0	0	1	1	1	1	1	1	1	1	1	1	0	0	0	1	0	0	0	1	0	0	0	0	0	1	1	1
Multiple_sclerosis	rs6435203-A	rs1961361	chr2	204619397	0.043	none	none	none	NA	none	0	0	0	0	0	0	0	0	0	0	0	0	0	0	0	0	0	0	0	0	0	0	0	0	0	0	0	0	0	0	0	0	0
Multiple_sclerosis	rs6435203-A	rs231385	chr2	204621491	0.043	none	none	none	NA	none	0	0	0	0	0	0	0	0	0	0	0	0	0	0	0	0	0	0	0	0	0	0	0	0	0	0	0	0	0	0	0	0	0
Multiple_sclerosis	rs6435203-A	rs10179483	chr2	204652264	0.0355	none	none	none	NA	HSMM-myotube	1	1	1	1	1	1	1	1	1	1	0	0	1	1	1	1	0	1	1	0	0	0	0	1	1	1	1	1	1	1	1	1	1
Multiple_sclerosis	rs6435203-A	rs13035157	chr2	204606632	0.0282	none	none	none	NA	Th2	0	0	0	0	0	0	0	1	1	1	1	1	1	1	1	1	1	0	0	0	0	0	0	0	1	0	1	0	0	0	1	1	1
Multiple_sclerosis	rs9989735-C	rs9989735	chr2	231115454	0.1281	none	SP140	none	NA	none	0	0	0	0	0	0	0	0	0	0	0	0	0	0	0	0	0	0	0	0	0	0	0	0	0	0	0	0	0	0	0	0	0
Multiple_sclerosis	rs9989735-C	rs9989899	chr2	231114131	0.1281	none	SP140	none	NA	none	0	0	0	0	0	0	0	0	0	0	0	0	0	0	0	0	0	0	0	0	0	0	0	0	0	0	0	0	0	0	0	0	0
Multiple_sclerosis	rs9989735-C	rs35857956	chr2	231114995	0.1281	none	SP140	none	NA	none	0	0	0	0	0	0	0	0	0	0	0	0	0	0	0	0	0	0	0	0	0	0	0	0	0	0	0	0	0	0	0	0	0
Multiple_sclerosis	rs9989735-C	rs10498246	chr2	231116417	0.1281	none	SP140	none	NA	none	0	0	0	0	0	0	0	0	0	0	0	0	0	0	0	0	0	0	0	0	0	0	0	0	0	0	0	0	0	0	0	0	0
Multiple_sclerosis	rs9989735-C	rs7423615	chr2	231116874	0.1281	none	SP140	none	NA	none	0	0	0	0	0	0	0	0	0	0	0	0	0	0	0	0	0	0	0	0	0	0	0	0	0	0	0	0	0	0	0	0	0
Multiple_sclerosis	rs9989735-C	rs7563433	chr2	231095678	0.042	none	SP140	SP140	+	adult_CD20	0	0	0	0	0	0	0	0	1	1	1	1	0	1	1	1	0	0	1	1	1	0	0	0	0	0	1	0	0	0	0	1	0
Multiple_sclerosis	rs9989735-C	rs7557418	chr2	231098071	0.042	none	SP140	SP140	+	B_Cell_Centroblast	0	0	0	0	0	0	0	1	1	1	1	1	1	1	0	1	0	0	1	1	1	0	0	0	0	0	0	0	0	0	0	0	0
Multiple_sclerosis	rs9989735-C	rs6743984	chr2	231109329	0.0328	none	SP140	none	NA	none	0	0	0	0	0	0	0	0	0	0	0	0	0	0	0	0	0	0	0	0	0	0	0	0	0	0	0	0	0	0	0	0	0
Multiple_sclerosis	rs11719975-C	rs11719975	chr3	18785585	0.0609	none	none	none	NA	Th2	0	0	0	0	0	0	0	1	1	1	1	1	1	1	1	1	1	1	0	0	0	0	0	0	0	0	0	0	0	0	0	0	0
Multiple_sclerosis	rs11719975-C	rs10662289	chr3	18776917	0.0609	none	none	none	NA	none	0	0	0	0	0	0	0	0	0	0	0	0	0	0	0	0	0	0	0	0	0	0	0	0	0	0	0	0	0	0	0	0	0
Multiple_sclerosis	rs11719975-C	rs4613476	chr3	18777214	0.0609	none	none	none	NA	Th0	0	0	0	0	0	0	0	0	1	1	1	0	1	1	1	1	1	0	1	0	0	0	0	0	0	0	0	0	0	0	0	0	0
Multiple_sclerosis	rs11719975-C	rs28566044	chr3	18779479	0.0609	none	none	none	NA	Th2	0	0	0	0	0	0	0	1	1	1	1	1	1	1	1	1	0	0	1	0	0	1	0	0	0	0	0	0	0	0	0	0	0
Multiple_sclerosis	rs11719975-C	rs4622913	chr3	18788067	0.0609	none	none	none	NA	adult_CD14	0	0	0	0	0	0	0	1	1	1	1	1	1	1	1	1	1	1	1	1	1	1	0	0	0	0	0	1	0	1	0	0	0
Multiple_sclerosis	rs11719975-C	rs34894594	chr3	18792004	0.0609	none	none	none	NA	none	0	0	0	0	0	0	0	0	0	0	0	0	0	0	0	0	0	0	0	0	0	0	0	0	0	0	0	0	0	0	0	0	0
Multiple_sclerosis	rs11719975-C	rs7640522	chr3	18776585	0.0336	none	none	none	NA	none	0	0	0	0	0	0	0	0	0	0	0	0	0	0	0	0	0	0	0	0	0	0	0	0	0	0	0	0	0	0	0	0	0
Multiple_sclerosis	rs11719975-C	rs57793342	chr3	18781770	0.0336	none	none	none	NA	Th2	0	0	0	0	0	0	0	1	1	1	1	1	1	1	1	1	1	1	1	1	1	0	0	1	1	1	0	1	0	1	0	0	0
Multiple_sclerosis	rs11719975-C	rs35117636	chr3	18785388	0.0336	none	none	none	NA	Th2	0	0	0	0	0	0	0	1	1	1	1	1	1	1	1	1	1	1	0	0	0	0	0	0	0	0	0	0	0	0	0	0	0
Multiple_sclerosis	rs11719975-C	rs140385735	chr3	18798897	0.0336	none	none	none	NA	Th2	0	0	0	0	0	0	0	1	1	1	1	1	1	1	1	1	0	0	1	0	1	0	0	1	0	0	0	0	0	0	0	0	0
Multiple_sclerosis	rs11719975-C	rs4130128	chr3	18797022	0.0292	none	none	none	NA	Th2	0	0	0	0	0	0	0	1	1	1	1	1	1	1	1	1	1	0	1	0	0	0	0	1	1	0	0	0	0	0	0	0	0
Multiple_sclerosis	rs1813375-A	rs1813375	chr3	28078571	0.1398	none	none	none	NA	GM12878	0	0	0	0	0	0	0	0	0	0	0	0	0	1	1	0	0	0	0	1	0	0	0	0	0	0	0	0	0	0	0	0	0
Multiple_sclerosis	rs1813375-A	rs173082	chr3	28078932	0.0891	none	none	none	NA	GM12878	0	0	0	0	0	0	0	0	0	0	0	0	0	1	1	0	0	0	0	1	0	0	0	0	0	0	0	0	0	0	0	0	0
Multiple_sclerosis	rs1813375-A	rs338611	chr3	28078979	0.0891	none	none	none	NA	GM12878	0	0	0	0	0	0	0	0	0	0	0	0	0	1	1	0	0	0	0	1	0	0	0	0	0	0	0	0	0	0	0	0	0
Multiple_sclerosis	rs1813375-A	rs170934	chr3	28079085	0.0876	none	none	none	NA	GM12878	0	0	0	0	0	0	0	0	0	0	0	0	0	1	1	0	0	0	0	1	0	0	0	0	0	0	0	0	0	0	0	0	0
Multiple_sclerosis	rs1813375-A	rs338603	chr3	28068394	0.0635	none	none	none	NA	none	0	0	0	0	0	0	0	0	0	0	0	0	0	0	0	0	0	0	0	0	0	0	0	0	0	0	0	0	0	0	0	0	0
Multiple_sclerosis	rs1813375-A	rs432888	chr3	28072443	0.0635	none	none	none	NA	none	0	0	0	0	0	0	0	0	0	0	0	0	0	0	0	0	0	0	0	0	0	0	0	0	0	0	0	0	0	0	0	0	0
Multiple_sclerosis	rs1813375-A	rs427289	chr3	28073021	0.0635	none	none	none	NA	none	0	0	0	0	0	0	0	0	0	0	0	0	0	0	0	0	0	0	0	0	0	0	0	0	0	0	0	0	0	0	0	0	0
Multiple_sclerosis	rs1813375-A	rs398390	chr3	28074673	0.0635	none	none	none	NA	none	0	0	0	0	0	0	0	0	0	0	0	0	0	0	0	0	0	0	0	0	0	0	0	0	0	0	0	0	0	0	0	0	0
Multiple_sclerosis	rs1813375-A	rs819991	chr3	28075170	0.0635	none	none	none	NA	none	0	0	0	0	0	0	0	0	0	0	0	0	0	0	0	0	0	0	0	0	0	0	0	0	0	0	0	0	0	0	0	0	0
Multiple_sclerosis	rs1813375-A	rs388368	chr3	28076257	0.0635	none	none	none	NA	none	0	0	0	0	0	0	0	0	0	0	0	0	0	0	0	0	0	0	0	0	0	0	0	0	0	0	0	0	0	0	0	0	0
Multiple_sclerosis	rs1813375-A	rs669607	chr3	28071444	0.0544	none	none	none	NA	none	0	0	0	0	0	0	0	0	0	0	0	0	0	0	0	0	0	0	0	0	0	0	0	0	0	0	0	0	0	0	0	0	0
Multiple_sclerosis	rs1813375-A	rs413544	chr3	28074084	0.05	none	none	none	NA	none	0	0	0	0	0	0	0	0	0	0	0	0	0	0	0	0	0	0	0	0	0	0	0	0	0	0	0	0	0	0	0	0	0
Multiple_sclerosis	rs1813375-A	rs388448	chr3	28075627	0.05	none	none	none	NA	none	0	0	0	0	0	0	0	0	0	0	0	0	0	0	0	0	0	0	0	0	0	0	0	0	0	0	0	0	0	0	0	0	0
Multiple_sclerosis	rs1813375-A	rs427221	chr3	28075985	0.0463	none	none	none	NA	none	0	0	0	0	0	0	0	0	0	0	0	0	0	0	0	0	0	0	0	0	0	0	0	0	0	0	0	0	0	0	0	0	0
Multiple_sclerosis	rs116135711-G	rs116135711	chr3	33072469	0.8461	none	GLB1	none	NA	CD25+_CD127-_Treg	0	0	0	0	0	0	0	0	1	1	1	1	1	1	1	1	1	1	1	1	1	1	1	0	0	0	1	0	0	0	1	0	0
Multiple_sclerosis	rs1131265-C	rs1131265	chr3	119222456	0.5061	synonymous	TIMMDC1	none	NA	none	0	0	0	0	0	0	0	0	0	0	0	0	0	0	0	0	0	0	0	0	0	0	0	0	0	0	0	0	0	0	0	0	0
Multiple_sclerosis	rs1131265-C	rs35264490	chr3	119238753	0.1325	none	TIMMDC1	none	NA	B_Cell_Centroblast	0	0	0	0	0	0	0	1	1	1	1	1	0	0	0	1	1	1	1	1	1	0	0	0	0	0	0	0	0	0	0	0	0
Multiple_sclerosis	rs1131265-C	rs57271503	chr3	119244593	0.0773	utr3	CD80	none	NA	adult_CD20	0	0	0	1	0	0	0	1	1	1	1	1	0	1	0	1	0	1	1	1	0	1	1	0	0	1	1	0	1	1	1	1	1
Multiple_sclerosis	rs1131265-C	rs9843355	chr3	119228508	0.0635	none	TIMMDC1	none	NA	CD25-_IL17+_Th17_stim	0	0	0	0	0	0	0	1	0	1	1	1	1	1	0	1	1	0	1	1	1	1	0	0	0	0	1	0	0	0	0	0	0
Multiple_sclerosis	rs1131265-C	rs62264485	chr3	119237798	0.0515	none	TIMMDC1	none	NA	B_Cell_Centroblast	0	0	0	0	0	0	0	0	0	1	1	1	0	1	0	1	1	1	1	1	1	0	0	0	0	0	0	0	0	0	0	0	0
Multiple_sclerosis	rs1131265-C	rs13092998	chr3	119245044	0.0443	none	CD80	none	NA	adult_CD20	0	0	0	1	0	0	0	1	1	1	1	1	0	1	0	1	0	1	1	1	0	1	1	0	0	1	1	0	1	1	1	1	1
Multiple_sclerosis	rs1131265-C	rs2293370	chr3	119219934	0.0352	none	TIMMDC1	none	NA	K562	0	0	0	0	1	0	0	1	1	1	1	1	0	0	1	1	1	1	1	1	0	1	1	0	0	1	1	1	1	1	1	1	1
Multiple_sclerosis	rs1131265-C	rs3830649	chr3	119246385	0.0336	none	CD80	none	NA	none	0	0	0	0	0	0	0	0	0	0	0	0	0	0	0	0	0	0	0	0	0	0	0	0	0	0	0	0	0	0	0	0	0
Multiple_sclerosis	rs1014486-G	rs1014486	chr3	159691112	0.9079	none	AK097161	none	NA	none	0	0	0	0	0	0	0	0	0	0	0	0	0	0	0	0	0	0	0	0	0	0	0	0	0	0	0	0	0	0	0	0	0
Multiple_sclerosis	rs564976-A	rs564976	chr3	159729059	0.0442	none	AK097161	none	NA	GM12878	0	0	0	0	0	0	0	0	0	1	0	0	1	1	1	0	1	1	1	1	1	1	1	1	0	0	0	0	0	0	1	0	0
Multiple_sclerosis	rs564976-A	rs564799	chr3	159728987	0.0442	none	AK097161	none	NA	GM12878	0	0	0	0	0	0	0	0	0	1	0	0	1	1	1	0	1	1	1	1	1	1	1	1	0	0	0	0	0	0	1	0	0
Multiple_sclerosis	rs564976-A	rs485789	chr3	159730148	0.0348	none	AK097161	none	NA	GM12878	0	0	0	0	0	0	0	1	0	1	0	0	1	1	1	0	0	1	1	1	1	1	0	1	0	0	0	0	0	0	0	0	0
Multiple_sclerosis	rs564976-A	rs589446	chr3	159733527	0.0314	none	AK097161	none	NA	none	0	0	0	0	0	0	0	0	0	0	0	0	0	0	0	0	0	0	0	0	0	0	0	0	0	0	0	0	0	0	0	0	0
Multiple_sclerosis	rs10063294-G	rs10063294	chr5	35877505	0.2064	none	none	none	NA	CD25-_IL17-_Th_stim_MACS	0	0	0	0	0	0	0	1	1	1	1	1	1	1	1	1	0	0	0	1	0	1	0	0	1	1	0	0	0	0	1	1	1
Multiple_sclerosis	rs10063294-G	rs987106	chr5	35875593	0.1391	none	IL7R	none	NA	CD45RA_CD8	0	0	0	0	0	0	0	1	1	1	1	1	1	1	1	1	1	0	0	1	0	1	0	0	0	0	0	0	0	0	0	0	0
Multiple_sclerosis	rs10063294-G	rs6881706	chr5	35879156	0.0384	none	none	none	NA	CD25-_IL17-_Th_stim_MACS	0	0	0	0	0	0	0	1	1	1	1	1	1	1	1	1	1	0	0	0	0	1	0	0	0	0	0	0	0	0	1	0	0
Multiple_sclerosis	rs10063294-G	rs7717955	chr5	35862841	0.0381	none	IL7R	none	NA	CD25-_IL17-_Th_stim_MACS	0	0	0	0	0	0	0	1	1	1	1	1	1	1	1	1	1	0	1	1	0	0	0	1	1	0	0	1	0	1	0	1	1
Multiple_sclerosis	rs10063294-G	rs142376788	chr5	35852887	0.0379	none	none	none	NA	CD25-_IL17-_Th_stim_MACS	0	0	0	0	0	0	0	1	1	1	1	1	1	1	1	1	1	1	1	1	0	1	0	1	1	0	0	1	0	1	1	1	1
Multiple_sclerosis	rs10063294-G	rs11742240	chr5	35881376	0.0357	none	none	none	NA	CD25-_IL17-_Th_stim_MACS	0	0	0	0	0	0	0	1	1	1	1	1	1	1	1	1	1	1	0	0	0	0	0	0	1	0	0	0	0	0	0	0	0
Multiple_sclerosis	rs10063294-G	rs11567694	chr5	35857704	0.0355	none	IL7R	none	NA	CD25-_IL17-_Th_stim_MACS	0	1	0	0	0	0	0	1	1	1	1	1	1	1	1	1	1	1	1	1	0	1	0	1	1	0	0	1	1	1	1	1	1
Multiple_sclerosis	rs10063294-G	rs11567705	chr5	35861152	0.0345	none	IL7R	none	NA	CD25-_IL17-_Th_stim_MACS	0	0	0	0	0	0	0	1	1	1	1	1	1	1	1	1	1	0	1	1	0	0	0	1	1	1	1	0	0	1	1	1	1
Multiple_sclerosis	rs10063294-G	rs11742270	chr5	35881443	0.0322	none	none	none	NA	CD25-_IL17-_Th_stim_MACS	0	0	0	0	0	0	0	1	1	1	1	1	1	1	1	1	1	1	0	0	0	0	0	0	1	0	0	0	0	0	0	0	0
Multiple_sclerosis	rs10063294-G	rs6897932	chr5	35874575	0.0308	missense	IL7R	none	NA	CD25-_IL17-_Th_stim_MACS	0	0	0	0	0	0	0	1	1	1	1	1	1	1	1	1	0	0	1	0	0	1	0	0	0	0	0	0	0	0	0	1	0
Multiple_sclerosis	rs6880778-G	rs6880778	chr5	40399096	0.0394	none	none	none	NA	none	0	0	0	0	0	0	0	0	0	0	0	0	0	0	0	0	0	0	0	0	0	0	0	0	0	0	0	0	0	0	0	0	0
Multiple_sclerosis	rs71624119-G	rs71624119	chr5	55440730	0.3102	none	ANKRD55	none	NA	CD25-_CD45RA+_naive	0	0	0	0	1	0	0	1	1	1	1	0	1	1	1	1	1	1	0	1	0	0	1	1	0	0	1	1	0	1	0	0	0
Multiple_sclerosis	rs71624119-G	rs10213692	chr5	55442249	0.3102	none	ANKRD55	none	NA	none	0	0	0	0	0	0	0	0	0	0	0	0	0	0	0	0	0	0	0	0	0	0	0	0	0	0	0	0	0	0	0	0	0
Multiple_sclerosis	rs71624119-G	rs10065637	chr5	55438851	0.2991	none	ANKRD55	none	NA	Th1	0	1	0	1	0	0	0	1	1	1	1	1	1	1	1	1	0	0	1	1	1	0	0	1	1	0	1	1	1	1	0	0	0
Multiple_sclerosis	rs71624119-G	rs6873385	chr5	55436851	0.0421	none	ANKRD55	none	NA	none	0	0	0	0	0	0	0	0	0	0	0	0	0	0	0	0	0	0	0	0	0	0	0	0	0	0	0	0	0	0	0	0	0
Multiple_sclerosis	rs71624119-G	rs6859219	chr5	55438580	0.0382	none	ANKRD55	none	NA	Th1	0	1	0	1	0	0	0	1	1	1	1	1	1	1	1	1	0	0	1	1	1	0	0	1	1	0	1	1	1	1	0	0	0
Multiple_sclerosis	rs72928038-A	rs72928038	chr6	90976768	0.3871	none	BACH2	none	NA	CD25-_CD45RA+_naive	0	0	0	0	0	0	0	1	1	1	1	1	1	1	1	1	1	0	1	0	1	0	0	1	0	0	0	0	0	0	1	0	0
Multiple_sclerosis	rs72928038-A	rs6454802	chr6	90814199	0.062	none	BACH2	none	NA	B_Cell_Centroblast	1	1	1	1	0	1	0	1	1	1	1	1	1	1	1	1	1	1	1	1	1	0	0	0	0	0	0	0	1	0	0	0	0
Multiple_sclerosis	rs72928038-A	rs7753008	chr6	90809639	0.0597	none	BACH2	none	NA	none	0	0	0	0	0	0	0	0	0	0	0	0	0	0	0	0	0	0	0	0	0	0	0	0	0	0	0	0	0	0	0	0	0
Multiple_sclerosis	rs72928038-A	rs10944479	chr6	90880393	0.0594	none	BACH2	none	NA	adult_CD20	0	0	0	0	0	0	0	1	0	1	1	1	1	1	0	1	0	0	1	0	1	0	0	0	0	0	0	0	0	0	1	0	0
Multiple_sclerosis	rs72928038-A	rs12202119	chr6	90815190	0.0529	none	BACH2	none	NA	adult_CD20	0	1	0	1	0	1	0	1	1	1	1	1	1	1	1	1	1	1	1	1	1	1	0	0	1	0	0	1	0	0	0	0	0
Multiple_sclerosis	rs72928038-A	rs62408204	chr6	90818874	0.0527	none	BACH2	none	NA	adult_CD20	1	0	0	0	0	0	0	1	1	0	1	1	1	1	1	1	1	1	1	0	1	0	0	0	1	0	0	0	0	1	0	0	0
Multiple_sclerosis	rs72928038-A	rs11753332	chr6	90819153	0.05	none	BACH2	none	NA	adult_CD20	1	0	0	0	0	0	0	1	1	0	1	1	1	1	1	1	1	1	1	0	1	0	0	0	1	0	0	0	0	1	0	0	0
Multiple_sclerosis	rs72928038-A	rs6908626	chr6	91005743	0.0317	none	BACH2	none	NA	CD25-_CD45RA+_naive	1	1	1	1	1	1	1	1	1	1	1	1	1	1	1	1	1	0	1	1	1	1	1	1	1	1	0	1	1	1	1	0	1
Multiple_sclerosis	rs212405-T	rs212405	chr6	159470559	0.2828	none	none	none	NA	none	0	0	0	0	0	0	0	0	0	0	0	0	0	0	0	0	0	0	0	0	0	0	0	0	0	0	0	0	0	0	0	0	0
Multiple_sclerosis	rs212405-T	rs212397	chr6	159474624	0.0984	none	none	none	NA	none	0	0	0	0	0	0	0	0	0	0	0	0	0	0	0	0	0	0	0	0	0	0	0	0	0	0	0	0	0	0	0	0	0
Multiple_sclerosis	rs212405-T	rs177055	chr6	159475270	0.0983	none	none	none	NA	adult_CD20	0	0	0	0	0	0	0	1	1	0	1	1	1	1	1	1	1	1	1	0	1	0	0	1	1	0	0	1	0	0	0	0	0
Multiple_sclerosis	rs212405-T	rs212407	chr6	159470417	0.0876	none	none	none	NA	none	0	0	0	0	0	0	0	0	0	0	0	0	0	0	0	0	0	0	0	0	0	0	0	0	0	0	0	0	0	0	0	0	0
Multiple_sclerosis	rs212405-T	rs212403	chr6	159472149	0.0874	none	none	none	NA	none	0	0	0	0	0	0	0	0	0	0	0	0	0	0	0	0	0	0	0	0	0	0	0	0	0	0	0	0	0	0	0	0	0
Multiple_sclerosis	rs212405-T	rs212402	chr6	159472295	0.0839	none	none	none	NA	none	0	0	0	0	0	0	0	0	0	0	0	0	0	0	0	0	0	0	0	0	0	0	0	0	0	0	0	0	0	0	0	0	0
Multiple_sclerosis	rs212405-T	rs212398	chr6	159474265	0.0737	none	none	none	NA	none	0	0	0	0	0	0	0	0	0	0	0	0	0	0	0	0	0	0	0	0	0	0	0	0	0	0	0	0	0	0	0	0	0
Multiple_sclerosis	rs212405-T	rs212400	chr6	159473574	0.058	none	none	none	NA	B_Cell_Centroblast	0	0	0	0	0	0	0	0	0	0	1	0	0	1	0	1	0	1	1	1	1	1	1	0	0	0	0	0	0	0	0	0	0
Multiple_sclerosis	rs212405-T	rs212399	chr6	159473761	0.0557	none	none	none	NA	B_Cell_Centroblast	0	0	0	0	0	0	0	0	0	0	1	0	0	1	0	1	0	1	1	1	1	1	1	0	0	0	0	0	0	0	0	0	0
Multiple_sclerosis	rs212405-T	rs212408	chr6	159470242	0.0556	none	none	none	NA	none	0	0	0	0	0	0	0	0	0	0	0	0	0	0	0	0	0	0	0	0	0	0	0	0	0	0	0	0	0	0	0	0	0
Multiple_sclerosis	rs706015-C	rs706015	chr7	27014988	0.1224	none	SKAP2	none	NA	none	0	0	0	0	0	0	0	0	0	0	0	0	0	0	0	0	0	0	0	0	0	0	0	0	0	0	0	0	0	0	0	0	0
Multiple_sclerosis	rs706015-C	rs2693661	chr7	27023064	0.1224	none	SKAP2	none	NA	none	0	0	0	0	0	0	0	0	0	0	0	0	0	0	0	0	0	0	0	0	0	0	0	0	0	0	0	0	0	0	0	0	0
Multiple_sclerosis	rs706015-C	rs10256866	chr7	27041151	0.0567	none	none	none	NA	none	0	0	0	0	0	0	0	0	0	0	0	0	0	0	0	0	0	0	0	0	0	0	0	0	0	0	0	0	0	0	0	0	0
Multiple_sclerosis	rs706015-C	rs774249	chr7	27014214	0.0476	none	SKAP2	none	NA	none	0	0	0	0	0	0	0	0	0	0	0	0	0	0	0	0	0	0	0	0	0	0	0	0	0	0	0	0	0	0	0	0	0
Multiple_sclerosis	rs706015-C	rs12700771	chr7	27030482	0.042	none	SKAP2	none	NA	chondrogenic_dif_cells	0	0	0	0	0	0	0	0	0	0	0	0	0	0	0	1	0	0	0	0	1	0	0	0	0	1	0	0	0	0	1	0	1
Multiple_sclerosis	rs706015-C	rs774245	chr7	26985815	0.0406	none	SKAP2	none	NA	none	0	0	0	0	0	0	0	0	0	0	0	0	0	0	0	0	0	0	0	0	0	0	0	0	0	0	0	0	0	0	0	0	0
Multiple_sclerosis	rs706015-C	rs2936424	chr7	26950206	0.0351	none	SKAP2	none	NA	none	0	0	0	0	0	0	0	0	0	0	0	0	0	0	0	0	0	0	0	0	0	0	0	0	0	0	0	0	0	0	0	0	0
Multiple_sclerosis	rs706015-C	rs2648079	chr7	26996402	0.0351	none	SKAP2	none	NA	none	0	0	0	0	0	0	0	0	0	0	0	0	0	0	0	0	0	0	0	0	0	0	0	0	0	0	0	0	0	0	0	0	0
Multiple_sclerosis	rs706015-C	rs2693669	chr7	27013863	0.0344	none	SKAP2	none	NA	none	0	0	0	0	0	0	0	0	0	0	0	0	0	0	0	0	0	0	0	0	0	0	0	0	0	0	0	0	0	0	0	0	0
Multiple_sclerosis	rs706015-C	rs2693660	chr7	27022420	0.0338	none	SKAP2	none	NA	none	0	0	0	0	0	0	0	0	0	0	0	0	0	0	0	0	0	0	0	0	0	0	0	0	0	0	0	0	0	0	0	0	0
Multiple_sclerosis	rs706015-C	rs774250	chr7	27015679	0.0336	none	SKAP2	none	NA	none	0	0	0	0	0	0	0	0	0	0	0	0	0	0	0	0	0	0	0	0	0	0	0	0	0	0	0	0	0	0	0	0	0
Multiple_sclerosis	rs706015-C	rs774253	chr7	27017870	0.0298	none	SKAP2	none	NA	none	0	0	0	0	0	0	0	0	0	0	0	0	0	0	0	0	0	0	0	0	0	0	0	0	0	0	0	0	0	0	0	0	0
Multiple_sclerosis	rs706015-C	rs954051	chr7	27023422	0.0296	none	SKAP2	none	NA	none	0	0	0	0	0	0	0	0	0	0	0	0	0	0	0	0	0	0	0	0	0	0	0	0	0	0	0	0	0	0	0	0	0
Multiple_sclerosis	rs706015-C	rs774251	chr7	27016449	0.0281	none	SKAP2	none	NA	none	0	0	0	0	0	0	0	0	0	0	0	0	0	0	0	0	0	0	0	0	0	0	0	0	0	0	0	0	0	0	0	0	0
Multiple_sclerosis	rs917116-C	rs917116	chr7	28172739	0.127	none	JAZF1	none	NA	chondrogenic_dif_cells	1	0	1	1	1	1	0	0	0	1	1	1	1	0	1	1	0	1	1	0	1	0	0	0	0	0	0	0	1	0	0	1	1
Multiple_sclerosis	rs917116-C	rs2189966	chr7	28172066	0.127	none	JAZF1	none	NA	chondrogenic_dif_cells	0	0	0	1	0	0	0	0	1	0	1	0	0	0	0	0	0	0	1	0	1	0	0	0	1	1	0	0	0	0	0	1	1
Multiple_sclerosis	rs917116-C	rs917115	chr7	28172586	0.1015	none	JAZF1	none	NA	chondrogenic_dif_cells	0	0	0	1	0	0	0	0	1	0	1	0	0	0	0	0	0	0	1	0	1	0	0	0	1	1	0	0	0	0	0	1	1
Multiple_sclerosis	rs917116-C	rs4722762	chr7	28178262	0.0622	none	JAZF1	none	NA	none	0	0	0	0	0	0	0	0	0	0	0	0	0	0	0	0	0	0	0	0	0	0	0	0	0	0	0	0	0	0	0	0	0
Multiple_sclerosis	rs917116-C	rs67250450	chr7	28174986	0.0405	none	JAZF1	none	NA	CD25+_CD127-_Treg	0	0	1	0	0	0	0	0	1	1	1	0	0	1	1	0	1	1	1	0	0	0	1	0	1	1	0	0	0	0	1	1	1
Multiple_sclerosis	rs917116-C	rs2893312	chr7	28170403	0.038	none	JAZF1	none	NA	none	0	0	0	0	0	0	0	0	0	0	0	0	0	0	0	0	0	0	0	0	0	0	0	0	0	0	0	0	0	0	0	0	0
Multiple_sclerosis	rs917116-C	rs4722760	chr7	28172183	0.0351	none	JAZF1	none	NA	chondrogenic_dif_cells	0	0	0	1	0	0	0	0	1	0	1	0	0	0	0	0	0	0	1	0	1	0	0	0	1	1	0	0	0	0	0	1	1
Multiple_sclerosis	rs917116-C	rs2189965	chr7	28172014	0.0322	none	JAZF1	none	NA	chondrogenic_dif_cells	0	0	0	1	0	0	0	0	1	0	1	0	0	0	0	0	0	0	1	0	1	0	0	0	1	1	0	0	0	0	0	1	1
Multiple_sclerosis	rs917116-C	rs1160871	chr7	28168745	0.0296	none	JAZF1	none	NA	none	0	0	0	0	0	0	0	0	0	0	0	0	0	0	0	0	0	0	0	0	0	0	0	0	0	0	0	0	0	0	0	0	0
Multiple_sclerosis	rs917116-C	rs1513272	chr7	28200097	0.029	none	JAZF1	none	NA	B_Cell_Centroblast	1	0	0	0	0	0	0	1	1	1	0	0	1	1	1	1	0	1	1	0	1	0	0	0	0	1	0	0	0	0	1	1	0
Multiple_sclerosis	rs60600003-C	rs60600003	chr7	37382465	0.1038	none	ELMO1	none	NA	Mobilized_CD34	1	1	1	1	1	1	1	1	1	1	1	1	1	1	1	1	1	1	1	1	1	1	1	1	1	1	0	1	0	0	1	0	0
Multiple_sclerosis	rs60600003-C	rs74382971	chr7	37405228	0.0366	none	ELMO1	none	NA	Th1	1	1	0	1	1	1	1	1	1	1	1	1	1	1	1	1	1	1	1	0	0	0	0	0	1	1	0	1	0	0	0	0	0
Multiple_sclerosis	rs60600003-C	rs80057400	chr7	37405477	0.0334	none	ELMO1	none	NA	Th1	0	0	0	0	1	0	0	1	0	1	1	0	1	1	1	0	0	1	1	0	0	0	0	0	1	0	0	1	0	0	0	0	0
Multiple_sclerosis	rs60600003-C	rs74416810	chr7	37407606	0.0333	none	ELMO1	none	NA	none	0	0	0	0	0	0	0	0	0	0	0	0	0	0	0	0	0	0	0	0	0	0	0	0	0	0	0	0	0	0	0	0	0
Multiple_sclerosis	rs60600003-C	rs77200985	chr7	37408769	0.0324	none	ELMO1	none	NA	none	0	0	0	0	0	0	0	0	0	0	0	0	0	0	0	0	0	0	0	0	0	0	0	0	0	0	0	0	0	0	0	0	0
Multiple_sclerosis	rs60600003-C	rs74988433	chr7	37408654	0.0321	none	ELMO1	none	NA	none	0	0	0	0	0	0	0	0	0	0	0	0	0	0	0	0	0	0	0	0	0	0	0	0	0	0	0	0	0	0	0	0	0
Multiple_sclerosis	rs60600003-C	rs77329151	chr7	37405110	0.0309	none	ELMO1	none	NA	Th1	1	1	0	1	1	1	1	1	1	1	1	1	1	1	1	1	1	1	1	0	0	0	0	0	1	1	0	1	0	0	0	0	0
Multiple_sclerosis	rs60600003-C	rs80248977	chr7	37406679	0.0296	none	ELMO1	none	NA	none	0	0	0	0	0	0	0	0	0	0	0	0	0	0	0	0	0	0	0	0	0	0	0	0	0	0	0	0	0	0	0	0	0
Multiple_sclerosis	rs60600003-C	rs77523594	chr7	37408401	0.0291	none	ELMO1	none	NA	none	0	0	0	0	0	0	0	0	0	0	0	0	0	0	0	0	0	0	0	0	0	0	0	0	0	0	0	0	0	0	0	0	0
Multiple_sclerosis	rs60600003-C	rs76050072	chr7	37407510	0.0278	none	ELMO1	none	NA	none	0	0	0	0	0	0	0	0	0	0	0	0	0	0	0	0	0	0	0	0	0	0	0	0	0	0	0	0	0	0	0	0	0
Multiple_sclerosis	rs17552904	rs17552904	chr7	50318308	0.0908	none	none	none	NA	none	0	0	0	0	0	0	0	0	0	0	0	0	0	0	0	0	0	0	0	0	0	0	0	0	0	0	0	0	0	0	0	0	0
Multiple_sclerosis	rs17552904	rs716719	chr7	50325717	0.0418	none	none	none	NA	adult_CD20	0	0	0	0	0	1	1	1	0	1	0	1	1	1	1	1	1	1	1	1	1	1	1	1	1	0	0	0	0	0	0	0	0
Multiple_sclerosis	rs17552904	rs2366034	chr7	50331256	0.0333	none	none	none	NA	CD25-_IL17-_Th_stim_MACS	0	0	0	0	0	0	0	0	0	1	1	1	1	1	1	1	0	0	1	1	0	0	0	0	0	0	0	0	0	0	0	0	0
Multiple_sclerosis	rs143577465-A	rs143577465	chr7	128709884	0.2318	none	none	none	NA	none	0	0	0	0	0	0	0	0	0	0	0	0	0	0	0	0	0	0	0	0	0	0	0	0	0	0	0	0	0	0	0	0	0
Multiple_sclerosis	rs143577465-A	rs13242075	chr7	128708939	0.2318	none	none	none	NA	none	0	0	0	0	0	0	0	0	0	0	0	0	0	0	0	0	0	0	0	0	0	0	0	0	0	0	0	0	0	0	0	0	0
Multiple_sclerosis	rs143577465-A	rs34420397	chr7	128710302	0.2318	none	none	none	NA	none	0	0	0	0	0	0	0	0	0	0	0	0	0	0	0	0	0	0	0	0	0	0	0	0	0	0	0	0	0	0	0	0	0
Multiple_sclerosis	rs2618478-C	rs2618478	chr8	11356002	0.1612	none	BLK	none	NA	GM12878	0	0	0	0	0	0	0	1	1	1	1	1	1	1	1	0	1	0	1	1	1	1	1	1	1	0	0	1	0	0	0	1	0
Multiple_sclerosis	rs2618478-C	rs75324661	chr8	11315592	0.0927	none	FAM167A	none	NA	Pancreatic_Islets	1	1	1	1	1	1	1	1	1	1	1	1	1	1	1	1	1	1	1	1	1	0	1	1	1	0	1	1	1	1	1	1	0
Multiple_sclerosis	rs2618478-C	rs13253092	chr8	11314991	0.0697	none	FAM167A	none	NA	Pancreatic_Islets	1	1	1	1	1	1	1	1	1	1	1	1	1	1	1	1	1	1	1	1	1	0	1	1	1	0	1	1	1	1	1	1	0
Multiple_sclerosis	rs2618478-C	rs7846252	chr8	11289053	0.05	none	C8orf12	none	NA	B_Cell_Centroblast	1	1	1	1	1	1	1	0	0	0	0	0	0	1	0	1	0	0	1	0	1	0	0	0	0	0	0	0	1	0	0	1	1
Multiple_sclerosis	rs2618478-C	rs13251015	chr8	11315048	0.044	none	FAM167A	none	NA	Pancreatic_Islets	1	1	1	1	1	1	1	1	1	1	1	1	1	1	1	1	1	1	1	1	1	0	1	1	1	0	1	1	1	1	1	1	0
Multiple_sclerosis	rs2618478-C	rs4841530	chr8	11289146	0.0351	none	C8orf12	none	NA	B_Cell_Centroblast	1	1	1	1	1	1	1	0	0	0	0	0	0	1	0	1	0	0	1	0	1	0	0	0	0	0	0	0	1	0	0	1	1
Multiple_sclerosis	rs2618478-C	rs2618479	chr8	11355821	0.0348	none	BLK	none	NA	GM12878	0	0	0	0	0	0	0	1	1	1	1	1	1	1	1	0	1	0	1	1	1	1	1	1	1	0	0	1	0	0	0	1	0
Multiple_sclerosis	rs2618478-C	rs2254546	chr8	11343680	0.0338	none	none	none	NA	GM12878	0	0	0	0	0	0	0	0	0	0	0	0	1	1	0	0	0	0	1	1	0	0	0	0	1	0	0	0	0	0	0	0	1
Multiple_sclerosis	rs6999228-A	rs6999228	chr8	79557844	0.0518	none	none	none	NA	none	0	0	0	0	0	0	0	0	0	0	0	0	0	0	0	0	0	0	0	0	0	0	0	0	0	0	0	0	0	0	0	0	0
Multiple_sclerosis	rs6999228-A	rs1466526	chr8	79555474	0.0518	none	none	none	NA	none	0	0	0	0	0	0	0	0	0	0	0	0	0	0	0	0	0	0	0	0	0	0	0	0	0	0	0	0	0	0	0	0	0
Multiple_sclerosis	rs6999228-A	rs4609182	chr8	79557227	0.0518	none	none	none	NA	none	0	0	0	0	0	0	0	0	0	0	0	0	0	0	0	0	0	0	0	0	0	0	0	0	0	0	0	0	0	0	0	0	0
Multiple_sclerosis	rs6999228-A	rs2015125	chr8	79559230	0.0341	none	none	none	NA	none	0	0	0	0	0	0	0	0	0	0	0	0	0	0	0	0	0	0	0	0	0	0	0	0	0	0	0	0	0	0	0	0	0
Multiple_sclerosis	rs6999228-A	rs28429528	chr8	79591017	0.034	none	FAM164A	none	NA	none	0	0	0	0	0	0	0	0	0	0	0	0	0	0	0	0	0	0	0	0	0	0	0	0	0	0	0	0	0	0	0	0	0
Multiple_sclerosis	rs6999228-A	rs3899796	chr8	79568082	0.0285	none	none	ZC2HC1A	+	none	0	0	0	0	0	0	0	0	0	0	0	0	0	0	0	0	0	0	0	0	0	0	0	0	0	0	0	0	0	0	0	0	0
Multiple_sclerosis	rs6999228-A	rs10093654	chr8	79572595	0.0285	none	none	ZC2HC1A	+	none	0	0	0	0	0	0	0	0	0	0	0	0	0	0	0	0	0	0	0	0	0	0	0	0	0	0	0	0	0	0	0	0	0
Multiple_sclerosis	rs6999228-A	rs10093797	chr8	79572713	0.0285	none	none	ZC2HC1A	+	none	0	0	0	0	0	0	0	0	0	0	0	0	0	0	0	0	0	0	0	0	0	0	0	0	0	0	0	0	0	0	0	0	0
Multiple_sclerosis	rs6999228-A	rs13269243	chr8	79581736	0.0285	none	FAM164A	none	NA	none	0	0	0	0	0	0	0	0	0	0	0	0	0	0	0	0	0	0	0	0	0	0	0	0	0	0	0	0	0	0	0	0	0
Multiple_sclerosis	rs6999228-A	rs10093113	chr8	79585248	0.0285	none	FAM164A	none	NA	none	0	0	0	0	0	0	0	0	0	0	0	0	0	0	0	0	0	0	0	0	0	0	0	0	0	0	0	0	0	0	0	0	0
Multiple_sclerosis	rs6999228-A	rs2953477	chr8	79624605	0.0284	none	FAM164A	none	NA	none	0	0	0	0	0	0	0	0	0	0	0	0	0	0	0	0	0	0	0	0	0	0	0	0	0	0	0	0	0	0	0	0	0
Multiple_sclerosis	rs7820652-A	rs7820652	chr8	129215374	0.0724	none	none	none	NA	NH-Osteoblast	0	0	0	0	0	0	0	0	0	0	0	0	1	1	1	0	0	0	1	0	1	0	1	0	0	0	0	0	1	0	1	1	1
Multiple_sclerosis	rs7820652-A	rs6995020	chr8	129207225	0.046	none	none	none	NA	none	0	0	0	0	0	0	0	0	0	0	0	0	0	0	0	0	0	0	0	0	0	0	0	0	0	0	0	0	0	0	0	0	0
Multiple_sclerosis	rs7820652-A	rs6989829	chr8	129185399	0.0326	none	none	none	NA	B_Cell_Centroblast	0	0	0	0	0	0	0	0	1	0	1	0	0	1	1	0	0	1	1	1	1	0	1	0	1	1	1	0	0	1	1	1	1
Multiple_sclerosis	rs7820652-A	rs6470605	chr8	129185951	0.0326	none	none	none	NA	B_Cell_Centroblast	0	0	0	0	0	0	0	0	1	0	1	0	0	1	1	0	0	1	1	1	1	0	1	0	1	1	1	0	0	1	1	1	1
Multiple_sclerosis	rs7820652-A	rs6470606	chr8	129185996	0.0326	none	none	none	NA	B_Cell_Centroblast	0	0	0	0	0	0	0	0	1	0	1	0	0	1	1	0	0	1	1	1	1	0	1	0	1	1	1	0	0	1	1	1	1
Multiple_sclerosis	rs7820652-A	rs7826413	chr8	129186636	0.0326	none	none	none	NA	B_Cell_Centroblast	0	0	0	0	0	0	0	0	0	0	1	1	1	0	1	1	0	1	1	1	1	0	1	0	1	1	1	0	0	1	1	1	1
Multiple_sclerosis	rs7820652-A	rs6987197	chr8	129187748	0.0326	none	none	none	NA	NH-Osteoblast	0	0	0	0	0	0	0	0	1	0	1	1	1	1	1	1	1	1	0	0	1	1	1	1	1	1	1	1	1	1	1	1	1
Multiple_sclerosis	rs7820652-A	rs56202199	chr8	129207906	0.0286	none	none	none	NA	HepG2	0	0	0	0	0	0	0	0	0	0	0	0	1	1	1	1	0	0	0	0	0	0	1	0	0	0	1	1	0	0	0	1	0
Multiple_sclerosis	rs7820652-A	rs62527078	chr8	129210326	0.0284	none	none	none	NA	HepG2	0	0	0	0	0	0	0	0	0	1	0	0	0	1	0	1	0	0	1	0	0	0	1	0	1	1	1	1	1	1	1	1	1
Multiple_sclerosis	rs2104286-A	rs2104286	chr10	6099045	0.9034	none	IL2RA	none	NA	Th1	1	1	1	1	0	1	1	1	1	1	1	1	1	1	1	0	1	0	1	1	1	0	1	1	1	1	0	1	1	1	0	0	0
Multiple_sclerosis	rs2104286-A	rs4749955	chr10	6118966	0.0314	none	none	none	NA	none	0	0	0	0	0	0	0	0	0	0	0	0	0	0	0	0	0	0	0	0	0	0	0	0	0	0	0	0	0	0	0	0	0
Multiple_sclerosis	rs2104286-A	rs7078535	chr10	6120424	0.0287	none	none	none	NA	none	0	0	0	0	0	0	0	0	0	0	0	0	0	0	0	0	0	0	0	0	0	0	0	0	0	0	0	0	0	0	0	0	0
Multiple_sclerosis	rs1782645-A	rs1782645	chr10	81048611	0.3482	none	ZMIZ1	none	NA	Mobilized_CD34	1	1	1	1	1	1	1	1	1	1	1	1	1	1	1	0	1	1	1	1	0	1	0	1	1	1	0	1	1	1	0	1	1
Multiple_sclerosis	rs1782645-A	rs2802372	chr10	81047575	0.2754	none	ZMIZ1	none	NA	Mobilized_CD34	1	1	1	1	1	1	1	0	1	1	1	1	1	1	1	0	1	1	1	1	1	1	0	1	1	1	1	1	1	1	0	1	1
Multiple_sclerosis	rs1782645-A	rs1250568	chr10	81045280	0.2112	none	ZMIZ1	none	NA	GM12878	1	1	1	1	1	1	1	1	1	1	1	1	1	1	1	1	1	1	1	1	1	1	1	1	1	1	1	1	1	1	1	1	1
Multiple_sclerosis	rs1782645-A	rs1250564	chr10	81047342	0.0312	none	ZMIZ1	none	NA	Mobilized_CD34	1	1	1	1	1	1	1	0	1	1	1	1	1	1	1	0	1	1	1	1	1	1	0	1	1	1	1	1	1	1	0	1	1
Multiple_sclerosis	rs1782645-A	rs1250567	chr10	81046265	0.0288	none	ZMIZ1	none	NA	GM12878	1	1	1	1	1	1	1	1	1	1	1	1	1	1	1	1	1	1	1	1	1	1	1	1	1	1	0	1	1	1	1	1	1
Multiple_sclerosis	rs34383631-A	rs34383631	chr11	60793330	0.2811	none	none	none	NA	Th0	0	0	0	0	1	1	1	1	1	1	1	1	1	1	1	1	1	1	1	1	0	0	1	1	1	1	0	1	0	1	0	0	0
Multiple_sclerosis	rs34383631-A	rs4939490	chr11	60793651	0.2811	none	none	none	NA	Th0	0	0	0	0	1	1	1	1	1	1	1	1	1	1	1	1	1	1	1	1	0	0	1	1	1	1	0	1	0	1	0	0	0
Multiple_sclerosis	rs34383631-A	rs4939491	chr11	60793722	0.2811	none	none	none	NA	Th0	0	0	0	0	1	1	1	1	1	1	1	1	1	1	1	1	1	1	1	1	0	0	1	1	1	1	0	1	0	1	0	0	0
Multiple_sclerosis	rs34383631-A	rs4939489	chr11	60793648	0.0704	none	none	none	NA	Th0	0	0	0	0	1	1	1	1	1	1	1	1	1	1	1	1	1	1	1	1	0	0	1	1	1	1	0	1	0	1	0	0	0
Multiple_sclerosis	rs34383631-A	rs175122	chr11	60830260	0.0298	none	none	none	NA	Th2	0	0	0	0	0	0	0	1	1	1	1	1	1	1	1	0	0	1	1	1	1	0	1	0	0	0	0	0	0	0	0	0	0
Multiple_sclerosis	rs11217040	rs11217040	chr11	118680648	0.1189	none	none	none	NA	none	0	0	0	0	0	0	0	0	0	0	0	0	0	0	0	0	0	0	0	0	0	0	0	0	0	0	0	0	0	0	0	0	0
Multiple_sclerosis	rs11217040	rs59065116	chr11	118680702	0.0646	none	none	none	NA	none	0	0	0	0	0	0	0	0	0	0	0	0	0	0	0	0	0	0	0	0	0	0	0	0	0	0	0	0	0	0	0	0	0
Multiple_sclerosis	rs11217040	rs76704408	chr11	118683327	0.0635	none	none	none	NA	adult_CD20	0	0	0	0	0	0	0	0	1	0	0	0	1	0	0	0	0	0	1	0	1	0	0	0	0	0	0	0	0	0	0	0	0
Multiple_sclerosis	rs11217040	rs17122453	chr11	118683564	0.0558	none	none	none	NA	adult_CD20	0	0	0	0	0	0	0	0	1	0	0	0	1	0	0	0	0	0	1	0	1	0	0	0	0	0	0	0	0	0	0	0	0
Multiple_sclerosis	rs11217040	rs7942535	chr11	118681464	0.0531	none	none	none	NA	adult_CD20	0	0	0	0	0	0	0	1	1	1	0	0	0	1	1	0	1	0	1	0	0	1	0	0	0	0	0	0	0	0	0	0	0
Multiple_sclerosis	rs11217040	rs10892299	chr11	118726843	0.0529	none	none	none	NA	B_Cell_Centroblast	0	0	0	0	1	0	0	0	0	0	0	0	1	1	0	1	0	0	1	0	1	0	0	0	0	0	0	0	0	0	0	0	0
Multiple_sclerosis	rs11217040	rs4936443	chr11	118740864	0.0407	none	none	none	NA	B_Cell_Centroblast	1	1	1	1	1	1	1	1	1	1	1	1	1	1	1	1	1	1	1	1	1	1	1	1	1	1	1	1	1	1	1	1	1
Multiple_sclerosis	rs11217040	rs11217041	chr11	118682350	0.0405	none	none	none	NA	none	0	0	0	0	0	0	0	0	0	0	0	0	0	0	0	0	0	0	0	0	0	0	0	0	0	0	0	0	0	0	0	0	0
Multiple_sclerosis	rs11217040	rs11217042	chr11	118682528	0.0405	none	none	none	NA	none	0	0	0	0	0	0	0	0	0	0	0	0	0	0	0	0	0	0	0	0	0	0	0	0	0	0	0	0	0	0	0	0	0
Multiple_sclerosis	rs11217040	rs80065107	chr11	118682767	0.034	none	none	none	NA	none	0	0	0	0	0	0	0	0	0	0	0	0	0	0	0	0	0	0	0	0	0	0	0	0	0	0	0	0	0	0	0	0	0
Multiple_sclerosis	rs11217040	rs10790269	chr11	118729456	0.0329	none	none	none	NA	none	0	0	0	0	0	0	0	0	0	0	0	0	0	0	0	0	0	0	0	0	0	0	0	0	0	0	0	0	0	0	0	0	0
Multiple_sclerosis	rs11217040	rs73005426	chr11	118681083	0.0286	none	none	none	NA	adult_CD20	0	0	0	0	0	0	0	1	1	1	0	0	0	1	1	0	1	0	1	0	0	1	0	0	0	0	0	0	0	0	0	0	0
Multiple_sclerosis	rs11217040	rs4938573	chr11	118741842	0.0281	none	none	none	NA	B_Cell_Centroblast	1	1	1	1	1	1	1	1	1	1	1	1	1	1	1	1	1	1	1	1	1	1	1	1	1	1	1	1	1	1	1	1	1
Multiple_sclerosis	rs523604-A	rs523604	chr11	118755738	0.6546	none	CXCR5	none	NA	adult_CD20	0	0	1	0	0	0	0	1	1	1	1	1	1	1	1	0	1	0	1	1	1	1	1	1	0	1	0	1	1	0	0	0	0
Multiple_sclerosis	rs523604-A	rs3922	chr11	118765600	0.12	utr3	CXCR5	none	NA	adult_CD20	1	0	1	0	1	0	1	1	1	1	1	1	1	1	1	1	1	0	1	1	1	1	0	0	1	0	1	1	0	0	0	0	1
Multiple_sclerosis	rs523604-A	rs10892307	chr11	118754649	0.0864	utr5	CXCR5	none	NA	adult_CD20	0	1	0	0	0	0	0	1	1	1	1	1	1	1	1	1	1	1	1	1	1	1	1	1	0	1	0	1	0	0	0	0	1
Multiple_sclerosis	rs523604-A	rs3176905	chr11	118755630	0.0607	none	CXCR5	none	NA	adult_CD20	0	0	1	0	0	0	0	1	1	1	1	1	1	1	1	0	1	0	1	1	1	1	1	1	0	1	0	1	1	0	0	0	0
Multiple_sclerosis	rs1800693-G	rs1800693	chr12	6440009	0.7146	none	TNFRSF1A	TNFRSF1A	-	AdiposeNuclei	1	1	1	1	1	1	1	1	1	1	1	1	1	1	1	1	1	1	0	1	0	1	0	1	1	1	1	1	1	1	1	1	1
Multiple_sclerosis	rs1800693-G	rs1860545	chr12	6446777	0.0703	none	TNFRSF1A	TNFRSF1A	-	AdiposeNuclei	1	1	1	1	1	1	1	1	1	1	1	1	1	1	1	1	1	1	0	1	1	1	1	1	1	1	1	1	1	1	1	1	1
Multiple_sclerosis	rs1800693-G	rs4149587	chr12	6441348	0.0598	none	TNFRSF1A	none	NA	chondrogenic_dif_cells	0	0	1	1	0	1	1	1	1	1	1	1	1	1	1	1	1	1	0	1	1	1	1	1	1	1	1	1	1	1	1	1	1
Multiple_sclerosis	rs1800693-G	rs4149580	chr12	6446990	0.0483	none	TNFRSF1A	none	NA	AdiposeNuclei	1	1	1	1	1	1	1	1	1	1	1	1	1	1	1	1	1	1	0	1	1	1	1	1	1	1	1	1	1	1	1	1	1
Multiple_sclerosis	rs1800693-G	rs4149581	chr12	6446985	0.0388	none	TNFRSF1A	none	NA	AdiposeNuclei	1	1	1	1	1	1	1	1	1	1	1	1	1	1	1	1	1	1	0	1	1	1	1	1	1	1	1	1	1	1	1	1	1
Multiple_sclerosis	rs1800693-G	rs112119356	chr12	6453511	0.0341	none	none	none	NA	Duodenum_mucosa	1	1	1	1	1	1	1	1	1	1	1	1	1	0	0	1	1	1	0	0	1	1	1	1	1	1	1	1	1	1	1	1	1
Multiple_sclerosis	rs12296430-C	rs12296430	chr12	6503500	0.3743	none	none	none	NA	CD45RO_CD8	0	1	0	0	1	1	1	1	0	0	0	1	0	1	0	0	1	1	0	1	0	1	1	1	1	1	1	1	1	1	0	1	1
Multiple_sclerosis	rs12296430-C	rs10466905	chr12	6502832	0.3743	none	none	none	NA	CD45RO_CD8	0	1	0	0	1	1	1	1	0	0	0	1	0	1	0	0	1	1	0	1	0	1	1	1	1	1	1	1	1	1	0	1	1
Multiple_sclerosis	rs12296430-C	rs2364482	chr12	6502131	0.219	none	none	none	NA	colonic_mucosa	0	0	0	0	1	0	0	0	0	0	0	0	0	1	0	0	1	1	0	0	1	1	1	1	1	1	0	1	1	0	1	0	1
Multiple_sclerosis	rs11052877-G	rs11052877	chr12	9905690	0.0839	utr3	CD69	CD69	+	CD25-_IL17-_Th_stim_MACS	0	0	0	0	0	0	0	1	1	1	1	1	1	1	1	1	1	0	1	1	0	1	0	0	0	0	0	0	0	0	0	0	0
Multiple_sclerosis	rs11052877-G	rs10844706	chr12	9910132	0.0839	none	CD69	CD69	+	Th2	0	0	0	0	0	0	0	1	1	1	1	1	1	1	1	1	1	0	1	1	1	1	1	1	0	0	0	0	0	0	0	0	0
Multiple_sclerosis	rs11052877-G	rs10844569	chr12	9870352	0.0486	none	CLECL1	none	NA	B_Cell_Centroblast	0	0	0	0	0	0	0	1	0	1	1	0	1	0	1	1	0	0	1	1	1	0	0	0	1	0	0	0	0	0	0	0	0
Multiple_sclerosis	rs11052877-G	rs10844503	chr12	9854256	0.0385	none	none	none	NA	Th0	0	0	0	0	0	0	0	1	1	1	1	1	1	1	1	1	1	0	1	1	1	0	0	0	1	1	0	0	0	0	0	0	0
Multiple_sclerosis	rs11052877-G	rs10772108	chr12	9899050	0.0341	none	none	none	NA	none	0	0	0	0	0	0	0	0	0	0	0	0	0	0	0	0	0	0	0	0	0	0	0	0	0	0	0	0	0	0	0	0	0
Multiple_sclerosis	rs11052877-G	rs10772070	chr12	9869916	0.0314	none	CLECL1	none	NA	B_Cell_Centroblast	0	0	0	0	0	0	0	1	0	1	1	0	1	0	1	1	0	0	1	1	1	0	0	0	1	0	0	0	0	0	0	0	0
Multiple_sclerosis	rs11052877-G	rs12227655	chr12	9868248	0.0295	none	none	none	NA	adult_CD20	0	0	0	0	0	0	0	1	0	0	1	0	1	0	1	0	0	1	1	1	1	0	0	0	0	0	0	0	0	0	0	0	0
Multiple_sclerosis	rs11052877-G	rs10772073	chr12	9870024	0.0292	none	CLECL1	none	NA	B_Cell_Centroblast	0	0	0	0	0	0	0	1	0	1	1	0	1	0	1	1	0	0	1	1	1	0	0	0	1	0	0	0	0	0	0	0	0
Multiple_sclerosis	rs11172342	rs11172342	chr12	58187758	0.0373	none	TSFM	METTL21B	-	NH-Osteoblast	0	1	0	1	0	1	0	1	1	1	1	1	1	1	1	1	1	1	0	0	1	1	1	0	0	1	1	1	1	0	1	1	1
Multiple_sclerosis	rs11172342	rs11172349	chr12	58212528	0.0343	utr3	none	none	NA	AdiposeNuclei	1	1	1	1	1	1	1	1	1	1	1	1	1	0	1	0	1	1	1	0	1	1	1	1	0	1	1	1	1	1	1	0	1
Multiple_sclerosis	rs11172342	rs10877016	chr12	58167992	0.0338	none	METTL21B	none	NA	K562	1	1	1	0	1	0	1	1	1	1	1	1	1	0	0	1	1	0	1	1	1	1	1	1	0	0	1	1	1	1	1	1	1
Multiple_sclerosis	rs11172342	rs11172351	chr12	58213485	0.0333	none	none	none	NA	Mobilized_CD34	1	0	1	1	1	1	1	1	0	1	1	1	0	1	0	1	0	1	1	0	1	1	1	1	0	1	1	1	1	0	1	0	1
Multiple_sclerosis	rs11172342	rs6581155	chr12	58178162	0.0331	none	TSFM	none	NA	CD25+_CD127-_Treg	0	0	0	0	0	0	0	1	0	1	1	0	1	0	1	0	0	0	0	1	1	1	1	0	0	0	0	0	1	0	0	1	0
Multiple_sclerosis	rs11172342	rs11172343	chr12	58188157	0.0325	none	TSFM	METTL21B	-	NH-Osteoblast	0	0	0	0	0	1	0	1	1	1	1	1	1	1	1	0	1	1	0	0	1	1	1	0	0	1	0	1	1	0	1	1	1
Multiple_sclerosis	rs11172342	rs3825079	chr12	58203354	0.032	none	AVIL	METTL21B	-	none	0	0	0	0	0	0	0	0	0	0	0	0	0	0	0	0	0	0	0	0	0	0	0	0	0	0	0	0	0	0	0	0	0
Multiple_sclerosis	rs11172342	rs10877013	chr12	58165085	0.0319	none	METTL1	none	NA	CD25-_IL17+_Th17_stim	1	1	1	1	1	1	1	1	1	1	1	1	1	1	1	1	1	1	1	1	1	1	1	1	1	1	1	1	1	1	1	1	1
Multiple_sclerosis	rs11172342	rs11172335	chr12	58175201	0.0319	utr3	METTL21B	METTL21B	-	CD25-_CD45RO+_mem	1	1	1	1	1	1	1	1	1	1	1	1	1	1	1	1	1	1	0	1	0	1	1	1	1	1	1	1	1	1	0	1	1
Multiple_sclerosis	rs11172342	rs10431552	chr12	58178148	0.0306	none	TSFM	METTL21B	-	CD25+_CD127-_Treg	0	0	0	0	0	0	0	1	0	1	1	0	1	0	1	0	0	0	0	1	1	1	1	0	0	0	0	0	1	0	0	1	0
Multiple_sclerosis	rs11172342	rs10877015	chr12	58167788	0.0303	none	METTL21B	METTL21B	-	K562	1	1	1	0	1	0	1	1	1	1	1	1	1	0	0	1	1	0	1	1	1	1	1	1	0	0	1	1	1	1	1	1	1
Multiple_sclerosis	rs11172342	rs8181644	chr12	58173466	0.029	none	METTL21B	none	NA	kidney	1	0	1	1	0	0	1	1	1	1	1	1	1	1	0	1	1	1	0	0	0	1	1	1	1	0	1	0	1	1	0	1	1
Multiple_sclerosis	rs11172342	rs10877019	chr12	58172929	0.0289	none	METTL21B	none	NA	CD25-_IL17+_Th17_stim	0	0	0	0	1	0	0	0	1	1	1	1	1	1	1	1	1	0	1	0	1	1	1	0	0	0	0	1	1	1	0	0	1
Multiple_sclerosis	rs11172342	rs10783847	chr12	58196447	0.0284	utr3	TSFM	METTL21B	-	none	0	0	0	0	0	0	0	0	0	0	0	0	0	0	0	0	0	0	0	0	0	0	0	0	0	0	0	0	0	0	0	0	0
Multiple_sclerosis	rs11172342	rs11172333	chr12	58170335	0.0277	none	METTL21B	none	NA	none	0	0	0	0	0	0	0	0	0	0	0	0	0	0	0	0	0	0	0	0	0	0	0	0	0	0	0	0	0	0	0	0	0
Multiple_sclerosis	rs7132277-A	rs7132277	chr12	123593382	0.0611	none	PITPNM2	none	NA	Pancreatic_Islets	1	1	1	1	1	1	1	1	1	1	1	1	1	1	1	0	0	1	1	0	1	1	1	1	1	1	1	1	1	1	1	0	1
Multiple_sclerosis	rs4772201-A	rs4772201	chr13	100086259	0.5382	none	none	none	NA	CD25-_IL17-_Th_stim_MACS	0	0	0	0	0	0	0	1	1	1	1	1	1	1	1	1	1	1	1	1	0	1	1	1	1	1	1	1	0	1	0	1	0
Multiple_sclerosis	rs4772201-A	rs61972489	chr13	100085274	0.1485	none	none	none	NA	adult_CD14	0	1	1	1	1	1	1	1	1	1	1	1	1	1	1	1	1	1	1	1	1	1	1	1	1	1	1	1	0	1	1	1	1
Multiple_sclerosis	rs4772201-A	rs61972490	chr13	100087510	0.0486	none	none	none	NA	Th2	0	0	0	0	0	0	0	1	1	1	1	1	1	1	1	1	1	1	1	1	0	1	1	1	0	0	1	1	0	0	0	0	0
Multiple_sclerosis	rs4772201-A	rs16956559	chr13	100087629	0.0468	none	none	none	NA	Th2	0	0	0	0	0	0	0	1	1	1	1	1	1	1	1	1	1	1	1	1	0	1	1	1	0	0	1	1	0	0	0	0	0
Multiple_sclerosis	rs4772201-A	rs1885890	chr13	100091244	0.0357	none	none	none	NA	none	0	0	0	0	0	0	0	0	0	0	0	0	0	0	0	0	0	0	0	0	0	0	0	0	0	0	0	0	0	0	0	0	0
Multiple_sclerosis	rs4772201-A	rs1116323	chr13	100093868	0.0352	none	none	none	NA	none	0	0	0	0	0	0	0	0	0	0	0	0	0	0	0	0	0	0	0	0	0	0	0	0	0	0	0	0	0	0	0	0	0
Multiple_sclerosis	rs4772201-A	rs1980695	chr13	100095651	0.0311	none	none	none	NA	none	0	0	0	0	0	0	0	0	0	0	0	0	0	0	0	0	0	0	0	0	0	0	0	0	0	0	0	0	0	0	0	0	0
Multiple_sclerosis	rs4772201-A	rs7329158	chr13	100086970	0.0303	none	none	none	NA	Th2	0	0	0	0	0	0	0	1	1	1	1	1	1	1	1	1	1	1	1	1	0	1	1	1	0	0	1	1	0	0	0	0	0
Multiple_sclerosis	rs74796499-C	rs74796499	chr14	88432328	0.2377	none	GALC	none	NA	none	0	0	0	0	0	0	0	0	0	0	0	0	0	0	0	0	0	0	0	0	0	0	0	0	0	0	0	0	0	0	0	0	0
Multiple_sclerosis	rs74796499-C	rs11552556	chr14	88452945	0.0949	synonymous	GALC	none	NA	none	0	0	0	0	0	0	0	0	0	0	0	0	0	0	0	0	0	0	0	0	0	0	0	0	0	0	0	0	0	0	0	0	0
Multiple_sclerosis	rs74796499-C	rs78461372	chr14	88472846	0.0534	none	GPR65	none	NA	CD25-_IL17-_Th_stim_MACS	0	0	0	1	1	1	1	1	1	1	1	1	1	1	1	1	1	1	1	1	1	1	1	1	1	1	1	1	0	1	0	1	0
Multiple_sclerosis	rs74796499-C	rs78359996	chr14	88408554	0.0387	none	GALC	none	NA	none	0	0	0	0	0	0	0	0	0	0	0	0	0	0	0	0	0	0	0	0	0	0	0	0	0	0	0	0	0	0	0	0	0
Multiple_sclerosis	rs74796499-C	rs117822168	chr14	88504511	0.0355	none	BC029479	none	NA	none	0	0	0	0	0	0	0	0	0	0	0	0	0	0	0	0	0	0	0	0	0	0	0	0	0	0	0	0	0	0	0	0	0
Multiple_sclerosis	rs74796499-C	rs75849002	chr14	88409860	0.033	none	GALC	none	NA	none	0	0	0	0	0	0	0	0	0	0	0	0	0	0	0	0	0	0	0	0	0	0	0	0	0	0	0	0	0	0	0	0	0
Multiple_sclerosis	rs12708716-A	rs12708716	chr16	11179873	0.2849	none	CLEC16A	none	NA	Th2	0	0	0	0	0	0	0	0	1	1	1	1	1	1	1	0	0	0	1	1	0	1	1	1	1	0	0	0	0	1	0	0	0
Multiple_sclerosis	rs12708716-A	rs9929994	chr16	11178245	0.1194	none	CLEC16A	none	NA	Th2	0	1	0	0	1	0	0	1	0	1	1	0	1	1	1	1	1	1	1	1	1	0	1	1	1	1	1	1	1	1	1	1	1
Multiple_sclerosis	rs12708716-A	rs12928537	chr16	11191400	0.0542	none	CLEC16A	none	NA	Th2	0	0	0	0	0	0	0	0	0	1	1	0	1	1	1	1	0	1	0	1	0	0	0	1	0	0	1	0	0	1	0	1	0
Multiple_sclerosis	rs12708716-A	rs71388704	chr16	11181756	0.0512	none	CLEC16A	none	NA	Th2	0	1	0	0	0	0	0	1	1	1	1	1	1	1	1	1	1	0	1	1	1	1	1	1	1	0	1	0	0	1	0	1	0
Multiple_sclerosis	rs12708716-A	rs12924729	chr16	11187783	0.0461	none	CLEC16A	none	NA	Th2	0	0	1	0	0	1	1	1	1	1	1	1	1	1	1	1	1	1	1	1	1	1	1	1	1	0	1	1	1	1	1	1	0
Multiple_sclerosis	rs12708716-A	rs12927355	chr16	11194771	0.0447	none	CLEC16A	none	NA	Th2	1	1	1	0	0	0	1	1	1	1	1	1	1	1	1	1	1	1	1	1	1	1	1	1	1	1	1	1	1	1	1	1	1
Multiple_sclerosis	rs12708716-A	rs7203793	chr16	11182134	0.0435	none	CLEC16A	none	NA	Th2	0	1	0	0	0	0	0	1	1	1	1	1	1	1	1	1	1	0	1	1	1	1	1	1	1	0	1	0	0	1	0	1	0
Multiple_sclerosis	rs12708716-A	rs2041670	chr16	11174652	0.0397	none	CLEC16A	none	NA	Th2	1	1	1	1	1	0	1	1	0	1	1	0	1	1	1	0	0	1	1	1	1	0	1	1	1	1	1	1	1	1	1	1	1
Multiple_sclerosis	rs12708716-A	rs11648679	chr16	11175984	0.034	none	CLEC16A	none	NA	Th2	1	1	1	0	1	0	0	1	0	1	1	0	1	1	1	0	0	1	1	1	1	1	0	0	0	1	1	1	0	1	0	1	0
Multiple_sclerosis	rs12708716-A	rs12935413	chr16	11210447	0.0287	none	CLEC16A	none	NA	Th2	0	0	0	0	0	0	0	1	1	1	1	0	1	1	1	1	1	0	1	1	0	1	0	0	0	0	0	0	0	0	0	0	0
Multiple_sclerosis	rs243317-A	rs243317	chr16	11357331	0.3007	none	RMI2	none	NA	Th1	0	0	0	0	1	0	0	1	1	1	1	1	1	1	1	1	1	1	1	1	1	1	1	1	1	0	1	0	0	0	0	0	0
Multiple_sclerosis	rs243317-A	rs243318	chr16	11358018	0.1305	none	RMI2	none	NA	Th1	0	0	0	0	0	0	0	1	1	1	1	1	1	1	1	1	1	1	1	1	1	1	1	1	1	0	1	0	1	1	0	0	0
Multiple_sclerosis	rs243317-A	rs1646019	chr16	11359680	0.0996	none	RMI2	none	NA	Th1	0	0	0	0	0	0	0	0	1	0	1	1	1	1	1	0	0	0	0	1	1	0	1	1	1	0	1	1	1	0	0	0	0
Multiple_sclerosis	rs243317-A	rs243323	chr16	11361202	0.0946	none	RMI2	none	NA	HepG2	0	0	0	0	0	0	0	0	0	0	0	0	1	1	1	0	0	0	0	0	0	0	1	0	0	0	1	0	0	0	0	0	0
Multiple_sclerosis	rs243317-A	rs814260	chr16	11335999	0.0726	none	none	none	NA	none	0	0	0	0	0	0	0	0	0	0	0	0	0	0	0	0	0	0	0	0	0	0	0	0	0	0	0	0	0	0	0	0	0
Multiple_sclerosis	rs243317-A	rs243325	chr16	11354497	0.0415	none	RMI2	none	NA	Th1	1	0	0	0	0	1	1	1	1	0	1	1	1	1	1	1	0	0	1	1	0	0	1	1	1	1	1	0	0	1	1	0	0
Multiple_sclerosis	rs243317-A	rs413024	chr16	11354091	0.039	none	RMI2	none	NA	Th1	1	0	0	0	0	1	1	1	1	0	1	1	1	1	1	1	0	0	1	1	0	0	1	1	1	1	1	0	0	1	1	0	0
Multiple_sclerosis	rs243317-A	rs1111186	chr16	11347048	0.0337	none	RMI2	none	NA	Th2	0	1	0	1	0	1	1	1	1	1	1	1	1	1	1	1	1	0	1	1	1	1	1	1	1	1	1	1	1	1	1	1	1
Multiple_sclerosis	rs243317-A	rs4780355	chr16	11347858	0.031	none	RMI2	none	NA	Th2	0	1	0	1	0	1	1	1	1	1	1	1	1	1	1	1	1	0	1	1	1	1	1	1	1	1	1	1	1	1	1	1	1
Multiple_sclerosis	rs8052717-A	rs8052717	chr16	11448517	0.6863	none	none	none	NA	Th1	0	0	0	0	0	0	0	1	1	1	1	1	1	1	1	1	1	1	1	1	1	1	1	1	1	0	1	1	0	1	0	1	1
Multiple_sclerosis	rs8052717-A	rs146278684	chr16	11370619	0.1219	none	RMI2	none	NA	HepG2	0	0	0	0	0	0	0	0	0	0	0	1	1	0	1	0	0	0	0	0	0	0	1	1	0	0	1	0	0	0	0	0	0
Multiple_sclerosis	rs8052717-A	rs118080654	chr16	11370548	0.0958	none	RMI2	none	NA	HepG2	0	0	0	0	0	0	0	0	0	0	0	1	1	0	1	0	0	0	0	0	0	0	1	1	0	0	1	0	0	0	0	0	0
Multiple_sclerosis	rs8052717-A	rs72773885	chr16	11465627	0.0288	none	none	none	NA	HepG2	0	0	0	0	0	0	0	0	1	0	0	0	1	1	1	1	0	1	0	1	1	0	0	1	0	0	1	1	1	1	0	1	0
Multiple_sclerosis	rs1886700-A	rs1886700	chr16	68685905	0.3821	none	CDH3	none	NA	none	0	0	0	0	0	0	0	0	0	0	0	0	0	0	0	0	0	0	0	0	0	0	0	0	0	0	0	0	0	0	0	0	0
Multiple_sclerosis	rs1886700-A	rs3114397	chr16	68703533	0.0982	none	CDH3	none	NA	Th1	0	0	0	0	0	0	0	1	0	0	0	0	1	1	1	0	0	0	0	1	0	0	0	0	0	0	0	0	0	0	0	0	0
Multiple_sclerosis	rs1886700-A	rs3118229	chr16	68710165	0.0775	none	CDH3	none	NA	none	0	0	0	0	0	0	0	0	0	0	0	0	0	0	0	0	0	0	0	0	0	0	0	0	0	0	0	0	0	0	0	0	0
Multiple_sclerosis	rs1886700-A	rs4280230	chr16	68705323	0.0651	none	CDH3	none	NA	none	0	0	0	0	0	0	0	0	0	0	0	0	0	0	0	0	0	0	0	0	0	0	0	0	0	0	0	0	0	0	0	0	0
Multiple_sclerosis	rs1886700-A	rs73558865	chr16	68684269	0.0591	none	CDH3	none	NA	none	0	0	0	0	0	0	0	0	0	0	0	0	0	0	0	0	0	0	0	0	0	0	0	0	0	0	0	0	0	0	0	0	0
Multiple_sclerosis	rs1886700-A	rs3118230	chr16	68709359	0.0578	none	CDH3	none	NA	none	0	0	0	0	0	0	0	0	0	0	0	0	0	0	0	0	0	0	0	0	0	0	0	0	0	0	0	0	0	0	0	0	0
Multiple_sclerosis	rs1886700-A	rs3114403	chr16	68720897	0.0575	none	CDH3	none	NA	none	0	0	0	0	0	0	0	0	0	0	0	0	0	0	0	0	0	0	0	0	0	0	0	0	0	0	0	0	0	0	0	0	0
Multiple_sclerosis	rs1886700-A	rs2296410	chr16	68712217	0.0511	none	CDH3	none	NA	none	0	0	0	0	0	0	0	0	0	0	0	0	0	0	0	0	0	0	0	0	0	0	0	0	0	0	0	0	0	0	0	0	0
Multiple_sclerosis	rs7190458-A	rs7190458	chr16	75263661	0.4465	synonymous	BCAR1	none	NA	Pancreatic_Islets	0	0	0	1	1	1	1	0	0	0	0	0	0	0	0	0	0	0	0	0	0	0	0	0	1	1	0	0	1	1	1	1	1
Multiple_sclerosis	rs7190458-A	rs247443	chr16	75465073	0.0275	none	CFDP1	none	NA	Pancreatic_Islets	0	0	0	0	1	1	1	1	1	1	1	1	0	0	0	0	0	0	1	1	1	1	1	0	0	0	1	1	1	1	0	1	1
Multiple_sclerosis	rs1474176-G	rs1474176	chr16	86008814	0.3048	none	none	none	NA	colonic_mucosa	0	0	0	0	0	0	0	0	0	0	1	0	0	0	1	0	0	0	1	0	0	0	0	1	1	0	1	1	0	1	0	0	0
Multiple_sclerosis	rs1474176-G	rs4843330	chr16	86005964	0.1163	none	none	none	NA	colonic_mucosa	0	0	0	0	0	0	0	1	1	1	1	1	1	1	1	1	0	1	1	1	1	1	1	1	1	0	0	1	0	1	0	0	0
Multiple_sclerosis	rs1474176-G	rs4843328	chr16	86004220	0.109	none	none	none	NA	none	0	0	0	0	0	0	0	0	0	0	0	0	0	0	0	0	0	0	0	0	0	0	0	0	0	0	0	0	0	0	0	0	0
Multiple_sclerosis	rs1474176-G	rs4843880	chr16	86008641	0.0922	none	none	none	NA	colonic_mucosa	0	0	0	0	0	0	0	0	0	0	1	0	0	0	1	0	0	0	1	0	0	0	0	1	1	0	1	1	0	1	0	0	0
Multiple_sclerosis	rs1474176-G	rs2049083	chr16	86007706	0.0917	none	none	none	NA	colonic_mucosa	0	1	0	0	0	0	0	0	0	0	0	1	1	1	0	0	0	1	0	0	0	1	0	1	1	1	1	1	0	1	0	0	0
Multiple_sclerosis	rs1474176-G	rs9308364	chr16	86003446	0.0718	none	none	none	NA	GM12878	0	0	0	0	0	0	0	1	0	1	1	1	1	1	1	0	0	1	1	1	0	1	0	1	1	0	0	0	1	1	0	0	0
Multiple_sclerosis	rs1474176-G	rs4843329	chr16	86004239	0.0675	none	none	none	NA	none	0	0	0	0	0	0	0	0	0	0	0	0	0	0	0	0	0	0	0	0	0	0	0	0	0	0	0	0	0	0	0	0	0
Multiple_sclerosis	rs1474176-G	rs35929052	chr16	85994484	0.0344	none	none	none	NA	none	0	0	0	0	0	0	0	0	0	0	0	0	0	0	0	0	0	0	0	0	0	0	0	0	0	0	0	0	0	0	0	0	0
Multiple_sclerosis	rs12946510-A	rs12946510	chr17	37912377	0.314	none	none	IKZF3	-	adult_CD20	1	1	1	1	1	1	1	1	1	1	1	1	1	1	1	1	1	1	1	1	1	1	1	1	1	1	1	1	1	1	1	1	1
Multiple_sclerosis	rs12946510-A	rs11658993	chr17	37940808	0.067	none	IKZF3	IKZF3	-	CD25+_CD127-_Treg	0	0	0	0	0	0	0	1	1	1	1	1	1	1	1	0	1	0	1	1	1	0	0	0	0	0	0	0	0	0	1	0	0
Multiple_sclerosis	rs12946510-A	rs12942330	chr17	37939839	0.0428	none	IKZF3	none	NA	B_Cell_Centroblast	0	0	0	0	0	0	0	1	1	1	1	1	1	1	1	1	1	0	1	1	1	1	0	1	1	0	0	0	0	0	0	0	0
Multiple_sclerosis	rs4796791-A	rs4796791	chr17	40530763	0.0995	none	STAT3	none	NA	GM12878	1	1	1	1	1	1	1	1	1	1	1	1	1	1	1	1	1	1	1	1	1	1	1	1	1	1	1	1	1	1	1	1	1
Multiple_sclerosis	rs4796791-A	rs957970	chr17	40519890	0.0663	none	STAT3	none	NA	none	0	0	0	0	0	0	0	0	0	0	0	0	0	0	0	0	0	0	0	0	0	0	0	0	0	0	0	0	0	0	0	0	0
Multiple_sclerosis	rs4796791-A	rs1026916	chr17	40529835	0.0645	none	STAT3	none	NA	Pancreatic_Islets	0	1	1	1	1	1	1	1	1	1	1	1	1	1	1	1	0	1	1	1	1	1	1	1	1	1	1	1	1	1	0	1	1
Multiple_sclerosis	rs4796791-A	rs35840966	chr17	40521204	0.0559	none	STAT3	none	NA	none	0	0	0	0	0	0	0	0	0	0	0	0	0	0	0	0	0	0	0	0	0	0	0	0	0	0	0	0	0	0	0	0	0
Multiple_sclerosis	rs4796791-A	rs7211777	chr17	40534075	0.0511	none	STAT3	none	NA	Liver1	0	0	1	0	1	1	1	1	1	1	1	1	1	1	1	1	0	1	1	1	1	1	1	1	1	1	1	1	1	1	1	1	1
Multiple_sclerosis	rs4796791-A	rs7219739	chr17	40531761	0.0398	none	STAT3	none	NA	B_Cell_Centroblast	1	0	1	1	1	1	1	1	1	1	1	1	1	1	1	1	1	1	1	1	1	1	1	1	1	1	1	1	1	1	0	1	1
Multiple_sclerosis	rs4796791-A	rs12942611	chr17	40535184	0.0359	none	STAT3	none	NA	B_Cell_Centroblast	0	0	1	0	1	1	1	1	1	1	1	1	1	1	0	0	1	1	1	1	1	1	1	1	1	1	1	1	1	1	1	1	1
Multiple_sclerosis	rs4796791-A	rs8071537	chr17	40530895	0.0358	none	STAT3	none	NA	GM12878	1	1	1	1	1	1	1	1	1	1	1	1	1	1	1	1	1	1	1	1	1	1	1	1	1	1	1	1	1	1	1	1	1
Multiple_sclerosis	rs4796791-A	rs4796647	chr17	40543992	0.0351	none	none	none	NA	Th1	0	0	1	0	1	0	1	1	0	1	1	1	1	1	1	0	1	0	1	1	1	1	1	1	1	0	1	1	0	0	0	1	1
Multiple_sclerosis	rs4796791-A	rs2306581	chr17	40500265	0.0341	none	STAT3	none	NA	AdiposeNuclei	1	1	0	1	1	1	1	1	1	1	1	1	1	1	1	1	1	1	1	1	0	1	1	1	1	1	1	1	1	1	0	1	1
Multiple_sclerosis	rs4796791-A	rs9913597	chr17	40510316	0.0329	none	STAT3	none	NA	GM12878	0	1	0	0	1	1	1	1	1	1	1	1	1	1	1	1	1	1	1	1	1	1	1	1	1	1	1	1	1	1	1	1	1
Multiple_sclerosis	rs4796791-A	rs8073517	chr17	40503324	0.0302	none	STAT3	none	NA	none	0	0	0	0	0	0	0	0	0	0	0	0	0	0	0	0	0	0	0	0	0	0	0	0	0	0	0	0	0	0	0	0	0
Multiple_sclerosis	rs4796791-A	rs17886724	chr17	40496163	0.0288	none	STAT3	none	NA	Th1	0	0	0	0	0	0	0	1	1	0	1	1	1	1	1	0	0	1	1	1	1	1	0	1	0	1	0	0	1	1	0	1	1
Multiple_sclerosis	rs34536443-C	rs34536443	chr19	10463118	0.6883	missense	TYK2	none	NA	Liver1	0	0	1	0	1	1	1	0	0	1	0	0	1	0	1	0	0	1	1	0	0	0	0	1	1	1	0	1	1	1	0	0	0
Multiple_sclerosis	rs34536443-C	rs7256672	chr19	10579474	0.1075	utr3	PDE4A	none	NA	none	0	0	0	0	0	0	0	0	0	0	0	0	0	0	0	0	0	0	0	0	0	0	0	0	0	0	0	0	0	0	0	0	0
Multiple_sclerosis	rs34536443-C	rs74956615	chr19	10427721	0.0987	utr3	RAVER1	none	NA	CD25+_CD127-_Treg	0	1	0	0	1	0	1	1	0	1	1	0	0	0	1	0	1	1	1	0	1	1	1	0	0	0	0	0	1	0	0	0	0
Multiple_sclerosis	rs34536443-C	rs144309607	chr19	10492274	0.0493	none	none	none	NA	K562	1	1	1	1	1	1	1	1	1	1	1	1	1	1	1	1	1	1	1	1	1	1	1	1	1	1	1	1	1	1	1	1	1
Multiple_sclerosis	rs11554159-G	rs11554159	chr19	18285944	0.4043	missense	IFI30	none	NA	adult_CD14	1	1	1	1	1	1	1	1	1	1	1	1	1	1	1	0	1	1	1	1	1	1	1	1	1	1	1	1	1	1	0	1	0
Multiple_sclerosis	rs11554159-G	rs11668950	chr19	18282940	0.1339	none	PIK3R2	none	NA	adult_CD14	1	1	1	1	1	1	1	1	1	1	1	1	1	1	1	0	1	1	1	1	1	1	1	1	1	1	1	1	1	1	0	1	1
Multiple_sclerosis	rs11554159-G	rs62120372	chr19	18305185	0.063	none	MPV17L2	none	NA	CD45RO_CD8	1	1	1	1	1	1	1	1	1	1	1	1	1	1	1	1	1	1	1	1	1	1	1	1	1	1	1	1	1	1	1	1	1
Multiple_sclerosis	rs11554159-G	rs874628	chr19	18304700	0.0475	missense	MPV17L2	none	NA	CD45RO_CD8	1	1	1	1	1	1	1	1	1	1	1	1	1	1	1	1	1	1	1	1	1	1	1	1	1	1	1	1	1	1	1	1	1
Multiple_sclerosis	rs11554159-G	rs62120363	chr19	18297608	0.0455	none	none	none	NA	none	0	0	0	0	0	0	0	0	0	0	0	0	0	0	0	0	0	0	0	0	0	0	0	0	0	0	0	0	0	0	0	0	0
Multiple_sclerosis	rs11554159-G	rs57898504	chr19	18294923	0.0359	none	none	none	NA	none	0	0	0	0	0	0	0	0	0	0	0	0	0	0	0	0	0	0	0	0	0	0	0	0	0	0	0	0	0	0	0	0	0
Multiple_sclerosis	rs11554159-G	rs34147202	chr19	18290415	0.0282	none	none	none	NA	B_Cell_Centroblast	0	0	0	0	1	0	0	1	0	1	0	1	0	1	1	0	0	1	1	1	1	1	0	0	0	0	0	0	1	1	0	0	0
Multiple_sclerosis	rs11554159-G	rs11666265	chr19	18292282	0.0282	none	none	none	NA	adult_CD20	0	0	0	0	1	0	0	0	1	1	1	0	0	1	0	0	1	1	1	1	1	1	1	0	1	0	0	0	0	0	0	0	0
Multiple_sclerosis	rs202550-A	rs202550	chr20	1659899	0.0971	none	none	none	NA	CD25-_CD45RA+_naive	0	0	0	0	0	0	0	1	1	1	1	0	1	1	1	1	0	0	1	0	0	0	0	0	1	0	1	0	0	0	0	0	0
Multiple_sclerosis	rs202550-A	rs202546	chr20	1663539	0.0971	none	none	none	NA	CD25-_CD45RA+_naive	0	0	0	0	0	0	0	1	1	1	1	1	0	0	0	1	1	0	0	0	0	0	0	0	0	0	1	0	0	0	0	0	0
Multiple_sclerosis	rs202550-A	rs202543	chr20	1664608	0.0971	none	none	none	NA	CD25-_CD45RA+_naive	0	0	0	0	0	0	0	1	1	1	1	0	1	1	1	1	0	0	0	0	1	0	0	0	1	0	0	0	0	0	0	0	0
Multiple_sclerosis	rs202550-A	rs202544	chr20	1664446	0.0699	none	none	none	NA	CD45RA_CD8	0	0	0	0	0	0	0	1	1	1	1	1	1	1	1	1	1	0	0	0	0	0	0	0	1	1	0	0	0	0	0	0	0
Multiple_sclerosis	rs202550-A	rs202542	chr20	1665110	0.0699	none	none	none	NA	CD25-_CD45RA+_naive	0	0	0	0	0	0	0	1	1	1	1	0	1	1	1	1	0	0	0	0	1	0	0	0	1	0	0	0	0	0	0	0	0
Multiple_sclerosis	rs202550-A	rs202541	chr20	1665123	0.0699	none	none	none	NA	CD25-_CD45RA+_naive	0	0	0	0	0	0	0	1	1	1	1	0	1	1	1	1	0	0	0	0	1	0	0	0	1	0	0	0	0	0	0	0	0
Multiple_sclerosis	rs202550-A	rs202538	chr20	1665574	0.0699	none	none	none	NA	CD25-_CD45RA+_naive	0	0	0	0	0	0	0	1	1	1	1	0	1	1	1	1	0	0	0	0	1	0	0	0	1	0	0	0	0	0	0	0	0
Multiple_sclerosis	rs202550-A	rs202537	chr20	1666106	0.0699	none	none	none	NA	Th0	0	0	0	0	0	0	0	1	1	1	1	1	1	1	1	1	1	1	0	0	1	0	0	1	1	0	0	0	0	0	0	0	0
Multiple_sclerosis	rs202550-A	rs202547	chr20	1663315	0.0681	none	none	none	NA	CD25-_CD45RA+_naive	0	0	0	0	0	0	0	1	1	1	1	1	0	0	0	1	1	0	0	0	0	0	0	0	0	0	1	0	0	0	0	0	0
Multiple_sclerosis	rs202550-A	rs202545	chr20	1664390	0.0502	none	none	none	NA	CD45RA_CD8	0	0	0	0	0	0	0	1	1	1	1	1	1	1	1	1	1	0	0	0	0	0	0	0	1	1	0	0	0	0	0	0	0
Multiple_sclerosis	rs202550-A	rs202540	chr20	1665172	0.0474	none	none	none	NA	CD25-_CD45RA+_naive	0	0	0	0	0	0	0	1	1	1	1	0	1	1	1	1	0	0	0	0	1	0	0	0	1	0	0	0	0	0	0	0	0
Multiple_sclerosis	rs202550-A	rs202539	chr20	1665365	0.0446	none	none	none	NA	CD25-_CD45RA+_naive	0	0	0	0	0	0	0	1	1	1	1	0	1	1	1	1	0	0	0	0	1	0	0	0	1	0	0	0	0	0	0	0	0
Multiple_sclerosis	rs202550-A	rs2250253	chr20	1657329	0.0363	none	none	none	NA	Th0	0	1	1	1	1	0	0	1	1	1	1	1	1	1	1	1	1	0	0	0	0	0	0	0	1	0	1	0	0	0	0	0	0
Multiple_sclerosis	rs202550-A	rs202553	chr20	1658707	0.0354	none	none	none	NA	Th1	0	0	0	0	0	0	0	1	0	1	1	0	1	1	1	1	0	0	1	0	0	0	0	0	0	0	0	0	0	0	0	0	0
Multiple_sclerosis	rs202550-A	rs202552	chr20	1659171	0.0296	none	none	none	NA	Th1	0	0	0	0	0	0	0	1	0	1	1	0	1	1	1	1	0	0	1	0	0	0	0	0	0	0	0	0	0	0	0	0	0
Multiple_sclerosis	rs76728843-A	rs76728843	chr20	48455302	0.3611	none	SLC9A8	none	NA	none	0	0	0	0	0	0	0	0	0	0	0	0	0	0	0	0	0	0	0	0	0	0	0	0	0	0	0	0	0	0	0	0	0
Multiple_sclerosis	rs76728843-A	rs17786148	chr20	48474504	0.0703	none	SLC9A8	none	NA	anterior_caudate	1	1	1	1	1	1	1	0	1	0	0	0	0	0	1	1	1	1	0	0	0	0	0	0	0	0	1	1	1	1	1	1	1
Multiple_sclerosis	rs76728843-A	rs76914010	chr20	48453511	0.0658	none	SLC9A8	none	NA	none	0	0	0	0	0	0	0	0	0	0	0	0	0	0	0	0	0	0	0	0	0	0	0	0	0	0	0	0	0	0	0	0	0
Multiple_sclerosis	rs76728843-A	rs17785991	chr20	48438761	0.0596	none	SLC9A8	none	NA	CD25+_CD127-_Treg	1	0	1	1	0	1	0	1	1	1	1	1	1	1	1	1	1	1	1	1	1	1	0	1	1	0	1	1	0	1	1	1	1
Multiple_sclerosis	rs76728843-A	rs2869935	chr20	48493927	0.0551	none	SLC9A8	none	NA	HepG2	1	1	1	1	1	1	1	1	1	0	1	1	1	0	1	1	0	1	1	0	1	1	0	1	0	0	1	0	1	0	1	1	1
Multiple_sclerosis	rs76728843-A	rs113942369	chr20	48458601	0.0486	none	SLC9A8	none	NA	HSMM-myotube	1	1	1	0	0	1	0	1	1	1	1	0	1	1	1	1	1	1	1	1	0	1	0	1	1	0	1	1	1	1	1	0	1
[truncated: 6,742 more rows]
